# Supplementary material for: Functional genomics of AP-2α and AP-2γ in cancers: in silico study
Source: BMC Med Genomics. 2020 Nov 19;13:174. doi: 10.1186/s12920-020-00823-9 (PMC7678100; doi:10.1186/s12920-020-00823-9)
Supplement: Supplementary file 1 — Additional file 1. Content of modules from particular Monocle3 approach. [file 12920_2020_823_MOESM1_ESM.xlsx]

## Sheet: AP-2α - cancer vs (non)-cancer
Additional file 1 – Content of modules from particular Monocle3 approach.
MODULE 1						MODULE 2						MODULE 3						MODULE 4						MODULE 6						MODULE 8						MODULE 9						MODULE 10						MODULE 11
id	module	supermodule	dim_1	dim_2		id	module	supermodule	dim_1	dim_2		id	module	supermodule	dim_1	dim_2		id	module	supermodule	dim_1	dim_2		id	module	supermodule	dim_1	dim_2		id	module	supermodule	dim_1	dim_2		id	module	supermodule	dim_1	dim_2		id	module	supermodule	dim_1	dim_2		id	module
A2ML1	1	1	0.56627255184211	-1.41815996035059		AAAS	2	1	0.940078532505856	2.50199618325512		ACACA	3	1	2.33601688844718	2.99162948266546		ABCA1	4	1	2.55866574747123	0.00916004315893115		ABCB8	6	3	6.26731168729819	1.65971338883917		ABHD12	8	4	3.73057496053733	-3.20210504396875		ACO2	9	5	4.92142784101524	3.53203117982428		ADK	10	6	-2.42186487215005	2.67466773227732		ABHD14A	11
AAK1	1	1	0.738540301747696	1.17677724496405		AACS	2	1	0.912874989859836	2.55904029444735		ACBD4	3	1	2.63543927175559	3.41554516688864		ABCA2	4	1	2.61790954572715	0.633708597579402		AGAP3	6	3	6.27993118269004	1.63464945689718		ACSS1	8	4	3.50032984716453	-3.00782060488184		AP1B1	9	5	4.87850200635947	3.59299087659399		ANXA11	10	6	-2.55012643831216	2.6657531870989		ABHD14B	11
AATK	1	1	-0.516913061313255	-2.39952897890528		ABCA7	2	1	1.78723638755836	4.93970084325354		ACLY	3	1	2.44820165140189	3.05986285344641		ABCG1	4	1	2.29526733858146	-0.149532078346806		AGFG2	6	3	6.14986431104697	1.72767233983557		ACSS2	8	4	3.7946234892086	-3.28580093248804		ARSA	9	5	4.90653049451865	3.6130217327265		ARHGAP21	10	6	-2.28238404291116	2.22137372330706		ACAA1	11
ABAT	1	1	-0.953695540599449	0.165305615821285		ABCB9	2	1	0.753231550283806	2.68125432864706		ACTG1	3	1	3.27394425375022	3.0286163105158		ABL1	4	1	2.81156467897453	0.2699847234873		AGK	6	3	6.34473859769859	1.5525307668833		AHCY	8	4	3.89161979658164	-3.30362272127588		ARVCF	9	5	4.88994657499351	3.58825755254309		ARID5B	10	6	-2.61604369180642	2.22039009765665		AMT	11
ABCA13	1	1	-0.636236791782005	-1.59220790728052		ABHD8	2	1	1.22355684144057	4.73608160153906		ADCY9	3	1	2.95776664716758	5.10181117192785		ACSF3	4	1	3.98006808263816	1.33688557282965		AHCYL2	6	3	6.18471157056846	1.58402454988043		ARFGAP1	8	4	3.84324585897483	-3.30447959764917		ASCC2	9	5	4.93142258626975	3.62421322003881		ASCC1	10	6	-2.41474140184365	2.70872259275		ANO10	11
ABCA3	1	1	-1.00136316316567	-1.6221222864004		ACAP3	2	1	-0.0324161102100448	3.44521308080236		AKAP1	3	1	3.19606911642112	3.08146137134115		ACYP2	4	1	4.04530155164756	1.17169594899694		AP1S1	6	3	6.22222339612998	1.62589270011465		ARFGEF2	8	4	3.92320310575523	-3.36493968828638		ATF4	9	5	4.90219795209922	3.69232034818212		BAG3	10	6	-2.45002210634194	2.55161807076017		ARHGEF3	11
ABCA4	1	1	-0.320202713183983	-1.388675926766		ACOT7	2	1	0.110983187981026	3.33929717675726		ANAPC11	3	1	3.3041003893093	2.99175131455938		ADAMTS13	4	1	2.86050211889304	0.956830383696956		ARPC1A	6	3	6.13050138456382	1.75623542205374		ATP9A	8	4	3.8892735193447	-3.33230590685328		ATXN10	9	5	4.87674915296592	3.57530570165197		BMPR1A	10	6	-2.42446220415078	2.58662030235807		ARIH2	11
ABCB1	1	1	-1.03693736093484	-0.386295555672246		ACTN4	2	1	-0.0780956794544295	5.05870461598913		AP2B1	3	1	2.5201193044857	3.16986501351873		AGPAT2	4	1	2.75593268377341	0.311403037467403		ARPC1B	6	3	6.21255981428184	1.67347413436453		ATRN	8	4	3.61834966642417	-3.04793405397852		BCR	9	5	4.89576518041648	3.49809122220556		BTRC	10	6	-2.49994433420144	2.62755930558721		ARL8B	11
ABCC1	1	1	-1.18132460611306	0.740959884086055		ACTR6	2	1	0.858310515709297	2.54487343267481		APPBP2	3	1	3.0627993295864	3.16020506755392		AMFR	4	1	4.00909363729514	1.37603163854162		ATXN7L1	6	3	6.21484958631553	1.69630795852224		B4GALT5	8	4	3.90398203832664	-3.36416005953272		BID	9	5	4.82179963094749	3.64306414262335		CAMK2G	10	6	-2.48786271112405	2.52246771142761		ATG7	11
ABCC11	1	1	-0.748369579486473	0.478555561461849		ACVR1B	2	1	0.846301111109631	2.49422224000971		ARHGAP17	3	1	3.10440194112815	5.24404168263952		ANAPC2	4	1	2.84283303720512	0.363794566550655		BAZ1B	6	3	6.25360691053428	1.67268759147207		BCL2L1	8	4	3.59889161092796	-3.13182878359278		CABIN1	9	5	4.86458765966453	3.46471965447943		CCDC6	10	6	-2.39719188707314	2.61100095645468		ATRIP	11
ABCC12	1	1	-1.5193265725895	-3.21611499651392		ADCY6	2	1	1.14985820157088	2.28240071372072		ARHGDIA	3	1	3.28101646406211	3.00168198482077		ANKRD11	4	1	4.05492674810447	1.42377245561163		BRI3	6	3	6.22943889600791	1.67041760818045		BLCAP	8	4	3.86057698232688	-3.31535529955347		CDC42EP1	9	5	4.87449132902183	3.49082684651892		CCNY	10	6	-2.32937920587502	2.53077706829588		ATXN7	11
ABCC3	1	1	-0.746165757350548	0.460568667807979		AEBP2	2	1	0.850715267188923	2.25975921885054		ASPSCR1	3	1	3.35542118055381	2.93940836326162		APRT	4	1	3.96392857534446	1.43492657081167		CDK5	6	3	6.22750961286582	1.6156519068865		C20orf194	8	4	3.26468026144065	-2.74028110369165		CERK	9	5	4.82932126028098	3.49337422982733		CHST3	10	6	-2.44782698648415	2.3514772741584		BTD	11
ABCC4	1	1	-0.910702114276512	-1.06870984896143		AGPAT3	2	1	1.13972031576194	3.06657028333227		AXIN1	3	1	2.99880349142112	5.12405157224218		ARRDC1	4	1	2.74849533540763	0.328939916053218		CHCHD3	6	3	6.27314674360313	1.64317339793722		CABLES2	8	4	3.86654459936179	-3.30490970476587		CLTCL1	9	5	4.79250013334312	3.4496790184168		CISD1	10	6	-2.39928615587197	2.70090276137869		CCDC12	11
ABCC8	1	1	-1.0815721799656	-2.77572584017237		AGRN	2	1	-0.145464902095421	3.48514819280188		B3GNTL1	3	1	3.31011902792014	2.97734695807974		ATG16L2	4	1	2.99197184545554	1.385325194755		COG5	6	3	6.28733837110557	1.6106207980303		CBFA2T2	8	4	3.8922043989376	-3.34119415148218		COMT	9	5	4.79262554151572	3.61987209455053		CNNM2	10	6	-2.45231497781716	2.64444521204512		CMTM8	11
ABCD1	1	1	2.0131692836956	-2.73089361055811		AHDC1	2	1	0.030667776890175	3.29727554456274		BAIAP2	3	1	3.33763682348289	2.99102324382345		ATP6V0D1	4	1	4.027262086697	1.40423226491491		CREB3L2	6	3	6.32213794691123	1.57575339213888		CEP250	8	4	3.90516912443198	-3.37728643282373		CSNK1E	9	5	4.93057023984946	3.59017646447699		CPEB3	10	6	-2.41657794015847	2.61830103532354		CTDSPL	11
ABCG2	1	1	-2.58654892938576	-0.492412327370244		AK2	2	1	-0.106525902919395	3.26826238767187		BCAS3	3	1	3.00099288923301	3.15089249745886		AUH	4	1	2.79301750165977	0.25330615178625		CUX1	6	3	6.21768915159263	1.64077139035742		CHD6	8	4	3.90283977491416	-3.36206817491968		CYB5R3	9	5	4.86167561513938	3.5756191028742		CTBP2	10	6	-2.4526966859623	2.58687533573191		CTNNB1	11
ABHD11	1	1	1.42751156789817	-0.365227221092778		AKAP8L	2	1	1.39372020465888	4.77149415151159		BCL7C	3	1	3.01901447279014	5.09435391561071		BANP	4	1	3.96646034223594	1.41161883012335		DNAJB6	6	3	6.30377828580894	1.61276328698675		CHMP4B	8	4	3.88960825902976	-3.35091686113794		DEPDC5	9	5	4.95344840986289	3.57529950276892		CUEDC2	10	6	-2.46557534234963	2.65868556634466		DUSP7	11
ABHD2	1	1	2.3076016853527	-1.7869205461355		AKT1S1	2	1	-0.00656480091057576	5.02233958379309		BFAR	3	1	3.04041850072898	5.18047905103247		BCAR1	4	1	3.9537163923458	1.34473407403509		EPHB4	6	3	6.165525550671	1.72491258517782		CST3	8	4	3.58039247495689	-3.05239295824488		DGCR2	9	5	4.88845288259544	3.55009853974859		DIP2C	10	6	-2.22889483468972	2.23549159006159		EIF4E3	11
ABHD3	1	1	0.842992673344986	0.44396960870306		AKT2	2	1	-0.108241801433189	5.10649323598425		C12orf60	3	1	2.5221807907299	4.28152942792456		BICD2	4	1	2.74192082387962	0.200156928458614		ESYT2	6	3	6.32046854002036	1.61945855752508		CTNNBL1	8	4	3.8857334802822	-3.3462901101919		EP300	9	5	4.86601006490745	3.51356947557013		DLG5	10	6	-2.50801790254555	2.58697168664019		EXOSC7	11
ABLIM1	1	1	0.891014615722077	-1.31455349787195		AMN1	2	1	0.909981530807988	2.42672478769616		C16orf72	3	1	3.02446686727561	5.1903059496073		BRD3	4	1	2.75836586458244	0.253741027274532		EXOC4	6	3	6.33054220182456	1.59181589023153		DIDO1	8	4	3.85794388753928	-3.30629920824488		EWSR1	9	5	4.89435231191672	3.6018311990885		DNAJB12	10	6	-2.50595009820901	2.65464422241728		FHIT	11
ABLIM2	1	1	-0.718006496600731	-1.16643094881495		ANKRD27	2	1	-0.11649466054879	5.096258164802		CARHSP1	3	1	3.05668842298545	5.14491439000647		BTBD19	4	1	2.91200112802543	1.50742358104269		FBXO24	6	3	6.10826360685386	1.73183769122641		DLGAP4	8	4	3.90676629049339	-3.37214469774683		GAS2L1	9	5	4.92757451040305	3.51810085908453		DNMBP	10	6	-2.37673938768349	2.57508576051275		FLNB	11
ABTB2	1	1	-0.084315304927452	-0.443801163277226		ANKS1A	2	1	2.276454324551	2.059088887134		CASKIN2	3	1	3.1193088243679	3.03689015046637		CAMSAP1	4	1	2.64048587781944	0.24493646756689		GALNT11	6	3	6.3032675932125	1.59830129281561		ENTPD6	8	4	3.78864418966331	-3.25653695925196		GGA1	9	5	4.91298901540794	3.58922529355566		DOCK1	10	6	-2.46063983934365	2.60869604484121		FOXP1	11
ACBD6	1	1	-1.93046153085671	1.41174221173803		ANO6	2	1	0.522829736299889	2.08869549767057		CBX4	3	1	3.16396724683799	3.09265804425756		CCDC102A	4	1	3.96608387929954	1.38593948022406		GIGYF1	6	3	6.2361551473812	1.74062883988897		GMEB2	8	4	3.82320129377403	-3.27357101305445		GGT1	9	5	4.68406903249778	3.61258793012182		ECHS1	10	6	-2.51798809068642	2.68264749781172		GLB1	11
ACHE	1	1	-0.911199455432518	-3.14387655123194		AP2A1	2	1	0.0156448434070512	5.02267742291967		CBX8	3	1	3.24512922269859	3.06674403087179		CCDC154	4	1	2.88659810525932	1.06031787530462		GNB2	6	3	6.1908670614437	1.69583696261923		GNAS	8	4	3.89562999708213	-3.3505682931753		GRAMD4	9	5	4.92883669836082	3.56967961923162		GBF1	10	6	-2.49964058893166	2.64208310977499		GNAI2	11
ACOT11	1	1	0.934854311585502	-0.587377546867924		AP3D1	2	1	1.66483526927985	5.02851009503881		CCDC47	3	1	3.17951857549705	3.1348711265711		CDC14B	4	1	2.57574545843162	0.102088929572505		GTF2IRD1	6	3	6.11086856824912	1.5256643904833		HM13	8	4	3.86671483022727	-3.31817865236719		JOSD1	9	5	4.84747898084678	3.56567847863714		GSTO1	10	6	-2.45310557382546	2.66827435926477		GPD1L	11
ACOX2	1	1	-1.44304931657754	0.29395294324438		APPL2	2	1	0.896057563550846	2.46280587599556		CCDC57	3	1	3.28102027875938	2.62998846308271		CDC25B	4	1	2.39755224687614	0.444489838042659		HBP1	6	3	6.33202993375816	1.56646180287878		KIF16B	8	4	3.67970144254722	-3.12628364428003		KIAA1671	9	5	4.87621962530173	3.50777912274877		HK1	10	6	-2.49903762834512	2.56571303442995		HDAC11	11
ACOX3	1	1	-0.224583511523826	1.87062263623754		ARHGEF1	2	1	-0.0549668123050765	5.04096984998266		CDC42EP4	3	1	2.91407370073356	2.78858465091268		CDK10	4	1	3.90134655935325	1.38290703431646		HIP1	6	3	6.15894186002769	1.71802067891638		KRBA1	8	4	3.2031768511013	-2.63906335695704		KREMEN1	9	5	4.66629659635581	3.29809570447485		HNRNPF	10	6	-2.45422637956582	2.58552290634195		HYAL3	11
ACOXL	1	1	-1.51782000558816	-1.33429193361719		ARHGEF18	2	1	1.54202866060294	4.87201523915808		CHTF18	3	1	2.78598641855277	4.83096218244116		CENPP	4	1	2.86094700796165	0.329948903479976		HIPK2	6	3	6.37077152235068	1.57633018628637		LPIN3	8	4	3.80150901777305	-3.21788406237085		LIMK2	9	5	4.90915739042319	3.50990104810278		IDE	10	6	-2.38875544565163	2.60373433069269		IL17RC	11
ACSBG1	1	1	-0.923694377116783	-4.21371316774805		ARHGEF19	2	1	0.170006806679146	3.24823510781805		CLEC16A	3	1	2.98788964254417	5.14163780347387		CENPT	4	1	3.55049716932334	1.39748180047552		IFRD1	6	3	6.25376140577354	1.65620243684332		MAVS	8	4	3.78718506795921	-3.11897373064478		LMF2	9	5	4.92069255811729	3.5987874282984		INPP5A	10	6	-2.51764429109536	2.59971766308824		IP6K1	11
ACSF2	1	1	-0.678761725597008	0.187806130805416		ARID1A	2	1	-0.033225422076805	3.15909689799826		COG7	3	1	3.05649125082053	5.20830965177099		CFDP1	4	1	4.03355419141807	1.39636469022314		IMMP2L	6	3	6.3252836416439	1.66116881505529		NCOA3	8	4	3.95091139776267	-3.42713975771387		LRP5L	9	5	4.92843973142661	3.52326774732153		INPP5F	10	6	-2.50122297304116	2.49752457574884		IQSEC1	11
ACSL1	1	1	-0.0963845302387313	1.36417675153295		ARID2	2	1	0.83862914396085	2.36255286768953		CORO7	3	1	2.99113356573142	5.06181883946936		CHD9	4	1	3.99656474096336	1.37422216073553		IMPDH1	6	3	6.23060857755698	1.61225628987829		NCOA6	8	4	3.91072880727805	-3.36519813402613		MED15	9	5	4.89737545949973	3.59433031217138		ITGB1	10	6	-2.4335373689457	1.9781063510565		KAT2B	11
ACSL3	1	1	1.27391877276458	1.58914309875051		ARID3A	2	1	1.71117257577934	4.80909276143591		CPD	3	1	2.37501203519859	3.07704705134909		CIZ1	4	1	2.78225278360404	0.333117486396236		KCTD7	6	3	6.21703731519736	1.67521441117804		NECAB3	8	4	3.77433263761558	-3.23527812822779		MICAL3	9	5	4.88598429662742	3.54874742166082		JMJD1C	10	6	-2.40085661905251	2.56800583139936		LARS2	11
ACSL6	1	1	-0.578111891917808	-1.3051159368368		ASF1B	2	1	1.59289818508186	3.55126702920477		CREBBP	3	1	3.01337253553428	5.16052174703161		CMIP	4	1	4.06711279851951	1.34812176362554		LIMK1	6	3	6.15250265104331	1.58376634255926		NPEPL1	8	4	3.7666898916439	-3.2121930108877		MPST	9	5	4.85466014844932	3.58995068208258		KAZALD1	10	6	-2.47526610391579	2.53023438290636		LIMD1	11
ACSM3	1	1	-0.47631288068734	0.0383780016092485		ATF1	2	1	0.769808272548096	2.43671931927036		CSNK1D	3	1	3.25736295682945	3.02853471175711		CMTM4	4	1	3.59060227376975	1.43246519700567		LMBR1	6	3	6.2527190397457	1.64860707656424		OGFR	8	4	3.7914816091732	-3.26736450060328		MTMR3	9	5	4.84886180860557	3.48544895783941		LDB1	10	6	-2.4274395753666	2.48519750446956		MAGI1	11
ACSS3	1	1	-1.9587489415928	-2.15482425554712		ATN1	2	1	0.960165454723017	2.35276230559627		CUEDC1	3	1	2.64139830572166	3.04879421130697		COTL1	4	1	4.16970693571128	1.13340115682165		LRCH4	6	3	6.16068565351524	1.7065173401026		OSBPL2	8	4	3.87529789907493	-3.3345246301504		MYH9	9	5	4.89037262899436	3.58805763856451		LHPP	10	6	-2.53412092225991	2.69538721577208		MAP4	11
ACTA2	1	1	-2.99826610582314	-2.56684732302149		ATP13A1	2	1	1.41254963976897	4.78567147389929		CYB561	3	1	3.15486180288352	3.06670814887564		CPNE2	4	1	3.68453704816856	1.1476258052973		LUC7L2	6	3	6.2727295110897	1.66820633546392		PHF20	8	4	3.91249954206504	-3.37008523806055		NCAPH2	9	5	4.83430277807273	3.64302730695288		LRRC20	10	6	-2.41855156915627	2.62014664844553		MAPKAPK3	11
ACTB	1	1	1.78633892042197	0.932790995994014		ATP2B1	2	1	0.666187937088387	2.24020397798101		CYTH1	3	1	3.31415712339439	2.97002935544531		CRAT	4	1	2.85171758634605	0.372656108298702		MKLN1	6	3	6.32739126188316	1.5955644859461		PIGU	8	4	3.88769208890952	-3.34499168261011		NF2	9	5	4.8078104208187	3.42683965102713		LRRC27	10	6	-2.5239664365574	2.63707117871324		MON1A	11
ACTN1	1	1	-2.85861099260293	-2.57567453249415		ATXN1	2	1	2.21209585172691	2.09420216218512		DCAKD	3	1	2.81033932668723	3.19951290027182		CSAD	4	1	2.98500453931846	1.43669259683172		NAA38	6	3	6.26627981168784	1.67147308723013		PLCG1	8	4	3.87359177572288	-3.32672405107935		OSBP2	9	5	4.9841495702938	3.51480114594976		LZTS2	10	6	-2.52324069040261	2.57212682203333		MYD88	11
ACVR1	1	1	1.02519452822961	1.43883252278845		ATXN2	2	1	0.996954749055283	2.58946664766352		DHX8	3	1	2.74875330431022	3.15284150973837		CTCF	4	1	4.02249371511497	1.38355171815435		NRF1	6	3	6.23241245252647	1.73911374942343		POFUT1	8	4	3.80470382673301	-3.24706601961573		PACSIN2	9	5	4.84739601118125	3.52814531461279		MAPK8	10	6	-2.133626585178	2.45574829117338		NBEAL2	11
ACVRL1	1	1	-3.06056035058938	-0.393567799172001		BAZ2A	2	1	0.922996638059692	2.49420437351744		DNAJC7	3	1	2.81110465032615	3.15737503901998		CTNNAL1	4	1	2.34051668149986	0.230643512168331		PCDHA1	6	3	14.746158237286	3.78787481919805		PPP1R3D	8	4	3.89315092069663	-3.34940767153223		PARVB	9	5	4.69717108709373	3.41580665246527		METRNL	10	6	-2.61801279085122	1.87571561471502		NEK4	11
ADA	1	1	-0.446594243220909	0.384084941306514		BCAM	2	1	-0.0512445618434981	4.52397894994299		E4F1	3	1	2.8667054126934	5.00725150243322		CYBA	4	1	4.03595816595115	1.10661304132025		PCDHA10	6	3	14.7501426885799	3.79198181764166		PSMF1	8	4	3.69481288892783	-3.1193237291189		PATZ1	9	5	4.86727749807395	3.5693342699198		MGMT	10	6	-2.45810068147622	2.67250138656179		NISCH	11
ADAM11	1	1	-0.66841161745034	-2.80464267595728		BCAT2	2	1	-0.0176221181675033	4.97380280629675		EEF2K	3	1	2.97862278921165	5.14139866963903		DAB2IP	4	1	2.80729400617637	0.332138778129024		PCDHA11	6	3	14.7508684347347	3.79229486123602		PTPN1	8	4	3.81027113897361	-3.26434087618311		PI4KA	9	5	4.95963584882774	3.57171416417639		MLLT10	10	6	-2.1781925012394	2.43710009795557		NKIRAS1	11
ADAM12	1	1	-3.54728115098916	-1.52916431292017		BCKDHA	2	1	-0.0695382406040267	5.06554746762793		EME2	3	1	2.92247282964744	4.69912195340673		DBNDD1	4	1	3.91235267622031	1.32720971242468		PCDHA12	6	3	14.7530828664974	3.79442691937963		PYGB	8	4	3.79580246908225	-3.26697444780787		PICK1	9	5	4.88477360708274	3.67624652520697		MXI1	10	6	-2.41262138383828	2.41346635152529		NR1D2	11
ADAM15	1	1	-1.99699271219216	1.48919356004278		BCL3	2	1	1.70951145393409	2.23866258696596		ERBB2	3	1	2.48205315572776	3.05735188857595		DCST2	4	1	2.84186648828544	1.13125479356329		PCDHA13	6	3	14.7535320471004	3.79508519307653		RALY	8	4	3.8510302255825	-3.30958366259058		PITPNB	9	5	4.89871799451865	3.59171247617285		MYOF	10	6	-2.42355478303872	2.34616327420752		NT5DC2	11
ADAM19	1	1	-0.935186510257347	-1.1524674878927		BCL7A	2	1	0.98798953247823	2.57983057335894		ERI2	3	1	3.05426251394309	5.20963359014074		DENND1A	4	1	2.79820870859184	0.310402156272334		PCDHA2	6	3	14.7508779714779	3.79125726357977		RBCK1	8	4	3.61402499181785	-3.10268306597193		PLA2G6	9	5	4.93849098188438	3.61569631234686		NFKB2	10	6	-2.26742208497964	2.55675368145983		OSBPL10	11
ADAM33	1	1	-2.62208188074075	-1.47755002840479		BCOR	2	1	-0.0555251290126876	2.88488730923216		FAHD1	3	1	3.00393759710349	5.0918624414591		DNAH1	4	1	2.98156463605918	1.4383299364237		PCDHA3	6	3	14.7482486913876	3.78957939282934		RBM38	8	4	3.76450192434348	-3.24533986910303		PLXNB2	9	5	4.88950335485496	3.60039186612646		OPHN1	10	6	-2.20291102426492	2.17361408607046		PCBP4	11
ADAM8	1	1	1.18420102698364	-2.58022498949488		BLVRB	2	1	-0.0521826197429732	4.95667672292273		FAM117A	3	1	2.86953317625083	3.20956933633367		EHMT1	4	1	2.7958075950817	0.324680091300411		PCDHA4	6	3	14.7478080938534	3.78912449018042		RPRD1B	8	4	3.83197199804343	-3.28118944033106		POLR2F	9	5	4.88422715169944	3.65890443460028		PAOX	10	6	-2.45580804841958	2.62946592406313		PLCD1	11
ADAMTS10	1	1	-2.99105799692117	-1.18673038347681		BPHL	2	1	2.36153971654929	1.90523332492392		FBF1	3	1	2.89540004236259	3.14683652059118		EXD3	4	1	2.78821610910453	0.557048083701534		PCDHA5	6	3	14.7474161337093	3.78882742063085		RRBP1	8	4	3.57494723302879	-2.92204141481836		POLR3H	9	5	4.89335739118613	3.58900070325415		PARD3	10	6	-2.27781713502847	2.44067168557028		PRKCD	11
ADAMTS12	1	1	-3.42863882081948	-1.59529924257715		BRCA1	2	1	1.70001422864951	3.42607832089941		FBXL19	3	1	2.99870001775779	5.17088723317663		FAM102A	4	1	2.72613560659446	0.297046901145381		PCDHA6	6	3	14.7480674932674	3.78935468331854		RTEL1	8	4	3.80048262579002	-3.26522016390284		PPM1F	9	5	4.62386857969321	3.2852327241091		PDZD7	10	6	-2.54982626932107	2.58275488153974		PTPRG	11
ADAMTS14	1	1	-3.49189126985513	-1.51547288759668		BRD4	2	1	1.40992751223602	4.81020879880468		FLOT2	3	1	2.50635528070487	3.08819919959585		FAM120A	4	1	2.68549656374015	0.190609456458492		PCDHA7	6	3	14.7481781194881	3.78955352441351		SAMD10	8	4	3.85486495000877	-3.31308507784327		PRR5	9	5	4.78069817525901	3.5294263376383		PTEN	10	6	-2.47436345117532	2.59906004504244		RAD18	11
ADAMTS16	1	1	-3.47800243394814	-1.57849120958765		BRIP1	2	1	1.60091012222327	3.50682830945532		FOXK2	3	1	3.24209677679099	3.05036908523123		FAM166A	4	1	2.82690381509818	0.952713729300899		PCDHA8	6	3	14.7470623205379	3.78838110105078		SLC23A2	8	4	3.7133394430355	-3.03596067293604		RNF215	9	5	4.97385894758262	3.61443591252844		PWWP2B	10	6	-2.55295789735757	2.54914265260975		SHISA5	11
ADAMTS17	1	1	2.00949239236869	-1.54725503786524		BRWD1	2	1	0.894778712369578	3.07745093242208		G6PC3	3	1	2.71504401666679	3.23216664926092		FANCC	4	1	2.7527886579708	0.351456881919307		PCDHA9	6	3	14.7354236791805	3.77678167954962		SLC35C2	8	4	3.8507918070034	-3.30481099947413		RPS19BP1	9	5	4.86236631376304	3.6579526676325		RGS10	10	6	-2.35008132951699	2.56853301958124		SHQ1	11
ADAMTS18	1	1	-2.5136212159916	-1.06461548670252		BSG	2	1	1.59404587251701	4.97182774678747		GALK1	3	1	3.33011042577781	2.97004920379202		FBXO31	4	1	4.05553566915549	1.4294062866358		PCDHAC1	6	3	14.7533212850765	3.79520332948248		SLC9A8	8	4	3.87710201246299	-3.2713537202688		RTN4R	9	5	4.90351688367881	3.59216666356604		RRP12	10	6	-2.57356107728921	2.66929631070177		SLC25A26	11
ADAMTS2	1	1	-3.5828031350895	-1.59286403521021		BTBD2	2	1	1.64073591930427	4.99671220914404		GFER	3	1	2.92697345716514	5.05853510037939		FHOD1	4	1	3.77580058080711	1.38100421563665		PCDHAC2	6	3	14.7617994497494	3.80393648282568		SRC	8	4	3.78803932172813	-3.27214002474268		SBF1	9	5	4.80954300863303	3.48832345143835		SFXN3	10	6	-2.53837740915261	2.53035920993368		SNRK	11
ADAMTS5	1	1	-3.131189708881	-1.10275006159266		BTBD9	2	1	2.29302846891441	2.01741165057699		GIT1	3	1	2.62544893724479	3.10296356812994		FNBP1	4	1	2.77217018110313	0.27377438680212		PLOD3	6	3	6.19241582853355	1.70499920980017		SS18L1	8	4	3.84049641592063	-3.29396247728785		SFI1	9	5	4.93932401639976	3.57164073125402		SGMS1	10	6	-2.46236789720498	2.59505362943689		STT3B	11
ADAMTS6	1	1	-3.338052158527	-1.57754039629419		C12orf49	2	1	0.877127769120113	1.89507424966375		GLYR1	3	1	2.95543777448692	5.09364986554663		FTO	4	1	4.02303730947532	1.37752258912603		PNPLA8	6	3	6.28765880567588	1.61700642243902		STK35	8	4	3.78231846792258	-3.19555997713526		SH3BP1	9	5	4.90385686857261	3.57128548757116		SGPL1	10	6	-2.52981412904702	2.59209934011976		SUCLG2	11
ADAMTS7	1	1	-3.20706356065713	-0.983924625954228		C19orf47	2	1	-0.190167074374779	5.14581418172399		GNA13	3	1	3.07336341840781	3.16822445527594		FXN	4	1	2.68562173349418	0.266322852530879		POR	6	3	6.2244912336544	1.6694831861643		STK4	8	4	3.88220631582298	-3.34355735643824		SLC25A1	9	5	4.82025157911338	3.56301331655065		SH3PXD2A	10	6	-2.43220246332131	2.21361856297533		SUMF1	11
ADAMTS8	1	1	-2.35252249734841	-2.45295572145899		C19orf57	2	1	1.46362483007468	4.05572700635473		GOSR2	3	1	2.87822234136619	3.08766561881582		GABBR1	4	1	2.97413908941306	1.43586641685049		PRKAG2	6	3	6.32722770673789	1.59386968747656		TAF4	8	4	3.81318079931297	-3.26184034212549		SLC35E4	9	5	4.9231086919979	3.54433953897039		SIRT1	10	6	-2.4129885484501	2.55853042141478		TBC1D5	11
ADAMTS9	1	1	-2.34662688272439	-0.676527975639897		C1orf159	2	1	-0.0895934154316024	3.46759724751989		GRB2	3	1	3.15433752042808	3.0509256137995		GALNS	4	1	4.01160108549155	1.36052477494757		PRKRIP1	6	3	6.21598493558921	1.71838361159841		TASP1	8	4	3.72386300069846	-3.19935750826319		SMARCB1	9	5	4.8636866758541	3.65091776982824		STK32C	10	6	-2.54818213479958	2.62202845648806		TEX264	11
ADAMTSL1	1	1	-2.97032368677102	-1.3979189382406		C21orf58	2	1	1.5739151786045	3.51162135736029		GTF3C1	3	1	3.02004873258628	5.19578838483374		GALT	4	1	2.74720644456901	0.736340404906673		RHBDD2	6	3	6.20308315259971	1.67964208261053		TCFL5	8	4	3.83003437025108	-3.27898502214869		SREBF2	9	5	4.84384762746848	3.53212976590673		SUFU	10	6	-2.51214063661538	2.58434654907267		TGFBR2	11
ADAMTSL2	1	1	-3.087639217548	-1.28523206575831		C2CD2	2	1	1.01077436161794	3.10138988629858		HCFC1R1	3	1	3.00495779020347	5.10036349431555		GARNL3	4	1	2.89731692773856	0.349985600867671		SLC12A9	6	3	6.19931709272422	1.7015449418215		TMEM189	8	4	3.85658180219688	-3.31960487230738		TBC1D10A	9	5	4.88658034307517	3.56645202771704		TACC2	10	6	-2.45215929048501	2.59574403003733		TRAK1	11
ADAMTSL3	1	1	-2.47615612047158	-1.93431663378199		C6orf89	2	1	2.29531788332023	1.99631244079153		HEATR6	3	1	3.07992040617027	3.12511420384924		GAS8	4	1	3.9230734060482	1.38972604409735		SLC25A13	6	3	6.2155162046627	1.66864365474264		TOP1	8	4	3.86810647947349	-3.32225179537256		TBC1D22A	9	5	4.88280832273521	3.52731132642309		TCF7L2	10	6	-2.40460503595315	2.55074442312996		TREX1	11
ADAMTSL4	1	1	0.0422649930194779	-0.571773289284306		CALM3	2	1	0.034362788029091	5.00500822202246		HELZ	3	1	3.09000217420615	3.13139736787359		GFOD2	4	1	3.88564478857078	1.4215321554331		SLC37A3	6	3	6.28442584974326	1.65254157916586		TP53INP2	8	4	3.98327004415549	-3.49353217943628		TCF20	9	5	4.86732804281272	3.52560854093115		TET1	10	6	-2.33596194284402	2.47848334298412		UBE2E1	11
ADAMTSL5	1	1	-0.154187565021141	-2.63897609575708		CAMTA1	2	1	-0.0463544775768355	3.376147688785		HEXIM2	3	1	2.49230133993186	4.08662009374182		GLG1	4	1	3.99070822698631	1.37214195863287		SLC4A2	6	3	6.26839696867026	1.63424796000997		TPD52L2	8	4	3.82818185789146	-3.282648085198		TEF	9	5	4.84025704366721	3.54493975774328		TRIM8	10	6	-2.53062379854165	2.57913036779444		ULK4	11
ADAP1	1	1	-0.0291317750736312	-0.851557015022832		CAPN12	2	1	-0.197856788806541	4.96264028684179		HGS	3	1	3.32938467962302	3.01522314683477		GNAQ	4	1	2.74893426401176	0.225528718390865		SMURF1	6	3	6.19358789426841	1.67394405738394		TRPC4AP	8	4	3.85401641828574	-3.30901479586084		TMEM184B	9	5	4.93288242322959	3.61134791509191		TSPAN14	10	6	-2.52350128190957	2.66238388554136		VGLL4	11
ADARB1	1	1	-0.00192994373284139	0.741324426093501		CAPZA1	2	1	-0.0378068138881759	3.14444923535864		IFT140	3	1	2.97988640768089	5.10080647603552		GOLGA2	4	1	2.75302636129417	0.220186234870357		SND1	6	3	6.31214248640098	1.6124284280924		UBE2V1	8	4	3.87694131834068	-3.33672046526392		TNRC6B	9	5	4.87951266271629	3.48112940923254		TUBGCP2	10	6	-2.48939288156472	2.63712322846929		VHL	11
ADARB2	1	1	-1.06789315240823	-1.7417225824209		CAPZB	2	1	-0.130042438678368	3.36265713111441		IQCK	3	1	2.99605857831992	5.13945579663794		GPR107	4	1	2.78866874677695	0.263044120231075		SRPK2	6	3	6.22559368116416	1.60598456994574		UCKL1	8	4	3.82054626447715	-3.27369212969263		TOM1	9	5	4.89079009992637	3.57332122460882		UBTD1	10	6	-2.59785378473244	2.55400332943479		WDR82	11
ADCY2	1	1	-2.53511798875771	-2.06801843508204		CARM1	2	1	1.41789483530082	4.8078277124552		JMJD8	3	1	2.94848286611594	5.13162160054724		GTF3C5	4	1	2.75849127275504	0.304776908317012		ST7	6	3	6.23350870115318	1.63662183419744		ZFP64	8	4	3.85490047437705	-3.30667638643702		TPST2	9	5	4.92660867673911	3.50273788110296		USP54	10	6	-2.39724457757912	2.52477569268028
ADCY3	1	1	1.24147420627631	0.809543968596858		CASZ1	2	1	0.0573842476085588	2.83520653978865		KIAA0556	3	1	2.99993001920737	5.15026021138708		IL11RA	4	1	2.80688201887168	0.963192583480281		TECPR1	6	3	6.13099681837119	1.73828178779165		ZHX3	8	4	3.87112462026633	-3.30127334459742		TRIOBP	9	5	4.88655912382163	3.55420529977362		VDAC2	10	6	-2.38892448442422	2.69385045901815
ADCY5	1	1	-2.72488654153786	-2.70683431490381		CATSPERG	2	1	0.01146822673835	4.90011859075109		KREMEN2	3	1	2.5930510709957	4.65407991544287		INVS	4	1	2.69231235487022	0.368648768821163		TMUB1	6	3	6.18940412504234	1.68050307170431		ZMYND8	8	4	3.89778744680442	-3.35581111772974		TTC28	9	5	4.66991984350242	3.26999318734686		VTI1A	10	6	-2.40891635911904	2.61706309155504
ADCY7	1	1	1.28714093071975	-2.98728418215235		CC2D1B	2	1	-0.0725158502384261	3.28176987306158		LASP1	3	1	2.55940663320579	3.12626904384176		ITFG1	4	1	4.0532242010311	1.42101454869787		TSC22D4	6	3	6.18391715986289	1.70539748803656		ZNF217	8	4	3.87690507871665	-3.32586431368311		TTLL1	9	5	4.94086420042075	3.56491649285833		WDR37	10	6	-1.8666313936039	2.36455376581232
ADD1	1	1	-0.213245396785362	1.94263452426474		CCDC106	2	1	0.191623563595192	4.80530285970251		LCMT1	3	1	3.05280982954063	5.17991209165136		KANK1	4	1	2.28355049593009	0.016650678077144		TYW1B	6	3	6.26880704862632	1.69445616141836		ZNF335	8	4	3.83778058988609	-3.30248021944483		TXNRD2	9	5	4.82888423902549	3.63775229589025		ZMIZ1	10	6	-2.44958079355202	2.59875616566221
ADD2	1	1	-0.600265150241478	-2.81199931963404		CCDC124	2	1	1.43263199431457	4.80588150159399		LITAF	3	1	2.96542417509116	5.10664510861914		KDM4C	4	1	2.36840056879081	0.0551953329233354		UBE2H	6	3	6.27277719480552	1.62042194739859		ZNF341	8	4	3.90256821615257	-3.36503171785791		ZC3H7B	9	5	4.8865081022457	3.55200636521856		ZNF438	10	6	-2.24270284669839	2.18829682604353
ADHFE1	1	1	-1.83025634782754	-0.241618155083256		CCDC61	2	1	-0.0259670664592818	5.02324533597509		LMF1	3	1	2.60615407926597	5.06132841245214		KIAA0513	4	1	3.9333945463375	1.33795404569189		UBE3C	6	3	6.26878082258262	1.62723916904013		ZNF512B	8	4	3.16168701154746	-2.68641614778956		ZDHHC8	9	5	4.81437479955711	3.607209087768
ADM	1	1	-2.24966419237099	0.524455071845455		CCDC92	2	1	0.85711219412841	2.6597335352091		LRRC45	3	1	3.3422411630825	2.98217243091146		KIAA2026	4	1	2.51048802835502	0.0930452360300249		WDR60	6	3	6.31731187803306	1.61252182857077		ZSWIM3	8	4	3.84436976415672	-3.29839086397608
ADORA1	1	1	-0.414313559703453	-1.52344012125452		CCDC97	2	1	-0.00518501298867025	4.97288561002294		MAP3K3	3	1	3.17058598501243	3.07789039746801		KIFC3	4	1	3.61611139280357	1.26045787469427		WDR91	6	3	6.28657447797813	1.59947890178244
ADORA2A	1	1	0.779557297654526	-2.58328962191065		CCND3	2	1	2.23698091012992	1.96597480908911		MAPK3	3	1	3.13370835287132	5.2478899969248		LCAT	4	1	3.38711416227378	1.28769874707739		ZNF277	6	3	6.2750168989376	1.63724619285147
ADPRHL1	1	1	-2.63140953081094	-3.65376376970728		CCNF	2	1	1.64590894681968	3.47859668866674		MAZ	3	1	3.00794088346519	5.09762835637609		LCN12	4	1	2.54771804315604	0.716453672805232		ZNF775	6	3	6.23647939664878	1.65094417468588
ADRA1B	1	1	-1.31786287324868	-2.01513051851709		CD3EAP	2	1	-0.110785966090782	5.06695580617468		MED24	3	1	2.54998266202964	3.11820006505529		LENG8	4	1	2.99802386266746	1.49422723189871		ZNF862	6	3	6.39003145200767	1.7898844494013
ADRA1D	1	1	-2.04580081003152	-2.20705175264795		CDC14A	2	1	-0.136253957919701	2.91286832229177		METRN	3	1	2.85400902730979	4.93068361417334		LRRC8A	4	1	2.63239383203544	0.188721419730586
AFAP1	1	1	0.399938936062233	0.733698965468807		CDC6	2	1	1.61260091764487	3.50889325276892		MGRN1	3	1	2.99021708471336	5.09453797475378		MAMDC4	4	1	2.77940260870017	0.850080849090022
AFAP1L1	1	1	-3.0792106439396	-0.342766522011357		CDKAL1	2	1	2.28252541524924	1.9588956548361		MLLT6	3	1	2.4868088911251	3.07209301129858		MAN1B1	4	1	2.82101022703208	0.365503789344234
AFAP1L2	1	1	-0.413506512813194	-1.64751863344629		CDKN2C	2	1	1.51497363550224	3.54924357072393		MPV17L	3	1	2.78608941537894	4.86106896535437		MAP1LC3B	4	1	4.01282393438377	1.33052253858129
AFF1	1	1	-0.114328985385521	1.45602369443457		CDT1	2	1	1.57027393085517	3.54923033849279		MRPS23	3	1	3.15525710088767	3.06535965339224		MAPK8IP3	4	1	3.03427683813132	1.65941739217321
AFF2	1	1	-1.74461925523721	-1.27438306673487		CDYL	2	1	2.2568888614849	2.05759021774809		MSL1	3	1	2.49080705148734	3.06965404883902		MAPKAP1	4	1	2.78424441320457	0.267613889136714
AFF3	1	1	-1.20853317277871	-1.10440468653162		CENPA	2	1	1.57044243318595	3.55307102338354		MVP	3	1	2.99109756452598	5.10272050038855		MBTPS1	4	1	4.01487886411704	1.36852336064856
AGAP1	1	1	1.24675523740806	1.41220176354925		CHFR	2	1	0.631248588390724	2.6979934586672		MXRA7	3	1	3.1909059236721	3.01777333156149		MC1R	4	1	3.70262896520652	1.1864726556925
AGAP2	1	1	0.9172785586641	-2.58933067186792		CIC	2	1	0.0162575195506974	4.9688520445017		MYO18A	3	1	2.63990771276511	3.13557899133245		MED27	4	1	2.68265771371879	0.268523932853145
AGBL1	1	1	-2.57889259355508	-3.59482908113916		CIT	2	1	1.52452557785072	3.39219123260061		NAGLU	3	1	2.68345224363364	3.26562249795477		MMP15	4	1	3.89338767034568	1.32479059831182
AGBL4	1	1	-0.819917445354088	-4.31999111040552		CLIC1	2	1	2.21329068643607	1.9915229095606		NDUFB10	3	1	2.92772435648002	5.05968928472082		MRRF	4	1	2.68554567796745	0.258724213996333
AGBL5	1	1	0.943543932117598	1.02819645539801		CLIP1	2	1	0.873411359913723	2.47294110939781		NEK8	3	1	2.55526017648734	3.10130256549398		MSH5	4	1	2.96660959226646	1.45381450788061
AGXT	1	1	-1.21352160470925	-0.0117995725484663		CLSPN	2	1	1.54372369749107	3.50746262208502		NF1	3	1	2.56410169107475	3.14900803700964		MTAP	4	1	2.33364879591026	-0.100425003609257
AHNAK2	1	1	1.01144700003423	-0.96899175508936		CLSTN1	2	1	0.000128264255897625	3.2599350227503		NFE2L1	3	1	3.01475393278159	3.18198484317343		MVD	4	1	3.93413936597862	1.3843520893244
AIF1L	1	1	-0.769280915431602	-1.50664329393824		CNN2	2	1	1.75131606561698	4.76159215108435		NMRAL1	3	1	2.98206388456382	5.11988806859533		MYO15B	4	1	2.97424041730918	1.45215642587225
AIRE	1	1	-0.138483886890037	-1.67088508470972		COPZ1	2	1	0.894875253267662	2.49093865738193		NMT1	3	1	2.78752886755027	3.16196084157507		N4BP1	4	1	4.02377211553611	1.38464164868872
AJAP1	1	1	-1.70305884378396	-0.912842510780888		CORO1C	2	1	0.474816913433449	2.32051000134031		NPLOC4	3	1	3.21406280500449	3.03963166610281		NACC2	4	1	2.70206534368552	0.433627606788082
AK5	1	1	-2.28046906488381	-1.45098805292566		CRADD	2	1	0.832315991349594	2.37491906941812		NSMCE1	3	1	2.95641290647544	5.0606992258219		NANS	4	1	2.70704388124503	0.234649659552974
AK7	1	1	-0.841135387591942	-4.37955283983667		CROCC	2	1	-0.0562411000057296	3.44108867780249		NTHL1	3	1	2.92220353586234	5.03359317914526		NCS1	4	1	2.69764875871696	0.248025657096309
AKAP13	1	1	2.23423706991233	-1.73225068911036		CRTC1	2	1	1.48765015108146	4.86120581761877		NTN3	3	1	2.77517568571128	4.83960056439917		NEK6	4	1	2.76157748205222	0.298648835578365
AKAP6	1	1	-2.5043426801487	-3.01393413408716		CSNK1G2	2	1	1.63312321407356	5.00242519513647		ORAI3	3	1	3.02395808202781	5.01771044866125		NFX1	4	1	2.58656155569114	0.171743155875606
AKNA	1	1	0.968821354858653	-2.514093397698		CSRP2	2	1	0.627782578297035	2.26398690179865		PAQR4	3	1	2.56342505914726	4.61694336072485		NINJ1	4	1	2.82355856401481	0.332123280921382
AKNAD1	1	1	-0.201670890025719	-1.83519935472925		CTDSP2	2	1	0.952767448216753	2.41522187967728		PARN	3	1	3.00253712636985	5.16864347592871		NOTCH1	4	1	2.59725427133598	0.410503150382442
AKR1B1	1	1	-1.15999115007363	0.842362166800899		CTNNBIP1	2	1	0.0638176153377458	3.36535835401098		PCGF2	3	1	2.55583345396079	3.11297512189428		NOXA1	4	1	2.70215939981498	0.711717249312801
AKR1D1	1	1	-1.35861194627724	-0.137882946571904		DAZAP1	2	1	1.61614059907951	4.98607754842321		PCTP	3	1	3.01633607847251	3.23291969434301		NTN5	4	1	2.87336396677055	1.53274005786459
AKT3	1	1	-2.63226306932412	-1.83530664308985		DAZAP2	2	1	0.876529006935732	2.47610439867656		PCYT2	3	1	3.30079400045432	2.94782322780172		NUP93	4	1	3.99267661077537	1.38633430139105
ALCAM	1	1	-1.91152203577004	-2.21975087984522		DBP	2	1	0.0654277156070634	4.89141297475378		PDK2	3	1	2.88539885980643	3.20668321982901		NUTF2	4	1	3.96983420354881	1.34112179414312
ALDH1A1	1	1	-0.717440371684654	-0.648310183128911		DDAH2	2	1	2.30086552602805	1.98665654794256		PGAP3	3	1	2.47057914239921	3.0764068974642		PHF19	4	1	2.54337357980766	0.473225714126033
ALDH1A2	1	1	-1.73396099107705	-0.835970638832646		DDX54	2	1	0.891478328682558	2.55779835716764		PGS1	3	1	3.27629148466148	2.9565548910288		PHF2	4	1	2.71670329076804	0.227137566962642
ALDH1A3	1	1	-0.147898917369469	-0.472687481484013		DEDD2	2	1	-0.0795600463672713	5.05704856053869		PHF12	3	1	2.55570470792808	3.11229777471106		PHKB	4	1	3.97912704450645	1.36229479447882
ALDH1L1	1	1	-0.453107242755516	-0.463218210777836		DEPDC4	2	1	1.10035483045139	2.64439925686399		PHKG2	3	1	2.9827281187252	5.13140463964025		PHPT1	4	1	2.82744764787711	0.339867593207759
ALDH2	1	1	-0.987120275668724	-0.503714560112553		DHRS3	2	1	-0.0995440532489852	2.42472540722172		PIGQ	3	1	2.90423500043906	5.02644658223669		PKN3	4	1	2.55040192110099	0.46506631509344
ALDH3B1	1	1	0.309085244961159	-0.750803230843144		DIAPH3	2	1	1.58500390750922	3.53005600110571		PIP4K2B	3	1	2.55629395944633	3.11450451747457		PLA2G15	4	1	4.06773364049949	1.32024562493841
ALDH4A1	1	1	-0.956738715343101	0.26952576772253		DIP2B	2	1	0.929036481954233	2.49440048024933		PKD1	3	1	2.91296112043418	5.02376842633764		PNPLA7	4	1	2.69936596853294	0.711516858497066
ALDOA	1	1	-2.2528687764927	0.578441144385738		DMPK	2	1	0.0511749933437272	4.85097837583105		PLEKHH3	3	1	2.56774579984702	2.89113822714369		POLA2	4	1	2.2951790044979	0.719728351989192
ALK	1	1	-1.93087494867287	-1.14633226259668		DNAJC16	2	1	0.0231061528400346	3.16338044539968		PLEKHM1	3	1	2.84184026224174	3.10258633033316		POMT1	4	1	2.83308684331931	0.358913661399288
ALKBH3	1	1	3.08478438360252	-0.769936798653203		DNM2	2	1	1.37329786521949	4.72654724256079		PNMT	3	1	2.405435914822	2.99597591296713		PPP6C	4	1	2.75651049119987	0.268635989585323
ALPK2	1	1	-2.32567656534158	-0.652281521401005		DNMT1	2	1	1.51694344980277	4.41778397695105		PPM1D	3	1	3.19004618627586	3.11286264792959		PRDM12	4	1	2.69361149770774	0.228437186637325
ALPK3	1	1	-2.50780237215005	-3.42745637758692		DOT1L	2	1	1.64951472980537	5.04539966718237		PPP1R9B	3	1	2.96444165212669	3.12464273110907		PRRT2	4	1	3.06753813726463	1.4242074503092
ALPL	1	1	-1.66963971155129	-0.607748268684941		DPP9	2	1	1.65946888429679	5.02746462956945		PRKAR1A	3	1	3.08457505209007	3.12718743220846		PTGES2	4	1	2.73488163454093	0.281443120398921
ALS2CL	1	1	0.87759977830209	-0.681103466591435		DTNBP1	2	1	2.30948245031394	2.02027872339765		PRPSAP1	3	1	3.21149503690757	3.00652337209265		PTRH1	4	1	2.77303218347587	0.298221589484615
ALX3	1	1	2.06493019563712	1.47611391679327		DUSP16	2	1	0.83017683280267	2.0774578763632		PRR14	3	1	3.0332914541439	5.12344122067968		QSOX2	4	1	2.78665494424857	0.392163039603633
ALX4	1	1	-0.751189475230797	-1.57827997072657		DUSP22	2	1	2.33112859231986	1.9906730665354		QRICH2	3	1	3.17118584615745	3.05086547271292		RAD23B	4	1	2.69184302789726	0.202039958396358
AMBRA1	1	1	3.03680836660423	-0.751551149925786		DVL1	2	1	-0.0287390400692061	3.44798553124945		RAB11FIP3	3	1	2.92128514749564	5.04163217679541		RALGDS	4	1	2.6771929214672	0.249050380149288
AMMECR1	1	1	0.912753493242042	-1.22030091150721		DYNLL1	2	1	0.773431355781929	2.38543158532063		RAB26	3	1	2.92686330778159	5.08001494542639		RALGPS1	4	1	2.7275338123516	0.304775239386958
AMOT	1	1	-0.81666350858651	-0.796701429924565		E2F1	2	1	1.60941630107917	3.55707514421026		RAB40C	3	1	2.96366869909324	5.09152627126257		RANBP10	4	1	3.90257846815147	1.46093428269903
AMOTL1	1	1	2.82321905595817	-0.522310732445317		E2F2	2	1	1.55302267772712	3.52188873426001		RAB5C	3	1	2.58517276746787	3.11025750772039		RAPGEF1	4	1	2.88907253248252	0.216863395133418
AMPD3	1	1	0.967026286475436	-2.88595390184839		E2F3	2	1	2.25615846616782	2.01598560945074		RABEP2	3	1	2.9088801096157	5.14861393109838		RBL2	4	1	3.97323834402122	1.41177821294348
AMPH	1	1	-2.61990702646218	-1.78186559542139		EBNA1BP2	2	1	-0.060056750945671	3.34765404597799		RARA	3	1	2.51102566225089	3.08382189408819		RGS3	4	1	2.57659637434043	0.195773126044673
AMZ1	1	1	-2.08416355150185	-1.65685367449244		ECH1	2	1	-0.0717762758060531	5.01771116391699		RECQL5	3	1	3.17964970571555	3.06631577149908		RNF38	4	1	2.56289433939018	0.145365001120967
ANGPT4	1	1	-2.62508118646584	-0.452771185478764		ECSIT	2	1	1.43384614092864	4.81949997083227		RHBDF1	3	1	2.95506560308494	5.09965872899572		RSPRY1	4	1	3.89332067472495	1.41237247125189
ANK1	1	1	-2.47435629861794	-3.51771688326319		EEF1G	2	1	0.321332092113869	4.23900520936529		RHBDF2	3	1	3.09795605642356	2.9376192106394		RXRA	4	1	2.82703577978172	0.325599433341426
ANK2	1	1	-2.11228645341836	-1.80621814592798		EFHD2	2	1	-0.247617964915855	3.2901474846987		RNF151	3	1	2.93051456911124	5.02461266652624		SEC16A	4	1	2.77581464750327	0.263894320884151
ANK3	1	1	1.30260064703979	-0.76387905939539		EHMT2	2	1	2.2808660219387	1.99302426115553		RNF40	3	1	2.986255521603	5.1357438577799		SH3GLB2	4	1	2.73575376970329	0.346618892112178
ANKFN1	1	1	-1.07357514398537	-3.27244233950098		EIF3K	2	1	-0.0672870923801497	5.03901839391272		ROGDI	3	1	2.95421921712913	5.11370587483923		SHB	4	1	2.33582663042106	0.157918454566402
ANKH	1	1	0.128846342392342	-0.140761374077397		EIF4G3	2	1	-0.0378338743969039	3.28173333541433		RPS6KB1	3	1	3.09370219213523	3.17954892055075		SLC12A4	4	1	3.74117815000571	1.32916987077276
ANKMY1	1	1	1.25909962756194	1.35074663297216		ELL	2	1	1.51541012031593	4.89983701840918		RPTOR	3	1	3.10753952962913	3.09577077762167		SLC27A4	4	1	2.80425202352561	0.308949471869869
ANKMY2	1	1	1.88626247150459	0.838550211348934		EML2	2	1	-0.0293610741420821	5.04792332784216		SAP30BP	3	1	3.2089711378292	3.04364907876532		SLC9A5	4	1	3.32283699018516	1.46646058694403
ANKRD23	1	1	-2.59445369737588	-3.64988326891382		EPB41	2	1	0.0023374508098527	3.28854972259085		SEC14L1	3	1	3.21864854795493	2.97911423579733		SNAPC4	4	1	2.80915450555839	0.396568061271114
ANKRD29	1	1	-0.318162565402611	-0.873981951317387		EPS15L1	2	1	1.34108176333465	4.72760558263342		SKA2	3	1	2.93739282590903	3.22562623158972		SPG7	4	1	3.97662841779746	1.38295662538092
ANKRD39	1	1	1.10557347042121	1.01521587506811		ERC1	2	1	0.838688875265495	1.90838295356314		SLC25A10	3	1	3.30039107305564	2.92726177112143		SPIN1	4	1	2.77648937208213	0.256098987021846
ANKRD44	1	1	-1.11217701929055	1.53118807212393		ERCC1	2	1	-0.0461982538028792	5.00331306592504		SLC38A10	3	1	3.31651865942039	3.02168041602652		SPIRE2	4	1	3.86339342100181	1.27274406091253
ANKRD55	1	1	0.362621421642677	-2.5728526101919		ERI3	2	1	-0.0620576192661361	3.34250801936666		SLC39A11	3	1	3.14975177747764	2.98698818818609		SPTAN1	4	1	2.41086685163535	0.281921388068599
ANKS1B	1	1	-1.61869037645303	-2.04049968584498		ESYT1	2	1	0.674883658714668	2.10548973218481		SLC9A3R1	3	1	3.20782625181236	2.97770494357626		SSPO	4	1	2.90555786592521	1.11284780637304
ANO1	1	1	0.63401957852401	-1.20577025278528		ETV2	2	1	-0.0387498189731673	5.02776885167639		SLC9A3R2	3	1	2.79472028715171	4.73900461331884		ST3GAL2	4	1	3.97105371458091	1.38483929769079
ANO2	1	1	-2.95803773897134	-0.321697710594731		ETV6	2	1	1.47857617837943	2.11120456592123		SMG1	3	1	2.99771940214195	5.17429828778784		ST6GALNAC4	4	1	2.52715312940635	0.177749396720333
ANO4	1	1	-1.10924208658181	-1.41585707529505		EVI5L	2	1	1.59971987707175	4.96065211431066		SNX29	3	1	2.92150616151847	5.0615046037821		ST6GALNAC6	4	1	2.75599133474387	0.277880908408565
ANO7	1	1	-0.020077114276512	-0.31941842897852		EXOC2	2	1	2.30007862550773	2.010399611154		SPATA20	3	1	2.68319057924308	3.28025227920095		STOM	4	1	2.50077771646537	0.134099484839839
ANO9	1	1	1.32015519840278	-0.591647385201054		EZH2	2	1	1.53552388650932	3.56272995606939		SPHK1	3	1	3.10714447004356	2.89915967122595		STRBP	4	1	2.69929778081931	0.225331546225948
ANP32A	1	1	2.48134898645438	-1.77858686312159		FAF1	2	1	0.00681370002783976	3.46130633489172		SPOP	3	1	3.06252729398765	3.15718013183157		STX1B	4	1	2.94703304273643	1.43268376723806
ANPEP	1	1	-0.99340272443734	0.0625381483225054		FANCE	2	1	2.23923992616691	2.025950194755		SRCAP	3	1	3.00071656209983	5.1496279253153		STXBP1	4	1	2.67488562566795	0.373685361304683
ANTXR1	1	1	-3.23542631166421	-1.69668006761988		FARS2	2	1	2.29742156965293	2.01577636734526		SSH2	3	1	2.55467688543357	3.03444969789068		TBC1D2	4	1	2.25978862745322	-0.0954084382863813
ANTXRL	1	1	-0.116559629611595	-1.36764502390345		FASN	2	1	1.80717962486304	2.59797682003061		STARD3	3	1	2.49097740156211	3.07499551908056		TCF25	4	1	3.97244178754844	1.40625035897772
ANXA2	1	1	1.71258615953483	-1.4327204213949		FBRSL1	2	1	1.0010961468295	2.67675858871023		STRADA	3	1	3.11354314786948	3.06873977319281		TERF2	4	1	4.01839220029868	1.38164961473028
ANXA4	1	1	-0.761574392490013	-0.225057123741704		FBXL14	2	1	0.938197813412251	2.25391934947054		STUB1	3	1	2.89201426012077	5.02074670926611		TJP2	4	1	2.58165513975181	0.112859250464839
ANXA6	1	1	0.18213974935569	-1.96300744875391		FBXO21	2	1	0.883290740378277	2.45470479451994		TAF15	3	1	2.77777564031638	3.14294731751959		TK2	4	1	3.95448219282188	1.36146938935797
AOAH	1	1	1.36527043087043	-3.24618768557032		FBXW8	2	1	0.974907773263828	2.54754436151068		TANC2	3	1	3.00992452604331	2.94591760770361		TMEM8B	4	1	2.90128921968497	0.285698415198726
AOX1	1	1	-1.28364456193887	-0.105813025078374		FCGRT	2	1	0.0207464645580216	4.94929766789953		TBC1D24	3	1	2.8456956098751	4.96216726438085		TPRN	4	1	2.79080652696647	0.366221667685909
AP2A2	1	1	2.91108703119315	-0.786797045311528		FGD6	2	1	0.702659318871872	2.14105713502447		TBCD	3	1	3.29282390577354	3.01072901622335		TRADD	4	1	3.90496432287254	1.45128959552328
APBA1	1	1	-1.15073264139138	-2.16591167314966		FGGY	2	1	0.169282908268349	2.32155995950977		TBL3	3	1	2.91473578912772	5.04642534390966		TRAF2	4	1	2.83311390382804	0.322088481345577
APBA2	1	1	-0.682818775348289	-2.75727176531275		FIZ1	2	1	0.00563728315390788	4.998517514625		TEX14	3	1	3.1045314024166	2.99228584901373		TTLL11	4	1	2.6915322492794	0.435178281226558
APBB1	1	1	-0.391320233516319	-2.83328342302759		FOXJ3	2	1	0.0140132258609696	3.21064281598608		TEX2	3	1	3.19917427999534	3.02185922996084		TTLL3	4	1	2.97912704450645	1.43372285501043
APBB1IP	1	1	1.27466758591689	-3.12760257585962		FOXM1	2	1	1.57026695711173	3.5096714510111		TFAP4	3	1	2.8875954101757	5.06543016568701		TUBB3	4	1	3.58891689283408	1.1401430381922
APBB2	1	1	-0.0903534938617782	1.68843048945944		FOXP4	2	1	2.26408957941093	1.98547229305784		THRA	3	1	2.51428198320426	3.09564161435644		USP10	4	1	4.00320445997276	1.36150539056341
APC2	1	1	-0.555752878360374	-2.72658395632227		FRS2	2	1	0.91187338968374	2.35771539197246		TLCD1	3	1	2.57911121351279	3.06460106507818		USP20	4	1	2.80460702878989	0.335626365104122
APCDD1L	1	1	-1.38575065629922	-1.3668549047323		FRS3	2	1	2.28454946977653	1.96388733521978		TLK2	3	1	3.09669243795432	3.15318274632971		VAC14	4	1	3.98570692045249	1.32082760469
APLF	1	1	0.617547596521752	1.27428364888708		GATAD2A	2	1	1.41817971570052	4.81591558591406		TMEM104	3	1	3.22047841054954	3.01216852799932		VAV2	4	1	2.7315291116909	0.329060317435665
APOC3	1	1	-1.17970002191506	-0.0406422601552778		GDF11	2	1	0.877150720633642	2.33407782898228		TNRC6A	3	1	2.98090016347923	5.16459512845556		WDR27	4	1	3.02456652624168	1.46919649974386
APOE	1	1	1.00573577237882	-3.44238424166163		GNA11	2	1	1.50622689230003	4.53950834409277		TRAP1	3	1	2.8880414913372	5.01086902753393		WDR5	4	1	2.775029415913	0.279011489310665
APOL3	1	1	1.8838522384838	-2.77216386660059		GNB1	2	1	-0.0651013900562362	3.33586073056738		TRIM37	3	1	3.01767408353843	3.14513784781973		WWOX	4	1	3.98839437467612	1.37881755963842
APP	1	1	-2.07593691842995	-0.439105509361821		GNB1L	2	1	1.54014574987449	4.76195645467321		TRIM47	3	1	2.88842832548179	2.81231260434668		WWP2	4	1	4.03351890546836	1.40459418431799
AQP6	1	1	-0.407848005466087	-1.48137020929773		GNG12	2	1	-0.0767440845295028	3.00598359242956		TRIM65	3	1	3.17996680242576	3.07553762332479		ZC3H18	4	1	3.97681533796348	1.36927259103338
AR	1	1	-1.04504454629861	1.23105883733313		GPR153	2	1	-0.000356857947929279	3.30973309413473		TSC2	3	1	2.88032721979179	4.99861192838232		ZCCHC14	4	1	4.00638257963218	1.35349810258429
ARAP2	1	1	-0.287738804988487	1.60417854920904		GPX4	2	1	1.60153978569068	4.979239465156		TSEN54	3	1	3.22982847196616	3.02588170901815		ZDHHC1	4	1	3.69530999166526	1.50202793017904
ARHGAP10	1	1	-0.092746381930931	1.51211214200537		GRAMD1A	2	1	-0.22254992025338	4.85610532895605		TUBD1	3	1	3.13066565496482	3.12949413196127		ZDHHC7	4	1	3.99443256361045	1.37049472466986
ARHGAP15	1	1	1.21424999339141	-2.87236690386255		GYS1	2	1	-0.0334147264286117	5.01306629315893		TXNDC11	3	1	2.99358617765464	5.17949533597509		ZFHX3	4	1	4.01900946599998	1.42867177859823
ARHGAP22	1	1	0.833727943427937	-2.93069410189112		H6PD	2	1	0.0792412708476945	3.09573137895147		UBE2O	3	1	3.22550832731284	3.02246177331488		ZMYND19	4	1	2.79660987360038	0.317074538627071
ARHGAP23	1	1	0.31280952198066	-1.2260348783346		HAUS8	2	1	1.4777003477291	4.47862196103613		UBTF	3	1	2.95392667753257	3.09919703141729		ZNF19	4	1	4.01805388433494	1.38338780538122
ARHGAP24	1	1	-0.993474846057518	-0.71833371981104		HDAC1	2	1	-0.172770981959923	3.21875238553564		UNK	3	1	3.26023065549888	3.01250761882345		ZNRF1	4	1	4.03591024381675	1.41290831700842
ARHGAP25	1	1	1.15654073161639	-2.61468696459253		HDAC7	2	1	0.541908199615852	2.16357922689001		UNKL	3	1	2.91144203645744	5.03909349576513
ARHGAP26	1	1	-0.943581228427513	0.783631326117916		HIP1R	2	1	0.917850705511944	2.49908302859346		USP32	3	1	3.04499589902915	3.15099614993612
ARHGAP27	1	1	1.06035080058135	-1.93068694933374		HIPK1	2	1	0.0165049980358049	2.89485696093122		USP7	3	1	3.00569569570579	5.16918945447485
ARHGAP28	1	1	-1.83992493646584	-0.958603857597905		HIVEP1	2	1	2.03696202737846	2.11928424374144		WDR24	3	1	2.88792311651267	5.02741241590063
ARHGAP31	1	1	-2.9188991834446	-0.439760445198613		HLCS	2	1	1.06692991656818	3.15713894502203		WDR90	3	1	2.84977471334495	4.89328622952978
ARHGAP4	1	1	0.572610820360558	-2.32871341570337		HMGA1	2	1	2.2903498361782	1.98075124756376		WFIKKN1	3	1	2.96055018407859	5.0527679933695
ARHGAP42	1	1	-0.402873401813133	0.703335405745906		HNRNPL	2	1	-0.0385465671344832	4.97194767133276		WIPF2	3	1	2.54789792997398	3.10918426648657
ARHGAP6	1	1	-1.42818582551919	-1.25347971781214		HOOK2	2	1	1.50012450916328	4.88338828221838		XPO6	3	1	3.03918563825645	5.21096277371923
ARHGAP8	1	1	1.2524672995285	-0.719775913796025		HS2ST1	2	1	0.0807692955211564	2.92319834367315		YPEL2	3	1	3.04045879346885	3.14939046041052
ARHGDIG	1	1	-0.590462331943138	-2.81474494799097		HSP90AB1	2	1	2.29485511285819	2.01427504555265		ZNF213	3	1	2.97442900640525	5.10270929471533
ARHGEF10L	1	1	-0.151170735530479	-0.0540783391805464		HSPA8	2	1	0.74120792252578	1.937382520595		ZNF263	3	1	2.96477925283469	5.11541795865576
ARHGEF16	1	1	1.12305363518752	-0.422072647652226		IKZF4	2	1	1.03114415211238	2.6337397410063		ZNF598	3	1	2.91580605012931	5.03462600842993
ARHGEF2	1	1	-1.9826747228428	1.39900446073095		IL4R	2	1	0.678451652355568	2.06885045901815		ZNF652	3	1	3.0263014982418	3.1577513827471
ARHGEF4	1	1	-0.643691783122642	-1.6670703874441		ILF3	2	1	1.44363444549598	4.72931194440405		ZNF747	3	1	2.98567449552573	5.10066127912085
ARHGEF6	1	1	1.17239665491142	-2.97660159929712		IRAK2	2	1	0.637007827587502	1.85069829360525
ARID3B	1	1	2.40650188428916	-1.79950189455469		ITPKC	2	1	-0.268818264178856	4.87440323964636
ARID4B	1	1	-1.9650679876133	1.54997205869238		ITSN1	2	1	0.873714263267891	3.06346833840887
ARL8A	1	1	-1.97744358079873	1.5037322057871		JAK1	2	1	-0.000853185824973957	3.25044328109304
ARMC9	1	1	1.27702831728019	1.0301245464472		JARID2	2	1	2.20670353872337	2.06187439099829
ARNT	1	1	-1.99479783075295	1.50399619475882		KDM2B	2	1	0.974936308987515	2.59953120485823
ARNT2	1	1	1.82445799810447	-1.65698575838526		KDM4B	2	1	1.60007059080161	4.98620128766577
ARNTL	1	1	-1.85953605668984	-2.42023038729151		KEAP1	2	1	1.41566338641204	4.76640987531225
ARRB1	1	1	-2.65478551881753	-0.726341961464482		KIAA0319L	2	1	-0.0618211080356673	3.21680194274466
ARRB2	1	1	1.33168965084113	-3.24760866030176		KIAA0355	2	1	-0.105889206103905	5.06203484670202
ARSB	1	1	-1.66849267976723	0.158037902274532		KIF13A	2	1	2.31312822801627	2.04446691409628
ARSG	1	1	-1.52403724687539	-1.72367954119165		KIF21A	2	1	0.935101638032199	2.42727327481787
ARSI	1	1	-3.24766433732949	-1.8302497850271		KLF16	2	1	1.55263906223335	5.01244545117895
ASAP2	1	1	0.26343732578315	0.42375350133459		KLHL26	2	1	1.30357604724921	4.79096675054113
ASAP3	1	1	0.326797659225838	0.271771432319087		LAMA5	2	1	-0.17700434225045	3.47752809659521
ASCL1	1	1	-1.10083163278542	-2.52583026751001		LDLRAP1	2	1	-0.102241401843651	3.07552379504721
ASPG	1	1	-1.42502320306741	-0.288539408287602		LIG1	2	1	0.0493153880313798	4.93773388997595
ASPH	1	1	-0.95717704790078	0.592419506469173		LIMA1	2	1	0.86605327827491	2.48134593428056
ASRGL1	1	1	-1.77220666902505	-0.709382294258671		LMNB2	2	1	1.59999441606559	4.91739058629553
ASS1	1	1	-1.08242357271157	-0.0200304971547896		LONP1	2	1	1.54912250740089	4.93677735463659
ASTN1	1	1	-1.32519734399758	-2.32386016710718		LRRC8D	2	1	0.135713691540138	3.01240360871832
ASTN2	1	1	-0.935005550555809	-2.06908655031641		LRRC8E	2	1	1.32540553314246	4.29693615571539
ATF2	1	1	-0.837474231891258	1.76674282685797		LSM4	2	1	1.44610142213859	4.81411075727026
ATF6	1	1	-1.9242395211979	1.49002123014013		LSS	2	1	1.7409148166851	2.62752936915438
ATG16L1	1	1	1.16886654002227	1.3801308883814		LTBR	2	1	0.866661938555615	2.26581202582399
ATG9B	1	1	-0.613488798312767	-3.96209764345606		LUZP1	2	1	0.0480632732585832	3.17332035438101
ATOH8	1	1	-1.67424643533669	-1.03735685213526		LYRM4	2	1	2.30922543508567	1.9880310608534
ATP10A	1	1	-2.87726533906899	-1.84192561968287		MAP2K7	2	1	1.47348719341315	4.85307884351294
ATP10B	1	1	0.347220117874519	-0.68003010614832		MAP3K14	2	1	1.92054599029578	2.31234152750055
ATP11C	1	1	0.353129024334328	1.31065309182684		MAP7D1	2	1	-0.0849403192325667	3.40268957749884
ATP1B1	1	1	-0.442383890323265	-0.558900831780034		MAPK14	2	1	2.25179194910087	2.02481424943487
ATP2A1	1	1	-2.56951392190896	-3.63466548784693		MARK4	2	1	-0.146810178928001	5.02327656880896
ATP2A3	1	1	0.429483229942696	-1.04289769991358		MAST2	2	1	-0.150025015048607	3.0878900303034
ATP2B2	1	1	-1.37427294748269	-0.678209065041142		MAST3	2	1	1.32494344813384	4.61978387967627
ATP2B3	1	1	-1.03694487112008	-2.93251085146387		MBOAT7	2	1	0.0626342247203752	4.98417711392919
ATP2B4	1	1	-1.74098670976601	0.607295276084346		MED13L	2	1	0.891362505681889	2.45782377705852
ATP2C2	1	1	0.942513667229639	-0.591623543343144		MED16	2	1	1.65065460903205	5.0231471075205
ATP6V0A4	1	1	-0.192206268481834	-1.27719664438685		MED26	2	1	1.3662955413536	4.71600723401586
ATP6V0D2	1	1	0.684005404539482	-2.90430068834742		MIB2	2	1	-0.0353073527141646	3.47836685315649
ATP6V1B1	1	1	-0.419430976085289	-1.14792156084498		MKNK1	2	1	-0.0669585515781478	3.25933677093069
ATP6V1C2	1	1	-0.370411043338402	-1.31562399729212		MKNK2	2	1	1.61336814863242	5.00826239720861
ATP6V1E2	1	1	0.92383672548093	1.09330535069982		MLLT1	2	1	1.58082788688697	4.94891071454565
ATP8A2	1	1	-1.26142156618081	-1.5566377626272		MLXIP	2	1	0.991631834484713	2.26996944979708
ATP8B1	1	1	1.38712921244659	-0.59831189974268		MON2	2	1	0.861189777679817	2.34955024854223
ATP8B3	1	1	-0.121922497920616	-2.68142795427759		MRPL34	2	1	1.38509594900169	4.78959727422277
ATP8B4	1	1	1.37110006315269	-3.37002038820704		MTHFR	2	1	0.0938218782619401	3.08882951871435
ATP9B	1	1	0.995813048161642	0.376345397391719		MVK	2	1	0.953694127217011	2.55288793281595
ATRNL1	1	1	-1.34440148370705	-1.30487823351343		MXD3	2	1	1.43566426140823	3.51070130006353
AUTS2	1	1	0.411611254043953	-0.613823889336186		MYBL2	2	1	1.62950145704307	3.57899737493078
AVEN	1	1	2.46100425226249	-1.79942035540064		MYO9B	2	1	1.40760632855453	4.67584347859899
AXIN2	1	1	-0.60629916685067	-1.33101892336329		NADK	2	1	-0.142809753589256	3.38604515925924
AXL	1	1	1.42097269994773	-3.30250644548853		NAPA	2	1	-0.0516138722225264	5.07739448682348
B3GALT5	1	1	-0.399822716884239	-0.487607000908452		NCAPD2	2	1	1.4851067016796	3.35766774550955
B4GALNT3	1	1	0.330869848556892	-0.893258331856328		NCOR2	2	1	0.959009908787982	2.60263317958395
B4GALT1	1	1	1.2558715592102	-1.12900805338343		NDUFA11	2	1	1.49269324047126	4.86606502667944
BAALC	1	1	-1.76204956071816	-0.347274063667851		NFIC	2	1	1.42116805417098	4.60728812352697
BACE2	1	1	0.119196111984627	-0.223607061943608		NFIX	2	1	1.3899717281536	4.31906402246038
BACH1	1	1	0.222368771858589	1.48609238997976		NFKBIE	2	1	2.1801967571453	2.05056688324491
BACH2	1	1	0.385425562687294	-2.55486202105005		NFYA	2	1	2.24407755834617	1.99378910795729
BAHCC1	1	1	-0.578253989390953	-0.621556995949345		NIPAL3	2	1	-0.0605756689830855	2.72031572596113
BAHD1	1	1	2.43415188295402	-1.776056288323		NOC2L	2	1	-0.0509436179920272	3.41803491250555
BAIAP2L1	1	1	1.33476328355827	-0.501811264595585		NOSIP	2	1	-0.0668582965656356	5.03798771039526
BAIAP2L2	1	1	-0.740025048427208	0.0764033807901567		NPAS1	2	1	-0.0944807578846053	4.80734753743689
BAIAP3	1	1	-0.957814340762718	-4.34248924120386		NPHP4	2	1	-0.118647937945946	3.37162929908316
BANK1	1	1	0.596511001415627	-2.55320262773951		NQO2	2	1	2.40139185888328	1.87775153056662
BARX2	1	1	-0.0255005409046248	-1.01869416101893		NR1H2	2	1	-0.0363072802349166	5.02052927152197
BASP1	1	1	-1.98068178194009	-1.3468058095785		NR2F6	2	1	1.33383500082053	4.73234629766027
BBS7	1	1	-0.0466181685253219	1.45951587096731		NUP210	2	1	1.56265371543922	3.53951084748785
BBS9	1	1	1.81460993988075	0.843217016616268		OAZ1	2	1	1.56201570732154	4.94818925992529
BCAR3	1	1	-0.634220843486412	0.160888911643428		OMA1	2	1	-0.0884714175983504	3.21191513673346
BCAS1	1	1	0.0820838163570329	-0.59174942835291		OPA3	2	1	-0.0298903633876876	5.08996200696508
BCAS4	1	1	1.28082674247779	-2.3301916108938		OSBPL8	2	1	0.835303160078899	2.23885089293997
BCAT1	1	1	0.867158266432659	-3.28904533251246		OSBPL9	2	1	-0.115757827930076	3.34104222194235
BCL11A	1	1	0.449161256380455	-1.35699844225367		PA2G4	2	1	0.789297709889786	2.48700004578511
BCL11B	1	1	0.845635215468781	-2.38340949877222		PAK4	2	1	-0.133560781650169	5.12343144551794
BCL2	1	1	0.809093410797493	0.182179929175777		PARK7	2	1	-0.124977712802513	3.3772189034609
BCL2L14	1	1	0.856832924015896	-1.00556826456507		PCNT	2	1	1.04390867305555	3.24606615439932
BCL6	1	1	-2.63035452859841	-0.0205914960714155		PEX11G	2	1	2.07248436910667	4.65023565427343
BCL9	1	1	-1.93652141588174	1.4250037683634		PEX14	2	1	-0.15313971536599	3.36626643077414
BDKRB2	1	1	-2.59437668817483	-0.166794060310917		PFKL	2	1	1.22353451950111	3.03046339885275
BEGAIN	1	1	-0.544897203616722	-2.79344034059961		PGPEP1	2	1	1.12396157784023	4.32762694493811
BEST1	1	1	-2.22493231790505	-1.99964523180445		PHB2	2	1	1.05427319807567	2.46763227642457
BFSP1	1	1	-0.393061642818077	0.707652331748409		PHC2	2	1	-0.0901362945362166	3.32780969277899
BFSP2	1	1	0.651856566496269	-2.48682355745752		PHLDB3	2	1	-0.0786783744617537	4.96898174420874
BGN	1	1	-3.43044984834634	-1.37262892588099		PIAS4	2	1	1.58048194152869	4.92004013196508
BICC1	1	1	-2.97399533288918	-1.57736205919703		PIK3R2	2	1	1.33966460330047	4.72283244267981
BICD1	1	1	-0.629194383792503	1.44607651368658		PIP5K1C	2	1	1.58291941387214	4.95690536634008
BIK	1	1	1.22163247568168	-0.677014826378422		PITPNM2	2	1	1.00034499792017	2.57522231475393
BIN1	1	1	-2.47102916734658	-3.40543222292383		PKMYT1	2	1	1.63252311450996	3.57208919660131
BIRC6	1	1	0.91346430470802	1.34308278695623		PKN1	2	1	1.22548466426887	4.60083603993933
BIRC7	1	1	-2.20234239595376	-1.9059710489126		PLCXD1	2	1	1.62762224180259	3.43421995774786
BLVRA	1	1	1.91404485208549	0.789211036124629		PLEKHA5	2	1	0.740071694083588	2.10977405444662
BMF	1	1	2.41038429243125	-1.62247276171167		PLEKHG5	2	1	-0.139038090877159	3.32014602557699
BMP4	1	1	-0.579843049220665	-1.21397685869654		PLEKHJ1	2	1	1.59037655097999	4.99320030347387
BMP5	1	1	-1.89581645029031	-1.00867724283655		PLEKHM2	2	1	-0.0633643914981917	3.33543825284521
BMP7	1	1	-0.864214067630394	-1.72538184984644		PLOD1	2	1	-0.369114046268089	2.64865383640806
BMP8A	1	1	-3.10268152254067	-1.65301990374048		PNKP	2	1	-0.0694819738193587	5.07789468900244
BMPER	1	1	-1.81671441095315	-1.96733903749903		POC1A	2	1	1.62183397514381	3.4726933254389
BMPR1B	1	1	-1.49760425584756	-1.73353099688013		POLD1	2	1	0.0371831606105729	5.01677537099401
BNC2	1	1	-3.05387390153847	-1.85418557985743		POMGNT1	2	1	-0.0402461339756087	3.28272110358755
BOC	1	1	-2.41579282777749	-1.23500084742029		PPARD	2	1	2.27008974058189	2.05267465249578
BOK	1	1	-0.243327026538475	-2.04708099230249		PPHLN1	2	1	0.843541498012917	2.48402987555544
BOLA1	1	1	-1.96554673212014	1.49602109328787		PPIE	2	1	-0.0935190965457992	3.35311764613668
BPI	1	1	-0.352354173831566	-1.02810668810328		PPP1R12C	2	1	-0.0303126622959212	5.01248622075598
BRS3	1	1	-1.0505331804081	-2.75152253969629		PPP1R13L	2	1	-0.0769294549747542	5.00874996320288
BRSK2	1	1	-0.685449605159386	-2.73990583284815		PPP5C	2	1	-0.0812830974384383	5.0918841375498
BSN	1	1	-0.848573928050621	-2.99599599703272		PRDM15	2	1	1.08461980027713	3.42027717963736
BTBD11	1	1	-0.974774007968529	0.645256282248897		PRDM2	2	1	0.0154700825885697	3.23796451226751
BTBD16	1	1	0.148236269779579	-2.21897411211451		PRDX2	2	1	1.44549798471488	4.84192800656835
BZW2	1	1	1.83320700628318	0.842260004439754		PRIM2	2	1	2.14391195280112	1.9875819100527
C10orf90	1	1	-1.94596660631142	-1.44058346613367		PRKCZ	2	1	0.00490593416251384	3.27569139138739
C11orf49	1	1	2.90803455812492	-0.733734129509526		PRMT1	2	1	-0.0969783117099837	5.07802462712805
C12orf75	1	1	-0.626008873157127	-0.00912546976526318		PRPF40B	2	1	0.95482872677602	2.56657694415132
C14orf132	1	1	-2.0435751725956	-2.25842332704981		PRR7	2	1	0.758424873180763	4.42867851392309
C14orf180	1	1	-2.32975996034585	-0.929431198677617		PSMD9	2	1	0.886349177636282	2.4912854148535
C15orf41	1	1	2.22506558401145	-1.93245506151636		PSMG4	2	1	2.34473394853629	1.95018303529303
C16orf74	1	1	-0.491018061809166	0.397308350959224		PSRC1	2	1	1.50555997592963	3.48106765882055
C17orf64	1	1	-0.0562905718608931	-2.44486999376734		PTBP1	2	1	1.60902201635398	4.96635961667578
C17orf67	1	1	1.4590727041439	0.42520260945837		PTK7	2	1	2.04841827852287	1.94831740991156
C17orf82	1	1	-2.40249002473794	-0.444393156609135		PTP4A2	2	1	-0.0640553285404281	3.31378150121252
C17orf99	1	1	-0.120409493617638	-1.74454355104883		PTTG1	2	1	1.53458827240028	3.53779459134619
C18orf25	1	1	1.01464370144166	0.344286204734249		PUM1	2	1	0.0341874311641618	3.13275677100698
C19orf33	1	1	1.1569242577032	-0.757455109200078		PUSL1	2	1	-0.0583434750362471	3.43461501733343
C1orf105	1	1	-2.5803457547947	-3.65724944933374		PVR	2	1	-0.0225062419696883	5.05366420880835
C1orf127	1	1	-0.97372806566201	-2.7155060754629		PXN	2	1	0.873129005260841	2.53107603774349
C1orf198	1	1	-1.88371003168069	1.5014864815859		R3HDM2	2	1	0.853691178090946	2.47318367049972
C1orf21	1	1	0.0245110343173905	-0.296336172661381		RAB3D	2	1	1.35966670019187	4.48800158635656
C1QTNF1	1	1	-3.35479343431435	-1.53691410883387		RAD51	2	1	1.57970833284415	3.5098346485285
C1QTNF6	1	1	-3.65503871934853	-1.43638062342127		RAD52	2	1	1.16332141561069	2.28192694620172
C1QTNF7	1	1	-3.00340188043557	-1.43556475504358		RANBP3	2	1	1.55302023393668	4.90459370748083
C2	1	1	1.35298528773345	-3.20134830339869		RAP1A	2	1	-0.0757564355655745	3.11671674386541
C22orf34	1	1	0.924168901234941	-2.93973636492212		RARG	2	1	0.595363761015312	2.13100546733419
C2CD4C	1	1	-0.498131756953819	-2.9148821817251		RASSF8	2	1	0.629238213129418	1.99722662703077
C2CD4D	1	1	-0.062220578364952	-2.00007915361841		RBM19	2	1	0.786051611132996	2.39756600321214
C2orf88	1	1	-1.7853497316166	-0.993448732933598		RBMX	2	1	0.0888737390712663	4.1431581987528
C3orf52	1	1	0.0325832317546769	0.220091821113033		RCC2	2	1	0.115412647552864	3.4239421500353
C3orf67	1	1	-0.945731883220299	-4.08776616915186		RERE	2	1	-0.0208267618938521	3.26692295209448
C4orf19	1	1	-0.819648032359703	-0.615644930443364		REXO1	2	1	1.64306711656608	5.01735615865271
C4orf36	1	1	-0.0565191556736068	1.38862431184332		RFX1	2	1	1.48746829731025	4.9012582315592
C4orf50	1	1	0.670249427385704	-2.37177944048365		RIC8B	2	1	0.952280998878257	2.47400432215015
C6orf132	1	1	1.23333286745109	-0.750946281990605		RILPL1	2	1	0.919436408855097	2.61770258978884
C7orf50	1	1	1.90395086509742	0.835055591025752		RNF220	2	1	-0.066568141154869	3.33257252112905
C8G	1	1	-1.25048530595742	-0.0481505380483442		RNFT2	2	1	1.09074797732391	2.78192249075453
C8orf34	1	1	-0.840930109195335	-4.35801219805201		RPL13	2	1	0.318616564102547	4.30672192708532
C9orf139	1	1	1.2628517995552	-2.85557174547632		RPL22	2	1	0.185485775299446	3.97092473641912
CA10	1	1	-1.22272694604836	-1.87912368639429		RPL23A	2	1	0.300968999691383	4.24195897714178
CA11	1	1	-0.036150877647026	-2.90303325518091		RPL28	2	1	0.192815716095345	4.50439262525122
CA12	1	1	-0.467982177905662	0.0487730516580767		RPL3	2	1	0.321317369766609	4.23449373380224
CA4	1	1	-2.45195830362283	-0.566350935539799		RPL36	2	1	0.342323179073708	4.30166816846411
CA5B	1	1	0.259759540386574	1.13204896585028		RPS2	2	1	0.333710605926888	4.28715849057714
CABLES1	1	1	-2.02581131952248	-1.88355970247706		RPS6KA1	2	1	-0.0644784023090438	3.14617580310385
CACHD1	1	1	-1.30877221124612	-0.77889370783289		RPS9	2	1	0.3158345769123	4.29632961885015
CACNA1A	1	1	-1.03535306947671	-2.95332193239649		RSBN1	2	1	0.0808806966022416	2.93215412036459
CACNA1B	1	1	-0.775179391078575	-2.90060233934839		RUVBL2	2	1	-0.0870281507297591	5.09103679791967
CACNA1C	1	1	-2.94778478639565	-2.57012987001856		RXRB	2	1	2.27999257547416	1.99874386326353
CACNA1D	1	1	-0.181432728938682	0.299150945105953		SAE1	2	1	-0.0123966981693343	5.07145834104101
CACNA1E	1	1	-1.31884897249184	-0.674134253105717		SARS2	2	1	-0.130877976588829	5.13375711576025
CACNA1G	1	1	-2.35659134881936	-1.47018980844935		SBNO2	2	1	1.61382573349036	4.95799970761816
CACNA1H	1	1	-2.88322937982522	-2.60221290453394		SCAMP4	2	1	1.65389954549827	4.95398593083898
CACNA1I	1	1	-0.594238524608238	-2.04516124590357		SCARB1	2	1	1.1556348602251	2.35063184932749
CACNA1S	1	1	-2.5717324067875	-3.6338968263479		SCD	2	1	1.60197388631858	2.31508835540096
CACNA2D1	1	1	-2.2929238130375	-1.8220415101858		SERTAD3	2	1	-0.260948066882713	4.83694625035803
CACNA2D2	1	1	-1.2105377961918	-1.64736413820704		SF3A2	2	1	1.61478924257316	4.98596978322546
CACNA2D3	1	1	-1.2440260698124	-1.48311710222681		SH3GL1	2	1	1.57243644697227	4.96500826016943
CACNA2D4	1	1	1.36841606599845	-3.20242357119043		SHMT2	2	1	0.66210373742141	2.18719785050432
CACNB2	1	1	-2.83349431055032	-2.59215307100733		SIPA1L3	2	1	-0.0528456618114547	5.00206470624487
CACNG2	1	1	-1.22678030031167	-3.02701139315088		SKI	2	1	0.016150171585457	3.25289577380697
CACNG4	1	1	-1.58294046419106	-1.82439231737574		SLC11A2	2	1	0.961362539507525	2.34550497070829
CACNG8	1	1	-1.04077196615182	-2.80039977892359		SLC19A1	2	1	1.58649670583762	2.76501569286863
CADM1	1	1	-1.59580004709206	-1.31193113192041		SLC27A1	2	1	1.27595313889541	4.61977028981726
CADM2	1	1	-1.65895283716164	-2.55009078844507		SLC29A1	2	1	2.2808717439846	2.00388229028265
CADPS	1	1	-1.15057123201333	-2.61597823961695		SLC2A13	2	1	0.785447339244263	2.11396330730001
CADPS2	1	1	-0.230771904162987	0.135523082175655		SLC39A7	2	1	2.19940852624931	1.90403872863333
CALCB	1	1	-1.08256495492898	-2.38030958040674		SLC44A2	2	1	0.258120889492409	2.33437768504898
CALD1	1	1	-2.97749102609597	-2.53135061129053		SLC9A1	2	1	0.113497073479073	3.10718661681692
CALML5	1	1	0.543497915096657	-1.28141641481836		SMARCC2	2	1	0.972021585978644	2.56702424720804
CALN1	1	1	-1.40875161188088	-2.53323554857691		SMUG1	2	1	0.8877494658307	2.52608307585995
CAMK1D	1	1	-0.446604018382652	-1.25632238253077		SOD2	2	1	1.73491209251441	2.1569213880686
CAMK2A	1	1	-2.52468479173623	-3.32757139070948		SP1	2	1	0.832580777533428	2.40479350597541
CAMK2B	1	1	-2.44299662607156	-3.57710027559717		SPC24	2	1	1.59025811655082	3.51583767072241
CAMK2D	1	1	-0.0944697906299666	1.36508333817999		SPEN	2	1	0.0192069361881181	3.20173990861456
CAND2	1	1	-0.369205479793175	-2.95613956316431		SPHK2	2	1	0.0172008226589128	4.99448013440649
CAP2	1	1	-2.64810240762673	-2.87327480181177		SPPL2B	2	1	1.66514396173515	4.97870946065466
CAPG	1	1	0.89636191231765	-1.9712524400564		SPPL3	2	1	0.955576105691568	2.54513875530044
CAPN13	1	1	0.328933234043495	-0.519599913200932		SPSB2	2	1	0.908618655704038	2.34642160818855
CAPN2	1	1	-2.15239012735329	1.28948545590918		SRF	2	1	2.19268953306236	1.91267317668478
CAPN5	1	1	-0.142262344531639	-0.328173159203129		SRRM5	2	1	0.0300280998424455	4.93866491452734
CARD10	1	1	-0.706180100612266	0.37750220433752		SSBP3	2	1	-0.0433759738727645	3.31463074819128
CARD11	1	1	0.892730767555611	-2.29670810564478		SSBP4	2	1	1.64395522577323	5.04887652532141
CARD9	1	1	1.34469195706405	-3.18532800539454		SSH1	2	1	0.979534255988972	2.52932893619816
CARNS1	1	1	-0.168124323062523	-2.11991309984644		SSU72	2	1	-0.0765594293399886	3.39542776481192
CASQ2	1	1	-2.68788230913125	-2.96504068239649		ST3GAL3	2	1	-0.0816466857715682	3.34058988229315
CASS4	1	1	1.26059945923843	-3.19629621370752		STAT3	2	1	1.80799471838035	2.290937618771
CAV2	1	1	-2.42442214982949	-0.422607897362309		STAT6	2	1	0.756944249101059	2.32818877831976
CAV3	1	1	-2.6088520337864	-3.67842578752955		STK11	2	1	1.6319949577526	5.00290227071325
CBFA2T3	1	1	0.764486903973	-2.51245593889673		STK40	2	1	-0.00506520765267171	3.26409703628103
CBR4	1	1	-0.0247128059192733	1.58767378465216		STMN1	2	1	1.33418490988769	3.52902603284399
CC2D2A	1	1	-0.87602663534127	-4.18945979937037		STRN4	2	1	-0.0716657687946395	5.05989670888464
CCBE1	1	1	-1.53829825418435	-1.25668668611963		STX10	2	1	1.42456635338821	4.71412110463659
CCDC102B	1	1	-3.08458984392129	-0.403922556480961		STX2	2	1	1.00503617031135	2.41087706894557
CCDC114	1	1	-0.874687318973167	-4.32561921938379		SUPT3H	2	1	2.30514716608085	1.98088118568937
CCDC13	1	1	-0.882192616633995	-4.30474614962061		SYMPK	2	1	-0.0476582695766524	5.0853927148966
CCDC148	1	1	-0.628444557361229	-4.20326995714624		TACC3	2	1	1.5586991260723	3.49993121758978
CCDC151	1	1	-0.937679891757591	-4.27264451845606		TAOK3	2	1	0.910094211526291	2.51061791316549
CCDC155	1	1	0.00989770395316325	-2.30603551729639		TAPBP	2	1	2.18784260255851	2.0011873556761
CCDC3	1	1	-2.84487116830788	-0.883102892479497		TARBP2	2	1	0.898399258680718	2.46958289802949
CCDC33	1	1	-0.906208162479027	-4.33957338198145		TBC1D22B	2	1	2.25153207284965	1.9894332005171
CCDC40	1	1	-0.67908740537606	-4.49799632891138		TCF3	2	1	1.61564456922569	4.93499493733923
CCDC69	1	1	0.909842951871531	-2.57398843630274		TEAD2	2	1	-0.293490057162865	4.65266299382727
CCDC80	1	1	-3.1827958871647	-1.6791644082876		TEAD3	2	1	2.20123314363517	1.90831506387274
CCDC88B	1	1	1.03705298406638	-2.27662753923853		TECR	2	1	1.40452062589683	4.75361347333471
CCDC88C	1	1	0.727752561397926	-2.43314075334986		TESK2	2	1	-0.225995307139976	3.02358788386862
CCDC93	1	1	1.43443849188842	1.4715342535166		TFEB	2	1	2.26353764040031	1.97390702501814
CCM2	1	1	1.88978898031272	0.801580192008418		THOP1	2	1	1.64458667737998	5.01135635510961
CCND1	1	1	0.868725242741482	-1.23793053492029		TIMM50	2	1	-0.10353136556588	5.07494425908606
CCND2	1	1	0.395689184494392	-1.9872026429983		TJAP1	2	1	2.30713998777427	1.97775542871038
CCNG2	1	1	0.0331929872707292	1.48395991460363		TK1	2	1	1.63350635273017	3.51507163182775
CCNJL	1	1	0.0660815785602494	-0.990941046318608		TMBIM6	2	1	0.849211866684334	2.44460979239027
CCR10	1	1	0.371448869533913	-2.27767133577784		TMCO4	2	1	-0.101576452426536	3.21143567697088
CD101	1	1	1.21441187960662	-2.92083644731958		TMEM117	2	1	0.78263470036544	2.39393257857243
CD109	1	1	0.996521084286348	-0.856914995750981		TMEM120B	2	1	1.08781380457439	2.34863232211153
CD151	1	1	2.68287002546348	-0.81529188021143		TMEM205	2	1	1.32628157240905	4.58923530713598
CD247	1	1	1.04952336353816	-2.55645036562403		TMEM53	2	1	-0.117865805797203	3.34442657367269
CD248	1	1	-3.34162176149331	-1.14071035250147		TMEM63B	2	1	2.28104066354789	1.99325740472357
CD276	1	1	2.38772785169639	-1.82637786730249		TMTC2	2	1	-0.0345189620777205	2.40649887495617
CD36	1	1	-2.51892054574929	-0.705776451668339		TMTC3	2	1	0.857617917187588	2.39237110824267
CD4	1	1	1.31031485898055	-3.27276325090845		TNFAIP2	2	1	1.50605964166679	2.04049420491735
CD44	1	1	0.202794248886482	0.0571174635080522		TNFRSF1A	2	1	0.866386654503719	2.26919916407148
CD59	1	1	2.74485265714683	-0.776418446144658		TNPO2	2	1	1.42843842012443	4.79403400556127
CD6	1	1	0.989710814036505	-2.52207755907496		TP73	2	1	1.57903998596229	3.47783458367865
CD81	1	1	2.61892353994407	-0.847552059731083		TPCN1	2	1	1.0743842224554	2.3031583963422
CD82	1	1	0.470926756687538	-1.40429925783594		TRAM2	2	1	2.20956277353324	1.99230706826727
CD8B	1	1	1.10430351895847	-2.54256248339136		TRAPPC3	2	1	-0.114663009814842	3.36424785987417
CD9	1	1	1.11649533612289	-0.458838938316899		TRIM33	2	1	0.0629218767360612	2.91320866481344
CD96	1	1	1.08010108274974	-2.5493364320608		TRIM62	2	1	-0.146977548770531	3.07475268975775
CDC42BPA	1	1	-2.06932795541726	1.53453493253271		TRIP10	2	1	1.56177067262687	4.90347433225195
CDC42BPG	1	1	1.26238423091926	-0.69496774538477		TRPM4	2	1	0.0472025225833818	4.92445230618994
CDC42EP3	1	1	-2.41681516664468	-2.48708724840601		TSPAN31	2	1	0.900834223903792	2.51020286367218
CDC42EP5	1	1	0.213786299057381	-0.646384953102666		TUBA1C	2	1	1.4142888735012	3.34785169498007
CDCA7L	1	1	1.79396497709312	0.721005917945308		U2AF1L4	2	1	-0.064786439113243	5.0269894613413
CDH1	1	1	1.37629648549117	-0.53943681581934		U2AF2	2	1	-0.103820686511619	5.09794211522619
CDH10	1	1	-1.30063379304848	-2.70006227358301		UBE4B	2	1	-0.0113775779529647	3.26166302100698
CDH12	1	1	-1.84494340913735	-2.94331741198023		ULK1	2	1	0.931942409087048	2.53206674889605
CDH13	1	1	-3.21825349824868	-0.688681601128178		UNG	2	1	1.0339907358364	2.6573592139868
CDH15	1	1	-2.52485859888039	-3.64292955263575		UPF1	2	1	1.3956400702671	4.79421448842565
CDH17	1	1	-0.561193471126182	-0.587709663948613		USF2	2	1	-0.0835496236606673	5.05212402478735
CDH18	1	1	-1.8488639642521	-2.94299316271265		VASP	2	1	-0.126405720882042	4.98754930631201
CDH2	1	1	-2.58752835290871	-1.47607183321436		VMAC	2	1	1.72135239345588	4.90612888471167
CDH20	1	1	-1.84038150804482	-2.55988597734888		VPS13D	2	1	0.0431757519916459	3.06231391564886
CDH22	1	1	-1.21161735551797	-2.79143428667505		VWA1	2	1	-0.121225838832481	2.69177848235647
CDH23	1	1	-0.697349195651634	-1.56501936777552		WDR18	2	1	1.61892342073478	4.98796105519812
CDH3	1	1	0.442511792011635	-0.817034958443242		WDTC1	2	1	-0.0225079705043868	3.25540602342169
CDH4	1	1	-1.73806250589333	-2.46932840212305		WIZ	2	1	1.40080111724891	4.79064107076208
CDH5	1	1	-3.07218063371621	-0.313193319878178		YIF1B	2	1	-0.0475796510501937	5.0498542799143
CDH7	1	1	-1.23491395013772	-1.93911647661646		ZBTB17	2	1	-0.0578024436756209	3.40888726846258
CDH8	1	1	-1.90668857591592	-3.06127881868799		ZBTB40	2	1	0.0992263506130143	3.10843253270666
CDHR2	1	1	-0.846323971919639	0.00989556447545947		ZBTB45	2	1	0.0377447555736466	4.9692730917124
CDHR3	1	1	-0.904169922046287	-4.38201427324732		ZBTB7A	2	1	1.58925824863471	4.96628332273046
CDHR5	1	1	-0.854803209476097	0.0407755388406938		ZC3H10	2	1	0.882802149929182	2.49672377989571
CDK14	1	1	-2.77587211626015	-1.73535585268457		ZC3H4	2	1	-0.0307588626667098	5.02024293080847
CDK15	1	1	-2.40709364908181	-2.01054572924097		ZDHHC18	2	1	-0.0825625707431868	3.31855881349127
CDK16	1	1	0.438903177805321	1.58362007276098		ZFAND3	2	1	2.27782356245078	1.99338179961721
CDK18	1	1	-0.652302866153343	-2.01388740404566		ZMYM6	2	1	0.0138406704143449	3.16175913945715
CDK6	1	1	-0.814798240832909	-0.917539356789189		ZNF362	2	1	-0.0607651521488265	3.34313535825293
CDKN1C	1	1	-2.15417874353371	-0.907283066353398		ZNF382	2	1	0.65788682801284	3.58247208730261
CDKN2A	1	1	1.92662018043555	-0.207572220406132		ZNF415	2	1	0.664648945160286	3.58307027951757
CDON	1	1	-1.64582884805642	-1.85900306566675		ZNF444	2	1	0.0461547325328752	4.97290039197485
CDX1	1	1	-0.332274561099632	-0.701743839821416		ZNF526	2	1	-0.0548420597835616	5.01264143125097
CDX2	1	1	-0.456257586650474	-0.6226994977804		ZNF552	2	1	0.115301842518227	4.23925864831488
CDYL2	1	1	-1.14217794435464	1.48962229625265		ZNF581	2	1	0.187955553360359	4.51853037015478
CEBPA	1	1	0.771950016446488	-2.77381038530787		ZNF586	2	1	0.173492963142769	4.23481297627966
CEBPZ	1	1	0.916873364426272	1.24726832047979		ZNF627	2	1	1.38350542885818	4.65579581395666
CECR2	1	1	0.625328506060021	0.598567129531307		ZNF628	2	1	0.157838876076119	4.72231435910742
CELF2	1	1	0.991790144421236	-2.42128515108545		ZNF653	2	1	1.43323349458732	4.81830835477392
CELF4	1	1	-1.20430887239419	-2.98377227648218		ZNF787	2	1	0.0838724325374528	4.90966129437963
CELF5	1	1	-0.0406602074428634	-2.78894519670923
CELSR1	1	1	1.00616430742301	-1.04751849039515
CELSR2	1	1	0.100418801136391	-0.153282879433232
CELSR3	1	1	-0.632079248599632	-2.85082578524073
CEP72	1	1	1.72744416696586	1.19244051114599
CERCAM	1	1	-3.50766790407143	-1.59670543535669
CERKL	1	1	-0.823471670322044	-4.38346719606836
CFD	1	1	-2.25211155908547	-0.963195322594243
CFLAR	1	1	0.934253065098153	1.44968456164877
CFTR	1	1	-0.416122441463097	-0.332728861412602
CGA	1	1	-0.985314374141319	-2.290207384667
CGB5	1	1	0.367664809055702	-1.11709475382288
CGN	1	1	1.42878257734336	-0.395979641518193
CGNL1	1	1	0.448194469042198	-1.69071912630518
CHD2	1	1	2.3526296566204	-1.83625268801172
CHD5	1	1	-0.828117137126549	-2.74395608766993
CHI3L2	1	1	0.14116268856086	-0.020871876320439
CHID1	1	1	2.97781574232139	-0.774261473259526
CHIT1	1	1	0.993148981310503	-3.42307710512598
CHN1	1	1	-3.08263052003823	-1.40358948572596
CHN2	1	1	-0.335113649539574	-0.43723225458582
CHRM1	1	1	0.0752522896007463	-0.190719841560917
CHRM3	1	1	-1.89070308702431	-2.97568416460474
CHRM5	1	1	0.0699916432575151	-2.38104009493311
CHRNA4	1	1	-1.54297888772927	-0.795769451698857
CHRNA7	1	1	-0.492806677989586	-0.689255713066655
CHRNB4	1	1	-0.56766915815316	-2.17562103136499
CHST11	1	1	-0.979329233340843	-0.944770334801274
CHST12	1	1	1.98367428285636	0.917842031875057
CHST15	1	1	-0.805768137149437	-1.66119003160914
CHST8	1	1	-0.683021550349815	-2.81171464785059
CHST9	1	1	-0.967552428416832	-1.03734350069483
CHSY1	1	1	2.28436326486625	-1.87217664583643
CHSY3	1	1	-3.59078872697793	-1.48837900026758
CIB2	1	1	2.26096140844382	-1.89802360399683
CIB4	1	1	-1.63874686258279	-1.87431859835108
CIITA	1	1	1.58664583665885	-2.95902538164576
CILP2	1	1	-3.43727005022012	-1.64586782320459
CKB	1	1	-1.01530862348519	-1.72355985506495
CLASP1	1	1	0.973421710260288	1.34950578347723
CLCN3	1	1	-0.0753327657505111	1.49628532067816
CLCNKA	1	1	-0.828805093936546	-1.4819478975149
CLDN11	1	1	-1.06662476556741	-2.17291784151514
CLDN14	1	1	-0.94270623224221	-0.37908959253748
CLDN4	1	1	1.38779595000304	-0.567702530464726
CLDN6	1	1	-0.12867773073159	-2.0456137643667
CLDN9	1	1	-0.0579459716602401	-2.09910631044825
CLIC4	1	1	-2.76420367258034	-2.21677636965235
CLIC5	1	1	-0.329703097514732	-0.983318089088994
CLIC6	1	1	-1.56509387987099	-0.588183163246708
CLIP2	1	1	-1.02147996919595	-1.13395142420252
CLK3	1	1	2.38612853986778	-1.91522264345606
CLN6	1	1	2.35041236383476	-1.87415838106592
CLOCK	1	1	-1.08492863672219	1.75347560779135
CLSTN2	1	1	-1.54942143457375	-1.28607916696985
CLVS1	1	1	-0.369613175563438	1.23069095746557
CMKLR1	1	1	1.2775124858097	-3.39279365404566
CMTM7	1	1	-0.390414004497154	-0.335439919075566
CNBD1	1	1	-1.7803608228489	-2.97441911562403
CNGB1	1	1	-0.0949273158832625	-1.6972889886709
CNGB3	1	1	-1.8868860055729	-3.04469585283716
CNIH3	1	1	-1.38301074998818	-1.02787566050013
CNNM1	1	1	-0.618647818736656	-2.23255538805445
CNNM3	1	1	1.04841867340364	1.08940684930365
CNNM4	1	1	1.33345213038482	-0.436590908608037
CNPY1	1	1	-1.02455664174996	-2.68917131288965
CNST	1	1	-1.99196208017312	1.51280701295416
CNTFR	1	1	-1.37783897417031	-1.53065705164393
CNTN1	1	1	-2.00697553651772	-2.24835014208277
CNTN4	1	1	-2.50806916254006	-1.60288476808985
CNTN5	1	1	-1.78218496339761	-2.65964603289087
CNTNAP1	1	1	-0.465057735614403	-3.17629051073511
CNTNAP2	1	1	-0.745335226230247	-1.57145905359705
CNTNAP5	1	1	-1.73684824006997	-2.93335437639673
COBL	1	1	1.60837625963248	-0.383501528343754
COBLL1	1	1	-1.65289605157815	0.112703563132686
COL12A1	1	1	-3.52245605485879	-1.49643492563685
COL13A1	1	1	-0.307652239970787	-0.757539032539921
COL15A1	1	1	-3.13647115724526	-0.869533060631352
COL16A1	1	1	-3.4319824029728	-1.51049184664209
COL18A1	1	1	-3.20625103013955	-0.732886074623662
COL1A1	1	1	-3.54880416887246	-1.53957867487391
COL20A1	1	1	-1.54522860544167	-2.6994452463003
COL21A1	1	1	-1.61906278627358	-3.5912270532461
COL22A1	1	1	-0.689691548518761	-1.63671445711573
COL23A1	1	1	-1.57137954729043	-1.02495026453455
COL24A1	1	1	-3.54146707551919	-1.46534442766626
COL25A1	1	1	-2.77951443689309	-0.506682633003789
COL27A1	1	1	0.605499679870979	-1.84686803682764
COL28A1	1	1	-1.84462869661294	-3.08618593080957
COL2A1	1	1	-0.85180902975045	-1.7925004945608
COL4A1	1	1	-3.15487182634316	-0.677649019798833
COL4A2	1	1	-3.13155687349282	-0.716763495049077
COL4A6	1	1	0.185180957146065	-1.11816310747583
COL5A1	1	1	-3.57073438661538	-1.46079707010706
COL5A3	1	1	-3.37522018449746	-1.27358054979761
COL6A1	1	1	-3.42297781007729	-1.48034095629175
COL6A3	1	1	-3.48945415513955	-1.54296207292994
COL7A1	1	1	0.423621530361549	-1.11414646967371
COL8A1	1	1	-3.35229862230263	-1.67253923281153
COL8A2	1	1	-3.3564847757145	-1.74741983278711
COL9A3	1	1	-1.3939067174717	-1.90716409548243
COLEC12	1	1	0.815564940400498	-3.2539410577627
COMMD1	1	1	0.854959557481186	1.18072724477331
CORO1A	1	1	1.07497205836333	-2.57193803652247
CORO2A	1	1	1.9634318302349	-0.519281385979252
CORO2B	1	1	-2.17980516450845	-1.67396497591456
COX19	1	1	1.88032698137321	0.828552843490047
CPA5	1	1	0.721323932237999	-2.54523324831446
CPA6	1	1	-1.62617934244118	-1.43154096468409
CPAMD8	1	1	-0.0760529090686873	-1.44017577036341
CPE	1	1	-1.55120385187112	-0.0507585988851362
CPEB1	1	1	-0.584741120509727	-2.24131822451075
CPEB2	1	1	-0.177423124484642	1.80379241839926
CPLX1	1	1	-0.427256827525719	-2.71198415621241
CPLX2	1	1	-1.15691268938027	-2.74463415010889
CPNE4	1	1	-1.6227885534092	-2.19281959398706
CPNE5	1	1	0.573664481468575	-2.5278840051504
CPNE7	1	1	-0.824583177737816	-2.51139592989405
CPPED1	1	1	0.989542650707142	-3.22371387346705
CPS1	1	1	-1.11741006868325	-0.307207821449833
CPVL	1	1	1.02381219220914	-3.37387561663111
CPXM2	1	1	-2.89587414758645	-1.62581348284205
CPZ	1	1	-3.22310054796181	-1.59179735048731
CRABP2	1	1	0.558577323980705	-1.19225025042017
CRB1	1	1	-1.57317317026101	-2.69282388552149
CRB2	1	1	-0.609943156413658	-1.21741151674707
CREB1	1	1	1.02624819678821	1.49224698678533
CREB3L1	1	1	-3.49826801317178	-1.46360206469019
CREB5	1	1	-1.95280254381142	-1.04521250589808
CRHR2	1	1	-1.9861291696354	-3.16332101686915
CRIM1	1	1	0.321956271953957	0.283740760245723
CRIP1	1	1	1.47183274728812	-1.15298843248804
CRIP2	1	1	1.53883200389899	-1.17605924471338
CRISPLD2	1	1	-3.43994701402627	-1.5253021703573
CRLF1	1	1	-1.51305163400613	-2.12200975283106
CRMP1	1	1	-0.674147253207786	-2.3453283296438
CRTAC1	1	1	-1.59573209779702	-1.26001548632105
CRTC3	1	1	2.30770885450401	-1.84683465822657
CRYGN	1	1	-2.38069427507363	-1.59626149996241
CRYM	1	1	-0.564831023387535	-0.436195133766728
CSDC2	1	1	-2.98228753107034	-1.88090610369165
CSF1R	1	1	1.32458978397407	-3.3246984468313
CSGALNACT1	1	1	-1.29260004060708	-1.21051382883509
CSH1	1	1	-0.87852919595681	-2.27182674272974
CSK	1	1	2.32948171598472	-1.83409070833643
CSMD1	1	1	-1.89462173479043	-2.8522977815481
CSMD2	1	1	-3.32704580324136	-1.35596895082911
CSMD3	1	1	-1.94734538095437	-2.8552856431814
CSNK1G1	1	1	2.3783373783306	-1.85828828676661
CSPG4	1	1	-3.03779852884255	-0.850961445412236
CSRP1	1	1	-2.84913504617654	-2.61312770708521
CSTB	1	1	0.685630793400185	-1.27049517496546
CT62	1	1	-0.459109788112266	0.0382602228311724
CTBP1	1	1	-0.220850591830833	1.907393158832
CTCFL	1	1	-0.104910020999535	-2.16890525682886
CTDP1	1	1	0.971809643037693	0.337340117850704
CTDSP1	1	1	1.29109814269103	1.47847408191244
CTF1	1	1	0.233233446903603	-2.3701896653982
CTNNA2	1	1	-1.24944770830117	-2.19651460512598
CTNNA3	1	1	-2.65558827417336	-3.01916980608423
CTNND2	1	1	-1.20267355936013	-2.59379911287745
CTSD	1	1	0.940938628926949	-3.45771169527491
CTTNBP2	1	1	-1.00353825586282	-1.20255231722315
CUBN	1	1	-1.46603024499856	-0.524065970024663
CUX2	1	1	-0.201957945994957	-0.360988377174931
CX3CL1	1	1	-0.474564676456077	-0.791851996025639
CXCL12	1	1	-3.05639184015237	-1.52947974070032
CYB561D1	1	1	1.82688539726295	1.51374566690008
CYB5A	1	1	0.229449326820747	0.227428676047725
CYB5R1	1	1	-2.04066479700051	1.42115724221746
CYFIP1	1	1	2.38045072061576	-1.8289389596792
CYFIP2	1	1	0.842599208183663	-2.28768968447168
CYGB	1	1	-2.83364379899941	-0.707261322578984
CYP11A1	1	1	-0.0661083509250716	-0.48382592066248
CYP19A1	1	1	0.557761157579796	-3.31900358065088
CYP1B1	1	1	-2.93717825906716	-1.56034374102076
CYP26B1	1	1	-1.32070172327004	-1.06731200083216
CYS1	1	1	-2.79295528428994	-1.59487962587793
CYTH3	1	1	1.74302756292381	0.705001236358089
CYTH4	1	1	1.35303017003097	-3.18627309664209
D2HGDH	1	1	1.54064833623924	1.41501009599249
DAAM2	1	1	-2.82879150407754	-2.19314718111475
DAB1	1	1	-1.40713418024026	-1.66589212282618
DACH1	1	1	-1.47323024766885	-1.12227749689539
DACT3	1	1	-2.89534366624795	-2.47942352159937
DAGLB	1	1	1.87902110321082	0.842723847785396
DAP	1	1	1.47373103601493	1.0241431011347
DAPK1	1	1	-0.513102894000633	-0.0624132142873579
DAPK2	1	1	1.67154991132774	-1.10921501978357
DBH	1	1	-1.41861236589394	-0.392829893669682
DCC	1	1	-1.56020153062783	-1.84147786959131
DCDC1	1	1	-0.805445079974754	-4.35321807726343
DCDC2	1	1	-0.078824525050743	-0.175599096855717
DCHS1	1	1	-3.16661727922402	-1.07132768495997
DCHS2	1	1	-1.37211049097024	-1.99059533937891
DCLK1	1	1	-1.38254702585183	-2.1799778924795
DCLK2	1	1	-2.70349276559792	-2.17346811159571
DCTD	1	1	0.0217187355235978	1.61268687383215
DDAH1	1	1	1.51528316242255	-0.413963554939824
DDB2	1	1	0.791728387303726	-0.344563244423466
DDC	1	1	-0.947919969730003	-0.00285529955347119
DDIT3	1	1	0.235082323379891	0.810226799407405
DDR2	1	1	-2.88249457376443	-1.96017646654566
DDX59	1	1	-2.01953542726479	1.41243028775732
DDX60L	1	1	1.95826804143943	-2.7791604982229
DEAF1	1	1	2.91490327817954	-0.750022171578007
DEC1	1	1	-0.139340644054039	-1.12506604059656
DEGS2	1	1	1.21258031827964	-0.68777608736475
DENND1B	1	1	-1.35109293954812	1.70969694987814
DENND2A	1	1	-2.54924190538369	-0.858845232567387
DENND5B	1	1	-0.898245577983482	-0.0236785398336226
DGAT2	1	1	0.383678908176796	-1.52337407930811
DGKB	1	1	-1.69919693963967	-2.87885188921412
DGKD	1	1	1.35479720932998	1.39877951280157
DGKE	1	1	1.45052670938529	0.656105281272334
DGKG	1	1	-1.11127269762002	0.71636140481512
DGKH	1	1	-1.24089110391579	1.77486384049932
DGKI	1	1	-1.76513231294595	-1.88252353533228
DGKQ	1	1	-0.203342800311668	1.85569697753469
DGKZ	1	1	2.95955240232505	-0.8169293390127
DHRSX	1	1	0.290072793789284	1.31798780099432
DIAPH2	1	1	0.143844182320015	1.07021784917395
DIS3L2	1	1	1.20835837227859	1.40747022763769
DISC1	1	1	-1.875574474506	-0.190825699410039
DIXDC1	1	1	-2.87551343934975	-2.59547996386011
DKK2	1	1	-3.26780403154336	-1.61143541201075
DKK3	1	1	-2.96206176774941	-1.41017675264795
DLC1	1	1	-2.22262013452493	-0.863747118553715
DLEC1	1	1	-0.79525852697335	-4.3248171792837
DLEU7	1	1	1.15977431339778	-3.30882453783472
DLG2	1	1	-1.71362793939553	-2.02833556993921
DLG4	1	1	-0.391088133029564	-3.22881889208277
DLGAP1	1	1	-1.69263065355263	-1.39121365412195
DLGAP2	1	1	-1.73569238679848	-1.79255962236841
DLL1	1	1	-2.51616371171914	0.143915177741451
DLL3	1	1	-0.183789615802391	-2.7385978685232
DLX1	1	1	-0.985236888103111	-1.8202629075857
DLX2	1	1	-0.884419446162804	-1.804216860375
DLX3	1	1	0.240598852463142	-1.38891267641504
DLX4	1	1	-0.331889038257225	-1.83332157000025
DMD	1	1	-2.50841320054971	-2.72508954866846
DMRT1	1	1	-0.754482155017479	-2.16659164293726
DMXL2	1	1	2.4001115511135	-1.91580533846338
DNAH11	1	1	-1.12806356447182	-4.01524734362085
DNAH17	1	1	-0.232026939563377	-1.69228362902124
DNAH2	1	1	-0.776205425433739	-4.27864980562647
DNAH3	1	1	-0.878743891887291	-4.34650468691309
DNAH9	1	1	-0.818997864894493	-4.34296941622217
DNAI1	1	1	-0.821778063945396	-4.41302299364527
DNAJC1	1	1	-0.750260954074486	0.779862166800899
DNAJC17	1	1	2.43368243677177	-1.80443525179346
DNAJC5B	1	1	1.06406208378829	-3.37579727037867
DNAJC6	1	1	-0.603426580600365	-2.60496473177393
DNASE1	1	1	-0.766593580417259	-1.51474690302332
DNER	1	1	-1.03674757974587	-2.27701330049952
DNM1	1	1	-1.02561510103188	-2.78008746965845
DNM3	1	1	-1.69323957460366	-1.78625821932276
DNMT3A	1	1	0.84238062305011	1.06944739953558
DNPEP	1	1	1.25903629762687	1.44488901034872
DNTT	1	1	-1.51490986841164	-1.91096448763331
DOC2B	1	1	-2.32633841531716	-1.32707452639063
DOCK10	1	1	1.26257633668937	-3.02054643495997
DOCK11	1	1	2.0660268018917	0.516108991065425
DOCK2	1	1	1.26217606169738	-3.03409576281031
DOCK3	1	1	-1.49712646501504	-2.24039029940088
DOCK4	1	1	1.11539463204898	-3.189790247521
DOCK6	1	1	-3.12609422700845	-0.362187861046391
DOCK8	1	1	1.15674469871082	-2.90649318560083
DOK1	1	1	0.599728162117378	-2.46307325228174
DOK3	1	1	1.27867051465072	-3.1307229982229
DOK4	1	1	-0.832209711246117	0.0430057062296099
DOK5	1	1	-3.00212181108437	-1.8692917810293
DOK6	1	1	-2.77001750963174	-1.69394731386622
DOK7	1	1	0.118780727215187	-0.942358969292241
DPEP1	1	1	-0.93447185056649	-0.418588636955815
DPF3	1	1	-1.14616644876443	0.0388095392374224
DPP10	1	1	-1.22608984010659	-1.99030303820093
DPP6	1	1	-1.57677662866555	-2.55201768740137
DPY19L1	1	1	1.66014730436362	0.560326577582759
DPYD	1	1	1.17254325253524	-3.07231998308619
DPYS	1	1	-1.28179681795083	-0.164304731926518
DPYSL5	1	1	-0.903994803599937	-2.71689224108179
DRAM1	1	1	-1.79451931016885	-0.0770659433217817
DRD1	1	1	-1.27653611200295	-2.50656461580713
DRGX	1	1	-0.497296815089805	-1.67794799669703
DSCAM	1	1	-1.2600663949772	-2.66672038896998
DSCAML1	1	1	-1.56805718439065	-2.47376108034571
DSP	1	1	1.24853783351936	-0.735283135017949
DST	1	1	0.190187091656105	-1.1223640428396
DTNA	1	1	-2.01733387010537	-2.36934518679102
DTNB	1	1	0.853061767943279	1.04012155667822
DTX1	1	1	-0.713003521136864	-1.08835577829798
DUOX1	1	1	-0.604943995647056	-1.68748140200098
DUSP15	1	1	-0.302547221355064	-2.64015197618921
DUSP27	1	1	-2.60005581872903	-3.62262105806788
DUSP28	1	1	1.2391227732376	1.42438793317358
DYM	1	1	1.00358020765342	0.390965224662227
DYNC1I1	1	1	-1.82881415384255	-2.98230457170923
DYRK3	1	1	-2.07859957712136	1.42046558991949
DYSF	1	1	-3.02465475099526	-0.428577660164433
EBF1	1	1	-2.94181788461648	-0.857071159920292
EBF2	1	1	-2.80139863985024	-0.959692476830083
EBF3	1	1	-2.5952600290104	-1.01573109491785
ECE1	1	1	-2.35115635889016	-0.657648562035161
EDA	1	1	-0.619122510127647	0.126080991187496
EDAR	1	1	0.206925327606575	-1.32948493822535
EDARADD	1	1	0.0473111818508073	-1.40598058565577
EDIL3	1	1	-2.92186058061562	-1.42355418070276
EDN2	1	1	0.738534773416893	-0.665395973763066
EDN3	1	1	-1.41894948976479	-1.86435127123316
EDNRB	1	1	-2.73517525690041	-0.508524416527348
EEF1A2	1	1	-0.578652386836632	-2.83420753344019
EEPD1	1	1	-0.926530246905907	-0.0726211057515913
EFCAB2	1	1	-1.5960232068821	0.803367854514522
EFCAB6	1	1	-0.666772012881859	-4.4543690667959
EFHC1	1	1	-0.733039741687401	-4.46387672289331
EFHD1	1	1	-0.579465871028526	-0.958787201485234
EFNA1	1	1	-1.94444191949807	1.43073797360937
EFNA3	1	1	0.00434183580435954	-2.26136779650171
EFNA5	1	1	-1.10990131395303	-0.5900747762533
EFNB1	1	1	-0.586510663203819	0.1329317106394
EFR3B	1	1	0.0365186880306169	-2.3157987581106
EFS	1	1	0.169590229816811	-1.05047082766016
EGFL7	1	1	-2.96838987367593	-0.221748112282353
EGFLAM	1	1	-3.00053632753335	-0.804264782509404
EGFR	1	1	-1.95142448442422	-2.37257766588648
EGLN3	1	1	-2.25665152566872	0.527103783049983
EHBP1	1	1	0.916821854837315	1.23351550237219
EHD2	1	1	-2.51515400903664	-0.374322174629765
EHD3	1	1	0.11822133762397	-1.20236658915003
EHD4	1	1	2.30293726427116	-1.7894430147024
EHF	1	1	1.03137769056119	-0.563277004799443
EIF4E1B	1	1	-1.05105186002694	-3.00480270250757
ELF2	1	1	0.0112708757594987	1.57189095155279
ELF3	1	1	1.4041236291603	-0.569494246086674
ELF4	1	1	1.06215850514926	-1.98921918734034
ELFN1	1	1	-3.00270975130044	-0.607492445549565
ELFN2	1	1	-1.51070559518777	-2.27750396593531
ELK1	1	1	0.385343665905373	1.69385725394766
ELK3	1	1	-0.981703763179405	1.87732863561193
ELMO1	1	1	-2.06421721475564	-2.4626960740896
ELMO3	1	1	1.29670243961372	-0.675978182396489
ELN	1	1	-3.10460317628823	-1.45688819750269
ELOVL6	1	1	-0.0301402856632308	1.66596162454168
EMCN	1	1	-3.03525984781228	-0.444133041939335
EMID1	1	1	-0.640459661655052	-2.29282998903711
EMILIN2	1	1	0.987838181383984	-3.35998630388697
EML1	1	1	-0.651631837062462	-3.00881337984522
EML6	1	1	0.754061336346047	-0.568463562569218
EMP2	1	1	0.342892284222023	-1.31113123758753
EMP3	1	1	0.803539211578743	-1.48790931566675
EMX1	1	1	-0.865668301753624	-1.59276199205835
EMX2	1	1	-1.49463451402627	-0.857707975945073
ENAH	1	1	-1.76627076166116	1.41048395768682
ENC1	1	1	-0.897680645160301	-2.69790363176783
ENDOD1	1	1	0.416276748009102	-0.0993456827016646
ENDOU	1	1	0.713424334950821	-1.34896492823084
ENG	1	1	-3.10370100038491	-0.372608898720341
ENO2	1	1	-2.24954689043008	0.583400012412471
ENO3	1	1	-2.53438103692971	-3.616388319573
ENOX1	1	1	-2.69275415437661	-1.8542394624563
ENPEP	1	1	-2.64909160631142	-0.544579027733403
ENPP6	1	1	-0.834819321803673	-1.53342366083582
ENTPD2	1	1	0.353287513084786	-0.537808416924077
ENTPD8	1	1	0.254212672539131	-0.548805712303715
EPAS1	1	1	-2.7695604612156	-0.0700533376546675
EPB41L3	1	1	1.12503958744563	-3.25142574175318
EPB41L4B	1	1	1.42412879569091	-0.896501539787846
EPB41L5	1	1	0.534864927359001	0.794944526114864
EPC1	1	1	-1.41589177148782	2.19432518021147
EPDR1	1	1	-0.923555736713035	-1.27529454096277
EPHA3	1	1	-3.09087980287514	-1.01192211969812
EPHA4	1	1	-2.0197087575718	-0.393259047112065
EPHA6	1	1	-1.84792459505044	-2.16136646135767
EPHA8	1	1	-0.730968599490745	-2.62341976030787
EPHB1	1	1	-1.42846477525674	-1.99758434160669
EPHB2	1	1	-0.486651067905052	-1.18975543840845
EPHB3	1	1	-0.065814738444908	-0.312638996681767
EPHX1	1	1	-1.20531094568215	0.877207042136592
EPN3	1	1	1.22082742554702	-0.721548079094487
EPPK1	1	1	1.2314637551979	-0.562794445595341
EPS8	1	1	-0.820104961566551	0.59331202642004
EPS8L1	1	1	1.24287706119575	-0.800663469872075
EPS8L2	1	1	1.63022475940742	-0.65212106569727
ERBB3	1	1	0.938056521624082	-0.0338284955831343
ERBB4	1	1	-1.15118659036599	-1.30167221888025
ERC2	1	1	-1.40469849603616	-1.56872534616907
ERG	1	1	-1.02647984521828	-1.61506223543604
ERN1	1	1	-0.977535371951683	1.69082385436575
ESPN	1	1	-0.943195109538658	0.0349817289499468
ESPNL	1	1	0.339456791706459	-1.99697875841578
ESR1	1	1	-1.31563938157998	-0.789710520348149
ESRP1	1	1	1.17626524967708	-0.601663826546269
ESRRB	1	1	-0.88091218965493	-1.51086306436976
ESRRG	1	1	-0.897506241969688	-0.787665842613774
ESYT3	1	1	-0.315983061961754	-1.82179689272364
ETFA	1	1	2.41976868612327	-1.8207979188772
ETHE1	1	1	0.196176106758492	-0.706425665459233
ETNK2	1	1	-1.08836162584267	-0.075371740898686
ETS1	1	1	-2.5313578893467	-0.162031172356206
ETV1	1	1	-1.77738941209756	-1.31145810945948
ETV4	1	1	-0.626991038493736	-0.682861326775151
ETV5	1	1	-0.738183145694359	-0.646751879295903
EVC2	1	1	0.334218079872505	-1.88240051134546
EVL	1	1	0.50436293584861	-2.3937959657522
EVPL	1	1	1.24176233512916	-0.815206049522954
EXOC3L2	1	1	-3.04149067895852	-0.350470303139287
EXOC6B	1	1	-0.953728323154076	1.74916619197409
EXPH5	1	1	-0.262618665866478	-1.19724178179224
EXT2	1	1	3.00388514501609	-0.782158850273686
EXTL1	1	1	-2.3407262613102	-1.57800912722071
EYA1	1	1	-2.04123628633462	-2.76526784761866
EYA2	1	1	-1.27717721956216	-0.999077795586186
EYA4	1	1	-1.77355969446145	-2.51008605822046
EYS	1	1	-1.52660072343789	-0.159145592293339
FA2H	1	1	0.117259318657295	-0.614801643929082
FADS1	1	1	3.00665461523093	-0.400022743782597
FADS2	1	1	2.97208034498252	-0.355918882927495
FADS3	1	1	-1.24717152612649	0.312921048560542
FAM107A	1	1	-2.31706989305459	-0.650552986702519
FAM107B	1	1	-0.138687853984459	-0.736018894753056
FAM110A	1	1	0.779673496909515	-0.648834942421513
FAM110B	1	1	-1.81165636079751	-1.14308953150232
FAM126A	1	1	1.66285800439872	0.610169173636836
FAM131C	1	1	-0.375104313068016	-0.415346859535771
FAM13A	1	1	-0.486140256099327	0.546331168570918
FAM155A	1	1	-2.53316438692055	-1.81071472032984
FAM160A1	1	1	1.32610544068374	-0.65520477159937
FAM163A	1	1	-1.53224480646096	-1.786385534844
FAM167A	1	1	-0.423747544459923	-1.08244752748926
FAM168A	1	1	-0.906578307323082	1.70598954097311
FAM169B	1	1	-0.774615769557579	-0.196346996864873
FAM171A1	1	1	-0.857970123462303	-1.10333394869288
FAM174B	1	1	0.360746378727333	-0.0480558858724409
FAM178B	1	1	-0.799217229060753	-2.00219154222925
FAM184A	1	1	-0.33083427446328	-2.07193660601099
FAM189A1	1	1	-1.43191922204934	-1.72289657457789
FAM189A2	1	1	-1.76671398179971	-1.66511201723536
FAM189B	1	1	-1.97321737306557	1.51813781396429
FAM193A	1	1	-0.243600731067284	1.94183498755972
FAM20A	1	1	-1.95854890840493	-1.26532745226343
FAM20C	1	1	-1.75114501016579	-1.0554273115011
FAM43A	1	1	-1.55498350160561	-0.977820871910649
FAM47E	1	1	-0.787177329234703	-4.38658857210596
FAM49A	1	1	1.00639303279676	-3.19355916841944
FAM53A	1	1	-0.174980168513878	1.88193655149023
FAM53B	1	1	1.70795005065955	1.51264614001791
FAM83B	1	1	0.757941762633698	-0.792749165138798
FAM83E	1	1	0.519175226517098	-0.649721144280034
FAM83F	1	1	1.23784285289802	-0.740002392372685
FAM9B	1	1	-1.37520802514993	-0.25505566462
FAR2	1	1	-0.388622288875206	-0.782581089577275
FARP2	1	1	1.22846415144958	1.48637604848425
FAT1	1	1	-0.637564306430443	-0.195992468437749
FAT3	1	1	-2.02103817956887	-2.31769132479151
FBLIM1	1	1	-1.62064826982461	0.223674060264034
FBLN1	1	1	-2.91282904642068	-1.45901536806543
FBLN2	1	1	-3.37776124971352	-1.59856080873926
FBLN5	1	1	-3.00964367883645	-1.34651970728357
FBN1	1	1	-3.41900384920083	-1.61199807985743
FBN2	1	1	-1.63752663629494	-1.37587761743982
FBN3	1	1	-0.468912606410606	-1.5116531835409
FBXL13	1	1	-0.89697778718911	-4.29585075243433
FBXL16	1	1	-0.0502007653041915	-2.41358804567774
FBXL18	1	1	1.86593275768317	1.29176962510626
FBXL5	1	1	-0.186446910075767	1.92866572872679
FBXL7	1	1	-2.3905686189457	-1.85259055956324
FBXO11	1	1	0.885885904260056	1.23381102220098
FBXO41	1	1	1.10935808224239	0.726746202865047
FBXW7	1	1	-0.113253956012352	1.29854130879919
FCHO1	1	1	0.253674144573586	-2.60547828539331
FER	1	1	-1.23777401941262	1.87076622382681
FER1L5	1	1	0.33495455486335	-1.98737478121241
FER1L6	1	1	-0.225796108417137	-0.514421938500004
FERMT2	1	1	-2.7844530393406	-2.29288864000757
FERMT3	1	1	1.33144950372733	-3.28111314638575
FEZ2	1	1	0.869096415765659	1.20075249806921
FGD1	1	1	0.361583525963204	1.37933766976873
FGD3	1	1	0.513492072649376	-2.50017976625879
FGD4	1	1	-0.182822828464134	-0.0202655778737837
FGD5	1	1	-3.09943235414468	-0.348956345161992
FGF12	1	1	-1.85386574762307	-2.95194148882349
FGF13	1	1	-1.52632391946755	-1.95060634478052
FGF14	1	1	-3.21702659624062	-1.7116842256399
FGF18	1	1	-1.55254352586709	-0.90312957628687
FGF9	1	1	-1.18009937303506	-1.78592538698633
FGFR1	1	1	-2.34038723009072	-1.30369424684961
FGFR2	1	1	-0.548961167506798	-0.672020910820561
FGFR3	1	1	-0.352910881213768	-0.237194536766606
FGFR4	1	1	-0.74845004575692	-0.0660259710164839
FGFRL1	1	1	-0.239752297572716	1.95859778062384
FHAD1	1	1	-0.897746329478844	-4.29656648500879
FHDC1	1	1	0.979103273429052	-0.578469513496953
FHL2	1	1	-1.52456963556252	-1.71951389177759
FHOD3	1	1	0.188443238563912	-1.20295524462183
FIBCD1	1	1	0.0146430085376664	-0.708215235313969
FIGN	1	1	-1.69418180482827	-2.58471822603663
FIGNL1	1	1	1.84954517585792	0.76699674264471
FILIP1	1	1	-2.62566841142617	-2.91168069704493
FILIP1L	1	1	-3.11847675340615	-2.29715013369043
FLI1	1	1	-2.74952114122353	-0.251820324501591
FLNA	1	1	-2.87990105646096	-2.54941129549463
FLRT1	1	1	-1.45462739961587	-1.8527393327566
FLT1	1	1	-3.10652387636147	-0.312698362907963
FLT4	1	1	-3.07709539430581	-0.390284775337773
FLVCR2	1	1	1.25990733010329	-3.42486381395777
FMN1	1	1	-0.977320437602623	1.34194839135687
FMN2	1	1	-1.32596672075234	-2.54493331774195
FMNL1	1	1	1.24167498452224	-2.84191369875391
FMNL2	1	1	1.12734895450629	1.27234530583898
FMNL3	1	1	-3.22745883958779	-0.581808088860112
FMO5	1	1	-0.817373876742943	-0.215168951592045
FMR1	1	1	0.379745836086647	1.42856186763327
FN1	1	1	-3.12851226823769	-1.54635095461329
FNDC1	1	1	-3.33213937776528	-1.66545057161768
FNIP2	1	1	-0.0940121461673812	1.28527701036016
FOLR2	1	1	1.35656892759361	-3.42929458483179
FOXA1	1	1	0.566473806925194	-0.28558373316248
FOXA2	1	1	-0.611904030017479	-0.34203863008936
FOXC1	1	1	-0.0793570329471663	-1.00701045855005
FOXC2	1	1	-2.99247348802529	-0.916674612602788
FOXD2	1	1	-0.331978206805809	-0.623842238030034
FOXF1	1	1	-2.74658430116616	-2.47143411501368
FOXK1	1	1	1.87494945032157	1.30924248830358
FOXN1	1	1	0.52810623747863	-1.35710334642847
FOXO4	1	1	1.30404957634963	0.497153402724666
FOXP2	1	1	-1.84217584627114	-1.97942733629664
FOXQ1	1	1	-0.328166608981712	-0.423672436317998
FOXS1	1	1	-3.27383649843179	-0.67841124399622
FRAS1	1	1	-0.821300034694298	-0.724863766274052
FREM1	1	1	-1.13444030778847	-0.899897574028569
FREM2	1	1	-1.1865423967167	-0.996326683601933
FRMD3	1	1	-2.19676149385415	-0.839026926598149
FRMD4A	1	1	-2.58374989526711	-0.52198886736353
FRMD6	1	1	-0.262764339618309	0.243651391425533
FRY	1	1	-1.38541758554421	-0.563095091423588
FRYL	1	1	-0.18835676210366	1.68563020364325
FSCN1	1	1	-0.158793454341514	-0.536506413063603
FSCN2	1	1	0.65034180385627	-0.998622416100102
FSIP1	1	1	-0.856815700702293	-4.0192842470022
FSTL3	1	1	-2.88649309175454	-0.955763577065068
FSTL4	1	1	0.00539773208655558	-1.31204891069849
FSTL5	1	1	-1.85162842767678	-2.92050695284327
FTH1	1	1	-1.16141784685097	0.75230324403326
FURIN	1	1	2.17944240076102	-1.68275403841456
FUT7	1	1	1.10264931125201	-2.50469875200708
FXYD2	1	1	-0.811700825862511	-0.410106896004277
FXYD3	1	1	0.911618605904357	-0.646846531471806
FXYD6	1	1	-0.989723448924644	-2.65046167238672
FXYD7	1	1	-0.197841649226768	-2.59586095674952
FYN	1	1	0.454189623422997	-2.30294465883692
G3BP2	1	1	-0.00628066556893148	1.44228720799963
G6PD	1	1	-1.13323176401101	0.794730187812251
GAB1	1	1	-0.1030827810093	1.59576368466894
GABBR2	1	1	-1.27438557641946	-2.16470241411646
GABRB3	1	1	-2.28835070627175	-1.96898746355494
GABRD	1	1	-3.05599844949685	-0.527212618431645
GABRG3	1	1	-1.50428283708535	-1.5540595041128
GADD45G	1	1	1.68812357885398	0.227806092658443
GAK	1	1	-0.259618525676353	1.88567066327612
GAL3ST1	1	1	-0.684268956355675	-0.126535414299565
GAL3ST2	1	1	-0.168722992114647	-0.727777956566411
GALK2	1	1	2.47778415185966	-1.89652585848291
GALM	1	1	-0.437800650767906	0.240008355536861
GALNT14	1	1	-0.184802060298546	-0.956087111076909
GALNT2	1	1	-1.85550010698281	1.36115729943792
GALNT6	1	1	-0.173536782435997	-1.19265746935328
GALNT7	1	1	0.346789116688149	-0.18109679087122
GALNT9	1	1	-1.59285891550027	-1.11345171793421
GALNTL6	1	1	0.0677486012653276	-0.372724531731206
GALR1	1	1	-1.46057212846719	-2.69006776674707
GAP43	1	1	-1.78079307573281	-2.885759829125
GAPDHS	1	1	-2.22435987489663	-1.98273801668604
GAS2	1	1	-0.941487198047264	-0.309656857094365
GAS7	1	1	-2.56588924425088	-1.7041568742605
GATA1	1	1	-1.28314602868996	-1.96422099932154
GATA2	1	1	-1.3991090108677	-0.899761198601323
GATA3	1	1	-0.776035075358971	-1.22500276430567
GATA4	1	1	-0.563048486880882	-0.288702486595708
GATA5	1	1	-2.53573549287759	-2.23164844377955
GATA6	1	1	-0.678597097568138	-0.293031691155034
GATAD2B	1	1	-1.99148762720071	1.49974078074972
GCK	1	1	-0.0889501621051864	-2.21893739565332
GCLC	1	1	-1.14668667810403	0.7961636795191
GCNT1	1	1	0.292521233387367	-0.478556631645756
GCNT2	1	1	-1.1286855985447	0.818419815459651
GCOM1	1	1	0.391539568729775	-1.45647692545374
GDA	1	1	-0.864768748454674	-0.114029644569951
GDF5	1	1	-0.335407858066185	-1.78252935274561
GDF6	1	1	-3.0095301915928	-1.64081525667627
GDF7	1	1	-0.841831927470787	-0.143011568626958
GDPD3	1	1	0.510160739250557	-1.30654668672998
GDPD5	1	1	-0.064752464465721	-1.18338775499781
GET4	1	1	1.88761841756858	0.789321423926753
GFAP	1	1	-1.59421718614541	-2.6121706949087
GFI1	1	1	0.949277475193219	-2.57434654100855
GFI1B	1	1	-0.673476104907616	-1.83704042299707
GFOD1	1	1	-1.22764218347512	1.90235769883673
GFPT2	1	1	-3.25982130067788	-1.57402133806665
GFRA1	1	1	-1.48397768037759	-1.19183373316248
GGT5	1	1	-3.28866184251748	-1.46494436129053
GHR	1	1	-1.136636142902	-1.63356780870874
GHRHR	1	1	-0.837747221164329	-0.341174124321538
GIPC2	1	1	-0.906321172885521	0.00502085820714893
GJC2	1	1	-0.169135575465782	-2.06587123735865
GLCE	1	1	2.40299474699058	-1.82905673845728
GLDC	1	1	-1.23810422914468	-0.0312042222829634
GLDN	1	1	0.660622114963905	-3.29594945772608
GLI1	1	1	-2.73544562356911	-1.13747668131311
GLI2	1	1	-2.75586021440469	-1.15626191957911
GLI3	1	1	-0.237939720325096	0.257304908194942
GLIS1	1	1	-1.6975480367466	-0.828315495094853
GLIS2	1	1	-2.78925335901223	-1.69562721117456
GLIS3	1	1	-0.958784346751793	-0.744880198082524
GLT1D1	1	1	-1.66877401369057	-0.904644011101323
GM2A	1	1	0.896590179480688	-3.38336801393946
GMDS	1	1	0.291019911594765	-0.445770262322026
GMPR	1	1	-2.24081337945901	-2.10085153444727
GNA12	1	1	1.88683521253623	0.906749488273067
GNA14	1	1	-0.778445367984398	-0.977424620232182
GNAL	1	1	-0.764515047244652	-1.81193542345484
GNAO1	1	1	-1.69497120874368	-2.68093871935328
GNAZ	1	1	-0.742856865100487	-3.03015279634913
GNG2	1	1	-2.18064129846535	-1.65074109896143
GNG7	1	1	-1.81995428102456	-1.41807484491785
GNGT1	1	1	-1.86695468919717	-3.12077522142847
GORAB	1	1	-1.98434865968667	1.47765469686071
GPA33	1	1	-0.366086368732078	-0.58823585375269
GPC1	1	1	-0.401601915530785	0.396517993369502
GPC3	1	1	-0.957878117732628	-0.583715199074345
GPC4	1	1	-1.31834900873147	0.36603021756689
GPC5	1	1	-1.71677029626809	-2.28928518160303
GPC6	1	1	-3.35607421892129	-1.5628097043844
GPD2	1	1	1.0357334340886	1.44820690290014
GPM6B	1	1	-1.91948593156777	-1.37262344225367
GPR137B	1	1	-0.277479415111168	0.318679095664424
GPR146	1	1	-2.32278621690713	-0.800218580803471
GPR156	1	1	-0.424600725345238	-2.61603212221582
GPR157	1	1	-0.920847182445152	1.65716529027502
GPR158	1	1	-1.87183177965127	-3.06123351915796
GPR160	1	1	0.0857387731746598	-1.43814825876673
GPR162	1	1	-0.825297122172935	-4.2597799287649
GPR173	1	1	-0.465747718982323	-3.07301854952295
GPR39	1	1	-0.287190084628685	0.146574975409908
GPR55	1	1	1.07124503953017	-2.42117118700464
GPR62	1	1	-0.0970991899295882	-2.20693063600977
GPR78	1	1	0.463183964319603	-1.41132998331507
GPRC5A	1	1	0.144152099914925	-0.0190255628438765
GPRC5C	1	1	-1.19059551256142	-0.355297325691777
GPRIN1	1	1	-0.331961517505272	-2.70786428316553
GPSM1	1	1	-0.619440679721458	-2.72752666338404
GPT	1	1	-1.10005629556618	0.135246278205318
GPT2	1	1	-0.980895404986961	0.353824378409786
GRAMD1B	1	1	-0.294060235194786	-0.552147148689824
GRAMD1C	1	1	-0.318187241725548	1.37978589669744
GRAP2	1	1	0.997396646715777	-2.58185529573877
GRB10	1	1	-3.07545316713296	-0.286657332024174
GRB14	1	1	-0.89000630872689	-0.323935268959599
GRB7	1	1	1.32141965133704	-0.693684099754887
GREB1	1	1	-1.4403528024479	-0.783023594460087
GREB1L	1	1	-1.50315726297341	-1.61177396639307
GREM2	1	1	-2.33688366907082	-1.69457006319483
GRHL2	1	1	1.20009856922187	-0.692348002037602
GRHL3	1	1	0.502136136122124	-1.24066090448816
GRIA1	1	1	-1.86812055604897	-2.36091041429956
GRIA4	1	1	-1.84349525468789	-2.24150800569971
GRID1	1	1	-2.56380069749795	-1.52284049852808
GRID2	1	1	-1.78768837945901	-2.75398254259546
GRID2IP	1	1	1.67541038496055	0.158747435965938
GRIK2	1	1	-1.63317788141213	-2.10227012499292
GRIK3	1	1	-1.98909962671243	-2.11133289202173
GRIK4	1	1	-1.97935855882607	-2.11835956438501
GRIK5	1	1	-1.86075771348916	-2.60561704500635
GRIN1	1	1	-0.221486811809166	-2.52826690538843
GRIN2A	1	1	-1.28631723421059	-2.1487164483877
GRIN2B	1	1	-1.04171884553872	-1.78888988359888
GRIN2D	1	1	0.0485936949924394	-2.83601236208399
GRIP1	1	1	0.241349036522286	-1.17393779619654
GRIP2	1	1	1.75148736936607	-2.68784618242701
GRK5	1	1	-2.77154410379372	-0.0116448388906294
GRM1	1	1	-1.57641852395974	-2.23964357241114
GRM3	1	1	-1.38201392190896	-2.52181815966089
GRM4	1	1	-1.17743194597207	-2.95132255419214
GRM5	1	1	-0.910289650134666	-4.34890937670191
GRM7	1	1	-1.14069736497842	-1.96227121218165
GRM8	1	1	-1.74890029924355	-1.43876862390955
GRN	1	1	0.850422466822044	-3.73672866686304
GSG1L	1	1	-1.23344576852761	-2.71325826509913
GSN	1	1	-2.1717935849949	-1.02733254297693
GTDC1	1	1	0.651515210695641	1.56639492646734
GUCY1A2	1	1	-3.16418684022866	-0.462276457390385
GULP1	1	1	-2.36699164407693	-1.74126577242334
GXYLT2	1	1	-3.34211099641763	-1.65999841555079
GYPC	1	1	-2.47131240861855	-1.85975789888819
HADH	1	1	0.033330495186226	1.61579388515036
HAND1	1	1	-1.58230293291055	-2.51946019991358
HAPLN1	1	1	-2.8923004915043	-1.27389883860071
HAUS7	1	1	0.285314733810799	1.42179834977667
HBG2	1	1	-1.88669336336098	-2.24753665789087
HCN2	1	1	-0.655767803363426	-2.77439880236109
HCN4	1	1	-1.15445435541116	-2.8718495355459
HDAC4	1	1	1.39812877280273	1.48478347198049
HDAC5	1	1	1.38501825434722	0.55504560605566
HDAC9	1	1	0.31637465459861	-0.216164349159794
HDGF	1	1	-1.96624959009133	1.47393566504995
HDLBP	1	1	1.21979167563476	1.43577295676748
HEBP1	1	1	0.440936709471123	0.125623704352779
HECW1	1	1	-1.7557653238102	-0.974967239937382
HECW2	1	1	-3.16487873094521	-0.405474423012333
HEG1	1	1	-2.87530935304604	-0.565155504784184
HERC2	1	1	2.38727163774528	-1.82403468950708
HERC3	1	1	-0.0866141368671492	1.2852914346842
HERC6	1	1	1.99620115263023	-2.77603673799952
HES2	1	1	0.979486888922827	-0.727531193337041
HEYL	1	1	-3.1662148286625	-0.904838799080449
HGFAC	1	1	-1.4489935685917	-0.116873024544316
HHAT	1	1	-1.87119830148659	0.953301907935542
HHIPL1	1	1	-0.569210295848472	-2.88984250887354
HIBADH	1	1	1.91747784120597	0.861556650557918
HIBCH	1	1	1.21200853092231	1.39840686456243
HIC1	1	1	-3.34229457872353	-1.29102253778894
HIF3A	1	1	-0.469014768771751	-1.90223312242945
HIPK3	1	1	-0.931422238521202	1.80482763186972
HIVEP3	1	1	-0.424872045688255	0.988072039046688
HK2	1	1	-2.25983393686257	0.56507110730688
HMCN1	1	1	-2.55532396333657	-1.74596500261744
HMG20A	1	1	2.44296454889335	-1.86233806475123
HMGA2	1	1	-0.527393346004112	-1.66348218782862
HMOX1	1	1	1.26376986009635	-3.20543527468165
HNF1A	1	1	-0.800608997516258	-0.0677220807882124
HNF1B	1	1	-0.561711077861412	-0.230077980599003
HNF4A	1	1	-0.816899781398399	-0.0593698011251265
HOMER2	1	1	0.990985772289412	-1.23008751734217
HOXA10	1	1	-1.12309301393472	-0.805941103539067
HOXA3	1	1	-1.00602913396798	-0.820390938362675
HOXA9	1	1	-1.18781054513894	-0.861045597633916
HOXB3	1	1	-0.980814581088646	-0.915926216682988
HOXB7	1	1	-1.03856969373666	-0.903222082695561
HOXC4	1	1	-0.947752480678184	-1.06731080873926
HOXC6	1	1	-0.922059183292015	-1.29738616808374
HPCA	1	1	-1.0765935231968	-2.99341916902979
HPCAL1	1	1	-0.248018627338035	0.869163276114864
HPSE2	1	1	-2.96621716516457	-2.43967056139429
HR	1	1	0.418401355572121	-1.29351377352198
HRH1	1	1	0.363976592846291	-0.522614000877934
HRH3	1	1	-1.19959438341103	-2.74030303820093
HRK	1	1	0.104101712532417	0.458439828315181
HS1BP3	1	1	0.949131410285906	1.01539468900244
HS3ST3A1	1	1	-1.60099638002358	-1.04787587984522
HS3ST3B1	1	1	-1.59259021776162	-0.518449305138188
HS3ST4	1	1	-1.22761452691994	-1.52405142649134
HS3ST5	1	1	-0.879480724506004	-1.96350526674707
HS3ST6	1	1	0.326119477577583	-1.36322641237696
HS6ST1	1	1	-0.422705774478538	-0.0337357507558638
HS6ST2	1	1	-0.535794739894493	-1.43264102800806
HS6ST3	1	1	-1.28021395700417	-2.18334960802515
HSD17B14	1	1	-0.196246628932579	0.340994836249751
HSF2BP	1	1	-0.0472144533916549	0.69429052011053
HSPA12A	1	1	-1.41964090364419	-0.16100311144312
HSPB1	1	1	0.244158620663063	-2.98490667208155
HSPB7	1	1	-2.62485063569985	-3.1249823556753
HSPG2	1	1	-3.07904088991128	-0.570348499855595
HTRA1	1	1	-3.38423383729897	-1.57233452661951
HTRA3	1	1	-3.47587287919961	-1.62466764315088
HTT	1	1	-0.225858335666283	1.8631745590357
HUNK	1	1	-1.29997718828164	-1.50585222109278
HUS1	1	1	1.85126685602226	0.799782873549861
HYAL1	1	1	-0.772949342898949	-0.157533644280034
HYDIN	1	1	-0.844615464381798	-4.31014060839136
ICA1L	1	1	-0.642896537952049	-3.64573192461451
ID1	1	1	-1.83574355142556	-1.18335008486231
ID2	1	1	-1.81023562448464	-1.06174254282435
ID3	1	1	-1.57318842905007	-1.30324959619959
IDUA	1	1	-0.206715946368797	1.90183568135778
IFFO2	1	1	0.608380789585487	-1.13886475428064
IFI16	1	1	2.02767526609458	-2.75549363954981
IFITM3	1	1	2.01425945264854	-2.75151538713892
IFNGR2	1	1	0.663738752432243	1.32727456227819
IGDCC3	1	1	-1.69450271623574	-1.94597530230005
IGDCC4	1	1	-1.7118805696293	-1.88170814379175
IGF1R	1	1	2.01093148691215	-1.55869436129053
IGF2BP1	1	1	-0.525181417636497	-1.80231332643946
IGF2BP2	1	1	-0.353982215098961	-1.67491006716211
IGF2BP3	1	1	-0.36184537904702	-1.84537935121973
IGFBP2	1	1	-1.45339620607339	-1.52415895327051
IGFBP4	1	1	-1.83185351388894	-0.324457405647832
IGFBP5	1	1	-3.05424273508034	-1.54836988314112
IGFBP7	1	1	-3.24249685304604	-0.795228003105717
IGFL4	1	1	-0.239082698993309	-1.33154797419031
IGSF11	1	1	-1.9031750013157	-2.81412649019678
IGSF21	1	1	1.3002400646881	-3.35951757296045
IGSF3	1	1	0.870653423197643	-0.116291521629887
IGSF9	1	1	1.27902483446159	-0.691270588478642
IKBKE	1	1	-1.95726883905373	1.36312604085485
IKZF3	1	1	0.854174556858914	-2.52566480501612
IL11	1	1	-2.69936907785378	0.0506689561990923
IL16	1	1	1.06398426992454	-2.54728364809473
IL17D	1	1	-2.75115025537453	-1.63931369646509
IL17RD	1	1	-1.47775519388161	-0.309415339073735
IL17REL	1	1	-0.147597794704063	-1.70934820040186
IL19	1	1	-1.41795075433694	-0.619208334526616
IL1R1	1	1	-2.65777385728799	-1.30055570467432
IL1RAPL2	1	1	-0.753417496852501	-0.879611252388554
IL1RL2	1	1	0.831724892087357	-1.39238452776392
IL27RA	1	1	-0.21556258695565	-1.72486591204126
IL2RB	1	1	1.13198500377692	-2.59320115908106
IL34	1	1	0.626317853756325	-1.94616174562891
IL6R	1	1	-1.27863395708047	1.36054158345739
ILK	1	1	2.60132789117851	-0.818311213097172
ING5	1	1	1.26402860385932	1.43407374755423
INHA	1	1	-0.0738155891223983	0.613409758963985
INHBB	1	1	-2.19753063219033	0.291182757773799
INO80C	1	1	0.981525825984852	0.398476363578243
INPP4A	1	1	0.744799430199043	1.16001463071386
INPP4B	1	1	0.0215996454433366	-0.32850479944666
INPP5D	1	1	1.1766801427082	-2.73677205904444
INS-IGF2	1	1	-1.5784622480198	-0.300413368782597
INSR	1	1	-3.09275091188393	-0.240277288994389
INSRR	1	1	-0.854002957515343	-1.53138685091456
INTS1	1	1	1.92115544778861	0.893106581130428
INTS12	1	1	-0.0124359180255965	1.59651351110022
IP6K3	1	1	-2.62093985574685	-3.32446336611231
IPMK	1	1	-1.0297207881733	1.76439595357458
IQCD	1	1	-0.845241551570518	-4.37099981172998
IQCE	1	1	1.94027232629813	0.989243151107234
IQCH	1	1	-0.671421175174339	-4.4727377878042
IQGAP1	1	1	2.32714712125816	-1.82919692858179
IQGAP2	1	1	-0.0771117259784774	-0.325835226616459
IQSEC3	1	1	-1.18709624307595	-3.01935481890162
IRF2	1	1	0.147492701836006	1.6116001619486
IRF2BP2	1	1	-1.9565516759678	1.34883773461859
IRF6	1	1	1.2733286867813	-0.730796574196416
IRF8	1	1	1.28678196174659	-3.09581613405665
IRS1	1	1	-0.353731517963035	-0.49478316172083
IRX4	1	1	-0.577052836589439	-1.64682245119532
ISG15	1	1	1.98262559873618	-2.76651239260157
ISG20	1	1	1.83729677898444	-2.68254518373926
ISL2	1	1	-0.119450454883201	-1.23213338716944
ISM1	1	1	-3.11663043992959	-1.72770547731836
ISM2	1	1	-1.15959752099953	-1.71855687960108
ISYNA1	1	1	0.100092167683022	-2.36533975466211
ITGA1	1	1	-3.21183622377358	-0.774488209328251
ITGA11	1	1	-3.40824687974892	-1.5763230310293
ITGA2	1	1	0.504268790312187	-0.917510031303959
ITGA3	1	1	0.661376799173729	-0.542948006233769
ITGA5	1	1	-3.17199409501992	-0.869354008278447
ITGA6	1	1	0.461735601253883	-0.840957401833134
ITGA8	1	1	-3.02033412950478	-0.76701569422205
ITGA9	1	1	-2.56758535402261	-0.834740160545903
ITGAL	1	1	1.2328113268093	-2.81253957613428
ITGB2	1	1	1.22123118741073	-3.25335883959253
ITGB4	1	1	0.514444167442696	-0.893121002754765
ITGB6	1	1	0.84296763939418	-0.789694546303349
ITGB8	1	1	0.13627051813163	-0.00162911280115186
ITM2C	1	1	0.0333409259990617	-0.446495770058232
ITPKA	1	1	-0.134216909579857	-0.777040718636113
ITPKB	1	1	-2.3005286504551	-2.15533161028345
ITPR1	1	1	-1.51439369218789	-1.86258220537623
ITPR2	1	1	-0.389064555339439	-1.10009288652857
ITPR3	1	1	0.788052866883652	-0.645777224144536
IVD	1	1	2.37324118120231	-1.67277860506495
IVL	1	1	0.584825808830635	-1.23915266855677
JAG1	1	1	-3.08828962343179	-0.525445698341923
JAG2	1	1	-2.88379014032326	-0.15463948114832
JAK3	1	1	0.981116681076662	-2.49126529558619
JAKMIP1	1	1	1.13822811347999	-2.58776521547754
JAKMIP3	1	1	-1.14733016984902	0.777825476088924
JAZF1	1	1	-0.322203641109093	-1.12532925470789
JMJD7-PLA2G4B	1	1	2.24188863737144	-1.72876930101831
JPH2	1	1	-2.7969316293522	-2.76058292253931
JPH3	1	1	-0.723699813060387	-2.77808666094263
JSRP1	1	1	0.679878885574715	-2.59540319307764
JUP	1	1	1.25606908900298	-0.779269693932133
KALRN	1	1	-0.502437358073814	-0.42678999765833
KANK2	1	1	-2.79461920755349	-2.41849422319849
KANK4	1	1	-0.768473510913475	-1.25245785578211
KCNAB1	1	1	-1.63326800363503	-2.00910615786036
KCNAB2	1	1	-2.23666823404275	-2.11863708361109
KCNB1	1	1	-2.18481505411111	-2.43336295946558
KCNB2	1	1	-1.28126490610085	-2.92127609117945
KCNC1	1	1	-0.896116738490684	-2.96069812639673
KCNC3	1	1	0.0320359419063493	-2.81791066988428
KCNC4	1	1	-0.918448095492943	-2.06804418428858
KCND3	1	1	-0.987375264339073	1.49009180203955
KCNE4	1	1	-3.46821392076455	-1.23814558847864
KCNH1	1	1	-1.42551005380593	-1.29996800287684
KCNH2	1	1	-0.96852696435891	-3.00928687914331
KCNH3	1	1	-0.865165476970299	-4.35886382921656
KCNH4	1	1	-0.0866638471408919	-2.53531694277247
KCNH6	1	1	-1.18179500596963	-2.93187808855494
KCNH7	1	1	-1.23918068902932	-3.00083255632837
KCNH8	1	1	-1.68486655252419	-2.8246345506521
KCNIP1	1	1	-1.47911680238686	-2.35134315355738
KCNIP2	1	1	-2.298261766605	-1.05122685297449
KCNIP3	1	1	-0.0907388974948958	-1.45976400240381
KCNIP4	1	1	-1.62142217653237	-1.27747654779871
KCNJ12	1	1	-1.21703327196084	-0.548519848427373
KCNJ15	1	1	-0.340758686236961	-0.650272368034917
KCNJ16	1	1	-0.882863884143455	-0.747226236900883
KCNJ4	1	1	-1.34856880205117	-0.734896896919804
KCNJ5	1	1	1.00191571069516	-3.39743471010645
KCNJ6	1	1	-1.22253501909219	-2.86307811602076
KCNK1	1	1	-0.116758828334434	-0.745940207085209
KCNK13	1	1	1.14347737533607	-3.22639894350489
KCNK2	1	1	-1.81613386171304	-2.04986476763208
KCNK3	1	1	-1.29248059289895	-2.45305299623926
KCNK5	1	1	-0.295934562854393	0.0128657831339067
KCNK9	1	1	-1.8819290448948	-3.10838794573267
KCNMA1	1	1	-2.59122217195473	-2.69001912935694
KCNMB2	1	1	-1.14483702676736	-2.94167089327295
KCNMB4	1	1	-0.521768813304527	0.694469334044856
KCNN2	1	1	-2.19718993204079	-2.2151603685232
KCNN3	1	1	0.614855433531181	-2.5598115907522
KCNN4	1	1	0.0732597659305497	-0.705830811104375
KCNQ1	1	1	-0.441047554187401	-1.05995726450403
KCNQ2	1	1	-0.749671225719078	-2.87061071260889
KCNQ4	1	1	-2.58914196985207	-2.7590622888418
KCNQ5	1	1	-1.82766640680276	-2.186203478417
KCNS3	1	1	-0.741536622218712	-1.25139975412806
KCNT1	1	1	-2.07265604036294	-3.33572006090601
KCNT2	1	1	-1.99522650735818	-1.07959341867884
KCP	1	1	-1.87802422540627	-1.11750626429041
KCTD1	1	1	0.113502259083168	-0.321239946922856
KCTD14	1	1	0.725017065830605	-1.31301879747828
KCTD15	1	1	0.72581134242572	0.891861678519649
KDM5B	1	1	-1.90531337755166	1.40827739373724
KHDRBS3	1	1	-2.0326494027897	-1.71828412874659
KIAA0232	1	1	-0.227876787356956	1.90101558105032
KIAA0895	1	1	1.7326784680561	0.895858885207576
KIAA1217	1	1	1.21448483569183	-0.864851234993535
KIAA1257	1	1	-0.735012893848045	-4.2398653016897
KIAA1324	1	1	0.424435729809181	-0.387827871880131
KIAA1522	1	1	1.37023674947776	-0.646040199837285
KIAA1549	1	1	-1.35552800195657	0.0446357740549272
KIAA1614	1	1	0.395700568981545	-1.62077617510279
KIAA1755	1	1	-2.86806190507851	-1.70206165178736
KIF17	1	1	-0.937986617259605	-4.11011981829126
KIF19	1	1	-0.866103534869774	-4.25681543215235
KIF1A	1	1	-0.739043002299889	-2.80707120760401
KIF21B	1	1	0.67673158151664	-2.04098415239771
KIF25	1	1	-1.07028687494241	-1.81334352358301
KIF26A	1	1	-2.85638201730691	-0.311012743553715
KIF26B	1	1	-3.56764114397012	-1.50132417543848
KIF5C	1	1	-1.23969305055581	-2.63374328478296
KIF6	1	1	-0.89743161695443	-4.25683498247583
KIRREL3	1	1	-1.10771072404824	-2.23181676729639
KISS1R	1	1	-2.27568018930398	0.515997172751827
KIT	1	1	-0.742225890330894	-1.12146115168055
KITLG	1	1	-0.778429989986046	-0.53809666498621
KLF11	1	1	0.61140724522628	1.57676679030935
KLF12	1	1	-2.60415137308083	-1.53725743158777
KLF13	1	1	1.74047976238288	1.45868528024237
KLF3	1	1	-0.160427932910545	1.46992159024755
KLF5	1	1	1.02106251818694	-0.754748581490117
KLF7	1	1	-0.874049072436912	1.77103793756048
KLF8	1	1	1.21083488566436	-0.986830710014897
KLHL13	1	1	-1.10467708604775	-1.26278734072168
KLHL2	1	1	-0.23872960107766	1.21504271165411
KLHL29	1	1	-0.522660379581077	-0.865461824974614
KLHL30	1	1	-2.52637351053201	-3.36816024645289
KLHL32	1	1	-0.989247684650047	-3.65984105928858
KNDC1	1	1	-0.524244790248497	-3.03989696367701
KRT1	1	1	0.603191877432243	-1.2965390668722
KRT14	1	1	0.523324812479393	-1.10422611101587
KRT18	1	1	1.28160717589416	-0.471328734001713
KRT19	1	1	1.14516974491634	-0.549361227593022
KRT7	1	1	0.971595956660883	-0.943384884438115
KRT8	1	1	1.29790558917083	-0.507031439385014
KRT80	1	1	0.960538749300019	-1.31957626207789
KRT86	1	1	0.967062654621975	-1.4397423253866
KRTAP10-12	1	1	-0.891090994052513	-2.37759780748804
KRTCAP2	1	1	-1.9800690461918	1.46769321099798
KSR1	1	1	-1.83765781419717	0.137856484809322
KSR2	1	1	0.866867380864994	-0.154630182823735
KY	1	1	-1.73440659540139	-2.18804550035914
KYNU	1	1	-0.138744001559837	-0.764774321159917
L1CAM	1	1	-0.679697518519981	-1.91234397753199
L3MBTL4	1	1	0.601466114349739	-1.82064819200953
LAMA1	1	1	-1.54262006776772	-0.925295590004521
LAMA2	1	1	-3.07849109666787	-1.48168110712488
LAMA3	1	1	0.410078699417488	-0.842187403282719
LAMA4	1	1	-3.1551703264042	-0.876116512856083
LAMB1	1	1	-2.12917745607339	-0.487824438652592
LAMB4	1	1	-0.354928617648704	-1.21234369142969
LAMC1	1	1	-2.62819588678323	-0.257612465462285
LAMC2	1	1	0.825576196141617	-0.725159643730717
LAMC3	1	1	-2.61878884332619	-0.751998900017338
LAPTM5	1	1	1.25775619847335	-3.21879768236597
LCLAT1	1	1	0.855007352955715	1.25577652589361
LCNL1	1	1	0.441940004654305	-2.40904092653711
LCOR	1	1	-1.14831579225503	1.75333583489935
LCP1	1	1	1.30328765017547	-3.13322973116358
LCP2	1	1	1.38163360459365	-3.13160085543116
LDB2	1	1	-2.998283748798	-0.477361677727299
LDB3	1	1	-2.62988508241616	-3.096688269219
LDLRAD3	1	1	-1.22865880029641	1.44293719665091
LEF1	1	1	-0.516571169070824	-1.32550287111719
LEFTY1	1	1	-0.795621519260033	-1.10719418390711
LEMD1	1	1	0.0361813853458329	-0.854684351524907
LEPR	1	1	-1.90527999895058	-0.651228188118535
LETM1	1	1	-0.184028511218651	1.85179972783606
LFNG	1	1	-0.213955884151085	-1.90807866915186
LGALS3	1	1	0.997423677422182	-1.42397165163477
LGI3	1	1	-1.19571841257058	-1.91050577028711
LGI4	1	1	-2.81215990083657	-0.742411373695927
LGR4	1	1	-0.501338725261314	0.415532113471431
LGR5	1	1	-0.738663797549827	-1.25704502924402
LGR6	1	1	0.180122430153267	-1.3116049753042
LHFPL2	1	1	1.19008123380698	-3.30443096025904
LHFPL3	1	1	-1.7948118497654	-2.46184825762232
LHX1	1	1	-0.73473561304055	-1.7557983384939
LHX2	1	1	-0.348245387248619	-2.35047721727808
LHX6	1	1	-2.96997678773843	-0.463313816628056
LIFR	1	1	-1.1546009828373	-2.02553081377466
LIMCH1	1	1	-1.37412202852212	-0.580687521538334
LIME1	1	1	-1.00843680398904	0.128286601462764
LIMS1	1	1	-0.927575831584556	1.79286855594198
LIMS2	1	1	-2.95690382020913	-2.63618326052149
LIN28A	1	1	-0.873451476268394	-2.19665574892481
LIN28B	1	1	-1.71516168611489	-2.81315040453394
LIN7A	1	1	-1.6802164365574	-0.963431595406132
LINGO1	1	1	-2.92551911371194	-0.476420162758427
LINGO2	1	1	-1.79951227205239	-2.3656182275625
LIPA	1	1	0.956724696509616	-3.40547609194239
LIPC	1	1	-1.08450210588418	-0.292164085945683
LIPE	1	1	-2.31007349985085	-1.00226425989588
LLGL2	1	1	1.50581693155326	-0.478027103981572
LMAN1L	1	1	-0.129585747890098	-0.265331982216435
LMCD1	1	1	-3.16402090089761	-1.70251989229639
LMNA	1	1	-2.02776301401101	1.46450919047872
LMO1	1	1	-1.56255233781777	-2.4011840806814
LMO7	1	1	1.07114609581985	-0.964109419426518
LMOD1	1	1	-2.91406786935769	-2.5830483423086
LMTK2	1	1	-0.945932154826744	1.7446894063143
LMTK3	1	1	0.074606175251381	-2.79749774797876
LMX1A	1	1	-1.26036584871255	-1.25889205797632
LMX1B	1	1	-0.619635110072716	-1.50106453760584
LNX1	1	1	-0.185885434321983	1.11365509168188
LONRF2	1	1	-0.770547633342369	-2.30726432665308
LOXL1	1	1	-3.59101045625649	-1.55659127100428
LOXL2	1	1	-3.20964372652016	-0.920587061485844
LOXL3	1	1	-1.94794786470376	-1.48528504236658
LOXL4	1	1	-0.21270454423867	-0.936666010460454
LPAR1	1	1	-1.07562482850991	-2.0247979150625
LPAR3	1	1	-0.844667439632042	-1.05751991136988
LPCAT1	1	1	-1.80351055162392	-0.156822680077153
LPIN1	1	1	0.0797461817935868	0.334597350516719
LPIN2	1	1	-0.914237146548851	-0.147189854225712
LPP	1	1	-1.14838016527138	1.73132103816549
LRBA	1	1	-0.073604946307762	1.46464234725515
LRFN2	1	1	-1.2026921560093	-2.28326701982935
LRIG1	1	1	-1.08416116731606	-0.668169020256596
LRP1	1	1	-3.18523109453164	-1.82034110887964
LRP1B	1	1	-1.81937110918008	-2.20958566530665
LRP2	1	1	-1.23600042360268	-1.74364995821436
LRP8	1	1	-1.1492105771824	0.797521592536373
LRRC1	1	1	1.17541886372127	-0.377131460747319
LRRC23	1	1	-0.835454826526268	-4.36061954363306
LRRC26	1	1	0.358661587067024	-0.427492617210942
LRRC43	1	1	-0.850612883739097	-4.26691198214014
LRRC4B	1	1	-0.910750870875938	-2.71707773073633
LRRC4C	1	1	-1.94921887414895	-2.00998544558008
LRRC56	1	1	2.99055253965415	-0.801357029518681
LRRC7	1	1	-1.75281107919656	-2.04352331026514
LRRC8C	1	1	1.50171678764381	-2.05691099031885
LRRFIP1	1	1	1.1349375496582	1.41659391061346
LRRK1	1	1	2.21627854806937	-1.83195972307642
LRRN2	1	1	-0.715351228885277	-2.15924358232935
LRRTM4	1	1	-1.92197740571938	-2.90725707872828
LRTM1	1	1	-2.56573093431435	-3.62100934847315
LRTM2	1	1	-1.19633472459756	-2.97143411501368
LSAMP	1	1	-2.4765859891697	-1.7979125963064
LSP1	1	1	1.21022030217208	-3.01541328295191
LTBP1	1	1	-2.72631180780373	-2.15871238573511
LTBP2	1	1	-3.34783399599038	-1.57962655886133
LTBP4	1	1	-1.18433130281411	-1.30093908174952
LUZP2	1	1	-1.23447597520791	-1.6541309343191
LY6E	1	1	2.0171896169857	-2.72412633760889
LYL1	1	1	1.41582849127807	-2.51056575640162
LYN	1	1	1.21039980155982	-3.13826560839136
LYNX1	1	1	0.84019334865369	-1.2788422094198
LYPD6	1	1	-0.659836416415794	-0.896785257896977
LYPD6B	1	1	-0.425180916957481	-0.816510437569218
LZTS1	1	1	-3.17885149019204	-1.00182509287317
MACROD2	1	1	-1.61701095598183	-1.78159952028711
MAD1L1	1	1	1.89608752233543	0.817162753501338
MADCAM1	1	1	-0.968110804729088	-2.27785062654932
MADD	1	1	3.04558193189658	-0.768046139320927
MAFA	1	1	-2.39921367662392	-3.56199121340235
MAFG	1	1	-1.16983116167031	0.897066236892146
MAFK	1	1	1.83514183265723	0.922791959205074
MAGI2	1	1	-0.644283538035972	-3.59964084490259
MAGI3	1	1	0.0791531155780717	0.523516298690242
MAL	1	1	0.34392684204139	-1.77644109590967
MAL2	1	1	1.29926785332717	-0.681970356545048
MAML2	1	1	-0.75468874471627	1.39123010770361
MAML3	1	1	-0.0703146507068709	1.72802132503073
MAMLD1	1	1	-1.33683646219216	0.207329036155147
MAN1A1	1	1	-0.896745209865196	-0.307608364662724
MAN1C1	1	1	-0.298038487605675	-0.65235996111353
MAN2B2	1	1	-0.215319638423546	1.91292780772726
MANBA	1	1	-0.451005225352867	1.60273736850302
MAP1B	1	1	-1.28039372461282	0.71211278573553
MAP2	1	1	-1.17509520547829	0.791258336463375
MAP2K5	1	1	2.38932048780479	-1.87428521975
MAP3K12	1	1	-0.39133859174691	-3.17846774919947
MAP3K13	1	1	-0.867409472636803	1.64829504624884
MAP3K9	1	1	1.51179342968024	-0.0963506685109907
MAP4K4	1	1	0.842344145007507	1.1439557088999
MAP6	1	1	-0.652451996974571	-3.49134445055445
MAPK10	1	1	0.422694201298134	-2.66533613069971
MAPK11	1	1	-0.625486617259605	-3.0074343667837
MAPK12	1	1	-0.654648904971702	-2.94143676622828
MAPK4	1	1	-0.760843520335777	-1.94811582430323
MAPK6	1	1	2.41537820798911	-1.90030288561304
MAPKAPK2	1	1	-2.03615153329812	1.43464142219107
MAPKBP1	1	1	2.3760340164379	-1.84999036653956
MAPRE2	1	1	-0.924992089442833	-0.568564890465336
MAPT	1	1	-0.77824306982003	-2.6614756570669
MAST4	1	1	-1.17937648790322	1.79752665893118
MATN1	1	1	-0.0926069070621566	-2.48662567003687
MATN2	1	1	-0.858747248820885	-1.30033087595423
MB	1	1	-2.61327350633584	-3.70325898989161
MBD5	1	1	-0.346000676326378	1.9061855091242
MBOAT1	1	1	0.39878397686042	0.0613727583078569
MBOAT2	1	1	0.209217543430702	-0.0667490945668989
MBP	1	1	-0.310337906055076	-2.07083511217554
MCAM	1	1	-3.15626562135659	-0.759370802483159
MCC	1	1	-0.375748400859459	0.322788716712398
MCF2L2	1	1	-0.141868715457542	-2.43064260347803
MCTP1	1	1	-2.13382709520303	-1.21631741388758
MCTP2	1	1	0.381134445495979	-0.658275841316777
MDFI	1	1	0.103823239632027	-0.677345036110478
MDGA1	1	1	-1.086178903751	0.825743915000362
MDGA2	1	1	-1.90089715021096	-2.90262317522486
MDS2	1	1	-1.50809658067666	-1.68239402636011
ME3	1	1	0.745252589412109	-0.165042875847417
MECOM	1	1	-1.29198968904458	-0.950000284752446
MEF2A	1	1	2.39190017683067	-1.86671399935206
MEF2C	1	1	-2.6334611226841	-3.35835409029444
MEF2D	1	1	-2.03837240236245	1.50718897716085
MEGF10	1	1	-2.14360988634072	-1.88753509386499
MEGF11	1	1	-1.92277753847085	-2.3390560136648
MEGF6	1	1	-1.16466725366555	-1.87260722979029
MEIS1	1	1	-1.27168190973244	-1.05863833292444
MEIS2	1	1	2.02772211534538	-1.89159393175562
MEOX1	1	1	-2.39968336122475	-1.08223509653528
MERTK	1	1	1.34723296267547	-3.38195896013697
MESP2	1	1	-0.117032890491112	0.46740710870306
MET	1	1	1.43518352014579	-0.020116089424687
METTL8	1	1	1.10435895127811	1.4379602684168
MEX3A	1	1	0.473617906399147	0.777733088889522
MFGE8	1	1	-2.13073075311623	-1.24549579485376
MGA	1	1	2.42147802812614	-1.76743888719996
MGAT3	1	1	0.348202760048287	-0.599817989906865
MGAT4C	1	1	-1.73834097879372	-1.87012958391626
MGAT5	1	1	-0.913293366603477	1.75196755067388
MGAT5B	1	1	-0.495554452113731	-2.57839155062159
MGLL	1	1	-0.281012897662743	-0.75711226328333
MGST1	1	1	0.111373002357857	0.182401181617183
MGST2	1	1	-0.0604013253971175	1.75056052342932
MIA2	1	1	-0.77635360258065	-0.226259230217534
MIB1	1	1	1.06954510016002	0.558352829375667
MICALL2	1	1	1.57123714191474	0.499134422698421
MID1	1	1	-0.43988001840554	0.00277805463354053
MITF	1	1	-2.33720148103677	-1.94082164629419
MLLT3	1	1	2.37818753225364	-0.406178711495
MLPH	1	1	0.426423842735664	-0.00600695475061475
MLXIPL	1	1	-1.16445267694436	0.172323466697139
MME	1	1	-1.76321137445412	-0.971654413780766
MMEL1	1	1	-0.186050658397301	-1.30197048052271
MMP11	1	1	-3.61136043565713	-1.47176527842005
MMP14	1	1	-3.61080921190224	-1.37472128733118
MMP16	1	1	-2.68052590387307	-1.26211285456141
MMP17	1	1	-2.25511825578652	-1.65032625063379
MMP2	1	1	-3.37803018587075	-1.59687042101343
MMP28	1	1	0.506654764242546	-0.840344427666264
MMRN2	1	1	-2.96314442651711	-0.324170349678593
MN1	1	1	-2.86346400278054	-1.08801984652002
MNX1	1	1	-0.608100180797203	-2.54195213182886
MOB2	1	1	2.85533964139976	-0.776168583473759
MOCOS	1	1	-0.52430773275338	0.313704968848628
MORC4	1	1	0.351551170177834	1.17596447602789
MORN1	1	1	-0.632235889606102	-4.45713758333643
MOV10	1	1	2.01389395696677	-2.81294584139307
MOV10L1	1	1	-3.61318958299599	-1.40269446238001
MPDZ	1	1	-2.61770904558144	-2.20555877550562
MPP2	1	1	-0.345210318736656	-2.92206811769922
MPP7	1	1	1.29262208444633	-0.722780941567021
MPPED1	1	1	-1.24288809793435	-1.37554621561487
MPPED2	1	1	-1.79625809686623	-1.43192553385218
MRAS	1	1	-0.457249765567406	-1.55321764810999
MRC2	1	1	-3.26181495683633	-1.7929921136709
MREG	1	1	1.19426545006789	1.33344555036108
MRPL33	1	1	0.903935807474033	1.50226420299093
MRPS9	1	1	1.07818996412315	1.33040988580267
MRVI1	1	1	-2.9596501638218	-2.53552675112207
MSC	1	1	-3.29986417787514	-1.19013142450769
MSH6	1	1	0.750213901229279	1.25612843171637
MSI1	1	1	-0.671278124026878	-2.60346174105127
MSI2	1	1	-0.754790787868126	1.68678844110052
MSLN	1	1	0.307693714924233	-0.74391794069727
MSN	1	1	0.213893468208687	0.270690204062862
MSR1	1	1	1.16549927992381	-3.33132362230738
MSRB3	1	1	-2.98940194147073	-2.4835176454397
MST1R	1	1	0.93522218912475	-0.787874458870488
MSX1	1	1	-1.5526050378605	-0.768478869041997
MTA3	1	1	0.881153716422693	1.16256749764959
MTMR12	1	1	1.43863766891517	1.04532539979498
MTR	1	1	-2.09832156198464	1.6008397354273
MTUS2	1	1	-1.12878239648782	-2.33689784868677
MUC2	1	1	0.157760853596108	-0.589926003059941
MUC4	1	1	0.410526926346199	-0.682980297646123
MUC5B	1	1	0.400318438835518	-0.576061485848027
MUC6	1	1	-0.343521838359459	-0.480244158348637
MXD4	1	1	-0.171323065929039	1.9997652484564
MXRA8	1	1	-3.34837663667641	-1.6882786737295
MYB	1	1	0.458119357653038	-0.211103437981206
MYBPC3	1	1	0.725905398555176	-2.3541927324148
MYBPH	1	1	-2.56697428720437	-3.58196878298243
MYEOV	1	1	0.578727985449211	-1.27032160623987
MYH11	1	1	-2.85540855424844	-2.62355565889795
MYH14	1	1	1.35717212659873	-0.398962496361333
MYH15	1	1	-2.28838217752419	-2.8438224778982
MYL3	1	1	-2.56274879472695	-3.5911746011587
MYL5	1	1	-0.182042365245445	1.92260843650381
MYLK	1	1	-2.90877068536721	-2.62503909929712
MYLK2	1	1	-2.56285584466897	-3.62479114397486
MYLK3	1	1	-2.58884871499978	-3.64198684557398
MYO10	1	1	0.921160203121678	-0.239473579964238
MYO16	1	1	-1.23355234163247	-2.44045686586817
MYO1B	1	1	0.193144495315926	0.430240990081233
MYO1D	1	1	1.25698220235862	-0.656449793419438
MYO1E	1	1	2.37396084768333	-1.82070875032862
MYO1F	1	1	1.34960305196799	-3.16973590715845
MYO3B	1	1	-0.599641924075706	-1.65053701265772
MYO5A	1	1	2.0716751764492	-1.97469043596705
MYO5B	1	1	1.46262323362388	-0.463434456429082
MYO5C	1	1	1.65451037389793	-0.556441305718022
MYO7A	1	1	1.28440954787292	-3.01257085665186
MYO7B	1	1	-0.830955510310753	-0.025139807304936
MYOD1	1	1	-2.52412927644692	-3.61398506029566
MYOM1	1	1	-2.56461990373574	-3.36804914339502
MYOM2	1	1	-2.58028901117287	-3.65633010729273
MYRIP	1	1	-1.24704897897683	-2.01839637621363
MYT1	1	1	-0.933197860889061	-2.79203891619165
MYT1L	1	1	-1.20202196138345	-2.95479631288965
NAALADL2	1	1	-1.14786303537331	-0.795280216774541
NAGK	1	1	0.809641371198074	1.10738492147009
NALCN	1	1	-3.14122140901528	-1.71408319338282
NANOG	1	1	-0.668125276736839	-1.99952363832911
NANOS3	1	1	0.00562256080664836	-2.78543662889917
NAV1	1	1	-1.8913854409977	-0.180833576759892
NAV2	1	1	2.11152755720176	-0.544296024880009
NAV3	1	1	-2.39709485071145	-1.56226372583826
NBAS	1	1	0.905568229682819	1.27515256539862
NBEA	1	1	-1.4004095842167	-2.13804292543848
NCALD	1	1	-0.878918414287193	-1.25232076509913
NCAM1	1	1	-2.09705698984109	-2.5502204881521
NCK2	1	1	0.617709601946251	0.975417734542293
NCKAP5	1	1	-0.159391288928612	0.15547227994482
NCOA1	1	1	0.843291374571697	1.17870760098974
NCOA2	1	1	-0.994572286777122	1.76446575061361
NDRG1	1	1	-2.26040161149941	0.552112461486263
NDRG2	1	1	-0.349651341609581	-0.613924501976567
NDRG4	1	1	-0.541963701419456	-2.30961751802881
NDST4	1	1	-1.72756755845986	-2.80396652086695
NDUFA10	1	1	1.23268854124107	1.40509903565924
NDUFA4L2	1	1	-2.32977402704201	0.428624154487056
NDUFS2	1	1	-2.05243433015786	1.43997973338644
NEBL	1	1	0.901403705306427	-1.2195548997732
NECAB1	1	1	-2.05224621789895	-2.19835424288233
NEDD4	1	1	2.46032034856834	-1.77350282534082
NEDD4L	1	1	0.807646701760666	0.0217719091562456
NEGR1	1	1	-2.29749811189614	-2.0026245103689
NEK10	1	1	-0.86797011392556	-4.29613256319483
NEK11	1	1	-0.502036218814476	-4.51884031160791
NEK7	1	1	-1.9679828931614	1.53844618932287
NELL1	1	1	-1.34117568033181	-1.65013551577051
NELL2	1	1	-1.83047783868752	-2.83026647432764
NEO1	1	1	2.28225492937125	-1.88940191133936
NES	1	1	-2.203450803928	-1.73205184801539
NEURL1B	1	1	-0.565073375873192	-0.881572483620244
NFAM1	1	1	1.25755190355338	-3.30155277117212
NFASC	1	1	-2.13886678712807	-1.74160289629419
NFATC1	1	1	-0.322723632030113	-2.48207759722193
NFATC2	1	1	-1.05106735723458	1.7133583439974
NFATC4	1	1	-0.407957201175316	-3.12991285189112
NFE2	1	1	-0.097689156703575	-1.26229786737879
NFE2L2	1	1	1.00525645417728	1.41136598722021
NFIA	1	1	-1.42324364679299	0.97750961915533
NFIB	1	1	0.538186783619301	0.603520275512142
NFKB1	1	1	0.113156730957405	1.62618875638525
NGEF	1	1	-1.18987572687112	0.275413991370601
NGF	1	1	-2.80280411737405	-0.742473600945073
NGFR	1	1	-1.96864736574136	-1.47360753878077
NHEJ1	1	1	1.19146429998435	1.33905518189947
NHS	1	1	-1.51178515451394	0.37607717649023
NID1	1	1	-3.11785400407754	-0.953376053413945
NINJ2	1	1	-0.248438959292992	-2.14391755922754
NINL	1	1	0.259949142761604	-1.86636876924952
NIPBL	1	1	0.875303568966763	1.56878370181601
NKAIN1	1	1	-0.984491949252708	-2.32424306734522
NKAIN2	1	1	-1.70143044488869	-2.76135682924707
NKAIN3	1	1	-1.45808733003579	-2.60582780703028
NKAIN4	1	1	-1.95572078721963	-1.66726112230738
NKD1	1	1	-0.59890580671273	-1.37264656885584
NKD2	1	1	-1.10520637529336	-1.6034660325857
NKX2-5	1	1	-0.773398881129845	-2.19862127169092
NKX3-1	1	1	-0.170315866641624	-0.510653732857304
NLGN1	1	1	-1.78409493463479	-2.31445741518457
NLN	1	1	0.881963117696421	1.80291235581915
NLRC5	1	1	1.92527394992866	-2.76848745211084
NLRP1	1	1	1.00552224618949	-2.47212886675318
NLRP6	1	1	-1.01472378271065	0.0952701582102007
NME7	1	1	-1.95185554521523	1.46549362079184
NMNAT2	1	1	-1.7647928048893	-1.17417693003138
NNMT	1	1	-2.43893659608804	-0.0809111581655317
NOP14	1	1	-0.151453142337425	1.86027252809088
NOS1	1	1	-1.35285962121926	-1.77076101168116
NOS1AP	1	1	-1.85356319444619	1.49489367143194
NOS3	1	1	-3.09135187166177	-0.4162785993429
NOTCH3	1	1	-3.18877828615151	-0.547219275078374
NOTCH4	1	1	-3.13665378587685	-0.347683666786748
NOTUM	1	1	-0.524206643275841	-1.35099816187342
NPAS2	1	1	-0.499322300128563	0.016429902472896
NPAS3	1	1	-1.91245663660012	-1.21116447313746
NPC1	1	1	-0.0208144833370284	-0.866277216515141
NPDC1	1	1	-0.378105645351036	-2.66102266176661
NPNT	1	1	-0.020025377444847	0.322647334494991
NPSR1	1	1	-0.337055688075645	-0.607261179527836
NPTN	1	1	2.41721617681541	-1.87290811403711
NPW	1	1	0.321125383205788	-2.11173200472315
NR0B2	1	1	-0.703312044314964	-0.360292433342534
NR1H3	1	1	1.28153460723914	-3.37079954012354
NR1H4	1	1	-0.787321691684349	-0.158704279503422
NR2F1	1	1	-1.0290225793644	-0.820997236809331
NR2F2	1	1	2.06188463670768	-1.84318160875757
NR3C1	1	1	-1.67998803155862	-0.0170564637990767
NR3C2	1	1	-0.376571898631676	0.193609715857906
NR5A1	1	1	0.243834848232643	-2.01327466829737
NR5A2	1	1	-1.11609232919656	-0.0505499826284224
NR6A1	1	1	1.67645579082526	0.136652709403438
NRARP	1	1	-2.94235122697793	-0.247176168999272
NRCAM	1	1	-1.08491361635171	-1.48113679750879
NRG1	1	1	-1.62627757089577	-0.933261154732304
NRG2	1	1	0.0409958313182756	-1.3507256494375
NRG3	1	1	-0.944587116412743	-1.01747584207972
NRN1	1	1	-1.78629124658547	-2.32565879686792
NRP1	1	1	-3.17368925111733	-0.342182634911137
NRP2	1	1	-2.22026718156777	-1.01353168352564
NRXN1	1	1	-1.42692363756142	-2.74877166613062
NRXN2	1	1	-1.21090710657082	-0.324773787102299
NRXN3	1	1	-2.04254115121804	-2.19855356081446
NT5DC3	1	1	-2.83564031618081	-2.70350742205103
NT5E	1	1	-0.0560292650981978	-0.628931997856694
NTF3	1	1	-1.24993694322549	-1.37428474291285
NTF4	1	1	0.406999225445168	-1.27276897295435
NTM	1	1	-3.25869548814736	-1.64720964296778
NTN1	1	1	-1.09837973611794	-1.00700950487574
NTNG1	1	1	-1.73342550294839	-2.38231134279688
NTNG2	1	1	-3.01398504274331	-1.72839212282618
NTRK1	1	1	-0.966881041698082	-1.8872303949209
NTRK2	1	1	-0.954355244807823	-1.44453835352381
NTRK3	1	1	-2.18974602716409	-1.51541542871912
NTSR1	1	1	-0.407640938930138	-1.96645021303614
NUAK1	1	1	-3.39062583940469	-1.31223225458582
NUAK2	1	1	-0.672280078105553	-1.25179934366663
NUCB2	1	1	2.93839108449973	-0.66960358484705
NVL	1	1	-2.00934494035683	1.47233176366369
NXNL2	1	1	-1.47073519723855	-0.785664795479375
NXPH1	1	1	-1.51492369668923	-2.70345449312647
NXPH4	1	1	-2.26852596300088	0.507400633254451
NYX	1	1	-1.46912181871377	-0.460436581215458
OAF	1	1	-1.34213269250832	-0.339062689385014
OBSCN	1	1	-2.53721964853249	-3.62071943148096
OBSL1	1	1	-0.00755739706002034	0.542301060119075
OCA2	1	1	-1.27405179040871	-1.70732450350245
OCLN	1	1	1.48999881250419	-0.397906778893071
ODF3L2	1	1	-0.0133852412029342	-2.83913707598169
OGDH	1	1	1.88495867950477	0.801693083205623
OLFM1	1	1	-0.654735093288048	-2.49039506777247
OLFM2	1	1	-0.628883962802513	-2.67607402666529
OLFML1	1	1	-3.22555387514077	-1.47835540636499
OLFML2A	1	1	-2.67369545000039	-0.389217136940556
OLFML3	1	1	-3.08782899873696	-1.75360488756617
ONECUT3	1	1	-0.246777777843101	-0.497650621971684
OPCML	1	1	-1.93835914628945	-1.7046189294668
OPN3	1	1	-1.91268337266885	1.36250126496832
OPN4	1	1	-1.14358294504128	-2.70535993441065
OPRD1	1	1	-1.07545030611001	-2.6502599702688
OPRL1	1	1	1.38279631239928	-2.62345313890894
OSBPL1A	1	1	0.474142486877815	0.0211768163828081
OSBPL3	1	1	0.758526916332619	-1.57794904573877
OSBPL5	1	1	2.71716832620658	-0.806424616417485
OSGIN1	1	1	-1.12085664766274	0.782413841643733
OSR1	1	1	-1.8877495576664	-0.865633009514409
OTOF	1	1	1.93004667264976	-2.74520826204737
OTUD7A	1	1	-0.540863042049034	-2.21277570589502
OTX1	1	1	-0.315074210338219	-1.78718137606104
OVOL1	1	1	1.25414457423248	-0.583612440666752
OVOL2	1	1	1.26342311007537	-0.660788534721928
P2RY6	1	1	1.12044023973502	-3.13277244432886
P4HA1	1	1	-2.2293239881321	0.580827952781124
PACRG	1	1	-0.874904756717308	-4.30550575121363
PACSIN1	1	1	0.208536321945564	-2.08476734026392
PACSIN3	1	1	1.63626950485267	1.46253001824896
PADI1	1	1	0.540357465572731	-1.29759788378199
PADI2	1	1	-0.526863460712059	-0.944639681419926
PADI3	1	1	0.425548727341072	-1.36813187464197
PADI4	1	1	-1.82216346757851	-2.11519145830591
PAG1	1	1	-1.91584766405068	-0.519102572044926
PAH	1	1	-1.17905319230996	-0.122542379936772
PALLD	1	1	-2.95714581506692	-2.55771112307032
PALM	1	1	-0.60387373464547	-2.81157779558619
PAPLN	1	1	-0.137498979739769	-1.66507291658838
PAPPA	1	1	-2.01748908060036	-0.908134220680791
PAPPA2	1	1	-1.17564332979165	-2.21391057833155
PAQR5	1	1	-0.709617381267174	-0.100425957283574
PAQR7	1	1	0.428749377556221	-1.38164019449671
PARD3B	1	1	-1.04847085969888	1.72405070201437
PARD6B	1	1	1.67521732551612	-0.632309197029667
PARD6G	1	1	0.903896963872091	0.155662299552364
PARM1	1	1	-1.81599843996011	-0.920449017128544
PARP1	1	1	-1.99433553712807	1.4165956987528
PARP10	1	1	2.00973522169151	-2.74294423922022
PARVA	1	1	2.6991747568325	-0.777371405205327
PAX2	1	1	-1.33411753671609	-0.798678396782475
PAX3	1	1	-2.2009717275425	-1.95997238024195
PAX5	1	1	0.573654825516121	-2.50501966341456
PAX7	1	1	-2.11990559595071	-3.35675191744288
PBX1	1	1	-1.35141432779275	-1.07067251070459
PBX3	1	1	2.69199263555564	-0.371146200737553
PBX4	1	1	-1.52631342905007	-1.66626691683252
PC	1	1	-1.13423789041482	0.279034377494258
PCBP3	1	1	-0.65727663534127	-2.51489972933252
PCDH12	1	1	-3.11674058931313	-0.430143116554814
PCDH15	1	1	-1.80155385034524	-2.51841688021143
PCDH7	1	1	-2.47080743806802	-1.99878644808252
PCDH9	1	1	-1.68911564844094	-2.50308370455225
PCGF1	1	1	1.0195744211749	1.06324076787512
PCGF3	1	1	-0.221805219821556	1.91546261445562
PCK2	1	1	-1.00475323694192	0.21680736676733
PCLO	1	1	-1.62390006082497	-1.73897600038965
PCSK2	1	1	-1.33686173456155	-2.78867912157496
PCSK5	1	1	-2.56292498605691	-1.42985319956263
PCSK6	1	1	-1.43209088342629	-1.44212603434046
PDCD1LG2	1	1	1.51099657518424	-3.07820939882715
PDCD6	1	1	1.4852167914585	1.11848664418737
PDE10A	1	1	-1.27576911943398	-0.674885271629887
PDE11A	1	1	-1.47363818185769	-1.6257204995962
PDE1C	1	1	-2.4231089402958	-1.29106235369165
PDE2A	1	1	-2.9001060773655	-0.384170292458134
PDE3A	1	1	-2.74316037195168	-2.00922584398706
PDE4A	1	1	1.3263411472515	0.709542395034236
PDE4B	1	1	0.04649179679908	-0.212695358833867
PDE4C	1	1	0.368555600471871	-0.62182116373499
PDE4D	1	1	0.0738131354526445	-0.428906677803593
PDE6B	1	1	-0.431014304332359	-2.52930497988184
PDE7B	1	1	-2.8792640020176	-0.372026680550175
PDE8A	1	1	2.37975561124839	-1.79220867021998
PDE8B	1	1	-1.421628122501	-1.68188094957789
PDE9A	1	1	0.467378670997994	-0.182021854958134
PDGFA	1	1	1.41120102507629	0.474329949775142
PDGFC	1	1	-2.66802347200356	-1.72655486925562
PDGFRA	1	1	-2.93816054361306	-1.59019374712427
PDGFRB	1	1	-3.35911167161904	-1.327729700646
PDIA6	1	1	0.932806727193372	1.32205104962866
PDLIM1	1	1	-2.01491344469033	-0.444021462044316
PDLIM4	1	1	0.121637697048561	-1.7075395570608
PDLIM5	1	1	0.00885170204199992	1.28015327588598
PDLIM7	1	1	-2.81506336229287	-2.64716672762354
PDZD2	1	1	-1.98251879709206	-0.201066731056767
PDZD4	1	1	-0.695274954013451	-2.71368217333277
PDZRN3	1	1	-3.04986346261941	-1.87065934999903
PDZRN4	1	1	-2.73228443162881	-2.52613258226831
PEAR1	1	1	-2.91902483003579	-0.350549696526127
PEBP4	1	1	-1.49539196985207	-1.55273222788294
PECAM1	1	1	-3.02260387437783	-0.346858500084477
PECR	1	1	1.04128314060725	1.26348889009039
PEPD	1	1	-1.00577497976266	0.220866681495113
PER2	1	1	1.24728288752593	1.4292397512583
PEX5L	1	1	-0.933550005130394	-2.00522851808985
PFKFB3	1	1	-2.28594959276162	0.573711515822811
PFKFB4	1	1	-2.21390998857461	0.552889110007686
PFKP	1	1	-2.23524797456704	0.581220985808772
PGBD5	1	1	-0.793775563411339	-2.87629175051172
PGD	1	1	-1.18155944841347	0.813380123534603
PGF	1	1	-2.33797085779153	0.121259690680904
PGM1	1	1	-0.923103695087059	0.696758748450679
PGR	1	1	-1.38254702585183	-0.904051779350834
PHACTR1	1	1	-2.12037480371438	-2.00466632708033
PHACTR3	1	1	-0.0251676489635543	-1.74453687532862
PHEX	1	1	-0.822572832278831	0.593750955024166
PHF21B	1	1	-0.73837113874398	-2.91404723986109
PHGDH	1	1	-0.668383364848717	0.440311790862483
PHLDB1	1	1	-2.64658701913796	-1.46537995203455
PHLDB2	1	1	-0.256968980006798	-1.26264643534144
PHLPP1	1	1	0.908149136878626	0.286850453772945
PI4KB	1	1	-2.00795281427346	1.4757918132929
PID1	1	1	-2.3817693044468	-1.89396190508326
PIK3AP1	1	1	1.2179467032627	-3.16578245027979
PIK3C2B	1	1	0.387636954613106	-1.2495670305105
PIK3C2G	1	1	-0.426903133563621	-0.571263788780766
PIK3CD	1	1	1.11244110269107	-2.47466039522608
PIK3R1	1	1	-1.29937160509072	2.19503526524584
PIK3R3	1	1	-1.3606044103428	2.07702678576986
PIP4K2A	1	1	-0.199439411334618	-1.94902372225245
PIP5K1B	1	1	-0.358673696689232	-0.483039616188603
PIP5KL1	1	1	0.583807970114128	-1.76735591753443
PIPOX	1	1	-1.08694923418008	-0.0235674367757612
PIR	1	1	-1.10544813173257	0.780995608725948
PITPNC1	1	1	-0.862939958743675	0.657209397712154
PITX1	1	1	0.0899866173938676	-0.96670412882288
PITX2	1	1	-1.17540133493386	-1.7825055108877
PIWIL4	1	1	-0.133778577022179	-1.44250106676539
PKD1L1	1	1	-2.80855811136208	-0.330357788643437
PKD1L2	1	1	-1.13838136690102	0.699784161010188
PKDCC	1	1	-0.815787916354759	-0.764429091057377
PKHD1	1	1	-0.831898455791099	-0.41473150118311
PKIB	1	1	-1.1974955846592	-2.74904203279932
PKIG	1	1	0.354767496414559	-2.10367345674952
PKNOX2	1	1	-2.0350211908146	-1.70938920839747
PKP1	1	1	0.483440096207039	-1.18554305895289
PKP3	1	1	1.18460404378928	-0.735025881371098
PKP4	1	1	1.20331724984206	1.27209127084295
PLA2G4D	1	1	0.53387149674453	-1.46158790453394
PLAC1	1	1	-1.68440807359658	-3.02590656145533
PLB1	1	1	1.32203271491088	-3.16668414934595
[truncated: 1,024 more rows]
[truncated: 46 more columns]

## Sheet: AP-2γ - cancer vs (non)-cancer
Additional file 1 – Content of modules from particular Monocle3 approach.
MODULE 1						MODULE 2						MODULE 3						MODULE 4						MODULE 5						MODULE 6						MODULE 7						MODULE 8						MODULE 9
id	module	supermodule	dim_1	dim_2		id	module	supermodule	dim_1	dim_2		id	module	supermodule	dim_1	dim_2		id	module	supermodule	dim_1	dim_2		id	module	supermodule	dim_1	dim_2		id	module	supermodule	dim_1	dim_2		id	module	supermodule	dim_1	dim_2		id	module	supermodule	dim_1	dim_2		id	module
A2ML1	1	1	-0.332872324502905	-0.639615667460189		AACS	2	1	3.35347134538845	1.04731463134505		ABCB8	3	2	-2.70785944989963	3.95456634700514		AATF	4	3	4.62516433664517	-1.93090308964037		ACO2	5	4	0.653828210317651	7.20988022029616		ACTN4	6	5	5.14043862291531	1.72361219167925		ABCA1	7	6	0.0302441782589353	-4.25684322178148		ABL2	8	7	1.41482552711771	-3.04130996525072		ABHD12	9
A4GALT	1	1	-0.598414116418799	-1.86070264637254		AAK1	2	1	1.65268196829514	0.561553942563309		ABHD11	3	2	-2.54692357114597	3.83024464786269		ACACA	4	3	4.505436963522	-1.80312217533372		AP1B1	5	4	0.628663606130639	7.15141569316603		AKT1S1	6	5	4.99324781366543	1.86003361880995		ABCA2	7	6	-0.206806116617163	-4.20406020939134		ACBD6	8	7	1.53064922907309	-2.9510294324138		ACSS2	9
AATK	1	1	-0.883079462564429	0.348955499531998		ABCB9	2	1	3.42780882784084	1.20650951802947		ACD	3	2	-0.375324421441992	4.18959461391188		ACBD4	4	3	4.51108462282375	-2.24095023929857		ARFGAP3	5	4	0.60386050411419	7.18657671153761		AKT2	6	5	5.10799176164822	1.77334755897738		ABL1	7	6	-0.00165348581119407	-4.45568574726366		ADAM15	8	7	1.51936121948914	-2.83909524738573		ADNP	9
ABAT	1	1	-0.559095197236975	0.293139325978531		ABI2	2	1	1.8370560772057	0.0110092037937779		ACSF3	3	2	-0.405208163774451	4.22389923274733		ACLY	4	3	4.55806166597561	-1.85435952007555		ARVCF	5	4	0.632624573194543	7.03949533641554		ANKRD27	6	5	5.13754541345791	1.77736252784945		AGPAT2	7	6	-0.274146252191504	-4.08542360126756		ARF1	8	7	1.50635083683685	-2.92352689564012		AHCY	9
ABCA13	1	1	-0.519432597673377	-0.869596136210189		ACAD10	2	1	3.44379956194119	1.18184505641676		ADAMTS13	3	2	-2.19869106344028	3.41990660369612		ACTG1	4	3	5.06405288644985	-2.76928867161058		ASCC2	5	4	0.643700546705285	7.17891632259108		AP2A1	6	5	5.09292990633206	1.77500516414858		AGTPBP1	7	6	0.0313326782818235	-4.48767389118455		ARHGEF2	8	7	1.18183984526352	-3.09634841739915		ARFGAP1	9
ABCA3	1	1	-1.32528799108311	-1.16658295452379		ACER3	2	1	4.00556857057766	-0.551502597925888		ADCY9	3	2	-1.60792320302769	5.13285838306166		AFMID	4	3	4.90431911417202	-2.90907825290941		ATXN10	5	4	0.5647796458836	7.12886224925734		ARHGEF1	6	5	5.04231006571011	1.77528684079863		ANAPC2	7	6	-0.109309011018714	-4.41219295322679		ARID4B	8	7	1.61372435756878	-3.00519145786546		ARFGEF2	9
ABCA4	1	1	-0.00279253057285178	0.713019775750412		ACSL3	2	1	1.9347952670689	0.0920472019932408		ADHFE1	3	2	-0.625795536554297	2.87265943229414		AKAP1	4	3	5.10479909845547	-2.64224256336473		BCL2L13	5	4	0.710111445867578	7.10861669719435		BBC3	6	5	4.7174034781094	1.60787001677073		ANP32B	7	6	0.0575899548168577	-4.37488426029466		ARL8A	8	7	1.40120824159042	-3.04798282444261		ATP9A	9
ABCA7	1	1	-1.08789103559299	1.37719273805834		ACTR1A	2	1	2.97337192960934	-2.48886026203416		AGAP3	3	2	-2.64943783811375	3.96560608089186		ANAPC11	4	3	4.99906594225124	-2.83415473758958		BCR	5	4	0.627596444570581	7.18887363612868		BCKDHA	6	5	4.98637754389004	1.83084036648489		ARRDC1	7	6	-0.220684342897376	-4.30361570179246		ARNT	8	7	1.46743414842443	-3.06391776859544		ATRN	9
ABCB1	1	1	-2.26061075261875	-0.962197197077499		ACTR6	2	1	3.40970880457119	1.11093871534087		AGBL3	3	2	-2.4656175904636	3.69997440517165		ANKRD13B	4	3	4.36569888063625	-1.80231989681505		BID	5	4	0.71001923748211	6.95557295024611		BCL2L12	6	5	4.87884122797207	1.81085010111548		AUH	7	6	-0.002764874017676	-4.39173997699998		BCL9	8	7	1.51210465201096	-3.11980928241991		B4GALT5	9
ABCB4	1	1	-2.23489206365391	-0.984569204447494		ACVR1	2	1	1.76031575270847	0.0512781018040318		AGK	3	2	-2.64407151273533	3.97190390765883		AP2B1	4	3	4.61205298372463	-1.96609915554308		BRD1	5	4	0.543059594118158	7.11660228908278		BLVRB	6	5	4.79425603815273	1.88850237667777		BICD2	7	6	0.00163418718532693	-4.4436732655742		C1orf112	8	7	1.52534377493815	-2.85758127033495		BCL2L1	9
ABCC1	1	1	0.0501758522625364	0.889024185540451		ADARB1	2	1	2.7924333281155	0.110880481602921		ALG1	3	2	-1.65073960355564	5.25520240009047		APPBP2	4	3	5.12776977487759	-2.54334701359056		CABIN1	5	4	0.635237700426141	7.1219366663716		CADM4	6	5	4.64550716348843	1.78332036972262		BRD3	7	6	0.001546329938928	-4.43449653446458		C1orf198	8	7	1.46697347530083	-3.01383699238084		C20orf194	9
ABCC11	1	1	-1.19496219686313	-0.17573500931047		ADCY6	2	1	3.08771640726284	1.28101136028983		AMFR	3	2	-0.333798580682715	4.29004656017043		ARMC7	4	3	4.98511797853665	-2.7563763982036		CBX7	5	4	0.576788074457208	6.83484016597487		CATSPERG	6	5	5.07921106287197	1.76182404399134		C9orf85	7	6	0.0650113291378416	-4.38920987903856		CAPN2	8	7	1.29412279941992	-3.05930389225267		CABLES2	9
ABCC12	1	1	-3.47789805463596	0.0268671387455601		ADIPOR2	2	1	2.63261765905575	0.951657819154038		ANKRD11	3	2	-0.299172454393347	4.27233778178908		ASPSCR1	4	3	4.94825131365017	-2.8137961751201		CDC42EP1	5	4	0.585677332365075	7.02076946437575		CCDC106	6	5	4.79883987375454	1.81145243585326		CAMSAP1	7	6	-0.0681978993777834	-4.46969426929735		CCT3	8	7	1.55682224699215	-3.00663102924608		CBFA2T2	9
ABCC3	1	1	0.0493692822094358	0.516315805318131		ADK	2	1	3.0284408993359	-2.3413418656566		ANKRD24	3	2	-2.24639385274692	3.46712087333418		ATP6V0A1	4	3	4.68272811838345	-2.19185723125719		CERK	5	4	0.49878204532818	7.08852850139357		CCDC9	6	5	4.94017488428311	1.82465867936827		CDC14B	7	6	-0.0633841090564333	-4.36665118992113		CDC42BPA	8	7	1.61096235283569	-3.04129804432176		CDS2	9
ABCC4	1	1	-1.58720009855076	-0.318115008471237		AEBP2	2	1	2.67621261545376	0.97956888616301		ANKS3	3	2	-1.45358794263645	5.08442174136855		B3GNTL1	4	3	5.05459124513821	-2.81810439884447		CLTCL1	5	4	0.571963793718377	7.15896688640334		CCDC97	6	5	5.02184731432156	1.83233390987135		CDK5RAP2	7	6	-0.115612917459448	-4.37560762226366		CDC42SE1	8	7	1.47531991370873	-3.03458274662279		CEP250	9
ABCC8	1	1	-2.5501598649387	0.621071266534104		AFAP1	2	1	1.86834216781811	-0.714266431925521		AP1S1	3	2	-2.64107077649876	3.94649087131239		BCAS3	4	3	4.94076902338223	-2.48349632084154		COMT	5	4	0.692474908315698	7.18774543941237		CIC	6	5	5.00290901132778	1.85577397287108		CENPP	7	6	0.00447148748592507	-4.43465436756395		CDC73	8	7	1.61955284246163	-3.05288614094041		CHD6	9
ABCD3	1	1	1.43345151388005	1.91322197258688		AFTPH	2	1	1.80960909196095	0.507165419461503		APRT	3	2	-0.40320473245426	4.20733843982436		BPTF	4	3	5.10867316194729	-2.6127692586162		CRELD2	5	4	0.45593673654751	7.07185636699416		CIRBP	6	5	4.14629609056667	2.28633390605666		CIZ1	7	6	-0.00195043615146506	-4.38453449070238		CHD1L	8	7	1.57520415552811	-2.9315210705974		CHMP4B	9
ABCG1	1	1	-0.718062811410864	-2.71942962467454		AGAP1	2	1	1.93096686073498	-0.0291805392482143		ARHGAP17	3	2	-1.66006892255588	5.23870359599806		CASKIN2	4	3	5.02916366525845	-2.80940116703294		CRKL	5	4	0.721847958051721	7.13451849162795		DBP	6	5	4.70879728265957	1.83203695953108		CLTA	7	6	0.20668239065365	-4.29388250171922		CLK2	8	7	1.4988065726395	-3.03074754535936		CST3	9
ABCG2	1	1	-2.3523420625095	-2.1735578900554		AGPAT3	2	1	2.77973908849911	0.13455449283339		ARPC1A	3	2	-2.56494372419163	3.87921987712599		CCDC47	4	3	5.10606724687771	-2.62862886249803		CSNK1E	5	4	0.668699390375177	7.10682426631667		DEDD2	6	5	5.06130439706997	1.78806351363875		CRAT	7	6	-0.0587213569049441	-4.42672742664598		CNST	8	7	1.63510016270832	-2.99244130909227		CTNNBL1	9
ABHD3	1	1	0.636009282552759	0.408792602422013		AGPS	2	1	1.66905970045284	0.197042929532303		ARPC1B	3	2	-2.47899907163425	3.85500274837233		CDC42EP4	4	3	4.86278993555264	-2.68737329304002		CYB5R3	5	4	0.666439241849939	7.22517667949416		DMWD	6	5	4.98645812936978	1.8679882162831		DAB2IP	7	6	0.000113195859948512	-4.36595596134447		CREB3L4	8	7	1.4940380371447	-2.92085279285692		DIDO1	9
ABLIM1	1	1	-0.410551958597144	-1.05662382900499		AHNAK	2	1	3.85946065851406	-0.688702953455673		ATG16L2	3	2	-0.864942722833594	3.41371570766188		CDK12	4	3	4.59789831110195	-1.88912762462877		DEPDC5	5	4	0.538609094106714	7.19782196223952		EEF1G	6	5	4.17663056322292	2.17322449624754		DDX31	7	6	0.042442268812219	-4.36828817188524		CRTC2	8	7	1.44437538378791	-3.05979837238573		DLGAP4	9
ABLIM2	1	1	-2.29977315000339	-0.327160132525192		AMBRA1	2	1	3.50572378107266	-0.588887823221908		ATP6V0D1	3	2	-0.34183280996128	4.26834093272902		CDR2L	4	3	4.90221292444424	-2.98685039341234		DGCR2	5	4	0.661477572404901	7.12026487529494		EGLN2	6	5	4.95326859422878	1.81621232867457		DENND1A	7	6	-0.11523025563999	-4.48861039936327		CYB5R1	8	7	1.47815173038201	-2.94635022938036		DNAJC5	9
ABLIM3	1	1	-0.669173412836035	-0.264978302119003		ANAPC5	2	1	3.34625274606899	1.09547077357985		ATXN7L1	3	2	-2.6029729180698	3.94724880397536		CHMP6	4	3	5.00769884058193	-2.82771648227953		DRG1	5	4	0.653466410123865	7.16326748073317		EML2	6	5	4.98076755472378	1.84344856679655		EHMT1	7	6	-0.0395590596561037	-4.4257551556804		DCST1	8	7	1.57083354064182	-2.7179767018535		DPM1	9
ABTB2	1	1	-1.19557731679722	-0.897351396677719		ANKMY1	2	1	2.03112465807156	0.0261952751896519		AXIN1	3	2	-1.5220095448856	5.17844926059462		CLTC	4	3	5.11445099779324	-2.62252582371019		EP300	5	4	0.682385630094568	7.12780843913771		ERCC1	6	5	4.9626792139645	1.85273812949873		EXD3	7	6	-0.125820332086524	-4.37503970920824		DDX59	8	7	1.51298201003031	-3.03265537082933		DTD1	9
ACACB	1	1	-1.98747127584263	-1.79904354870103		ANKRD13D	2	1	4.04695374437527	-0.472468507883773		BANP	3	2	-0.439725332773169	4.12877546489455		CPD	4	3	4.59015066095547	-1.91456664860033		GAS2L1	5	4	0.638408309900323	7.1668962115071		ERF	6	5	5.05876881548123	1.84708188712813		FAM102A	7	6	-0.0903161101703249	-4.43447364628099		DSTYK	8	7	1.40488312289038	-3.0471946126201		DYNLRB1	9
ACAN	1	1	-2.95233672193333	-2.20683397114061		ANKRD39	2	1	1.99763799377636	-0.020663035509811		BCAR1	3	2	-0.323128991640051	4.22201000392653		CSNK1D	4	3	5.00374872156338	-2.76992667972826		GRAMD4	5	4	0.490642435037652	7.09654174983717		ETFB	6	5	4.95932466455654	1.85479270160414		FAM120A	7	6	-0.0223765902881228	-4.33542407810472		DYRK3	8	7	1.52633012750105	-2.99368442356371		ELMO2	9
ACAP3	1	1	1.07652199932293	2.41507612407423		ANKRD44	2	1	2.18273157545284	-1.45301402866624		BCKDK	3	2	-1.58051722577854	5.18578873813368		CUEDC1	4	3	4.87795144983486	-2.49968208133958		GTPBP1	5	4	0.600410170042077	7.22329078853346		ETV2	6	5	4.95818478532986	1.87000902235724		FANCC	7	6	-0.0907407336597048	-4.4229704266765		EFNA1	8	7	1.40100635087968	-2.85301317035936		ENTPD6	9
ACHE	1	1	-3.91554873517795	0.0330116623661656		ANXA11	2	1	3.03747922846035	-2.52937949955247		BCL7C	3	2	-1.56036346486851	5.30400835216261		CWC25	4	3	4.55377704569058	-1.95194805919908		HDAC10	5	4	0.522001332723657	7.16083513438918		FBXO46	6	5	5.07170683809475	1.77213485777594		FNBP1	7	6	-0.218033605134925	-4.25310529529832		EFNA3	8	7	1.49163842865185	-2.57819284260057		GMEB2	9
ACOT11	1	1	0.0152002043362058	-0.567425144312606		AP1S3	2	1	1.87129396864132	-0.0512389069774013		BFAR	3	2	-1.69462125829502	5.23590146243788		CYB561	4	3	4.59588343568997	-2.60456003010057		HIRA	5	4	0.630652851545373	7.14933048427321		FKRP	6	5	5.07089979120449	1.80427544057585		GALT	7	6	0.332251853429834	-4.18748010456346		EFNA4	8	7	1.60665442713455	-2.74713290989183		GNAS	9
ACOT7	1	1	1.27941010066227	1.73602323472716		AP2A2	2	1	3.49199563928799	-0.608131063578353		BRI3	3	2	-2.48846834234043	3.8365031355641		CYTH1	4	3	4.91408402391628	-2.80137170612596		KCTD17	5	4	0.592593914949457	6.71997486293532		GEMIN7	6	5	4.93717390962795	1.86044921219565		GARNL3	7	6	-0.0629014306430422	-4.46015704929613		ENAH	8	7	1.55165062018589	-2.87427533924364		GSS	9
ACOX2	1	1	-0.456957870042761	0.054215180279984		APLP2	2	1	1.91115958162502	-0.361134899256454		BTBD19	3	2	-1.02653449109836	3.46179448306776		DCAKD	4	3	4.81875283189968	-2.37474335491441		KIAA1671	5	4	0.670335478269616	7.22759948909499		GPI	6	5	4.84694916673855	1.94950111448981		GNAQ	7	6	0.0123922295208372	-4.32122052967332		ENSA	8	7	1.51326373138384	-2.96068967640184		HM13	9
ACOX3	1	1	1.66477454372601	-1.60371531307481		APP	2	1	2.48383874365048	0.222252952458634		C16orf72	3	2	-1.60975950292393	5.18220697581984		DDX42	4	3	5.07817036577419	-2.5867077237346		KLHL22	5	4	0.593967503988305	7.13291965663649		GRAMD1A	6	5	4.95104438730435	1.65541208029009		GOLM1	7	6	-0.0624908738498293	-4.19414533436082		GALNT2	8	7	1.46938954585151	-2.85060561954759		ITCH	9
ACOXL	1	1	-1.60037034086033	-1.13354815304063		APPL2	2	1	3.31191152998165	1.03634844958998		C20orf203	3	2	-0.912602358377417	3.35214887798048		DDX5	4	3	5.04790527292446	-2.68959201633714		KREMEN1	5	4	0.591045207464258	6.80520998180129		GSK3A	6	5	5.10513574548916	1.77114075660922		GPR107	7	6	-0.0173606210116946	-4.38154233753465		GATAD2B	8	7	1.4306713166918	-3.06187833606981		KIF16B	9
ACSBG1	1	1	-1.21297686628147	2.1623110646031		ARAP1	2	1	3.97546774812893	-0.532998455164657		C3orf20	3	2	-0.88205211690708	3.02667151630141		DHX8	4	3	4.70104200311855	-2.14714587986253		LIMK2	5	4	0.724414712869684	7.17450414836623		GYS1	6	5	4.91982705064968	1.87156690895773		HABP4	7	6	-0.0423524909381472	-4.3591333752849		GPATCH2	8	7	1.60418901511387	-3.0104571706035		MAVS	9
ACSF2	1	1	-0.220477157152136	0.141324388386979		ARHGAP12	2	1	2.89558464952664	-2.19036115467332		CARHSP1	3	2	-1.48199956945225	5.32984601199843		DUSP14	4	3	4.65062219568447	-2.02294958889268		LRP5L	5	4	0.376168198072473	6.98553882777907		HNRNPL	6	5	5.05429393717007	1.77236527443148		INPP5E	7	6	-0.0501177840594851	-4.42024530231737		GUK1	8	7	1.5302003390427	-2.97642291843675		MMP24	9
ACSL1	1	1	1.47201507457451	-1.16215432941698		ARHGAP21	2	1	2.74659556814388	-1.99276174366258		CCDC102A	3	2	-0.36861126951023	4.10591779887892		ERBB2	4	3	4.52592117258267	-1.90072716533922		MAPK1	5	4	0.653744286977807	7.19192444026686		HNRNPUL1	6	5	5.10319644876675	1.7531663203261		INVS	7	6	-0.00829272798343528	-4.37249864399217		HDGF	8	7	1.51667556830601	-3.10278333484911		NCOA3	9
ACSL6	1	1	-1.58744757703586	-0.145550859568344		ARHGAP32	2	1	3.70632368990139	-0.421468508837448		CCDC57	3	2	-0.8857778840427	3.28730713069655		EXOC7	4	3	5.07227117487148	-2.73705257236742		MED15	5	4	0.551902062379876	7.25785814464308		ITPKC	6	5	4.85789710947231	1.63280156493403		IPPK	7	6	-0.0913538270358645	-4.36230386554979		HHAT	8	7	1.40509933804081	-2.85757125675462		NCOA6	9
ACSM1	1	1	-1.61536067060276	-0.236217868921981		ARHGAP42	2	1	2.25393433042721	-0.901453149912582		CDK10	3	2	-0.527778678453406	4.02356611430861		FAM117A	4	3	4.59583193727688	-2.33655322849535		MICAL3	5	4	0.500816769086877	7.13423238933302		KIAA0355	6	5	5.11243636079983	1.79973654687621		KANK1	7	6	0.293927854978601	-4.20360673725389		INTS3	8	7	1.43786072649912	-3.11455310642503		NECAB3	9
ACSM3	1	1	-0.315684967554053	0.614804612996354		ARHGEF17	2	1	3.87794691988186	-0.605935705301986		CDK5	3	2	-2.67245762876316	3.96497546375014		FBF1	4	3	4.90914303728298	-2.57871307194017		MICALL1	5	4	0.690214580976526	7.0883091563008		LIG1	6	5	4.93869597383694	1.74823338031985		KDM4C	7	6	0.364216870748559	-4.23874296009325		INTS7	8	7	1.54227004119114	-3.00135101139329		OGFR	9
ACSS1	1	1	-0.123618298089942	-0.117064607737289		ARID5B	2	1	2.78031749197201	-2.54035486042284		CDR2	3	2	-1.65569990209385	5.17493807018019		FBXL20	4	3	4.57963640161709	-1.90954436123155		MORC2	5	4	0.652335590803186	7.19573627650954		MARK4	6	5	5.01240546175198	1.72340300917841		KIAA2026	7	6	0.28475958772854	-4.30156101047777		IPO9	8	7	1.48062026419596	-3.01444877445482		OSBPL2	9
ACSS3	1	1	-2.17795913747593	-0.480799568293319		ARMC9	2	1	2.04895252653317	-0.0673705464579921		CENPT	3	2	-0.585030489480933	3.89245258510329		FDXR	4	3	4.82688600488857	-2.81856168567918		MPST	5	4	0.527300006830255	7.22331415355421		MBOAT7	6	5	5.06779009767727	1.78076471626975		LRRC8A	7	6	0.0277604527111448	-4.36571468174242		IRF2BP2	8	7	1.2641496873732	-3.08037771045946		PCMTD2	9
ACTB	1	1	-2.14222662977024	2.5725534433148		ASB13	2	1	2.72034484811978	-1.9704545861461		CFDP1	3	2	-0.38177877000614	4.22317801654555		FOXK2	4	3	5.0479539103146	-2.80482353031419		MYH9	5	4	0.600219256364862	7.20180641353346		MED29	6	5	5.11540610262112	1.76055100798823		LRSAM1	7	6	-0.116890960252722	-4.34608997165941		KDM5B	8	7	1.59960547753529	-2.90763152897142		PFDN4	9
ACTN1	1	1	-3.74180024198337	-0.936017168162094		ASB3	2	1	1.81646991440014	0.56344841659285		CHCHD3	3	2	-2.7145976357822	4.03817855060317		GAA	4	3	4.7964423365231	-2.56519378483079		NCAPH2	5	4	0.660065180742303	7.12859998882033		MZF1	6	5	4.87159187265591	2.03979651868559		MAMDC4	7	6	-0.176161103761634	-4.29718841373704		KIAA0040	8	7	1.10674945183949	-2.6930219060161		PHF20	9
ACTN2	1	1	-4.06356137327	-0.146439922449813		ASCC1	2	1	3.05437595316128	-2.30816520511888		CHD9	3	2	-0.264637523210486	4.21914731204726		GALK1	4	3	4.99557811685757	-2.81274856388353		NF2	5	4	0.615268237077752	7.09876857936598		NAPA	6	5	5.10124999948696	1.78360148012854		MAPKAP1	7	6	-0.0328548484210573	-4.41400874912523		LGALS8	8	7	1.57698858448223	-2.9275885945537		PIGU	9
ACYP2	1	1	-3.19309561780735	2.52743111789442		ATE1	2	1	2.66551703878597	-1.51719678699754		CHTF18	3	2	-1.28189366391941	4.88041578471877		GGA3	4	3	5.01373512216763	-2.78226388752245		OSBP2	5	4	0.616300231897394	7.06260000407912		NOSIP	6	5	5.00180298753933	1.82225589692809		MED27	7	6	-0.0824376874332033	-4.39151586353563		LMNA	8	7	1.29735211946921	-2.78591693699144		PLCG1	9
ADA	1	1	-0.41118186048313	-0.343986046908126		ATF2	2	1	2.53949732252316	-1.04007710277818		CLEC16A	3	2	-1.60315602353855	5.15486417949416		GGNBP2	4	3	4.62451989122585	-1.98649991810106		PACSIN2	5	4	0.703330165826837	7.09477173030592		NPAS1	6	5	4.84254462190823	1.86606051266409		MLLT3	7	6	0.386611766302148	-4.11386455356859		LYST	8	7	1.32580089487986	-2.91912998020433		PPP1R3D	9
ADAM11	1	1	-2.23535697988315	0.799301909806504		ATF7	2	1	3.42986661859707	1.18514411390044		CMIP	3	2	-0.332690411127051	4.24711261928297		GIT1	4	3	4.51930434175686	-1.87161315738939		PARVB	5	4	0.461744672739068	7.00914035976149		NR1H2	6	5	5.03505021997646	1.7987474674008		MTAP	7	6	0.27946001955227	-4.23020137607835		MAPKAPK2	8	7	1.4899927444096	-2.9581848508098		PRPF6	9
ADAM12	1	1	-3.62961094907566	-1.8593353158214		ATG16L1	2	1	1.92164862819866	-0.0497049218394618		CMTM4	3	2	-0.280031614816626	4.30538641154982		GNA13	4	3	5.19220025011257	-2.54066242038988		PATZ1	5	4	0.671737200700799	7.08372627437331		OPA3	6	5	5.00193197199062	1.83536152780272		NACC2	7	6	-0.0943841271762453	-4.26353181659959		MEF2D	8	7	1.43142535828904	-3.02553333103441		PSMF1	9
ADAM19	1	1	-1.70832007459446	-1.88977850734972		ATG4B	2	1	2.00433302589611	-0.0175554877498012		CNOT1	3	2	-0.273722463167151	4.30810390651442		GOSR2	4	3	4.78180820413784	-2.3748005753734		PCDHA1	5	4	3.09462732740597	9.02016245067336		PAFAH1B3	6	5	4.82994992204861	1.86782767117239		NANS	7	6	-0.0804589324359499	-4.31314004719041		MIA3	8	7	1.62006335624413	-2.98177732288621		PTPN1	9
ADAM23	1	1	-2.08866780332371	-0.211148274538742		ATG9A	2	1	1.98743373819546	0.0161028975269932		COG5	3	2	-2.61841671994968	3.95040188968398		GPRC5C	4	3	4.49266249605374	-2.46124852955125		PCDHA10	5	4	3.09573740431027	9.02303157985426		PAK4	6	5	5.10373932787136	1.7572068148873		NCS1	7	6	-0.140741639650305	-4.30231298267625		MPZL1	8	7	1.53421644040302	-2.91278709232591		PTPRA	9
ADAM8	1	1	-0.892596178567847	-2.6909786587932		ATL3	2	1	3.10920972295956	-0.953572166559921		CORO7	3	2	-1.53034632734104	5.29397379100539		GRB2	4	3	4.99254185625271	-2.66142858326219		PCDHA11	5	4	3.09638173052029	9.02311073482253		PEX11G	6	5	4.7068153090115	2.3365892642758		NEK6	7	6	-0.0410709910754763	-4.40290273487352		MTR	8	7	1.58653335937218	-3.11304534733079		PXMP4	9
ADAMTS12	1	1	-3.60903065732761	-1.86133254825853		ATN1	2	1	2.67666418024258	0.987502800824418		COTL1	3	2	-0.38501637510105	4.16732870280959		HDAC5	4	3	4.67405802675442	-2.17225064098619		PCDHA12	5	4	3.09652394720272	9.02466999232985		PIH1D1	6	5	4.99780542322353	1.79723927617289		NFIB	7	6	-0.138052993333777	-3.67529691517137		NDUFS2	8	7	1.51785609044985	-3.04997648060106		PYGB	9
ADAMTS14	1	1	-3.54189675382419	-2.0016476041057		ATP2A2	2	1	3.52293950983242	1.11476440966345		CREB3L2	3	2	-2.7044886880283	4.01491199672438		HEATR6	4	3	5.0129721827145	-2.65590251743578		PCDHA13	5	4	3.09600228735165	9.02348791301466		PNKP	6	5	5.02216083475308	1.80908841133334		NFX1	7	6	0.311228460752527	-4.26841558277391		NEK7	8	7	1.64755973883824	-3.07009519397996		RAB22A	9
ADAMTS16	1	1	-3.73156016401096	-1.75095642864488		ATP6V1E2	2	1	1.58579123684124	0.491545903088822		CREBBP	3	2	-1.63608544400974	5.16780601680495		HELZ	4	3	5.11609894701199	-2.61728395283006		PCDHA2	5	4	3.09533423849301	9.02194486797072		PPP1R12C	6	5	4.95194012590603	1.83432366192557		NINJ1	7	6	0.0148958630199827	-4.42467464267992		NOS1AP	8	7	1.62981054850773	-2.38581479847215		RALY	9
ADAMTS2	1	1	-3.59540312818333	-1.77051581203722		ATXN2	2	1	3.44366008707241	1.17625399172522		CSAD	3	2	-0.855349712884864	3.35494660079695		HEXIM2	4	3	4.55269057222561	-2.12797368824266		PCDHA3	5	4	3.09480959840969	9.02155576884963		PPP5C	6	5	5.04127532907681	1.75774161756255		NOTCH1	7	6	-0.181510620630225	-4.15911735355638		NVL	8	7	1.5318521104093	-2.98405994236253		RBM38	9
ADAMTS3	1	1	-0.217058473146399	-1.42977346241258		B3GAT3	2	1	3.98446876474575	-0.427999151346908		CTCF	3	2	-0.316645794427832	4.27316747844435		KCTD2	4	3	4.98176938959316	-2.71924556553148		PCDHA4	5	4	3.09526533552364	9.02224527538039		PRKD2	6	5	5.03551847406582	1.80186102032877		NOXA1	7	6	-0.177049928224524	-4.30362380802415		OPN3	8	7	1.38938498602168	-2.94877303898119		RIN2	9
ADAMTS4	1	1	-0.0766997866992556	-3.06363929569505		BACH1	2	1	2.53462941118435	0.0292223566792149		CUL1	3	2	-2.66807835630222	3.9939545267842		LASP1	4	3	4.56162554689602	-1.92884768306993		PCDHA5	5	4	3.0940530962582	9.02051435649611		PRMT1	6	5	5.05713946291165	1.80089196801402		NR6A1	7	6	0.173653192007104	-4.24690355121873		OTUD7B	8	7	1.43658641830937	-3.0563236600139		RPRD1B	9
ADAMTS7	1	1	-3.15807860425754	-2.25697387516283		BAD	2	1	4.10078341432766	-0.437499178049789		CUX1	3	2	-2.63993304303928	3.92872058093764		LIG3	4	3	4.58109170862393	-1.90852035343431		PCDHA6	5	4	3.09492737718777	9.02214609325148		PRR7	6	5	4.64358789392666	2.31435923516966		ODF2	7	6	-0.0528098874454104	-4.3818646794536		PARP1	8	7	1.57865340181545	-2.93199409305833		RRBP1	9
ADAMTS9	1	1	-2.85938399366184	-2.04203428089403		BAG3	2	1	3.00090391107754	-2.51240409672044		CYBA	3	2	-1.64639776281162	3.55028175056197		LRRC45	4	3	4.92741329141812	-2.77546991169237		PCDHA7	5	4	3.09460539289669	9.02005706966139		PRX	6	5	4.85155994363979	1.85594947874762		PHF2	7	6	0.0518563456173338	-4.44291986286424		PI4KB	8	7	1.50655685284094	-3.00405753910326		RTEL1	9
ADAMTSL1	1	1	-3.13925545743748	-1.71416009723924		BAZ2A	2	1	3.41791350313381	1.13286938011862		DBNDD1	3	2	-0.297741227663001	4.20313535869338		MAP3K14	4	3	4.23493439623074	-2.19930208980821		PCDHA8	5	4	3.09487814375118	9.02125965297438		RPL10	6	5	4.14386922785	2.22351901471831		PTGES2	7	6	-0.102237992799719	-4.36806119739793		PIGC	8	7	1.52747476764874	-2.98638595402025		SAMD10	9
ADAMTSL2	1	1	-2.84521477750584	-1.54282463848375		BCL7A	2	1	3.54519683786587	1.23057903588034		DCUN1D3	3	2	-1.61918156675144	5.18332921207167		MAP3K3	4	3	5.03312904306606	-2.79710067569994		PCDHA9	5	4	3.09535676904873	9.02235637843825		RPL18A	6	5	4.19105536409573	2.28365491569258		PTRH1	7	6	-0.114586763894995	-4.34346975147508		POGK	8	7	1.43269884691493	-3.04237617313646		SDC4	9
ADAMTSL3	1	1	-2.55483429960056	-0.896311414835678		BCL9L	2	1	3.86425215669827	-0.539765489695297		DDIT3	3	2	-2.25431054166599	3.48167024791457		MED1	4	3	4.5631533331509	-1.87573541462205		PCDHAC1	5	4	3.09569413133816	9.0227984064839		RPL22	6	5	4.1475997633572	2.19487087667204		QSOX2	7	6	-0.0871407323245608	-4.38757861912035		POGZ	8	7	1.46088258095936	-3.09587014972948		SLC23A2	9
ADAMTSL4	1	1	-0.904743843591651	-2.28135217487596		BCOR	2	1	3.49465925165371	-0.520752561686264		DNAH1	3	2	-0.891861610925635	3.3212113255284		MED13	4	3	5.1087346739407	-2.62857736408495		PDXP	5	4	0.752867884122888	7.06456314265944		RPL23A	6	5	4.20611578890041	2.18352739751555		RALGDS	7	6	-0.0818061166171633	-4.52729238331102		PRCC	8	7	1.53748796054081	-2.98258937656663		SLC35C2	9
ADAMTSL5	1	1	-1.76932137540623	1.14977638662077		BMPR1A	2	1	3.01105160185055	-2.42766631901048		DNAJB6	3	2	-2.70400851300999	4.02143012225844		MED24	4	3	4.5757015413876	-1.92810405552171		PEX26	5	4	0.675576097452203	7.15095554530837		RPL28	6	5	4.53254634805874	2.05080022156455		RALGPS1	7	6	-0.10147624543949	-4.40323509037279		PSEN2	8	7	1.43581085943536	-3.04240287601732		SLC9A8	9
ADAP1	1	1	0.141506022893945	-0.341518056986557		BRI3BP	2	1	2.46198243566708	-1.36704410373949		E4F1	3	2	-1.46569102338596	5.14135943591811		MLLT6	4	3	4.46324760385708	-1.84870661556505		PI4KA	5	4	0.668960697137872	7.18564783275343		RPL36	6	5	4.23872429796414	2.2144197696469		RAPGEF1	7	6	-0.0442600779895388	-4.41402686893724		RASAL2	8	7	0.980519360982934	-2.80445064365648		SNX5	9
ADARB2	1	1	-1.27288382581516	-0.915445936320053		BRWD1	2	1	2.74112696119503	0.141967164876236		EEF2K	3	2	-1.67523139051243	5.17759524524428		MLX	4	3	4.67792756029324	-2.09994996845506		PISD	5	4	0.68447620340542	7.12272630870558		RPL37A	6	5	4.18878156610684	2.14890663564421		RCL1	7	6	0.282628364049951	-4.23235572635912		RNF2	8	7	1.6132435567017	-3.0722943669536		SRC	9
ADCY1	1	1	-2.09169357351108	0.284166442754044		BTRC	2	1	2.97891075082974	-2.47783912479662		ELMOD3	3	2	-0.790675335443457	3.07316731155135		MRPL38	4	3	5.00372750230984	-2.82265819370531		PITPNB	5	4	0.640121705019037	7.19689594447829		RPS9	6	5	4.2433736986752	2.17148278892256		RGS3	7	6	-0.158257179773291	-4.00477994739793		RNPEP	8	7	1.49725535430864	-3.03224052250169		SS18L1	9
ADCY2	1	1	-3.58202784589573	-0.597369564173446		C11orf49	2	1	3.36335498758511	-0.545060289499984		EME2	3	2	-1.30239837697788	4.47181855380751		MTMR4	4	3	5.06954152055935	-2.70930208027147		PLA2G6	5	4	0.43773890205578	7.08300863445021		SAE1	6	5	5.02642518945889	1.78100766480185		RNF38	7	6	0.266399807416955	-4.27989019214891		RPRD2	8	7	1.49681007780985	-3.06766666233324		STK35	9
ADCY3	1	1	0.726010627233545	0.954218315484299		C11orf68	2	1	4.05672318407253	-0.446409595606552		EMP2	3	2	-1.55308120778843	4.94376884639479		MXRA7	4	3	4.99067980714993	-2.80704749882005		PLXNB2	5	4	0.563160485708276	7.17708336055495		SAMD4B	6	5	5.09893614717678	1.7594384872935		RXRA	7	6	0.0015388197536863	-4.38634980976366		SCCPDH	8	7	1.44045066007332	-2.51294387638353		STK4	9
ADCY5	1	1	-3.10468571714207	-0.875739706156478		C11orf80	2	1	4.00437433191494	-0.441975486872421		EPHB4	3	2	-2.4633576207523	3.78151761234023		MYO18A	4	3	4.57834298082546	-1.95492376148485		POLR2F	5	4	0.698593265497247	7.09598957240797		SIPA1L3	6	5	5.08366972871975	1.76078599930026		SCAI	7	6	-0.06958668760105	-4.46096576511644		SCYL3	8	7	1.52504762181	-3.03433765232347		TAF4	9
ADCY7	1	1	-1.26179426244541	-2.91669620334886		C11orf95	2	1	3.83456713625149	-0.422482503054367		ERI2	3	2	-1.60561674169346	5.12692938983656		NAGLU	4	3	4.63907582231716	-1.99944795429491		PPARA	5	4	0.551107890092889	7.22653089702345		SIRT2	6	5	5.0699585146542	1.81982624769427		SEC16A	7	6	-0.0675116114978396	-4.40366710483812		SDCCAG8	8	7	1.64760481485085	-3.09035838901781		TASP1	9
ADCY8	1	1	-2.17527406743809	-0.259040606615768		C12orf60	2	1	3.25512237020687	0.266640769841446		ESYT2	3	2	-2.67349427274509	3.98070846736647		NARF	4	3	5.03289157816128	-2.85398162662767		PPIL2	5	4	0.625014192544977	7.17895590007521		SIX5	6	5	4.8938098616238	1.77451761305548		SET	7	6	-0.0187968545322024	-4.39173568546556		SHC1	8	7	1.54877208837227	-2.88972486316942		TCEA2	9
ADD1	1	1	1.68255350657658	-1.56986559688829		C2CD2	2	1	2.74355382391171	0.107444989087357		EXOC4	3	2	-2.65468161634251	3.97675024211623		NBR1	4	3	4.68795973726467	-2.14370621502183		PPM1F	5	4	0.642030424558679	6.88743816554762		SPHK2	6	5	4.9304538435574	1.94250823796011		SH3GLB2	7	6	-0.115487509286841	-4.40986169636034		SLC39A1	8	7	1.4884729898806	-2.92833675205492		TCFL5	9
ADD2	1	1	-1.99747388891025	0.803937422635331		C2CD3	2	1	3.876615113699	-0.518313062784896		FAHD1	3	2	-1.53585618070408	5.17218886554457		NEK8	4	3	4.55295092531399	-1.91858424007677		PRR5	5	4	0.499497599088708	7.13184820354201		STRN4	6	5	5.10246927210049	1.74651240051009		SLC27A4	7	6	-0.136561565912207	-4.35096849262498		SMG7	8	7	1.45447343506769	-3.02891696750902		TGIF2	9
ADORA1	1	1	-0.779310160196265	-1.8445304757335		C2orf42	2	1	1.70266682573513	0.502366887929215		FAM156A	3	2	-0.834597521341284	3.37022255599715		NF1	4	3	4.61516076990322	-1.88961280643724		RANGAP1	5	4	0.685589796983758	7.11990343272902		SYMPK	6	5	5.00907594629482	1.81786547839858		SLC44A1	7	6	0.047086781942407	-4.2394029027202		SMYD2	8	7	1.55296838947491	-2.88769019901537		TMEM189	9
ADORA2A	1	1	-1.83901827863499	-2.76009048282884		C2orf68	2	1	1.78370953270153	0.572411405446305		FAM193B	3	2	-0.841005735910376	3.34413813293196		NFE2L1	4	3	4.80139715143398	-2.34519041836046		RNF185	5	4	0.620080894910852	7.21396194637038		TEAD2	6	5	4.57835204073147	1.7553920024655		SMARCA2	7	6	0.336032456838647	-4.2274662381389		SMYD3	8	7	1.57460037537769	-2.86282266437791		TOP1	9
ADPRHL1	1	1	-3.99180501035496	-0.199425829050766		C2orf76	2	1	2.07957339950756	0.51193998992659		FASTK	3	2	-2.61559956601902	3.90415798366286		NMT1	4	3	4.67800790735439	-2.10319532215379		RNF215	5	4	0.655303782903711	7.03058992564894		TGFB1	6	5	4.495347327673	1.49888139456726		SNAPC4	7	6	-0.099864655054053	-4.39066375553392		SNAP47	8	7	1.55904666253285	-2.98551191150926		TPD52L2	9
ADRA1D	1	1	-1.95486085943027	-0.587888610956893		CAB39	2	1	1.89706880518154	0.191798197629227		FBXL19	3	2	-1.60489934018894	5.19811998546339		NPLOC4	4	3	4.95859009691433	-2.76665796100877		RTN4R	5	4	0.502550727808038	7.14595876872755		TMEM143	6	5	4.95623380609707	1.89425899327017		SNX30	7	6	0.0186472601528562	-4.30488313495897		SNX27	8	7	1.45411093079404	-3.08928169071458		TRPC4AP	9
AEBP1	1	1	-3.5752834611301	-1.73633540928148		CACNB3	2	1	3.1668344206448	0.845413255097641		FBXO24	3	2	-2.33198397687717	3.58798991382338		P4HB	4	3	4.70964533754543	-2.62122644245409		SAMM50	5	4	0.596545524084131	7.14270149409987		TMEM189-UBE2V1	6	5	4.55918342539028	2.21466063201643		SPIN1	7	6	0.0316708750362791	-4.40364373981737		SOX13	8	7	1.14514440962032	-2.71569837391161		UBE2V1	9
AFAP1L1	1	1	-2.80395548871799	-2.42081941425584		CAMK2G	2	1	2.85199875303463	-2.35280383884691		FBXO31	3	2	-0.367041044748267	4.2259667986653		PCGF2	4	3	4.54855472513394	-1.90734399616502		SF3A1	5	4	0.608558840238611	7.14622675121046		TMEM91	6	5	4.57584602304653	1.61707810178615		SPTAN1	7	6	-0.0451025300387942	-4.24148286640428		SRGAP2	8	7	1.33935354568915	-3.00863946735643		UCKL1	9
AFAP1L2	1	1	-1.63316624692722	-0.889688623545394		CAPN1	2	1	4.06669861742214	-0.475082052347885		FHOD1	3	2	-0.505670481241187	4.05358802020766		PCTP	4	3	4.69573981233791	-2.32002462208055		SFI1	5	4	0.515218383752862	7.09787260234572		TOMM40	6	5	5.12375027605251	1.72397603333212		ST6GALNAC4	7	6	0.0888992018337644	-4.00841487705492		TAGLN2	8	7	1.25345439382748	-2.72922910511278		VAPB	9
AFF1	1	1	1.49917100288824	-1.23462189495348		CAPN10	2	1	1.99380738207058	-0.0440088635661464		FTO	3	2	-0.341937594926795	4.24319420993544		PCYT2	4	3	4.9599993891354	-2.81851114094041		SH3BP1	5	4	0.637154049360315	6.91327463329054		TRAPPC6A	6	5	4.94368392893032	1.85610728204466		ST6GALNAC6	7	6	-0.0388387971286379	-4.39501870929979		TARBP1	8	7	1.52591337927536	-3.11651338398241		XRN2	9
AFF2	1	1	-2.36853378347202	-0.389114153979049		CBL	2	1	3.78269655176357	-0.436015737650619		GABRR2	3	2	-0.928240948236426	3.25055228412367		PDK2	4	3	4.67923123308376	-2.26592482387804		SLC25A1	5	4	0.630165941202203	7.22634922206618		USF2	6	5	5.10252577730374	1.78151941538073		STOM	7	6	0.364141053640405	-4.29646266758226		TARS2	8	7	1.49321577616886	-3.10862411319994		YTHDF1	9
AFF3	1	1	-2.02530925802036	-0.944182527659164		CCDC6	2	1	2.89870304533199	-2.38887847721361		GALNS	3	2	-0.323783808267554	4.27358018100478		PGAP3	4	3	4.54664999910549	-1.91557158291124		SLC35E4	5	4	0.618695146524469	6.91002355754591		VASP	6	5	5.06410080858425	1.75570900976874		STRBP	7	6	-0.143955641305884	-4.31641448795579		THBS3	8	7	1.45234940119938	-3.12776197254442		ZCCHC3	9
AGAP2	1	1	-1.81240838102146	-2.91236461460374		CCDC91	2	1	2.64939028688625	0.945702421071305		GALNT11	3	2	-2.67819636396213	3.97345505893446		PGS1	4	3	5.05399758287624	-2.80108178913377		SMARCB1	5	4	0.672526068174402	7.18101249873854		YIF1B	6	5	4.90603382059292	1.88143716991164		STXBP1	7	6	-0.00152009061618674	-4.32556499302171		TIPRL	8	7	1.57207824953751	-3.00249399006151		ZFP64	9
AGBL1	1	1	-4.01298134855076	-0.137024295923935		CCDC92	2	1	3.46727520891384	1.22034563362814		GAS8	3	2	-0.366019659555396	4.20381318271376		PHF12	4	3	4.54500753351406	-1.90986169636034		SNAP29	5	4	0.626165694677392	7.14411054790236		ZC3H4	6	5	5.07884079881863	1.80148233711935		TBC1D2	7	6	-0.0102357201938235	-4.03674806415819		TMEM9	8	7	1.46690468036489	-2.93157543003343		ZGPAT	9
AGBL4	1	1	-1.07458394101902	2.36078809440352		CCND1	2	1	4.16708833643154	-0.667402876017318		GCC1	3	2	-2.65400212339207	3.96283589542128		PIP4K2B	4	3	4.56139928766445	-1.91251243412279		SNRPD3	5	4	0.66362739273266	7.13541256129958		ZFPM1	6	5	4.46938306757168	2.21060483396269		TJP2	7	6	0.0796890921230711	-4.28085578739427		TPM3	8	7	1.53651443787769	-3.01714004337572		ZHX3	9
AGPAT4	1	1	-3.4501933389072	2.552320110204		CCNY	2	1	2.84655792185024	-2.07177532970689		GFER	3	2	-1.5394381814365	5.1893547648213		PLEKHH3	4	3	4.34245402284817	-1.98127926647447		SREBF2	5	4	0.650653964960138	7.13713585078932		ZNF296	6	5	4.83240324922756	1.94977395475127		TLE1	7	6	-0.0645864539508425	-3.97334445774339		TTC13	8	7	1.56992528506474	-2.999179971812		ZMYND8	9
AGR2	1	1	0.215361184560815	-0.57787455379747		CD151	2	1	3.33538121648983	-0.606171739695297		GFOD2	3	2	-0.403585963762244	4.17011057079054		PLEKHM1	4	3	4.74039799638943	-2.27482141315721		SUN2	5	4	0.557880646669427	7.03086744487502		ZNF444	6	5	4.93548089929775	1.87488915264822		TPRN	7	6	-0.167749577081641	-4.29449905216478		UCK2	8	7	1.52092537947849	-2.98666585743211		ZNF217	9
AGRN	1	1	0.887843675100366	2.03750165045477		CD59	2	1	3.39070314832882	-0.594619167444931		GIGYF1	3	2	-2.50729458860203	3.84868823230483		PNMT	4	3	4.43299872347073	-1.83293713390611		TBC1D10A	5	4	0.599903113328973	7.1415899866841		ZNF507	6	5	5.07937867113308	1.81520596385218		TRAF2	7	6	-0.0305696063403689	-4.4023872739055		URB2	8	7	1.50107696571306	-2.9657737141826		ZNF341	9
AHCYL1	1	1	1.39682515443222	1.83048008620955		CD82	2	1	3.30122370191769	-0.783720625040756		GLG1	3	2	-0.336086206949195	4.23213468730666		POLDIP2	4	3	4.61994630762295	-1.9333292371013		TBC1D22A	5	4	0.553707606279413	7.10443292796828		ZNF552	6	5	4.63304907747463	1.89778699219443		TTLL11	7	6	-0.0208815865878664	-4.37542499363206		USF1	8	7	1.50279629149393	-3.00749982654832		ZNF512B	9
AHCYL2	1	1	-2.95131342939182	0.770880209805741		CD9	2	1	2.72528643079952	0.986995863320603		GLIS2	3	2	-1.59419100812717	5.13056288898207		PPM1D	4	3	5.0638082689877	-2.72297824680589		TCF20	5	4	0.613065309011499	7.15930830180861		ZNF580	6	5	4.75317842432217	2.08384119212843		TXN	7	6	0.052132791959802	-4.25977338611864		ZBTB7B	8	7	1.60455385514454	-2.7870627766826
AHDC1	1	1	1.20292109914974	2.33100877940871		CDK4	2	1	3.39828879305081	1.10167108714796		GLYR1	3	2	-1.62704484990879	5.15390478313185		PPP1R9B	4	3	5.03748495050625	-2.58588041126512		THOC5	5	4	0.638275629961053	7.17375026881911		ZNF581	6	5	4.50866372057156	2.01667382061697		UBE2R2	7	6	0.196494883977929	-4.29969085514329
AHNAK2	1	1	-0.164315038240393	-1.86006130039476		CDKL5	2	1	2.37953007885174	-1.31419028103136		GNB2	3	2	-2.53940456441685	3.84441219508864		PRKAR1A	4	3	5.15179092355923	-2.56813920795702		TMEM184B	5	4	0.660498208486596	7.12907921016432		ZNF586	6	5	4.63204605051235	1.94230722129561		USP20	7	6	-0.0421070390109621	-4.41756452381395
AIF1L	1	1	-0.892719202554663	-0.549691570399032		CDYL2	2	1	2.3717836804028	-1.36564697086595		GTF2IRD1	3	2	-2.53693192533298	3.83881651103713		PRPSAP1	4	3	4.97023970552639	-2.79091275989793		TNRC6B	5	4	0.582965023004571	7.11717306316115		ZNF628	6	5	4.81387001939968	2.05455775797583		VAV2	7	6	-0.0253768496875368	-4.40525401890062
AIG1	1	1	-3.52722876600071	2.67864714801527		CEBPZ	2	1	1.85543919273571	0.565173851849808		GTF3C1	3	2	-1.62835853627964	5.16953431308485		PSMD3	4	3	4.57204420038418	-1.89687479793809		TOB2	5	4	0.623242027246515	7.18880926311232		ZNF771	6	5	4.59118658968166	2.21707718312956		WDR5	7	6	-0.0530342393283449	-4.38535131275438
AIMP2	1	1	-2.14860146573826	2.58620821178175		CELF1	2	1	3.59060079523281	-0.603751552698837		HAGH	3	2	-1.47868888906284	5.2477956885121		RAB40B	4	3	5.06348068186001	-2.86128581821703		TOM1	5	4	0.613393313371698	7.18178402126051		ZNF787	6	5	4.91018588014797	1.88197504222609		WNK2	7	6	-0.206381493127783	-3.99422086536668
AIRE	1	1	-1.52927797368809	-1.62125672161363		CFL1	2	1	4.03642827936367	-0.430990112421737		HCFC1R1	3	2	-1.49417655996128	5.24521766841628		RAB5C	4	3	4.61487895914272	-2.04157604038499		TPST2	5	4	0.657916135274927	7.17236934840895		ZNF837	6	5	4.7393909163113	2.28937952459074		ZMYND19	7	6	-0.0599425368671023	-4.40401901066087
AJAP1	1	1	-1.59763615659519	0.114058482053055		CFLAR	2	1	1.98256678053097	-0.109726083872543		HIP1	3	2	-2.48012607625767	3.74660073459364		RAD51C	4	3	5.08327133127407	-2.54937995731615		TRABD	5	4	0.509844071352044	7.09289346873976
AK2	1	1	1.31782662787394	2.17244135081984		CHD4	2	1	2.65535838075832	0.955603110196366		HIPK2	3	2	-2.62227671674534	3.93042646587111		RARA	4	3	4.55713374086575	-1.92390097439073		TRIOBP	5	4	0.628862745248834	7.14867960155226
AK5	1	1	-2.86682837537571	-0.725038660166488		CHFR	2	1	3.40592545934872	1.1035111123345		HSF4	3	2	-0.736035757577857	3.61974416911818		RECQL5	4	3	5.04750067659573	-2.63013614475511		TST	5	4	0.494736439668695	7.2374504679463
AK7	1	1	-1.12051408819004	2.28227757156111		CHKA	2	1	4.09941918321804	-0.535357130167709		IFRD1	3	2	-2.58612340024753	3.92407070338942		RPS6KB1	4	3	5.08044821687893	-2.63500274479173		TTC28	5	4	0.604574508153955	7.12635790050246
AKAP12	1	1	-2.3440446191196	-0.940112484095321		CKAP4	2	1	3.42031342455105	1.10968484223105		IFT140	3	2	-1.63670270971104	5.13718687236525		RPTOR	4	3	5.0000966257687	-2.74782337009691		TTLL1	5	4	0.722320742094079	6.93670068919875
AKAP6	1	1	-3.4413780503635	-0.341362846491561		CKAP5	2	1	3.66845352121548	-0.494424951670394		IKBKE	3	2	-1.56475656560703	3.38560699165083		SAP30BP	4	3	4.98946721025662	-2.73345626652025		TTLL12	5	4	0.588795132123987	7.09018312633254
AKNA	1	1	-1.62624137929722	-2.83456720173143		CLASP1	2	1	1.73513699241833	0.280656206013932		IL11RA	3	2	-0.723533802545508	2.98807703197218		SEC14L1	4	3	4.86066276498989	-2.83727945148729		TXNRD2	5	4	0.579435414754907	7.16613136470534
AKR1B15	1	1	-0.0100563102130495	0.866935300233139		CLIP1	2	1	3.4917844004269	1.19271441042639		IMMP2L	3	2	-2.59603446058079	3.96689950168349		SKA2	4	3	5.07125980325894	-2.52892316639207		UBE2L3	5	4	0.623429543458978	7.15649925410963
AKR1D1	1	1	-1.16367452672764	0.499117838742508		CLNS1A	2	1	3.75922996469692	-0.446993721125351		IMPDH1	3	2	-2.63949196866794	3.96274577319838		SLC26A11	4	3	4.99151498743252	-2.70119680225633		YPEL1	5	4	0.667382723772088	6.93424831569411
AKT3	1	1	-2.34204094938084	-0.93970669567369		CLOCK	2	1	2.37615496584133	-1.26987422764085		IMPG1	3	2	-1.11304276517673	3.28178738296248		SLC38A10	4	3	4.80301148363308	-2.66768850147508		ZBED4	5	4	0.581254727327386	7.10744320094801
ALDH1A2	1	1	-2.50809138349338	-0.634333027003036		CLPB	2	1	3.83741051622585	-0.555532110331283		IQCK	3	2	-1.64190905622288	5.16689096629836		SLC39A11	4	3	4.71600801416592	-2.6928154355266		ZC3H7B	5	4	0.618144399606744	7.12907110393263
ALDH1A3	1	1	-1.27549856237217	-0.435291183588729		CNNM2	2	1	3.02718681760983	-2.35623468220018		ITPRIPL2	3	2	-1.51899641088291	5.00175510585524		SLC9A3R1	4	3	4.67478115030483	-2.69887651264452		ZDHHC8	5	4	0.622086770021478	7.15238414943434
ALDH1L1	1	1	-0.130187683618506	-0.0629835253932338		COBLL1	2	1	1.56566599675373	-0.302084339258895		JMJD8	3	2	-1.63914888433262	5.19295369327284		SMARCD2	4	3	5.03016430803494	-2.64915765583299
ALDH2	1	1	-1.53222673467441	-1.11501659214281		COMMD1	2	1	1.9336419171925	0.567806350590958		KCTD7	3	2	-2.35459106496616	3.84201203525282		SMURF2	4	3	5.08266121813015	-2.67678464710496
ALDH3B1	1	1	-0.0764446788196169	-0.437700880167709		COMTD1	2	1	3.07765907713131	-2.32250632107042		KIAA0513	3	2	-0.462356501138648	4.09704719722487		SPAG9	4	3	5.15271479555325	-2.55064500629686
ALDH3B2	1	1	0.0153936810131468	-0.814355028269516		COPS7B	2	1	1.97539753385739	0.0396473282597203		KIAA0556	3	2	-1.63557761243626	5.1490727537892		SPATA20	4	3	4.4969125456448	-2.26531113445543
ALDH4A1	1	1	-0.450147204912146	0.329234468343033		COPZ1	2	1	3.38837761350826	1.09927194059111		KIAA0895L	3	2	-0.693155937707862	3.70165239513136		SPHK1	4	3	4.6476751036282	-2.63979209720872
ALDOA	1	1	0.407191700422326	1.7040755474589		CORO1B	2	1	4.02131874033169	-0.401304138300643		KIF22	3	2	-1.42636888555332	5.02024041354872		SPOP	4	3	5.0198310083981	-2.50292362034105
ALDOC	1	1	0.485791451417962	1.63617691263772		CORO1C	2	1	2.46339899965481	-0.592914474604354		KIFC3	3	2	-0.430118136918982	3.78860603511549		SSH2	4	3	4.54605252214626	-1.99522699177049
ALG14	1	1	1.32573581405834	2.20505123079039		COX7A2L	2	1	1.91099632450298	0.495853888394608		KLHDC4	3	2	-0.402112656152686	4.18450795352675		STARD3	4	3	4.52388746210293	-1.89548457920335
ALG1L2	1	1	-1.36526697210117	1.30019550264098		CPEB3	2	1	3.01556271978573	-2.44395269214891		KLHL36	3	2	-0.420006924188574	4.18266235530592		STRADA	4	3	4.99223644205288	-2.68342460453294
ALK	1	1	-1.988530331171	-1.33377517521165		CPT1A	2	1	4.13297016092495	-0.558405769465194		KRBA1	3	2	-2.59350531629368	3.97595606982924		STXBP4	4	3	5.11218149133877	-2.50793470203661
ALOX5	1	1	-1.00462668470188	-2.695966375468		CRADD	2	1	3.37381584116177	1.1241504424832		LENG8	3	2	-0.930683784997901	3.39626680553175		TAF15	4	3	4.62934381433682	-1.98796166240953
ALOXE3	1	1	-0.439735584772071	-0.174823773501144		CREB1	2	1	1.90929598280148	0.112382280232682		LHX4	3	2	-0.906826429880103	3.19327734649397		TBCD	4	3	5.0279651350613	-2.76800168812059
ALPK1	1	1	1.5603304720755	-1.30753816425584		CRY1	2	1	3.32579976984219	1.04830645263411		LIMK1	3	2	-2.64670746854587	3.90684615314223		TEX14	4	3	5.0244353479977	-2.53348077595018
ALPK2	1	1	-1.74146979383274	-1.86430944263719		CRY2	2	1	3.56451470323757	-0.554067743418441		LITAF	3	2	-1.54076140455051	5.03721510112502		TEX2	4	3	5.08445412584499	-2.68388570606493
ALPK3	1	1	-4.08109515241428	-0.17446662246965		CTBP2	2	1	2.97517711588101	-2.44875730335496		LMBR1	3	2	-2.69464438489719	4.00921951472975		THRA	4	3	4.51724988886074	-1.90121878444933
ALPL	1	1	-1.66912596753879	-1.03905047237657		CTDSP1	2	1	1.93946886726574	-0.0149372941233974		LMF1	3	2	-1.37285345128818	4.94176899135329		TLK2	4	3	5.0803914732571	-2.60886253177904
ALX4	1	1	-1.48140733770176	-0.585454357264267		CTDSP2	2	1	3.38944203325466	1.12760095536925		LONP2	3	2	-0.334697657144507	4.26468669116713		TMEM104	4	3	4.84490949579434	-2.73029578983568
AMMECR1	1	1	-0.313175850427588	-0.194666994211898		CTTN	2	1	4.13650376268582	-0.553803098795639		LUC7L2	3	2	-2.67620413831516	3.99426995456435		TNFAIP1	4	3	4.58572346636013	-1.96013249218248
AMOTL1	1	1	-1.19544213346287	-0.653132808802352		D2HGDH	2	1	2.11364299722866	-0.060543668863998		LUC7L3	3	2	-0.845057421243628	3.32762001693465		TNRC6C	4	3	5.13510591455654	-2.61305106937669
AMOTL2	1	1	-0.226494126832923	-0.703174722788559		DAGLA	2	1	3.78012306162075	-0.248371732828842		MAP1LC3B	3	2	-0.374380879915198	4.24353133380629		TRIM37	4	3	5.15452534624294	-2.55513919651292
AMPD3	1	1	-0.635846548593482	-1.82017101108812		DAZAP2	2	1	3.31702346273617	1.0709472173474		MAPK3	3	2	-1.62158077291294	5.23958026111342		TRIM47	4	3	4.86489731737332	-2.72655214130662
AMZ1	1	1	-2.72473328641697	-1.55662406742357		DCPS	2	1	3.83640272089199	-0.47686137020372		MAPK8IP3	3	2	-1.05376546911045	3.93012510478713		TRIM65	4	3	4.97620112367825	-2.75873721897386
ANGPT1	1	1	-3.11708396009251	-0.224984419939743		DDB1	2	1	3.91472918459133	-0.507329595682846		MAZ	3	2	-1.58760660222813	5.25761901080824		TSEN54	4	3	5.00743586488918	-2.79140437900804
ANGPTL2	1	1	-3.58391755155369	-1.78948701679491		DDB2	2	1	2.90790528722958	-0.529414070246444		MBTPS1	3	2	-0.394573503053626	4.23373924434401		TUBD1	4	3	5.02275855013088	-2.56327213108324
ANK1	1	1	-3.99946253827854	-0.0297652608134609		DEAF1	2	1	3.43975407549099	-0.567971361277328		MC1R	3	2	-0.329216533220252	4.00132499873854		UBE2O	4	3	5.02955467172817	-2.74758352100633
ANK2	1	1	-2.88459628156467	-0.451728714106308		DENND1B	2	1	2.26948118873791	-1.53501976787828		METRN	3	2	-1.61217778257175	5.23647652805067		UBTF	4	3	4.64923340746121	-2.13558090984605
ANK3	1	1	0.884617394887964	-0.749320161936508		DENND5A	2	1	3.04222316213802	-0.363377106783615		METTL9	3	2	-1.6503943734531	5.25738321483351		UNK	4	3	5.02477223344998	-2.81208432972215
ANKFN1	1	1	-2.70216839841648	0.28934489429213		DEPDC4	2	1	3.36260170408444	1.19562123954512		MGRN1	3	2	-1.62243407300754	5.16025744617201		USP32	4	3	5.07823974558071	-2.57205261051439
ANKH	1	1	-1.09628241590305	-0.777132881281601		DGKD	2	1	2.01858843036846	-0.0028222924449306		MKLN1	3	2	-2.63864510587498	3.9507883662007		USP36	4	3	5.02977926202969	-2.73880018055223
ANKRD17	1	1	1.69556058117108	-1.34861434757494		DGKH	2	1	2.39319796034054	-1.39647616207384		MLYCD	3	2	-0.365670376337012	4.22352348506667		VEZF1	4	3	5.07626611658291	-2.63234962284349
ANKRD23	1	1	-4.07977717450901	-0.122840059397445		DGKZ	2	1	3.57582313486294	-0.585629356501327		MMP15	3	2	-0.212747507608374	4.09303365886427		WBP2	4	3	4.96488720842556	-2.76448167621873
ANKRD29	1	1	-1.01549547246738	-0.798924339411483		DHCR24	2	1	3.12192685075955	-0.0687936669566493		MPG	3	2	-1.53761666349216	5.29020367801405		WIPI1	4	3	4.75493437715725	-2.75147260486864
ANKRD34A	1	1	-0.220144205606421	1.52468484133698		DHCR7	2	1	3.37414426275448	-0.198563945887313		MPV17L	3	2	-1.54733126691624	5.08222185313918		XYLT2	4	3	4.70850021311001	-2.39501227199815
ANKRD55	1	1	-2.07713549665256	-2.50205577671312		DIP2A	2	1	2.77885121771053	0.165312516095414		MVD	3	2	-0.372235589540442	4.1978312605641		YPEL2	4	3	5.0646398729916	-2.54819644748949
ANKRD6	1	1	-3.42616122297092	2.65204333007552		DIP2B	2	1	3.42853958078579	1.09834371745802		MVP	3	2	-1.4928871922855	5.0561886900685		ZNF652	4	3	5.05175668665127	-2.58167375385545
ANKS1B	1	1	-2.62496178678318	-0.463785541651474		DIP2C	2	1	2.77743107744412	-1.98227514087938		MYO15B	3	2	-0.901664190805396	3.29460655391432		ZNHIT2	4	3	4.5259595579739	-1.7633880501964
ANO1	1	1	-1.52784674695774	-1.1455205804088		DIS3L2	2	1	2.00884986587719	0.0136176222584385		N4BP1	3	2	-0.301320844209632	4.27716075122572
ANO2	1	1	-2.74987118772312	-2.49730790912889		DLG5	2	1	2.873969501936	-2.54243196308397		NAA38	3	2	-2.63430016568943	3.94365440547682
ANO4	1	1	-2.29408734372898	-0.332623494265304		DNAJB12	2	1	2.98355109163479	-2.46475995838426		NANOG	3	2	-2.28763382962986	3.62033997714735
ANO6	1	1	-1.88506310514255	-1.96922386944078		DNAJC1	2	1	2.77327770658688	-2.04295004665636		NDE1	3	2	-1.55537050298496	4.95218692958571
ANO7	1	1	-1.74772041372105	-0.100354803202377		DNAJC4	2	1	4.06182939478115	-0.391672504542099		NDUFB10	3	2	-1.55382555059238	5.24262295901991
ANO9	1	1	0.842389351808587	-0.875448358652816		DNMBP	2	1	3.03590566583828	-2.41103137790941		NME4	3	2	-1.56822364858433	5.29374014079787
ANPEP	1	1	-0.700964861429175	0.609176086785569		DNMT3A	2	1	1.8245567149754	0.521433579327836		NPRL3	3	2	-1.58215301564976	5.20116101443984
ANTXR1	1	1	-3.52799361280247	-1.75791562855028		DNPEP	2	1	2.00482071109966	-0.0297119742610317		NRF1	3	2	-2.59193509153171	3.91565524280287
ANTXRL	1	1	-1.3326031499271	1.1282943063996		DOCK1	2	1	2.9505303568478	-2.52414668857835		NSMCE1	3	2	-1.57364743284031	5.20395528018691
ANXA13	1	1	-0.588145547426184	0.82615433871962		DPF2	2	1	3.906639880621	-0.387664569018112		NTHL1	3	2	-1.54666560224338	5.29570280254103
ANXA2	1	1	0.093826717817346	-2.05178178608202		DPP3	2	1	4.04739577242092	-0.465484512446151		NUP93	3	2	-0.289940529382666	4.28546987712599
ANXA4	1	1	-0.5359243684177	0.737962233426346		DUSP16	2	1	2.71229547926144	0.978384839894547		NUTF2	3	2	-0.363320403612097	4.23738728702284
ANXA6	1	1	-1.54512017301365	-1.58495367824815		DUSP28	2	1	2.01080889173702	0.0488330000660557		OSBPL7	3	2	-0.822894983804663	2.88929473102309
ANXA8L1	1	1	-0.356683307207068	-0.749871862528549		DYNLL1	2	1	3.2410234875317	0.967721390130295		PABPC1L	3	2	-0.863293343103369	3.32968043029524
AOX1	1	1	-2.32078831723972	-0.811625135538803		DYRK1A	2	1	2.76182348200039	0.163322078587784		PARD6A	3	2	-0.34285157254978	4.17504130542494
AP3B2	1	1	-2.55909936956211	0.889374720456376		ECHS1	2	1	2.95817310281948	-2.45394767582201		PARN	3	2	-1.65343683294102	5.15383492648817
APBA1	1	1	-0.45580666593357	-0.0640785819270473		EHBP1	2	1	1.5160609177585	0.386824356915726		PHKB	3	2	-0.296225481546363	4.2786646956227
APBA2	1	1	-2.25807493261143	0.850192176701798		EHBP1L1	2	1	4.06516653963284	-0.394282591936813		PHKG2	3	2	-1.61384671262546	5.14454947650649
APBB2	1	1	1.38021832623438	-1.50404418766283		EHD1	2	1	3.97600037523464	-0.497106922266708		PHLPP2	3	2	-0.344127469575843	4.24028288066603
APC2	1	1	-2.32392042211338	0.98264722764708		EIF3A	2	1	2.97342807718472	-2.519781244395		PIGQ	3	2	-1.56874936155125	5.15075026691176
APCDD1	1	1	-1.17374938062473	-1.20973051845811		ELK3	2	1	2.62532157369808	-1.09576333820604		PKD1	3	2	-1.47373097471043	5.12105261028029
APCDD1L	1	1	-2.58986490300938	-1.10703958332323		ELK4	2	1	2.42447359033779	-1.3557154065349		PLA2G15	3	2	-0.339095049417456	4.22412573039748
APOLD1	1	1	0.0882973141308225	-2.99833883106493		ELOVL5	2	1	2.9422547287579	-0.205608857271896		PMM2	3	2	-1.67250888875767	5.2197080725453
APOO	1	1	1.23692939349369	1.03188817441679		EML3	2	1	4.01831228204922	-0.267910612223373		PNPLA8	3	2	-2.66985791257664	3.98383818805434
AQP6	1	1	-1.33264415792271	-0.276307237742172		EP400	2	1	3.47671992250637	1.2143743807099		POLN	3	2	-0.853994303262671	3.12794159591414
ARAP2	1	1	1.54198957153515	-1.47575224697374		EPC1	2	1	2.69886083074764	-1.50910605251573		POR	3	2	-2.57440488866611	3.85543118655898
ARHGAP10	1	1	1.54800023802475	-1.24847425281786		ERC1	2	1	2.61776906915859	0.983270513417496		PPP1R3E	3	2	-0.76753705076023	3.50683890521742
ARHGAP15	1	1	-1.4787372880344	-2.92034782230638		ERN1	2	1	2.50510174699978	-1.09377540409349		PRKAG2	3	2	-2.66616623929783	3.9798673266194
ARHGAP18	1	1	-3.55720847181126	2.67887352645613		ESRRA	2	1	3.98335725732998	-0.43131316959642		PRKRIP1	3	2	-2.56043689779087	3.888191329839
ARHGAP22	1	1	-1.27208297780796	-2.76649059116624		ETV6	2	1	2.65928000875668	0.951392995717301		PRMT7	3	2	-0.374125891244849	4.21803032100417
ARHGAP23	1	1	-0.358700089967688	-0.652126443979965		EXOC6	2	1	3.00080258318142	-2.43225253879808		PRRT2	3	2	-0.957977467096289	3.45064066589095
ARHGAP24	1	1	-1.37291591695591	-1.33590067684434		EXOC6B	2	1	2.51916784712032	-1.15966094791673		PSKH1	3	2	-0.320999198472937	4.28178130328871
ARHGAP25	1	1	-1.50921505025669	-2.84467376529954		EXT2	2	1	3.38328964182095	-0.57396282017015		PTCD1	3	2	-2.52081077626987	3.8179005259297
ARHGAP27	1	1	-0.680486374414405	-2.25210679828905		FADS1	2	1	3.14961487718777	-0.0555161362864833		PTPN12	3	2	-2.67168324521824	3.96907817065932
ARHGAP28	1	1	-1.49891274503513	0.145583617093338		FADS2	2	1	3.2255992359753	-0.0312924510218959		RAB11FIP3	3	2	-1.55034630826755	5.23230706393935
ARHGAP31	1	1	-2.5313770108585	-2.53424896061204		FAM160B1	2	1	2.9736552900906	-2.44599117100023		RAB26	3	2	-1.61387794545933	5.20320259273268
ARHGAP4	1	1	-1.41908948949619	1.13005994498946		FAM168A	2	1	2.65640265413479	-1.06001342594408		RAB40C	3	2	-1.55675094655796	5.21135865390517
ARHGAP6	1	1	-1.97409647039219	-0.150034678576217		FAM53B	2	1	2.83547980257229	-2.1194819337108		RABEP2	3	2	-1.48193519643589	5.21531592548109
ARHGAP8	1	1	0.760640687429468	-0.909958494303451		FARP2	2	1	1.97711075016216	0.0304583185932774		RANBP10	3	2	-0.400425606286963	4.16767560184218
ARHGDIG	1	1	-2.28074782422825	0.940710770489945		FASN	2	1	3.11585885950283	-0.0477357035853725		RBM33	3	2	-2.33464830449863	3.77507220447279
ARHGEF10L	1	1	0.1894014544125	-0.247184289095626		FBRSL1	2	1	3.49007589288906	1.25796480715491		RHBDD2	3	2	-2.59533684781834	3.89515815913893
ARHGEF16	1	1	0.603296524965326	-0.858713758585678		FBXL14	2	1	2.6350779003735	0.965913104417099		RHBDF1	3	2	-1.49782555631443	5.10202370822646
ARHGEF19	1	1	0.797704941713373	1.79002830624796		FBXO21	2	1	3.50520474382595	1.06581340968825		RHEB	3	2	-2.66095345548435	3.9863906973622
ARHGEF37	1	1	0.582492894613305	1.10716499626852		FBXW8	2	1	3.42314083048062	1.20717029512145		RPUSD1	3	2	-1.56125419668003	5.23677478969313
ARHGEF38	1	1	0.339852041685144	-0.609300506708847		FCHSD2	2	1	3.89590341516689	-0.419098389742599		SBK1	3	2	0.186384505712549	3.99733387172438
ARHGEF4	1	1	-1.74413531354709	-0.0642252093531948		FER	2	1	2.38808662363247	-1.35661615192674		SH2B2	3	2	-2.71950619748875	3.61670385539748
ARHGEF6	1	1	-1.37913077405735	-2.83112253010057		FEZ2	2	1	1.77066079446034	0.469061362149491		SIAH1	3	2	-0.354115062272986	4.23788248241164
ARHGEF7	1	1	0.775327629529992	-2.21329296886705		FGD4	2	1	2.51739127107815	0.781271087529435		SLC12A4	3	2	-0.442590170419654	4.04395567119338
ARID1A	1	1	1.19375301071362	2.36048512399413		FKBP2	2	1	4.02698165842251	-0.414062274096237		SLC12A9	3	2	-2.50297372869297	3.8265093439839
ARID1B	1	1	-3.53843730024143	2.68067489803053		FMNL2	2	1	1.69612602063374	-0.103281629679428		SLC25A13	3	2	-2.64100688031956	3.94801126659132
ARID5A	1	1	0.200827784025232	-2.93556274235033		FRMD8	2	1	3.95249254175381	-0.379289162752853		SLC37A3	3	2	-2.67057602933689	3.98643385112502
ARMC2	1	1	-1.11409323743626	2.346707391145		FRS2	2	1	3.37683195539669	1.09270344913222		SLC4A2	3	2	-2.63110821775242	3.93036781490065
ARNT2	1	1	-1.32307498983188	-0.685879600641952		GAB2	2	1	3.88165504404263	-0.521538150904403		SLC9A5	3	2	-0.687686377084693	3.83291970432021
ARNTL	1	1	-2.76553004316135	0.0353426808140416		GAPDH	2	1	2.59079379507259	1.11580388486601		SMURF1	3	2	-2.55926459363743	3.83944212138869
ARRB1	1	1	-2.37090557149692	-2.15234960377		GBF1	2	1	2.98838383623318	-2.44253505527757		SND1	3	2	-2.63746254972263	3.97191654384352
ARSB	1	1	-1.31062262586399	-1.69719613849901		GDI2	2	1	2.82128591009335	-2.04758895694994		SNTB2	3	2	-0.275469117677649	4.27443467319228
ARSG	1	1	-1.78506057790562	-0.302498472330795		GFOD1	2	1	2.3938440746899	-1.38171805202745		SNX29	3	2	-1.63900130323215	5.23337899387099
ARSI	1	1	-3.56413310102268	-1.5740877515056		GIT2	2	1	3.493971414053	1.17308630287863		SOX4	3	2	0.189410514318506	3.99203907191969
ARX	1	1	-2.79057639173313	0.456287252309098		GLTP	2	1	3.22004730173306	0.931847977044358		SPG7	3	2	-0.407834702051123	4.20621930301405
ASAP2	1	1	-0.359415703332862	-0.322442186472641		GMPPA	2	1	1.93570626445965	0.0267604464314122		SPIRE2	3	2	-0.35890393785282	4.14579712093092
ASAP3	1	1	-0.41688733629032	1.12222351372458		GNA11	2	1	2.68119067617611	-1.02834571659349		SPSB3	3	2	-1.45431964925571	5.11883865535475
ASB2	1	1	-3.62623160413547	-0.953863990900741		GOLGA3	2	1	3.48504812189297	1.23339216649748		SPTBN5	3	2	-0.890329533136328	3.27383028209425
ASB4	1	1	-3.54034369519993	-0.167088044283615		GOT1	2	1	2.98663575121121	-2.40169490635179		SRCAP	3	2	-1.59590356878086	5.21499382198073
ASCL1	1	1	-2.55586545995518	0.391511666180863		GPC1	2	1	1.60137803026394	-0.0697604542949062		SRPK2	3	2	-2.64822714856907	3.95366512477614
ASPG	1	1	-0.987528496301612	0.664744722249283		GPD2	2	1	1.62925191887573	-0.0445616370417934		SRRM2	3	2	-1.51498621038242	5.01536761462904
ASPH	1	1	0.114677137815515	0.862830447556748		GPR137	2	1	4.08704454370693	-0.447048557398544		SSPO	3	2	-2.23063200048252	3.32293318450667
ASRGL1	1	1	-2.14422028592869	-0.844164026377426		GPR157	2	1	2.32608628936962	-0.911549699900375		ST3GAL2	3	2	-0.333832078493079	4.20804225146986
ASS1	1	1	-0.703665905511817	0.13739119708754		GSTO1	2	1	2.98749679990963	-2.43675626575731		ST7	3	2	-2.62929194501682	3.96256791293837
ASTN1	1	1	-2.82172482541843	0.119954335095658		GSTO2	2	1	3.04279679723934	-2.39792789280199		STUB1	3	2	-1.57389729551121	5.21853314578749
ASTN2	1	1	-2.09085290960117	-0.356120718119369		HDAC4	2	1	2.05652094551281	-0.063159955141769		STX1B	3	2	-0.962981157815894	3.31995855510451
ATF3	1	1	0.256066865407983	-3.12944759189867		HDLBP	2	1	1.94242990680889	0.0668935650608677		SYT17	3	2	-1.48402636579319	4.97487937152602
ATG5	1	1	-3.49355309537693	2.65384231746413		HEBP1	2	1	2.63821715780453	0.918765532376542		TAF1C	3	2	-0.460435324228247	4.07751976192213
ATG9B	1	1	-0.835278921640357	1.72135383129336		HIP1R	2	1	3.45417482324795	1.14852686465002		TAOK2	3	2	-1.53231494954868	5.24404441058852
ATL1	1	1	-2.13253253034397	1.83729259908415		HIPK3	2	1	2.64365560480312	-1.0700549012401		TBC1D10B	3	2	-1.58187215856357	5.23370252788283
ATOH8	1	1	-1.97733610204502	-1.43777407467149		HK1	2	1	2.83882791467861	-2.53120244800829		TBC1D24	3	2	-1.59465950063511	5.14277588069655
ATP10A	1	1	-2.9156793885593	-1.64888442814134		HLCS	2	1	2.76894611784176	0.130718814732804		TCF25	3	2	-0.383261971986731	4.20957432925917
ATP10B	1	1	-0.5584571891193	-0.356916797754989		HNRNPF	2	1	2.95298809477047	-2.41845334827684		TECPR1	3	2	-2.51695960096165	3.83673225581862
ATP11A	1	1	0.663708812677423	-2.11098731815599		HPS1	2	1	2.96508712240414	-2.44505466282152		TFAP4	3	2	-1.54766266874119	5.27688585460402
ATP13A2	1	1	1.14367476769642	2.32182769716002		HS1BP3	2	1	1.47404713847593	0.383993136288895		THOC6	3	2	-1.57559412053867	5.20126448810317
ATP13A4	1	1	-0.224827461755713	-0.772397173044906		HSD17B12	2	1	3.42650610872463	-0.474461210367904		TK2	3	2	-0.389043622529944	4.26325999438979
ATP1A1	1	1	0.0351701445217527	-1.04286087810777		IFNAR2	2	1	2.57689148851589	-0.0492047196605068		TMEM140	3	2	-2.60176127485081	3.87336312473036
ATP1B1	1	1	-0.0548363261584841	-1.06386317074083		IFNGR2	2	1	2.496248549902	-0.142822516558395		TMEM219	3	2	-1.5689050488834	5.18470870197035
ATP2A3	1	1	-1.79592745832249	-2.41908682644151		IGHMBP2	2	1	4.09572202631191	-0.541913641093002		TMUB1	3	2	-2.64772885373875	3.81357012927748
ATP2B1	1	1	-2.5367674165134	-1.09203494846605		IKZF4	2	1	3.44828731485562	1.1384434574864		TNRC6A	3	2	-1.58210223249241	5.10402284801222
ATP2B2	1	1	-1.31477850011631	0.0805848711750645		IL6R	2	1	2.11109668680386	-1.19021691143297		TRADD	3	2	-0.414109402215918	4.09908019244887
ATP2B3	1	1	-1.59866326383396	1.67547156155325		ING5	2	1	2.02056414552883	-0.0248745805003505		TRAF7	3	2	-1.56813829473301	5.25328456104018
ATP2B4	1	1	-0.113532238519629	-2.00547493755601		INPP5A	2	1	2.96922678419308	-2.44508851825975		TRAP1	3	2	-1.54525917104526	5.22581373393752
ATP2C2	1	1	0.439952737772027	-0.775712383387313		INPP5F	2	1	2.99874300428585	-2.48814262211107		TSC2	3	2	-1.51622598699375	5.17632280528761
ATP6V0A4	1	1	-1.21129982999607	-0.443509233591781		INPPL1	2	1	3.94087798067288	-0.547391546366439		TSC22D4	3	2	-2.52756898931309	3.83813725650526
ATP6V0D2	1	1	-0.791680746591529	-2.00829924404405		INSIG1	2	1	3.13530880876736	-0.00124062359117083		TTLL3	3	2	-0.879736118829688	3.31029497325636
ATP6V1B1	1	1	-1.20673816732212	-0.540742767451034		IPMK	2	1	2.56867153116421	-1.2264679795482		TUBB3	3	2	-0.0880444579486452	3.952236043813
ATP6V1C2	1	1	-1.1732329659824	-0.447751892206893		ITPR2	2	1	2.43962747522549	0.825696694257035		TXNDC11	3	2	-1.65075796178623	5.18601070583083
ATP7B	1	1	0.804445332967798	-2.22505606472276		ITSN1	2	1	2.70103568502621	0.111679183842911		TYW1	3	2	-2.57678001455112	3.88899432361342
ATP8A1	1	1	0.968430913173715	-1.15533126652025		JMJD1C	2	1	2.96427494951443	-2.3329361802318		TYW1B	3	2	-2.58091228536411	3.86791335284926
ATP8A2	1	1	-1.17718618444248	-0.972808492777572		KAT5	2	1	3.96276075311855	-0.441682708857284		UBE2H	3	2	-2.66947930387302	3.95658122241713
ATP8B1	1	1	0.591503745996515	-0.900025737879501		KAZALD1	2	1	2.99666447111324	-2.42598832905077		UBE3C	3	2	-2.66434901288792	3.97431050479628
ATP8B2	1	1	-1.62289994291111	0.442833172681107		KCMF1	2	1	1.79317334958271	0.505546080472245		UBN1	3	2	-1.59029501012607	5.16896973788954
ATP8B3	1	1	-1.78944581083103	1.06977622449614		KDM2A	2	1	4.01758415170864	-0.471687687037216		UNKL	3	2	-1.45909612706943	5.10926543414809
ATP8B4	1	1	-1.11362975171848	-2.74835885822557		KDM2B	2	1	3.4913190073605	1.1528184586785		USP10	3	2	-0.358835273302039	4.22271000087477
ATP9B	1	1	0.858643478834192	0.326564776303544		KLF13	2	1	2.63000757166103	-1.72295512020372		USP31	3	2	-1.60431283048435	5.01671181857802
ATRX	1	1	1.58483909734444	0.887232767941727		KLF7	2	1	2.59440285631374	-1.14847577869676		USP7	3	2	-1.64084189466282	5.15876613795973
AUTS2	1	1	-0.442445688760718	-0.0574162131526332		LCLAT1	2	1	1.79437334009365	0.579695331456437		VAC14	3	2	-0.319626026666602	4.25588785350539
AXIN2	1	1	-1.10420911840244	-1.17635573208116		LCOR	2	1	2.53167147108273	-1.3805469399669		VPS4A	3	2	-0.376308732545813	4.26542006671645
B3GALT5	1	1	-0.722025089776953	-0.142712844012008		LDB1	2	1	2.95702237554745	-2.43760598957323		WDR24	3	2	-1.55932872823521	5.15794454753615
B4GALT1	1	1	0.00590819784359109	-2.18711389362596		LDLR	2	1	3.08922917314724	0.0172672146580357		WDR27	3	2	-0.942141943490943	3.31702374160506
B4GALT2	1	1	1.36243708723144	2.29918943584181		LDLRAD3	2	1	2.24192584224896	-0.63397110759996		WDR59	3	2	-0.414975815332373	4.17413126170851
B4GALT6	1	1	1.05708483525471	0.578224825265183		LGR4	2	1	3.04230005212978	-0.381102574465499		WDR60	3	2	-2.67617123655125	3.94858466327406
BAALC	1	1	-1.94928043416782	-1.55061544239305		LHPP	2	1	2.97525865503506	-2.48086990177415		WDR90	3	2	-1.41362374357029	4.93607102573134
BACE2	1	1	-0.495223575151404	-1.28768743335985		LIMA1	2	1	3.33812970586971	1.16730346024252		WDR91	3	2	-2.61981242231174	3.93096934497572
BACH2	1	1	-2.26057498983188	-2.00758279621385		LIMS1	2	1	2.53763980337338	-1.12618602573656		WFIKKN1	3	2	-1.55107467702671	5.16288553416945
BAHCC1	1	1	-0.602130823648413	-0.240800870058761		LMTK2	2	1	2.48392230936245	-1.09360135853075		WWOX	3	2	-0.447135263002356	4.14746915042616
BAIAP2	1	1	0.223577804052392	-1.16935409366869		LPP	2	1	2.41993851133541	-1.32045282184862		WWP2	3	2	-0.345201187646826	4.26394783199049
BAIAP2L1	1	1	0.699192649805108	-0.991816413996444		LRIG3	2	1	2.7118988699551	-0.169496787188278		XPO6	3	2	-1.66212981275364	5.24316917598463
BAIAP2L2	1	1	-0.656447821176489	0.706759917142167		LRP5	2	1	3.97260839410977	-0.45567406475328		ZC3H18	3	2	-0.317518644845923	4.2647040957234
BAMBI	1	1	-0.902270489252051	-0.924326551554428		LRP6	2	1	2.61248213716702	0.936421679856553		ZCCHC14	3	2	-0.37351792386814	4.19378982722975
BANK1	1	1	-1.93613689473911	-2.43565858661912		LRPPRC	2	1	1.95940757461743	0.364357697369828		ZDHHC1	3	2	-0.478565269029578	3.71045910060622
BARX2	1	1	0.0233810610409177	-1.08769143879198		LRRC20	2	1	3.19349152513699	-2.03440774738573		ZDHHC7	3	2	-0.376313500917395	4.21268497646071
BASP1	1	1	-2.9419450097446	-0.934664619562851		LRRC27	2	1	2.95251173444943	-2.49551357090257		ZFHX3	3	2	-0.300562434709509	4.22996054828383
BBS9	1	1	-2.09033148816868	2.34862439573027		LRRC56	2	1	3.59159213968472	-0.514059675333725		ZNF19	3	2	-0.300310783899268	4.21884714305617
BCAM	1	1	0.768797761880914	1.84078829229094		LRRFIP1	2	1	1.93529964157299	0.0672044628880162		ZNF213	3	2	-1.55447857908054	5.21124492824294
BCAN	1	1	-2.73347418836399	0.369484888913407		LRTOMT	2	1	3.95454484888271	-0.454562080500351		ZNF263	3	2	-1.59100239805027	5.16692625224806
BCAP31	1	1	1.22446968325333	1.04282914340712		LSS	2	1	2.86449164816097	0.124384986760392		ZNF277	3	2	-2.65570347837253	3.99869524181105
BCAR3	1	1	-0.142097287691077	0.170197951199784		LTBP3	2	1	3.97253925272183	-0.219669354555831		ZNF382	3	2	-0.839096479928931	3.08824561774947
BCAS1	1	1	-0.392935328996619	-0.437601459620224		LTBR	2	1	2.71326345869259	0.946878897549881		ZNF398	3	2	-2.65828316739841	3.97430478275038
BCAS4	1	1	1.12300530739979	1.06700937688567		LZTS2	2	1	3.01494509645657	-2.49054540455125		ZNF48	3	2	-1.54776375821873	5.16384040057875
BCAT1	1	1	-1.23936169675632	-2.49965490162157		MACROD1	2	1	3.95964319177822	-0.527248752711044		ZNF747	3	2	-1.56388133100315	5.16728817165114
BCKDHB	1	1	-3.43216698697849	2.62876986205794		MADD	2	1	3.54235369631008	-0.576067102549301		ZNF775	3	2	-2.64995091489597	3.90389357745863
BCL11A	1	1	-1.20339291623875	-1.43290866672777		MAML2	2	1	2.38935375877575	-1.02570952236436		ZNF83	3	2	-0.822908573663672	3.231115447881
BCL11B	1	1	-1.82696025899692	-2.74513925373338		MAP3K11	2	1	4.13599092432217	-0.418111694452987		ZNRF1	3	2	-0.384463363206824	4.21683489024855
BCL2	1	1	0.753827101671258	0.200545775296463		MAP3K13	2	1	2.23616803356365	-1.10627282917284
BCL2L11	1	1	-0.0886216693286501	-2.23548878490709		MAP4K4	2	1	1.30059605755762	0.402922021748795
BCL3	1	1	-0.103645735300025	-2.79291547596239		MARK2	2	1	3.90079576441006	-0.488080633280502
BCL6	1	1	-0.181737714326819	-2.46574987232469		MAST4	2	1	2.28430617519573	-1.28053225338243
BCORL1	1	1	-1.78082507184788	0.33697627723433		MED13L	2	1	3.52097041078762	1.22084625303961
BEGAIN	1	1	-2.00620024732395	0.931324946286454		MEN1	2	1	3.90238291689114	-0.400600803492294
BEND3	1	1	-3.50200789502903	2.70744394004561		METTL8	2	1	2.03809703060345	-0.11071945488237
BEST1	1	1	-1.38734834722324	-1.88387240230821		MFSD6	2	1	1.50114352174954	-0.141038191912399
BFSP1	1	1	-1.54592340520664	0.334139572980179		MGAT5	2	1	2.53062922426418	-1.05674518406175
BFSP2	1	1	-2.00450079969211	-2.57882131397508		MGMT	2	1	2.97188991972164	-2.48435844242357
BHLHE40	1	1	0.17896432348446	-3.01688064396165		MLF2	2	1	2.64474327036099	0.971231388451828
BICD1	1	1	-1.4652296834354	0.0104135149738926		MLLT10	2	1	2.82320625253872	-2.01703609287523
BIK	1	1	0.63787830539898	-0.93163431942247		MLXIP	2	1	3.4322632021542	1.17006130755164
BIN1	1	1	-3.9318508439426	-0.100338233111129		MON2	2	1	3.36972004839138	1.09622328222014
BIRC7	1	1	-1.24961274198337	-1.76142252743028		MREG	2	1	1.91113001772122	0.0539637678883214
BIVM	1	1	0.809995419466058	-2.23488844692491		MRPL33	2	1	1.92791242071346	0.554329740407242
BLVRA	1	1	-2.23503368428989	2.61508058250166		MRPS6	2	1	2.67785710760311	0.109606611134781
BMF	1	1	-0.863616638696631	-2.09207500278734		MSI2	2	1	2.63379246660427	-1.091629398463
BMP4	1	1	-1.12165563634678	-1.08921135723375		MTA3	2	1	1.82786924310879	0.559683668019547
BMP7	1	1	-1.84652894071384	-0.344396007654892		MXI1	2	1	2.93371838995175	-2.30740655720018
BMPER	1	1	-2.22021811536594	-1.22832573711656		MYC	2	1	2.05373991199688	-0.687260759470687
BMPR1B	1	1	-2.11133425763889	-0.78591145336412		MYOF	2	1	2.82813066908077	-2.49906171619676
BNC2	1	1	-3.45281832746311	-1.49576128780626		N4BP2	2	1	2.47421581217007	-1.23141063511156
BNIP3	1	1	0.365234441244165	1.61812336236454		NAA25	2	1	3.43282420107082	1.06778864801146
BOC	1	1	-2.40572755864902	-1.11225308239244		NAA40	2	1	3.85157687135891	-0.422121656534896
BOK	1	1	-1.29163568548008	0.354101526143326		NADSYN1	2	1	4.16023404070095	-0.543762815592514
BPI	1	1	-1.07049053243442	0.0478354567310948		NBAS	2	1	1.85611659952358	0.496837603451981
BRCA1	1	1	2.43001932569698	1.59476979129232		NCAPD2	2	1	2.53128141828732	1.23139964282729
BRD9	1	1	1.78290641971783	1.13674427807547		NCK2	2	1	1.86606273719029	-0.340456379053817
BRIP1	1	1	2.4179228014584	1.60717268713035		NCOA2	2	1	2.52243334718899	-1.17791093647264
BRSK2	1	1	-2.26276557973667	0.912377821805253		NCOR2	2	1	3.50216752954678	1.24706997215964
BSN	1	1	-2.507990770853	1.02040963113524		NDUFA10	2	1	1.9763580031033	0.0124138468525548
BTBD11	1	1	-0.0779070191745364	0.727184819581284		NDUFS8	2	1	4.05157739587978	-0.441937339899765
BTBD16	1	1	-0.767518930948218	-0.0521388179042201		NFATC2	2	1	2.49583024450497	-1.07439721882127
BZW2	1	1	-2.16851060918613	2.57024024665572		NFE2L2	2	1	1.7402600414391	0.0781806582234044
C10orf90	1	1	-2.5640758805637	-0.621281278727279		NHEJ1	2	1	1.9602372712727	-0.0313696986415248
C12orf42	1	1	-1.9261569314365	-2.56274379551195		NOP2	2	1	2.72617954679684	1.00749735772826
C12orf75	1	1	-0.383221798456153	0.779347288014664		NT5C2	2	1	2.93648487993435	-2.43155158817552
C14orf132	1	1	-3.24305813840671	-1.11321510135912		NT5DC3	2	1	3.00164384313778	1.22359211981512
C14orf180	1	1	-2.13100474408909	-1.86076940357469		NUCB2	2	1	3.20273549028591	-0.690511835215316
C16orf74	1	1	-0.380129390275916	-0.297120345232711		NUDT22	2	1	4.0800436205502	-0.414860737917648
C17orf64	1	1	-1.35253422788425	1.28201540053107		NUMA1	2	1	3.91261393495754	-0.52820504963182
C17orf82	1	1	-1.44716494611545	-1.19417275249742		OPHN1	2	1	2.48787433572964	-2.26460136234544
C19orf38	1	1	-1.20051210454746	-2.99248756229662		OSBPL5	2	1	2.96863967844204	-0.603170765040145
C1GALT1	1	1	-2.11863844922825	2.42178540170409		OSBPL8	2	1	3.23462767072872	1.10733457148291
C1orf105	1	1	-4.100031786478	-0.102577102778183		P2RX4	2	1	3.17700511881069	0.793563353421463
C1orf116	1	1	0.623603112184564	-0.852592123148666		PACS1	2	1	4.02644402452664	-0.439520490763412
C1orf127	1	1	-2.55761831334873	0.620702254178299		PACSIN3	2	1	2.9622148937817	-1.14751113712572
C1orf159	1	1	1.09236491390423	2.36776255309798		PANX1	2	1	3.63344366022305	-0.601141822931991
C1orf21	1	1	-0.521244936502417	-1.58455480396532		PARD3	2	1	2.8452168173428	-2.08515776455186
C1QTNF1	1	1	-3.39578002027317	-1.61234296619676		PARD3B	2	1	2.45284158655361	-1.17290796100877
C1QTNF6	1	1	-3.6064662270908	-1.95040143787645		PARVA	2	1	3.08128327795223	-0.617692125437484
C2	1	1	-1.16546290448948	-2.70883477985643		PASK	2	1	1.97167891927914	0.0611197823307652
C21orf58	1	1	2.38678962656216	1.61912741005637		PCGF5	2	1	3.01934546896176	-2.43250812351488
C22orf34	1	1	-3.14869826368137	0.115838634373917		PCNT	2	1	2.7775282330151	0.151874291302933
C2orf73	1	1	-1.07056515744968	2.29136424005248		PDE6D	2	1	1.9435221619244	0.0537325018665928
C3orf52	1	1	0.452223367178003	-0.17531575023912		PDHX	2	1	3.45375878282742	-0.47970331966661
C3orf67	1	1	-1.6190861993198	0.543844687344803		PDIA6	2	1	1.94558186002926	0.685192214848771
C4orf19	1	1	-0.718938522851905	-0.413504732249008		PDZD7	2	1	2.99461121031002	-2.48427356540941
C4orf36	1	1	1.48523326137022	-1.19453181087755		PECR	2	1	1.83443731733517	0.0410758131764073
C4orf50	1	1	-2.50561826757236	-0.119401229021774		PER2	2	1	1.98181582161144	-0.0480171567180019
C5	1	1	-0.82166188291355	0.652000176312699		PEX16	2	1	3.63610298105435	-0.527334344980941
C5AR1	1	1	-0.955226831949195	-2.85783208668016		PFKL	2	1	2.79102713533596	0.147304880025162
C5orf38	1	1	-1.3705407910709	-0.649922025797592		PGAP2	2	1	3.33918268152432	-0.549680126307235
C5orf47	1	1	-1.8568198018436	0.2622638815663		PHB2	2	1	2.66865236231045	1.02629338443495
C6orf132	1	1	0.60688842006878	-1.0677355653026		PHF21A	2	1	3.50219375559048	-0.541591537592636
C7orf50	1	1	-2.21747868589207	2.55902461946227		PHRF1	2	1	3.49813682504849	-0.565984142420517
C8orf34	1	1	-1.10797374776646	2.27052609861113		PITPNM1	2	1	4.04604775377468	-0.44111861049913
C9orf139	1	1	-1.51520174077793	-2.9373895055034		PITPNM2	2	1	3.4968589014645	1.2674963945172
C9orf50	1	1	-1.18528454831882	-0.193441045878158		PKNOX1	2	1	2.70452434488491	0.144827353360428
CA10	1	1	-1.7302910619144	-0.304690015909896		PKP4	2	1	1.90193609067158	0.0048601502201695
CA11	1	1	-1.62835305265232	1.43732653796889		PLCB3	2	1	3.98333961435513	-0.447035682795272
CA12	1	1	-0.778312855279883	-0.00619984924577288		PLEKHA5	2	1	2.70026297041134	0.896118389966263
CA13	1	1	0.167059368574182	-0.771801365015731		PLEKHB2	2	1	1.75806943246082	-0.329451573488937
CA4	1	1	-2.43594735196873	-2.1916312104442		PLEKHM3	2	1	1.89950556226925	0.0591965788624425
CA5B	1	1	1.23477328487591	0.990430104138627		PNKD	2	1	1.89731410809712	-0.087267768976913
CABLES1	1	1	-1.15356677106663	-1.49995769321703		POC1B	2	1	3.27171379991726	1.1318842643521
CACHD1	1	1	-1.77170246175571	-0.816541326639877		POLD3	2	1	3.9255607790585	-0.31595672428392
CACNA1A	1	1	-2.61285679868503	0.870354818703904		POLR1A	2	1	2.07127130695538	-0.0785157805659633
CACNA1B	1	1	-2.33371990255161	0.8408811563275		POLR2L	2	1	3.38687056966976	-0.606931341288314
CACNA1C	1	1	-3.66430562070652	-1.09442914783739		PPARGC1B	2	1	2.37577772804455	-1.30738033115648
CACNA1D	1	1	-0.0758032136325442	0.285459386708512		PPFIA1	2	1	4.18069297739224	-0.60047878086351
CACNA1E	1	1	-0.809973173654517	0.741654323937668		PPHLN1	2	1	3.36360294290737	1.09101020038344
CACNA1G	1	1	-2.29013269475742	-0.44810046016954		PPP1CA	2	1	4.09372693964199	-0.438682211039291
CACNA1H	1	1	-3.58333151868626	-1.12563432514452		PPP1R14B	2	1	3.9961755938168	-0.394414437411056
CACNA1I	1	1	-1.93444269231602	0.415609466435685		PPP1R7	2	1	1.94204676815228	0.0582778328678746
CACNA1S	1	1	-4.03995221189304	-0.162188423273788		PPP2R1B	2	1	3.34353453584866	-0.42936266720079
CACNA2D2	1	1	-1.43162935308262	-0.921929252741561		PPP2R2D	2	1	2.96750826307491	-2.47642101108812
CACNA2D3	1	1	-2.12500279477878	-0.501764190790878		PPTC7	2	1	2.59422642656521	-1.06824983417772
CACNA2D4	1	1	-1.03172581723972	-2.68541253864549		PRDM10	2	1	3.53879219957546	-0.48631109058641
CACNB1	1	1	-4.0409464173679	-0.092901838419662		PRDM11	2	1	3.1269094414349	-0.801393879053817
CACNB4	1	1	-1.82368486455723	-0.431070459482894		PRDM15	2	1	2.75579530664639	0.158646451833024
CACNG2	1	1	-2.90845053724094	0.528580891492142		PRDM4	2	1	3.46217209764675	1.14471449196555
CACNG4	1	1	-1.40634029439731	-0.814434898493515		PRH1	2	1	2.6699740357037	1.01391636073805
CADM1	1	1	-1.3887817197208	-1.39425934612535		PRPF40B	2	1	3.38953453966335	1.12175990879752
CADM2	1	1	-2.80378048948093	-0.0730286961772304		PSMA1	2	1	3.44891054102139	-0.511543167231308
CADPS	1	1	-2.3420242600803	0.832825528981461		PTCH1	2	1	2.29609817930416	-1.09058822452806
CADPS2	1	1	-0.529679828203162	-1.1925221806743		PTDSS2	2	1	3.43703157373623	-0.616262329218612
CALCB	1	1	-2.36886327794834	0.223566161992325		PTMA	2	1	1.99803811975674	0.0315416926167149
CALD1	1	1	-3.73893206647678	-1.04010356724046		PTPN14	2	1	2.41272575327114	-1.33947933971666
CALN1	1	1	-2.65981715253635	-0.234254253504501		PTPN4	2	1	2.25383985706524	-1.26724137127183
CAMK1D	1	1	-1.67182367376133	-0.125741136667953		PTTG1IP	2	1	2.72158474394039	0.134358512761368
CAMK2A	1	1	-3.88759701780125	-0.260275495646225		PUM2	2	1	1.81920120784001	0.519011127354874
CAMK2B	1	1	-3.85484498075291	0.0759863728306431		PUS1	2	1	3.37204915949062	1.12198464811064
CAMK2D	1	1	1.54807927378372	-1.26022137462877		PWWP2B	2	1	2.95780879923062	-2.45145810901903
CAMK4	1	1	-1.88997405103489	-2.78206075489305		PXN	2	1	3.41045982309536	1.18773512780882
CAMTA1	1	1	1.23713942536072	2.13946198165633		R3HDM2	2	1	3.38761205145077	1.16172175348021
CAND2	1	1	-1.20742481282993	1.25601102650382		RAB30	2	1	2.63518471189694	-1.10830224811815
CAP2	1	1	-3.71828740171238	-0.544765842554794		RAB35	2	1	3.42908555933193	1.11905248701788
CAPG	1	1	-0.576340728319129	-2.0654949074962		RABGAP1L	2	1	2.29711360403256	-1.49710453808092
CAPN13	1	1	-0.187104874170264	-0.750582588312851		RAD52	2	1	2.64679521986202	1.03934256971098
CAPN5	1	1	-0.380623035943946	-0.205554378626571		RAD54L2	2	1	2.46940833994106	-1.1833726292827
CAPN8	1	1	0.124621338331262	-0.573280466196762		RAD9A	2	1	4.08848792978481	-0.497240436671005
CAPN9	1	1	-0.348192267930945	-0.505629909632431		RALB	2	1	1.78114742704586	0.474823700787796
CAPZA1	1	1	1.45388194464997	1.93287541210867		RALGAPA2	2	1	2.51268143125729	-1.09278453647874
CAPZB	1	1	1.22687704035	2.22418718278624		RASSF3	2	1	2.5618607468243	-0.973531854746566
CARD10	1	1	-0.806574516809424	-0.581349027750717		RASSF8	2	1	2.54556507536129	0.884646283986344
CARD11	1	1	-0.995350294626197	-2.52474845707201		RBM19	2	1	3.4104593462582	1.1889478141091
CARD14	1	1	-0.171163135087927	-0.97544421016954		RBMS1	2	1	2.18198526569561	0.166298972966446
CARNS1	1	1	-1.51923792890354	0.275859104993119		RCAN3	2	1	2.18912620016293	-0.845045459864364
CASK	1	1	1.08333656855778	1.01620327174879		RCN1	2	1	3.36566681333737	-0.522729051707016
CASP9	1	1	1.17598337598995	2.31930701673247		RCOR2	2	1	3.56923086115078	-0.198352110979782
CASQ2	1	1	-3.81990807584568	-0.500889433024154		RDX	2	1	3.01366371580319	-0.29506136238359
CASS4	1	1	-1.18956201604648	-2.92657817661546		REEP3	2	1	2.80884856649593	-1.69958318531297
CASZ1	1	1	1.0600748128529	2.16644899785735		REL	2	1	2.42250985571102	-1.30754197895311
CAV2	1	1	-0.0345449977283083	-1.79407824337266		RELA	2	1	3.98698050447659	-0.44078410923265
CAV3	1	1	-4.07425683072849	-0.126776469347702		REST	2	1	2.5363412565823	-1.14124621212266
CBFA2T3	1	1	-1.97187345556064	-2.64073623478197		RGS10	2	1	2.74092895456509	-2.34605087101244
CBR4	1	1	1.67318529554562	-1.23820627987169		RHBDD1	2	1	2.02624178596691	-0.0184527760722499
CBX4	1	1	0.1577612824078	-2.75075210392259		RHOQ	2	1	1.64779373177246	0.494742142560257
CCDC102B	1	1	-2.88776581815525	-2.59144176304124		RIC8B	2	1	3.41434366174893	1.09405796468474
CCDC120	1	1	0.90943444439129	0.608720945718064		RILPL1	2	1	3.4829211897488	1.20173828542448
CCDC13	1	1	-1.13794177106663	2.22787820041396		RNASEH2C	2	1	4.15979821153835	-0.369391096232162
CCDC146	1	1	-1.24369733861729	2.37844299018599		RNF10	2	1	3.43489701219753	1.19254298746802
CCDC148	1	1	-0.979869061029395	2.31510882318236		RNFT2	2	1	3.28350884386257	1.31001277506567
CCDC149	1	1	1.67100993462757	-1.4599725133159		RNPEPL1	2	1	1.95692289539532	0.0398150557301182
CCDC151	1	1	-1.14691918424412	2.20845894754149		RRAS2	2	1	3.29203791090206	-0.4887286549785
CCDC155	1	1	-1.4488608174686	1.07246516883589		RREB1	2	1	2.54451603361324	-1.20462216198228
CCDC3	1	1	-2.9504374795322	-2.19889296352647		RRP12	2	1	2.92970890470699	-2.52060808002733
CCDC33	1	1	-1.1485997968082	2.22788630664565		RSF1	2	1	3.73718125292019	-0.525760067103134
CCDC40	1	1	-0.954819613016089	2.41315983474471		RSU1	2	1	2.78720731207089	-1.90868533909105
CCDC80	1	1	-3.41407483152195	-1.50777686893724		RTN3	2	1	3.91508538194851	-0.438227785227523
CCDC88C	1	1	-1.58599870733066	-2.33248676121019		RTN4	2	1	1.66693041392521	0.444243060948624
CCM2	1	1	-2.2246655755405	2.54381595790602		SAMD8	2	1	2.55273920961575	-1.43200005352281
CCNF	1	1	2.35971373983578	1.68400041997649		SBF2	2	1	3.47423917719082	-0.570163143275009
CCNG2	1	1	1.60687876411633	-1.26846517383836		SCARB1	2	1	3.13883001276211	0.458974706532731
CCNJL	1	1	-0.157638602769812	-0.677798164484726		SCD	2	1	3.1718050903912	0.0434892052433629
CCR10	1	1	-1.28856723836704	1.07848645985342		SCYL1	2	1	3.99307114549832	-0.443945301172958
CCR3	1	1	-0.949658327615698	-2.0640677338817		SERGEF	2	1	3.45460683771328	-0.580551279185043
CCR7	1	1	-1.88437192968174	-2.73380292713426		SERINC5	2	1	2.52227229543881	-1.12672556698106
CD109	1	1	-0.10448294214054	-1.64147962391161		SERTAD2	2	1	1.77823571034626	0.525366889836564
CD247	1	1	-1.77275341085239	-2.95272172748827		SETD1B	2	1	3.46959335275845	1.17591886460997
CD36	1	1	-2.44322126439854	-2.2201796895244		SF1	2	1	3.81390220590786	-0.422790659067855
CD44	1	1	-0.770404749429663	-1.96617926418565		SF3B2	2	1	3.93774158426479	-0.456665647623764
CD58	1	1	1.46102539368824	1.9231600040219		SFXN3	2	1	2.93243152567104	-2.48433507740282
CD6	1	1	-1.75368731550022	-2.92370237171434		SGMS1	2	1	2.96978802152828	-2.37526406109117
CD96	1	1	-1.73416369489475	-3.00832618534349		SGPL1	2	1	2.94017476507382	-2.48076833545946
CDC14A	1	1	1.29833702661947	1.72983524441935		SH3BP4	2	1	1.95493132539944	-0.0990454083659511
CDC25B	1	1	2.23250538774685	1.4793161848209		SHOC2	2	1	2.98744935461239	-2.43717588245653
CDC42BPG	1	1	0.673686987840692	-1.0088383084514		SIGIRR	2	1	3.58837468095974	-0.474059951899276
CDC42EP3	1	1	-3.62951939634128	-1.07336152851366		SIK3	2	1	3.64936429926113	-0.466391695139633
CDC42EP5	1	1	-0.0829419427280031	-0.181594026682601		SIPA1	2	1	4.0526142782803	-0.306453121302352
CDCP1	1	1	0.407614297353784	-1.0505749112346		SIRT1	2	1	2.97291202017025	-2.40650905430101
CDH1	1	1	0.800168103658716	-0.855018509028183		SLC11A2	2	1	3.35475141473965	0.953922795655503
CDH11	1	1	-3.52612870267673	-1.71412075817369		SLC19A1	2	1	2.9081217712994	0.0857559317371983
CDH12	1	1	-3.18052285245701	-0.0782232409694057		SLC25A12	2	1	1.94621551700787	-0.0267298346736293
CDH13	1	1	-2.94161789945408	-2.29190100490831		SLC35F2	2	1	1.72601313062863	-0.656278503535018
CDH15	1	1	-4.07622521451755	-0.0915017253138881		SMARCC2	2	1	3.41434866853909	1.10546957195021
CDH17	1	1	-0.750517778909644	0.731043147446885		SMUG1	2	1	3.32034689851956	1.0547101372502
CDH18	1	1	-3.13547270826145	-0.0695423012950283		SNX25	2	1	1.73885182210163	-0.421634448168502
CDH2	1	1	-2.40965931943699	-1.13146008312486		SOCS7	2	1	2.42055065103726	-1.08600868046068
CDH22	1	1	-2.73060982755466	0.32588897884108		SOS1	2	1	1.79637611576275	0.492198931576981
CDH23	1	1	-1.62512820295139	-1.42164982616685		SP1	2	1	3.41407281824307	1.16521905601241
CDH26	1	1	-0.96690958074375	-0.71646941959642		SP3	2	1	1.81231606670574	0.175964581372513
CDH3	1	1	-0.493846827066382	-0.91675747692369		SPATA13	2	1	2.4880767531033	-1.09964979946397
CDH4	1	1	-2.34914558461948	0.098047959210648		SPATS2	2	1	3.35124713846401	1.04272984206892
CDH5	1	1	-2.76535027555271	-2.61748327076219		SPATS2L	2	1	1.54703616269783	0.0268256539127965
CDHR2	1	1	-0.657966785943946	0.747539328934922		SPOPL	2	1	1.85937795706944	0.219298231007828
CDHR3	1	1	-1.20757334760471	2.2095050090573		SPPL3	2	1	3.44510275789456	1.14262564718939
CDHR5	1	1	-0.622775488412818	0.733703004719986		SPSB2	2	1	2.82795865007595	1.05442302167632
CDK14	1	1	-2.30799596837803	-0.945310247538314		SREBF1	2	1	3.27313501306728	0.0197956436894078
CDK18	1	1	-1.42449968389316	0.415871488454117		SSH1	2	1	3.45116621919827	1.15734865010001
CDK19	1	1	-3.51503317884251	2.69015632808424		SSH3	2	1	4.09556300111965	-0.490510595438705
CDK6	1	1	-1.19834106496616	-1.10899246990465		SSRP1	2	1	3.91758400865749	-0.363039386866317
CDKL1	1	1	-0.34269767335697	0.518971788289322		STARD10	2	1	3.91202289529995	-0.52029718220018
CDKN1A	1	1	0.239965743505517	-2.87688363849901		STAT6	2	1	3.23628766008572	0.967997121217026
CDKN2C	1	1	2.31934732862667	1.68126838892914		STIM1	2	1	3.36912328668789	-0.577474725840316
CDON	1	1	-2.24215834668918	0.0509073609135289		STK16	2	1	1.98210085102276	0.00127588451124616
CDT1	1	1	2.39783377119259	1.62205450475432		STK32C	2	1	2.95603889890865	-2.46919645130418
CEACAM1	1	1	0.284797734701196	-0.747052085993515		STOX2	2	1	2.39211565920071	-1.31885875522874
CEACAM6	1	1	0.0137632555599607	-0.557675254938827		STX2	2	1	3.34993094869808	1.08549912512518
CEBPA	1	1	-1.10810487798496	-2.37569583713792		SUFU	2	1	2.91262168356136	-2.51917756855272
CEBPB	1	1	0.437928742849389	-3.25528730213426		SWAP70	2	1	2.98160726495937	-0.525971544382797
CECR2	1	1	-2.28114717534824	0.663669573666825		TACC2	2	1	2.91719669767574	-2.50851215183519
CELF2	1	1	-1.73654835752293	-2.70741571247362		TAF1B	2	1	1.87371996709065	0.552640663983597
CELF4	1	1	-2.65967648557468	0.632982301118149		TAF4B	2	1	1.93512470194058	-0.665530098078476
CELSR1	1	1	-0.299834065950354	-1.31374491512559		TANK	2	1	1.84877497621731	0.0435272330067296
CELSR2	1	1	-0.310077124155005	-1.21633471309923		TAOK3	2	1	3.4444976515408	1.21275048196532
CENPA	1	1	2.42584747739987	1.65033085137822		TARBP2	2	1	3.37596220442013	1.09376801789023
CEP72	1	1	2.06971324154095	1.25740088761069		TBC1D16	2	1	2.36576766439633	-0.902140749094711
CERCAM	1	1	-3.57256739667698	-1.76101030170702		TCF7L2	2	1	2.95608121820645	-2.3858245736339
CERKL	1	1	-1.19891231588169	2.21226375043608		TCHP	2	1	3.48605186411099	1.1844816678784
CGN	1	1	0.780225223981897	-0.636976612208114		TCP11L1	2	1	3.3201934761639	-0.72114528476976
CGNL1	1	1	-1.02452295354648	-1.22077072918199		TEAD1	2	1	2.94394213625149	-0.517047060129867
CHD5	1	1	-2.3548793130283	0.865557360055222		TEAD4	2	1	2.68121463724331	0.932186233403458
CHI3L2	1	1	-0.934734516656836	-1.98573769390367		TET1	2	1	2.76605851122097	-1.9251312142589
CHIT1	1	1	-0.971385889566382	-2.61717952549242		TET3	2	1	1.76135743328289	0.515832173230423
CHN1	1	1	-3.13222020200535	-1.52410472690843		TGFBRAP1	2	1	2.57885486551479	-1.01812781154893
CHN2	1	1	-1.00466650060459	-1.82785738765977		THADA	2	1	1.86476928659634	0.518487679364457
CHRM1	1	1	-1.07617490819736	-0.34998501598619		THAP4	2	1	1.99277091690258	0.00902293861128278
CHRM3	1	1	-3.05802290967747	0.00560473144270368		TLK1	2	1	1.87385863729672	0.223484384419693
CHRNA4	1	1	-1.19589870504185	0.198952543141617		TM7SF2	2	1	3.34399122663693	-0.426700485346542
CHRNA7	1	1	-0.966053896463355	-0.156124961970077		TMBIM1	2	1	1.95229995914654	-0.0441514378764492
CHRNB4	1	1	-2.60120051435276	0.80809991300322		TMEM109	2	1	3.96668655344204	-0.353094113466964
CHST11	1	1	-1.44410436681553	-2.12609781086229		TMEM120B	2	1	3.34890598722653	1.20821433007933
CHST12	1	1	-2.14968841604038	2.51102404535033		TMEM123	2	1	3.64553267427639	-0.446312559244857
CHST15	1	1	-1.25881236127659	-1.82129801571153		TMEM131	2	1	1.84717029997067	0.344863759877457
CHST3	1	1	-1.28263705304905	-0.594344032404647		TMEM132A	2	1	3.84541542001919	-0.551755321619735
CHST8	1	1	-2.28039424947544	0.823656784894242		TMEM50B	2	1	2.73849362798885	0.124672400357499
CIB4	1	1	-2.19284074834629	0.160884725453629		TMEM80	2	1	3.46832830377773	-0.542403352854476
CIITA	1	1	-1.27611320546909	-3.01592363178514		TMTC2	2	1	3.1423896021481	1.20258762181021
CIT	1	1	2.66681427427487	1.46186141163327		TNFRSF1A	2	1	2.68025512167172	0.944058584573044
CLCF1	1	1	0.303986138784448	-3.15856374561571		TNKS1BP1	2	1	3.66736323305325	-0.659888637659774
CLCN4	1	1	-3.4956263833408	-0.154605639574752		TPCN1	2	1	3.32082910009579	1.1586418920777
CLCNKA	1	1	-1.32719295553013	0.0865969532749791		TPCN2	2	1	4.17676979967312	-0.633896959421859
CLDN10	1	1	-2.55766265920444	0.541105973126664		TRAF3IP1	2	1	1.97595972486691	0.0161007517597813
CLDN11	1	1	-1.73143666318699	0.311446177365555		TRAPPC10	2	1	2.78484231897549	0.146135794522538
CLDN14	1	1	-0.973093681848487	-1.72934855282091		TRIM44	2	1	3.10415203043179	-0.808661354181991
CLDN4	1	1	0.772911495649377	-0.915408027765976		TRIM8	2	1	2.97137863107876	-2.46947826206468
CLDN6	1	1	-1.42517703107639	0.939614104630722		TRIP12	2	1	1.93097401329235	0.0700836056492466
CLDN9	1	1	0.459517664396325	-0.447102916834579		TSPAN14	2	1	2.96707899042324	-2.49709142505907
CLIC4	1	1	-3.68699019483372	-1.01840103924058		TSPAN31	2	1	3.37059838243679	1.08520387351729
CLIC5	1	1	-1.11856215528293	-0.701080930826889		TTBK2	2	1	2.45270080038265	-1.30010594188951
CLIP2	1	1	-1.84148972562595	-1.08238447963975		TTC12	2	1	3.02608711191372	-0.521284473536239
CLMN	1	1	-0.531013184106787	-1.04759348690294		TTC21B	2	1	1.89232373901562	0.179480659367814
CLNK	1	1	-1.47743766835972	-0.349873078463302		TTC7A	2	1	1.51314564713196	0.278306710126175
CLSPN	1	1	2.3979471988316	1.61949287593581		TTL	2	1	1.98070246645168	-0.0769747620799404
CLSTN1	1	1	1.14690185257153	2.30092536151625		TUBA1C	2	1	2.76869446703152	1.39371784270026
CLSTN2	1	1	-2.39087050489231	-0.903849256632553		TUBGCP2	2	1	2.94409269758419	-2.46561540424608
CLSTN3	1	1	-2.3718675904636	-0.20587314426683		TXNDC16	2	1	2.35584009357647	0.399595844151749
CLVS1	1	1	1.66276854940609	-1.66290177166246		UBC	2	1	3.56795770593838	1.12964783847548
CLYBL	1	1	0.795228964769403	-2.14162148296617		UBE2G2	2	1	2.75576800771908	0.134788858296647
CMBL	1	1	-0.26124244264408	0.470325219037308		UBR3	2	1	1.8088951177235	0.4612225168965
CMTM3	1	1	-3.64617293409153	-1.87486852466844		UBTD1	2	1	2.96624810167507	-2.4563743001201
CMTM7	1	1	-0.768740349328955	-0.685392988322006		UBXN7	2	1	2.40347505279736	-1.27466214954637
CMTM8	1	1	0.613468892061273	-0.364735735056625		UEVLD	2	1	2.97911483713345	-0.829955232737289
CNBD1	1	1	-3.22345154813572	0.0199057930729527		UGP2	2	1	1.72457946010784	0.518031107785477
CNDP1	1	1	-1.42093723348423	0.415304409863724		ULK1	2	1	3.47289235063748	1.16365151345946
CNGB1	1	1	-0.926876478708228	-0.14903343975328		UNC93B1	2	1	4.04420978494839	-0.398107183573471
CNIH3	1	1	-2.14986746839329	-1.36492670833849		USP12	2	1	2.40210986801342	-1.16609920322679
CNKSR3	1	1	-3.53923361829563	2.68798981845595		USP34	2	1	1.78187713690952	0.534615265729203
CNN2	1	1	-1.21327179006382	1.32321332633711		USP39	2	1	1.86526582308964	0.49678205192305
CNNM1	1	1	-2.09361141256138	0.669980871083512		USP40	2	1	2.04212362238125	-0.045073640940414
CNNM4	1	1	1.05736739107327	-0.649750841257797		USP54	2	1	2.80268079706387	-2.34269131481432
CNPY1	1	1	-2.53238504461094	0.469455706479325		USP6NL	2	1	2.83102137514309	-2.04574884235643
CNTD2	1	1	-1.5770997338657	1.14382116735197		UVRAG	2	1	3.8716045088406	-0.516707313654647
CNTFR	1	1	-1.99299543432041	0.486761199834122		UXS1	2	1	1.8506266541119	-0.198711646197067
CNTLN	1	1	-2.49445455602451	1.13584803283431		VDAC2	2	1	3.02212840982632	-2.37830532848619
CNTN1	1	1	-2.72055142453953	-0.159698022005783		VEGFB	2	1	3.95701391168789	-0.356128585932479
CNTN4	1	1	-2.70192378095432	-1.30962957203172		VPS37B	2	1	3.36371297308163	1.15970270574309
CNTN5	1	1	-2.81150048307224	-0.0151220685222011		VPS37C	2	1	3.91425592371182	-0.391791713831649
CNTNAP2	1	1	-1.7831053071384	-0.410535944102035		VSIG10	2	1	3.2977781958218	1.01291541993834
CNTNAP5	1	1	-3.06997960141941	0.100933658482804		VTI1A	2	1	2.99991197057919	-2.36352289974474
COBL	1	1	0.687280721151391	-0.426847589609848		WDFY1	2	1	1.91876805492596	-0.00104488193772845
COL11A2	1	1	-2.11154048970981	-0.063296092150436		WDR12	2	1	1.95394820638851	-0.0353546267726284
COL12A1	1	1	-3.59983294538303	-1.76236881077074		WDR37	2	1	2.80236679979519	-2.00718892872118
COL13A1	1	1	-2.43690674833103	-1.65152276813768		WWTR1	2	1	2.39653051563458	-1.28670729458116
COL14A1	1	1	-3.06123869947239	-1.48397697269701		XPNPEP1	2	1	2.98458094068722	-2.44124664127611
COL15A1	1	1	-3.18635790876194	-2.16578902065538		XRCC5	2	1	1.91142321296887	0.0291089886448521
COL16A1	1	1	-3.45408337644382	-1.68840779125475		YAP1	2	1	3.12367088266567	-0.980146062968002
COL18A1	1	1	-3.12910073331638	-2.35977853595995		ZBED5	2	1	3.4495127863522	-0.54907645046495
COL19A1	1	1	-1.83704679540439	-1.9405006295421		ZBTB20	2	1	2.43163175054745	-1.29618324100755
COL20A1	1	1	-2.86678450635715	0.271668898465409		ZC3H10	2	1	3.38008720346645	1.10017003357626
COL21A1	1	1	-3.46100276044651	-0.880645168421493		ZMIZ1	2	1	2.97137314745144	-2.48034061252855
COL22A1	1	1	-1.24066894582554	-0.303542388079391		ZMYND11	2	1	2.80214089819149	-2.01108850300096
COL23A1	1	1	-1.71685474447056	0.029735552670731		ZNF438	2	1	2.73525328108029	-1.98212732136034
COL24A1	1	1	-3.72392170957371	-1.72777832805894		ZNF462	2	1	2.09808737703518	-1.19464243709825
COL25A1	1	1	-2.27327793172642	-1.93025959789537		ZNF638	2	1	1.78617367812351	0.543857800366654
COL27A1	1	1	-0.693228655374488	1.26759048044898		ZNF664	2	1	3.4007656044598	1.09312720835425
COL28A1	1	1	-3.20442097715183	0.139679300191178		ZNF689	2	1	2.68210310407833	-0.930015695688949
COL2A1	1	1	-1.46061294606968	-0.280639184115158		ZNF704	2	1	2.49943823286251	-1.20740855991624
COL4A1	1	1	-3.11848109296604	-2.35802568256639		ZNF710	2	1	2.56308812566952	-1.19956482708238
COL4A2	1	1	-3.14882987073704	-2.32008518039964		ZNF827	2	1	2.36400676437573	-1.20852698147081
COL4A3	1	1	-2.07378047040745	-1.88833559810899		ZRANB3	2	1	2.36136764951901	-0.45124234020494
COL4A6	1	1	-0.506612830675086	-0.905548942682968
COL5A1	1	1	-3.57932751706882	-1.80834258854173
COL9A2	1	1	-1.45999496511265	-0.332859171030746
COL9A3	1	1	-1.91123860410496	0.121440159680619
COLEC12	1	1	-1.79766052297397	-2.01505197345995
COPZ2	1	1	-3.63797658017918	-1.48759163677476
CORO2A	1	1	0.374578065359155	-1.43277586757921
CORO2B	1	1	-3.00076573423191	-0.447829378245101
COX19	1	1	-2.22015255025669	2.59797738731123
CPA5	1	1	-1.92729752591892	-2.6954518681743
CPA6	1	1	-2.13387458852573	-0.576153171656356
CPAMD8	1	1	-0.840335302865943	-0.642213953135238
CPE	1	1	-2.88748448423191	-0.369756353495346
CPEB1	1	1	-2.66814559034153	0.615707325341477
CPEB2	1	1	1.65718608268456	-1.50861800968431
CPLX1	1	1	-2.07823508313938	0.762330579163804
CPLX2	1	1	-2.69793599180027	0.656785237195267
CPNE2	1	1	-1.39961808255955	-0.799817216990219
CPNE4	1	1	-1.85060399106785	-0.108371151087509
CPNE5	1	1	-2.0330700211887	-2.63096584141038
CPNE9	1	1	-2.66180890134617	0.108706461789383
CPPED1	1	1	-2.101660900629	-0.247754109499679
CPS1	1	1	-1.10578935674473	0.643616723420395
CPVL	1	1	-0.94946425489231	-2.55555213749193
CPXM2	1	1	-3.27646916440769	-1.41150010883592
CPZ	1	1	-3.42213481000706	-1.57223380863451
CRB1	1	1	-2.88876288465305	0.315217601659073
CRB2	1	1	-1.54423182538792	-1.22011793911241
CREB3L1	1	1	-3.40511553815647	-1.84235514461778
CREB5	1	1	-1.78407185605808	-0.947400940058456
CRHR2	1	1	-3.29696839383884	-0.0378816252925258
CRIM1	1	1	-0.700383120096167	-0.967501533625351
CRIP1	1	1	0.367651051961938	-1.29846347629808
CRIP2	1	1	0.393435067617456	-1.36311639606737
CRISPLD2	1	1	-3.53219693235203	-1.7169841653087
CRLF1	1	1	-2.53465097478672	-1.36645258724474
CRMP1	1	1	-1.84459894231602	0.639800416829361
CROCC	1	1	1.05052740045742	2.3840826028607
CRTAC1	1	1	-1.73027580312534	-1.41687477886461
CRYL1	1	1	0.776243097269098	-2.18581641971849
CSF1R	1	1	-1.17474310926243	-2.83689512073778
CSGALNACT1	1	1	-1.85147064260288	-0.493289602396713
CSMD2	1	1	-3.52431719831272	-1.83869065105699
CSMD3	1	1	-3.04070418409153	-0.213204277155624
CSPG4	1	1	-2.98089163831516	-2.20926536381029
CSRNP1	1	1	0.123668021642724	-3.03608812153123
CSRP1	1	1	-3.66286032728001	-0.97325743496202
CSTA	1	1	-0.56394761136814	-0.78250945865892
CTBP1	1	1	1.65814150043682	-1.6147850877025
CTCFL	1	1	-1.4686681561832	1.22036044538237
CTDP1	1	1	0.858727282964746	0.324167835118546
CTF1	1	1	-1.11836379102512	1.28373389184691
CTNNA2	1	1	-2.60284703306003	0.163093196751847
CTNNA3	1	1	-3.82506316236301	-0.403657448885665
CTNNBIP1	1	1	0.913825011932413	1.99309556424834
CTNND2	1	1	-2.60397284559055	0.466207610966935
CTPS2	1	1	1.12680394121365	1.07823483884551
CTSD	1	1	-0.829725437677344	-2.66727556049608
CTSH	1	1	-1.12490099004551	-1.74038351833604
CTSZ	1	1	-1.08134286931797	-2.8335830098369
CTTNBP2	1	1	-2.23384564451023	-0.578623188135849
CUBN	1	1	-0.922250681436499	0.375631796719803
CUL4A	1	1	0.79173881479458	-2.22105110943101
CUX2	1	1	-1.69732921651646	-0.264603031275497
CX3CL1	1	1	-0.396104627168616	-1.07944525539659
CXXC5	1	1	1.00756455131725	-0.339658749697433
CYB5A	1	1	0.132754392110864	0.16965757549025
CYFIP2	1	1	-1.50034874013706	-1.64199103176378
CYGB	1	1	-2.82166045240208	-2.23833407223009
CYP19A1	1	1	-1.2023655705814	-2.26512254535936
CYP1B1	1	1	-2.9171180062656	-1.36215485393785
CYP24A1	1	1	-0.575373344934424	-1.37309325992845
CYP26B1	1	1	-2.17745416692539	-1.41464437305711
CYP46A1	1	1	-2.13001268438145	1.11142228782393
CYP4B1	1	1	-1.15443103841587	-0.987004650233017
CYP7B1	1	1	-1.73919790319248	0.716168629529252
CYS1	1	1	-2.59951680234714	-0.973576200602279
CYTH3	1	1	-2.24867861799045	2.48288290441252
CYTH4	1	1	-1.19522541097446	-2.88517869770311
DAAM2	1	1	-3.47232096723362	-1.20068706333421
DAB1	1	1	-2.82090323499485	0.00629340350843854
DACH1	1	1	-2.0523251824741	-0.849767101404892
DACT1	1	1	-3.61805766156956	-1.79861105739854
DAGLB	1	1	-2.23069637349888	2.60167680919386
DAP	1	1	1.71208558150486	1.12481023609854
DAPK1	1	1	-0.28881435922428	0.503859865071549
DAPK2	1	1	-3.67272990278049	1.05441521346785
DAPL1	1	1	-1.17692440084263	-0.358115447161422
DBNL	1	1	-2.17596667341038	2.54627470910765
DCC	1	1	-2.28472393087192	-0.204609168169723
DCDC1	1	1	-1.04988854459568	2.30742542684294
DCLK1	1	1	-2.5834245019321	-0.0674830800273281
DCLK2	1	1	-3.23267357877537	-1.59224332630418
DCUN1D2	1	1	0.82081813284115	-2.2087472802379
DDAH1	1	1	0.772696859323541	-0.322846663592086
DDC	1	1	-0.665251427209815	0.71035878598906
DDR2	1	1	-3.50501196912571	-1.38982929050706
DEC1	1	1	-1.12331312230869	-0.253534806368576
DEGS2	1	1	0.325783438169519	-1.09806789219163
DENND2A	1	1	-2.21159880689426	-0.972099674341903
DENND2D	1	1	-0.855283432519873	-2.16210950672411
DENND5B	1	1	1.60490053065972	1.09079115331389
DGAT2	1	1	-1.71515958837314	-1.91094602405809
DGKB	1	1	-3.10967152646824	0.130392896535172
DGKG	1	1	-0.236339383638343	0.918159829976334
DGKI	1	1	-2.29638712934299	-0.0609604245402675
DGKQ	1	1	1.63987768360333	-1.58781684696458
DHRS3	1	1	-1.11638825467869	-0.479912412760482
DHRSX	1	1	1.05568731495098	1.12679882586218
DIAPH2	1	1	0.441665298425714	0.6947749727986
DIO2	1	1	-3.40357869199558	-1.55476559459947
DISC1	1	1	-2.01955454877659	-1.3539036637523
DIXDC1	1	1	-3.6832951836948	-0.91768635570787
DKK3	1	1	-2.95475619367405	-1.48474634945177
DLC1	1	1	-2.88571637204929	-1.62144316494249
DLEC1	1	1	-1.15572851232334	2.17678193986632
DLG2	1	1	-2.6747559838657	-1.26296676456712
DLG3	1	1	0.912846631490747	-0.590118063090072
DLG4	1	1	-1.41316931775852	1.61873711884238
DLGAP1	1	1	-2.44365423253818	-0.735097301600204
DLGAP2	1	1	-2.27446716359897	-0.189801347849594
DLGAP3	1	1	-2.4828020863895	0.888285803200974
DLL1	1	1	-2.67362015775486	-1.88788784801744
DLL4	1	1	-2.85813086561008	-2.62866128742479
DLX1	1	1	-1.86240404180332	-0.339425218699203
DLX2	1	1	-1.56117194227024	-0.410362494585739
DLX3	1	1	-0.877414875543555	-0.560194147227035
DLX4	1	1	-1.25768750242039	-0.372361791727768
DMD	1	1	-3.28765481046482	-0.792674673197494
DMGDH	1	1	-0.757377319848975	0.280786859395279
DMPK	1	1	-3.78122513822361	-0.686073196528183
DNAH11	1	1	-1.05364196828647	2.20157651841856
DNAH14	1	1	-1.52130191854282	0.623770582082047
DNAH17	1	1	-1.04707806638523	-0.0175824290492397
DNAH2	1	1	-1.27821939519688	1.90830259263731
DNAH3	1	1	-1.15769260457798	2.21390484512068
DNAH5	1	1	-0.930581503427466	2.3500032895825
DNAH8	1	1	-1.73188965848728	-0.305138481257186
DNAH9	1	1	-1.15427749685093	2.23150138795592
DNAI1	1	1	-1.10479515126987	2.30028622091032
DNAJB13	1	1	-1.11349528363987	2.17737113177992
DNAJB14	1	1	1.74718589254574	-1.29663885891222
DNAJC15	1	1	0.843285150014917	-2.32022131740831
DNAJC16	1	1	1.26242222555832	2.36911420762755
DNAJC5B	1	1	-1.00557392171665	-2.67171586811327
DNAJC6	1	1	-2.31102245382114	0.589573072793259
DNASE1	1	1	-1.50230401090427	-0.181194437144027
DNER	1	1	-2.45925181440159	0.400404559972062
DNM1	1	1	-2.30547516874119	-0.863456857798324
DNM3	1	1	-2.84866993955418	-0.922291172144638
DOCK10	1	1	-1.36988204053684	-2.77805866062425
DOCK2	1	1	-1.29386251500889	-2.87002147495531
DOCK3	1	1	-2.37971633008762	-0.220115316508041
DOCK4	1	1	-1.43044155172153	-2.8184462910869
DOCK6	1	1	-2.76561110547825	-2.64200795948289
DOCK8	1	1	-1.38271182111545	-2.78874172031663
DOCK9	1	1	0.721530444109002	-2.04574550449632
DOK1	1	1	-2.37214224866672	-1.43155802547716
DOK4	1	1	-0.367995911157569	0.73920993745543
DOK5	1	1	-3.40841477445408	-1.64744938671373
DOK7	1	1	-0.831246071374854	-1.14187301456712
DPF3	1	1	-1.64207451871677	-0.939720523951278
DPP10	1	1	-2.53305619291111	0.0713875168583531
DPP6	1	1	-2.75182383588596	0.244228112103714
DPY19L1	1	1	-2.18297141126438	2.36251650989272
DPYD	1	1	-0.99004452756687	-2.64525951206468
DPYS	1	1	-0.776136332071265	0.281146036984696
DRAM1	1	1	-0.831620150125464	-1.6989325410106
DRGX	1	1	-1.64921920827671	-1.15718878567003
DSCAM	1	1	-2.71108906797214	0.318815457227005
DSCAML1	1	1	-2.48838561109348	-0.0315986996867519
DSE	1	1	-3.46510785154148	2.59497176349379
DSP	1	1	0.598436004602472	-1.07252420246385
DST	1	1	-0.525216274774512	-1.05576146900438
DSTN	1	1	-3.72596591047092	-0.928759945032821
DTL	1	1	2.41151256033138	1.63199775904633
DTNA	1	1	-2.32596867612644	-0.444136512873397
DTNB	1	1	0.704528040372888	-0.394988430140243
DUOX1	1	1	-1.23690074018284	-0.654284132120834
DUSP1	1	1	0.175556606733362	-3.11740602314256
DUSP10	1	1	0.442765957796136	-3.10388864338182
DUSP13	1	1	-4.10551207593723	-0.117669237253891
DUSP15	1	1	-1.37658827832981	0.433997022511734
DUSP4	1	1	-1.01703160337253	-1.43224490940355
DUSP6	1	1	-1.08497875264927	-1.37398876011156
DUSP8	1	1	0.222906298124353	-3.12656463444017
DVL1	1	1	1.16578937240795	2.38722853601195
DYM	1	1	0.879145211660425	0.303897249104752
DYNC1I1	1	1	-3.04518502286716	-0.00934053718827776
DYSF	1	1	-2.87688439420505	-2.57263149082445
DZIP1L	1	1	-0.521458797967871	1.73111509025313
E2F1	1	1	2.38597012230114	1.63450525939681
E2F2	1	1	2.4514852232571	1.69958924740769
EBF1	1	1	-2.88420956662937	-2.1661070710399
EBF2	1	1	-2.93971627286716	-2.20564283191942
EBF3	1	1	-2.92828410199924	-2.00555552303575
EBF4	1	1	-1.39151161245151	0.595837222935929
EBNA1BP2	1	1	1.30851114460186	2.24920813977934
ECE1	1	1	-2.0483869843845	-1.11239661037706
ECHDC2	1	1	-0.712795191324195	1.4258773052714
ECM1	1	1	-2.67054217389866	-1.63361705600999
EDAR	1	1	-0.696464233911475	-1.26141060650133
EDARADD	1	1	-0.610887699640235	-0.77833522617601
EDIL3	1	1	-3.34777253202244	-1.64719022571825
EDN2	1	1	0.190395183050195	-1.00760878383897
EEF1A2	1	1	-2.17163866094395	0.935130404832138
EEPD1	1	1	-1.14012973836704	-0.238834989664779
EFCAB2	1	1	-0.870271854913672	2.09256194770552
EFCAB5	1	1	-2.63404028943821	-0.143395913241134
EFCAB6	1	1	-0.955594950235327	2.4866827601216
EFHC1	1	1	-1.04034750989719	2.32130180537917
EFHD1	1	1	-1.2241784863834	-0.567365539667831
EFHD2	1	1	1.08817628689961	2.11733059823729
EFNA5	1	1	-0.305980020082434	-1.40738595783495
EFNB2	1	1	0.503877765619317	-1.78054179012559
EFR3B	1	1	-1.54056017926975	-0.897591007349716
EFS	1	1	-0.315251045740088	-0.474855554697738
EGFL7	1	1	-2.73949568799778	-2.55897630512498
EGFLAM	1	1	-3.03654902509495	-2.2533759003856
EGFR	1	1	-2.55812185338779	-0.0954367047526699
EGLN3	1	1	0.362617320501367	1.67094232380606
EGR1	1	1	0.221635050260583	-3.13047136127733
EGR2	1	1	0.263113922559778	-3.16401494800829
EGR3	1	1	0.222670144521753	-3.13957370579027
EHD2	1	1	-0.354618840730628	-1.94707621395372
EHF	1	1	0.563013798677484	-0.872722995875106
EIF4E3	1	1	0.984739816867868	0.661891209485306
EIF4G3	1	1	1.17229138978676	2.34887103975035
ELAVL3	1	1	-2.56488268903538	0.599452304246201
ELF1	1	1	0.804977364027063	-2.27483714878343
ELF2	1	1	1.64068420895294	-1.23774827778123
ELF3	1	1	0.659990257703821	-0.840166223643051
ELF4	1	1	-0.836670570886572	-2.31298936664842
ELFN1	1	1	-2.91601985029026	-2.4562145596721
ELFN2	1	1	-1.79247348836704	0.328214394452347
ELK1	1	1	1.18760458298878	1.01096259296156
ELMO1	1	1	-1.69647090963169	-2.71718992054246
ELN	1	1	-3.10605185560032	-1.4119476205089
ELOVL1	1	1	-1.27123849920078	0.457450615765824
ELOVL6	1	1	1.64923635789112	-1.21514715015672
ELP2	1	1	0.751325792753259	0.252425538899674
EMCN	1	1	-2.77068465284153	-2.4333087331035
EMILIN2	1	1	-1.06547253660007	-2.69672693073534
EML1	1	1	-1.99829667142673	0.670551704766526
EML6	1	1	-1.50869386724277	-0.232946885225997
EMP1	1	1	0.542844242536584	-2.7290212041118
EMP3	1	1	-0.364129715478858	-1.93618811428331
EMX1	1	1	-1.98112099698826	0.217707025410904
ENDOU	1	1	-0.37465887597843	-0.386420739290939
ENG	1	1	-2.83278887800022	-2.6087876683452
ENO1	1	1	0.881384558164636	2.04312731564261
ENO2	1	1	0.369949287855188	1.6758220890186
ENOX1	1	1	-2.9521989159946	-1.45663799106859
ENPP1	1	1	-2.07267396978184	-0.590040100214706
ENPP2	1	1	-1.57641141942783	0.266841160657181
ENPP3	1	1	-0.858636074579199	0.158157932164444
ENTPD2	1	1	-0.825603180444678	-0.0738566046931606
ENTPD8	1	1	-0.648156099832495	0.433573829533829
EPAS1	1	1	-2.55600135854526	-2.52622188389085
EPB41	1	1	1.16305174597458	2.33228646457411
EPB41L1	1	1	-0.0711724095706545	-0.375930083391891
EPB41L2	1	1	-3.20856278470798	2.10736935079314
EPB41L3	1	1	-1.42326467565342	-2.59067834675096
EPB41L4A	1	1	-0.131024294412573	-0.339475405810104
EPB41L4B	1	1	0.382582253896753	-0.964756620524154
EPB41L5	1	1	0.972092039072076	-0.104203713534103
EPB42	1	1	-2.10114925435825	-1.84604634105943
EPDR1	1	1	-1.82924144796177	1.11719225585677
EPHA10	1	1	-2.06931036046787	0.734026955964341
EPHA2	1	1	0.16101486154751	-2.54383624851488
EPHA3	1	1	-3.03400748304172	-1.4949599629619
EPHA4	1	1	-1.92728965810581	-1.70592702686571
EPHA6	1	1	-2.77400534681126	-0.408657324908004
EPHA8	1	1	-2.27713101438328	0.84779660642363
EPHB1	1	1	-2.11895602277561	-0.448140037653671
EPHB2	1	1	-1.25614469579502	-1.18433297931932
EPHB3	1	1	0.195849246465722	-0.114659679529892
EPHX1	1	1	0.030316180669824	0.847691583039536
EPM2A	1	1	-3.52218335202976	2.70564781367995
EPN3	1	1	0.54931504198269	-0.943188083765731
EPS8	1	1	-0.00535696080966819	0.639020966889634
EPS8L1	1	1	0.569175667249719	-0.785848749277816
EPS8L2	1	1	0.799957699262658	-0.906029117701278
ERBB3	1	1	0.596436268770257	-0.47356284916185
ERBB4	1	1	-2.00793355039402	-0.764336240885482
ERC2	1	1	-2.58854501775547	-0.410334957239852
ERG	1	1	-1.47858112386509	-0.699758661387191
ERI3	1	1	1.43972244032578	2.24471055209853
ESPN	1	1	-0.432042055643042	0.131777512433304
ESR1	1	1	-1.81006305745884	-0.920202863810287
ESRP1	1	1	0.614544755899469	-0.866246116755233
ESRRB	1	1	-1.89560549787327	-0.196592343447433
ESRRG	1	1	-0.744077616250952	-0.0450681573130947
ESYT1	1	1	-1.93421762517734	-1.89217270672105
ESYT3	1	1	-1.34537404111668	-0.319885504839645
ETHE1	1	1	-0.0638057523135744	-0.257054818270431
ETNK2	1	1	-0.679637365854224	0.225128757359757
ETS1	1	1	-2.40675967267795	-2.43505824863695
ETS2	1	1	0.175993627988855	-2.93314088642381
ETV1	1	1	-2.28115432790562	-1.38856567203783
ETV4	1	1	-1.04788201383396	-1.30117024242662
ETV5	1	1	-1.05974953702732	-1.30304707348131
EVC2	1	1	-1.18335836461826	0.953650640847458
EVL	1	1	-2.20829289487644	-0.914835107920394
EVPL	1	1	0.630199439012567	-1.0152646428325
EVX2	1	1	-2.06804316571995	-0.434105527994857
EXOSC10	1	1	1.13518045016483	2.37978373706557
EXPH5	1	1	0.333366579496423	-1.03117526829027
EXTL1	1	1	-2.95199196866794	-1.19530261814378
EYA1	1	1	-3.09845202497288	-0.294534338114486
EYA2	1	1	-1.09980576566501	-0.311964047548996
EYA4	1	1	-2.98563235334202	-0.109583032725082
EYS	1	1	-1.06620138219639	0.646994697453751
EZH2	1	1	2.45490641065792	1.72637988865591
EZR	1	1	-3.50161164335056	2.65657733619429
F11R	1	1	0.706574744665185	-1.08851803600572
F5	1	1	-1.3129669957523	-0.613773477671371
F8	1	1	1.01483736106114	1.01026414573409
FA2H	1	1	0.179024047338525	-0.506874454615341
FAAH	1	1	0.816292471372644	-0.441036117670761
FADS3	1	1	0.30892688699917	0.786270784737839
FADS6	1	1	-0.732033424890479	0.165503012540116
FAF1	1	1	1.44286155619578	2.20048527658202
FAH	1	1	-3.65572302869602	1.66683460265614
FAIM2	1	1	-1.07047384313389	-0.633170974848495
FAM107A	1	1	-2.19152014783665	-1.04363812267564
FAM107B	1	1	-0.661526613748511	-0.486738575098739
FAM110A	1	1	0.135002202474634	-0.94924677669786
FAM110B	1	1	-2.30212729505344	-0.680266035197006
FAM120B	1	1	-3.54556553891941	2.68776308238722
FAM124A	1	1	-3.62038891843601	-1.03408016025804
FAM126A	1	1	-2.17651932767673	2.3634966486714
FAM135B	1	1	-2.54501479200168	-0.347799313662277
FAM13A	1	1	0.979991502248803	-1.1527546769359
FAM155A	1	1	-2.88860981992527	-0.922153604624496
FAM160A1	1	1	0.665161318265954	-0.963405025599227
FAM163A	1	1	-1.99700873426243	-2.25601638614915
FAM167A	1	1	-1.46388047269626	0.285668837430253
FAM169B	1	1	-0.722395830667456	0.688856589200272
FAM171A1	1	1	-1.51225441030308	-1.2769481068828
FAM174B	1	1	-0.248560481584509	-1.06067003071092
FAM178B	1	1	-1.42299025586887	0.165789949300065
FAM184A	1	1	-1.85345976880833	-0.550535095331893
FAM184B	1	1	-2.26834219030186	-0.455994737742172
FAM189A1	1	1	-2.33212798169895	-0.810626638529525
FAM189A2	1	1	-1.44128888181492	-0.846006286738143
FAM193A	1	1	1.66382495232777	-1.57863844692491
FAM20A	1	1	-1.5695268445377	-1.90875114261888
FAM20C	1	1	-1.42626016668125	-1.85519493877672
FAM47E	1	1	-0.999510937250098	2.33273004234053
FAM53A	1	1	1.60489845939831	-1.64004696666978
FAM78A	1	1	-1.44846146634861	-2.87840713321947
FAM78B	1	1	0.111813134634057	0.0755766505024571
FAM83A	1	1	-0.0846642785434328	-0.664429796335922
FAM83B	1	1	0.130305833303491	-0.895957601664291
FAM83F	1	1	0.694031245195428	-0.979867590067611
FAM9B	1	1	-1.10578291944309	0.737130808236374
FANK1	1	1	-1.03224556974216	2.29885463655211
FAR2	1	1	-1.73060720495029	-1.53834761440538
FARP1	1	1	0.749462313139001	-2.21462668239854
FAT1	1	1	0.0702443785305418	0.0766630047581334
FBLIM1	1	1	-3.06998246244236	-2.30931319057725
FBLN1	1	1	-3.13098042539402	-1.4484614258983
FBLN2	1	1	-3.43453496030613	-1.6269601708629
FBLN5	1	1	-3.14125912717625	-1.35868848621629
FBLN7	1	1	-1.79624193242832	0.29734836757399
FBN1	1	1	-3.51753752759739	-1.68990291416429
FBN2	1	1	-2.28666465810581	-0.55938352405809
FBP1	1	1	0.042565412008325	0.0196163529179234
FBXL13	1	1	-1.09651392034336	2.25660602987029
FBXL16	1	1	-1.85159199765964	0.720588492753281
FBXL18	1	1	-1.89235108426853	2.66856657207228
FBXL5	1	1	1.67378614016728	-1.58497608959459
FBXL7	1	1	-3.01082175306126	-1.0909437066295
FBXO41	1	1	0.635263032400171	0.987951266171708
FCHO1	1	1	-1.50501339963718	1.06579421699263
FER1L5	1	1	-1.26093595556064	1.13613631069876
FER1L6	1	1	-0.617452078378638	0.392610895039811
FERMT2	1	1	-3.61119025281711	-1.08725012600206
FERMT3	1	1	-1.16669290593906	-2.91366399585985
FGD2	1	1	-1.28148668340488	-2.86042608082079
FGD3	1	1	-1.2485138707523	-1.91035569965623
FGD5	1	1	-2.82842104963108	-2.59964097797655
FGD6	1	1	-0.977106028116187	-1.42930926143907
FGF1	1	1	-2.68130391172214	-0.861878049967514
FGF11	1	1	0.391614026510278	1.67342067003466
FGF12	1	1	-2.97710602811619	-0.205049884913192
FGF13	1	1	-1.92467420629307	-0.309797657129989
FGF14	1	1	-3.42492669156834	-1.558355463145
FGF18	1	1	-1.78314893773838	-0.988055360911117
FGFR1	1	1	-2.68891327909275	-1.30047334491991
FGFR2	1	1	0.239089555227319	-0.254836452601181
FGFR3	1	1	1.14930985041813	-1.35449231922411
FGFR4	1	1	-0.523739867723426	0.667395758034958
FGFRL1	1	1	-0.698839836633643	-1.18975914776109
FGGY	1	1	0.978144354307214	2.48523919522978
FHAD1	1	1	-1.1284479432468	2.23546950757719
FHDC1	1	1	0.625099069559137	-0.838963401911483
FHL2	1	1	-0.472650700128516	-1.12094200908922
FHOD3	1	1	-0.665930204904517	-0.935005558130966
FIBCD1	1	1	-2.44645779660984	-1.56615151226305
FIG4	1	1	-3.46553032926365	2.7086248272679
FIGN	1	1	-2.90860455564304	-0.234093201754318
FIGNL1	1	1	-2.19168751767918	2.52088116348006
FILIP1	1	1	-3.61997216275974	-0.685226572153793
FILIP1L	1	1	-3.64941113523289	-1.67087329685472
FKBP5	1	1	0.0768147177334226	-2.5706001645305
FKBP9	1	1	-2.1671122842197	2.49556569993712
FLI1	1	1	-1.97967212728306	-2.74716771900438
FLNA	1	1	-3.68899148038669	-0.958033693430648
FLRT2	1	1	-2.95310395292087	-1.24128950893663
FLT1	1	1	-2.87858527234836	-2.47363151371263
FLT4	1	1	-2.86432211927219	-2.58624852955125
FLVCR2	1	1	-0.978115015542945	-2.71735776722215
FMN1	1	1	-0.107836776292761	-1.24314678966783
FMN2	1	1	-2.65594237378879	0.272563921811356
FMNL1	1	1	-1.39389794400974	-2.86455406009935
FMNL3	1	1	-2.72964804700657	-2.49787772953294
FMO1	1	1	-3.43100112012668	-1.46987832844041
FMO5	1	1	-0.132542186296424	0.34634374320723
FNDC3A	1	1	0.798585421525995	-2.28912032902025
FNIP2	1	1	1.49984516867355	-1.13591755687975
FOS	1	1	0.231939143621484	-3.14863122761034
FOSL2	1	1	0.208124346220056	-3.08726705372118
FOXA1	1	1	0.0809263653393186	-0.564311636088119
FOXA2	1	1	-0.615043573892554	0.654702889325394
FOXA3	1	1	-0.583915763414343	0.751014041306748
FOXC1	1	1	-0.133881383455237	-0.8232172852733
FOXC2	1	1	-2.80697577527805	-2.03075589000963
FOXJ1	1	1	-1.10073178342625	2.2499792450688
FOXJ3	1	1	1.41290360747756	2.14535980165221
FOXK1	1	1	-1.92387478879734	2.5934486264012
FOXM1	1	1	2.46424633928494	1.59663623251237
FOXN1	1	1	-0.519367628610572	-0.555547369120346
FOXO1	1	1	0.350924558126489	-2.4703222638347
FOXO3	1	1	-3.50039332441135	2.65237532794692
FOXO4	1	1	1.19088921614842	0.951802420022263
FOXP2	1	1	-2.86589997342869	-0.516425979731308
FPR1	1	1	-1.05011385015293	-2.81520189106248
FRAS1	1	1	-0.986749821222266	-0.0286920195796352
FREM2	1	1	-1.02380531362339	-0.0629508620478969
FRMD3	1	1	-2.37059634259983	-2.21360935032152
FRMD4A	1	1	-1.77638166478916	-2.10794104397081
FRMD4B	1	1	0.717483169519464	0.483499037625565
FRMD5	1	1	-2.10820906690403	-1.04414881527208
FRMD6	1	1	-0.390918069398841	-0.492293727991806
FRMPD4	1	1	-2.70376771024509	-0.353043211100326
FRY	1	1	-1.89550273946567	-1.4171942597606
FSCN1	1	1	-0.998099260843238	-0.93887342273973
FSIP1	1	1	-1.06065028241917	2.13378410279967
FSTL4	1	1	-0.543711476839026	-0.794341457483993
FTH1	1	1	0.170193380796472	0.8675666326306
FURIN	1	1	-1.20835679105564	0.75091259420134
FUT7	1	1	-1.69900243810459	-2.91073430835985
FUT9	1	1	-2.43022673658176	-0.29153193294786
FXYD2	1	1	-0.61324542096897	0.51510869205214
FXYD3	1	1	0.55148459144787	-0.833263767359481
FXYD6	1	1	-2.81011384061619	-0.715389145014511
FYN	1	1	-2.23406355909153	-2.13938702404283
G3BP2	1	1	1.71962568827824	-1.37150038540147
G6PD	1	1	0.00838489004329812	0.865658032300248
GAB1	1	1	1.59255460568623	-1.31497205555223
GAB3	1	1	-1.23360579541965	-2.87004483997606
GABBR2	1	1	-2.29591410688206	-0.2649657851436
GABRA5	1	1	-2.34917204908176	0.031312929990067
GABRB3	1	1	-2.17800062230869	0.281126605870499
GABRG3	1	1	-2.10193102887913	-0.209803832171188
GADD45G	1	1	-1.00694101384922	-2.46716607868455
GAK	1	1	1.64279461570934	-1.61467541515611
GAL3ST4	1	1	-1.34166949323459	-2.5967289334514
GALE	1	1	1.06195122667507	2.2388685816548
GALM	1	1	-0.244239383256873	0.209336625935807
GALNT12	1	1	0.248246497594873	-0.599959266779647
GALNT13	1	1	-2.83501046232029	-0.180784237978683
GALNT14	1	1	-0.715551548517188	-0.789394271967636
GALNT6	1	1	-0.91705720952793	-0.335712922213302
GALNT7	1	1	0.195475882970849	-0.409491193888412
GALNT9	1	1	-1.7414051823978	0.111513482930436
GALNTL6	1	1	-1.56637733510776	-1.35147227108263
GAS2	1	1	-0.784602098978003	0.579786228539719
GAS6	1	1	-1.08198445371433	-0.877571714518295
GAS7	1	1	-3.05822032026096	-1.45599688350938
GATA1	1	1	-1.19758837751194	-1.85813607036851
GATA2	1	1	-2.10492079786106	-1.10469211399339
GATA3	1	1	-1.37898200086399	-0.659395349619613
GATA4	1	1	-0.668069534814795	0.619214939477219
GATA6	1	1	-0.649936371362647	0.606444048287644
GBE1	1	1	0.314424581014673	1.50460205465771
GCGR	1	1	-1.50472062162205	-0.0839178687312465
GCK	1	1	-1.35118191770359	1.20130528748251
GCLC	1	1	0.054578728162805	0.903812813164963
GCNT1	1	1	-1.18468945554539	-0.0844926959254604
GCNT2	1	1	-0.0298886828784548	0.778342294099106
GCOM1	1	1	-0.454237990892371	-0.913617981074081
GDAP1	1	1	-1.88720911077305	0.86387543618895
GDF15	1	1	0.339289493047754	-2.71717132389329
GDPD5	1	1	-1.22089427045627	-1.02650750934862
GET4	1	1	-2.19532936147495	2.56495146692015
GFAP	1	1	-2.77757733396335	0.279710876347794
GFI1B	1	1	-2.68139975599094	0.553651677968277
GFPT2	1	1	-3.27940600446506	-1.32408512890123
GFRA1	1	1	-2.30551069310947	-0.792806757090316
GGT1	1	1	-0.6160663895969	0.67499946296431
GGT5	1	1	-3.27160351804539	-1.60084689914964
GHR	1	1	-2.67512314847751	-0.94655598461412
GHRHR	1	1	-1.52092617086216	-0.324001682398544
GIPC2	1	1	-0.570284181154212	0.662225651147141
GIPR	1	1	-1.33989732793613	1.66707454860426
GJC2	1	1	-1.27893941930576	0.348679291608109
GLDN	1	1	-1.13003819516941	-2.36606324970506
GLI1	1	1	-1.85928195050999	-0.161455882189498
GLI2	1	1	-2.16207783750339	-0.641193044779525
GLI3	1	1	-0.530213289773902	-0.651990306971298
GLIPR2	1	1	-1.14789789251133	-2.88845695316576
GLIS1	1	1	-1.2240826421146	0.23581718147017
GLIS3	1	1	0.356269187414209	-0.143072140810714
GLT1D1	1	1	-1.9949235253696	-0.00876725971482806
GM2A	1	1	-0.903107338464697	-2.60540498554491
GMDS	1	1	-0.347220950639685	-0.785249364969955
GML	1	1	-0.734629326379737	-2.38277305423997
GMPR	1	1	-0.889989786661109	-1.55669630825304
GNA12	1	1	-2.17760556272312	2.55731933057524
GNA14	1	1	-0.889533215082129	-1.33205117046617
GNAI3	1	1	1.44439125724987	1.87394036591269
GNAL	1	1	-3.05630868009373	0.572130905987992
GNAO1	1	1	-2.81088583997532	0.213224756123795
GNAZ	1	1	-2.00173538259312	0.783191668393387
GNB1	1	1	1.22446302243427	2.28917734563567
GNG12	1	1	1.45711281069473	1.88916822016455
GNG13	1	1	-2.64906018308445	0.0184984082005162
GNG2	1	1	-1.91633170179172	-2.31436027347826
GNG4	1	1	-2.44859903386875	0.920180665852799
GNG7	1	1	-2.65800803235813	-0.609459055063949
GNGT1	1	1	-3.20450585416599	0.110066520573868
GPA33	1	1	-0.818803482568701	-0.599535358546005
GPC3	1	1	-2.2679333024387	-0.513991010782943
GPC4	1	1	-0.685633354700049	-0.541987312433944
GPC5	1	1	-2.768160276926	-0.210420621035324
GPC6	1	1	-3.65050881437107	-1.62870134174608
GPR137B	1	1	-0.788318567789038	-1.47201813518785
GPR146	1	1	-2.13130872777744	-2.02078093349718
GPR156	1	1	-2.67627089551731	0.493381726147904
GPR158	1	1	-3.21692460111423	0.0864245766422886
GPR160	1	1	0.0769582457180418	0.55499898135878
GPR161	1	1	0.553803271734277	0.0886367434284825
GPR39	1	1	0.0134319729442991	-0.815241945383773
GPR78	1	1	-0.390651398218115	-0.646470916865097
GPRC5A	1	1	0.306467480146448	-0.474126709101425
GPRC5B	1	1	-0.91655295423313	-0.0934701091029506
GPSM1	1	1	-2.09769123128696	0.708094345929398
GPT2	1	1	-0.447051816499671	0.44701729953505
GRAMD1B	1	1	-0.854105883157691	0.533984171750321
GRAP2	1	1	-1.75457661680027	-2.96199191868089
GRB10	1	1	-2.90016835264011	-2.6119409924724
GRB14	1	1	-0.688753061807593	0.631404446961655
GRB7	1	1	0.690548843824426	-0.967157495615707
GREB1	1	1	-1.7273351483707	-0.801194799540268
GREB1L	1	1	-2.61119216016575	-0.274615777132736
GRHL1	1	1	0.0304403967495359	-0.811427248118148
GRHL2	1	1	0.547401792490045	-0.900623691675888
GRHL3	1	1	-0.106684976137122	-0.643347395060287
GRIA4	1	1	-2.79608290723606	0.0667577856800694
GRID1	1	1	-2.77515738538547	-0.701897752878891
GRID2	1	1	-2.9651612573032	-0.0162284499385219
GRID2IP	1	1	-2.14369051984592	2.54991130769469
GRIK3	1	1	-2.57748096517368	-0.574390543101059
GRIK4	1	1	-2.22089784673496	0.0313825482151646
GRIK5	1	1	-2.75173228315159	0.207764613034501
GRIN1	1	1	-1.90867131284519	0.841575371625199
GRIN2A	1	1	-2.63383238843723	-0.659497631190048
GRIN2B	1	1	-2.82086318067356	-0.249089849589096
GRIN2C	1	1	-1.70492547086521	0.793931233289017
GRIN2D	1	1	-1.89339464238926	1.1395341032765
GRIP1	1	1	-1.37795584729954	0.163981663586869
GRIP2	1	1	-3.7174281411533	-0.493157041666732
GRK5	1	1	-2.53219192556187	-2.51205219089769
GRM4	1	1	-2.64076560071751	0.437657462956681
GRM5	1	1	-1.25365751317783	2.03230048954703
GRM7	1	1	-1.66238754323765	-0.468392027018295
GRM8	1	1	-2.35742991498752	-1.05147565662645
GRTP1	1	1	0.794634587251703	-2.15054096042894
GSDMA	1	1	-0.54374223283573	-0.155584228632675
GSG1	1	1	-0.711470537698706	0.394236075284256
GSG1L	1	1	-2.59096043638035	0.441912757756485
GSN	1	1	-2.14816468290134	-1.70037759601854
GSTM5	1	1	-3.0908502869968	-1.28787554561876
GTDC1	1	1	-3.37863581708713	2.57494102657057
GUCY1A2	1	1	-2.9657077126865	-2.46577132999681
GULP1	1	1	-1.56275098851963	-0.284717810747848
GXYLT2	1	1	-3.51691620878025	-1.53803671657823
H6PD	1	1	1.17405112751679	2.3836394423268
HABP2	1	1	-0.584350281274756	0.664153622987046
HAPLN1	1	1	-2.86384337476536	-1.6987067586162
HAS2	1	1	0.0710235304470457	-2.96667827427171
HAUS7	1	1	1.30327874340967	1.09227966010786
HBG2	1	1	-1.37791889241978	-2.09705365955614
HCN2	1	1	-2.32007377675815	1.02125989139296
HCN4	1	1	-2.52791159681126	0.425705181958451
HDAC1	1	1	1.19883749552921	2.16927682101942
HDAC7	1	1	0.167604274236719	0.0510293120167393
HDAC8	1	1	1.24696198769764	1.02584766090132
HDAC9	1	1	-0.674539261377295	-0.824237716791854
HDDC2	1	1	-3.44389241269871	2.60378895938612
HECW1	1	1	-1.21438854268833	0.152650462987198
HECW2	1	1	-2.83152955106541	-2.54592288791917
HEG1	1	1	-2.72445242933079	-2.46447051822923
HERC3	1	1	1.78715962835507	-1.1992372399547
HES1	1	1	0.0823583073254026	-2.99159110843919
HES2	1	1	-0.137963943994483	-1.53631271183275
HES5	1	1	-2.29719751409336	-1.36390818416856
HES7	1	1	-2.07932560972019	1.2747489982865
HEY1	1	1	-1.84489148191257	-1.77085007488512
HHIPL1	1	1	-2.12253110936924	0.950843142869248
HIC1	1	1	-3.43357222608372	-1.99459542095445
HIF3A	1	1	-1.40291278890415	0.484929072263016
HIPK1	1	1	1.4462154648538	1.90450318396307
HIVEP2	1	1	-3.47988217405125	2.60279868781783
HIVEP3	1	1	-0.738832169092139	-2.00758231937669
HK2	1	1	0.35546225973324	1.66823364287831
HKDC1	1	1	-0.477775269067725	0.656544672848954
HLA-DMA	1	1	-1.19313662580295	-2.98885549366258
HLF	1	1	-1.49381607106968	-1.2529527074077
HMCN1	1	1	-3.07814972928806	-1.36726654827379
HMGA2	1	1	-1.36700861982151	-1.03891981899522
HMGB1	1	1	0.801993078672449	-2.26808084308885
HMGCL	1	1	1.15617120929913	2.34997211635329
HNF1B	1	1	-0.367568784273108	0.633161770703568
HNF4A	1	1	-0.592184715784033	0.732260631921067
HNF4G	1	1	-0.629794292962989	0.749079632165207
HOMER2	1	1	-1.64760320714756	-0.480888260004745
HOXA10	1	1	-1.79638236097141	-0.847457302210556
HOXA3	1	1	-1.70451872876926	-1.01319683849596
HOXA9	1	1	-1.86592310003086	-0.91301859676622
HOXB3	1	1	-1.78070967725559	-1.02705634891771
HOXB6	1	1	-1.83039181760593	-1.10103143512987
HOXB7	1	1	-1.801518612421	-0.95534504711412
HOXC13	1	1	-1.76904433301731	-0.385387313959823
HOXC4	1	1	-1.74341457418247	-0.764631641504989
HOXC6	1	1	-1.78340595296665	-0.725492132303939
HOXD13	1	1	-2.12936370900913	-0.523015869257675
HOXD3	1	1	-1.7258760266666	-0.775608671305404
HPCAL1	1	1	1.10544777580456	1.12334008753516
HPSE2	1	1	-3.4900783830051	-0.878334892389999
HR	1	1	-2.39688151410862	-0.874443424341903
HRC	1	1	-4.04966919950291	-0.188380849955307
HRH1	1	1	-0.794473343408545	-1.46368612110399
HRH3	1	1	-2.64102452329441	0.392623054387345
HRK	1	1	-2.59641926816746	0.42534457385756
HS2ST1	1	1	1.49080267467455	1.88937606156088
HS3ST3B1	1	1	-1.67488115361973	-1.86998356640123
HS3ST5	1	1	-1.69523423246189	-0.263690364954696
HS6ST1	1	1	-0.77695220044895	-0.336651695368515
HS6ST2	1	1	-0.780356102502783	-0.796157968638168
HS6ST3	1	1	-2.2105054192905	0.225301014783158
HSD17B14	1	1	-0.0673203997974001	0.199942457082047
HSF2	1	1	-3.54420178464695	2.69623540580489
HSF2BP	1	1	-1.33042042783543	1.17983781039931
HSPA12A	1	1	-1.75997870496555	-0.653745544550643
HSPB1	1	1	-1.99141185811802	1.0380532020352
HSPB7	1	1	-3.82642834714695	-0.504874837992416
HSPB8	1	1	-3.49551957181736	-0.38976408302568
HSPG2	1	1	-3.01780169538303	-2.36645711719774
HTT	1	1	1.67950794764713	-1.59724367916368
HUNK	1	1	-2.27956789068027	-0.938830507395492
HUS1	1	1	-2.19518821767612	2.54204885900237
ICA1	1	1	-1.96168773702427	2.28716765582777
ICAM1	1	1	-0.337536030328711	-2.48518813907884
ID1	1	1	-2.27233474782749	-1.29546941578172
ID2	1	1	-2.22359793714329	-1.33165444195055
ID3	1	1	-2.30093639425083	-1.30196203052782
IDUA	1	1	1.6379132784243	-1.61025728046678
IER2	1	1	0.240661329710046	-3.15826047718309
IER5L	1	1	-0.132185392892798	-2.88003743946336
IFFO1	1	1	-1.40068882039829	-2.63885368168138
IFFO2	1	1	0.583874649488489	1.21724049985625
IGDCC3	1	1	-1.9582888417606	0.23831938445784
IGDCC4	1	1	-1.94499295285984	0.168429481389298
IGF2BP1	1	1	-1.58570211461826	0.280113684537186
IGF2BP2	1	1	-1.30382364324375	-1.1259619122722
IGF2BP3	1	1	-1.49931233457371	0.245307909848465
IGF2R	1	1	-3.57190983823582	2.70996950805403
IGFBP2	1	1	-1.83193080953403	-0.32548083126329
IGFBP5	1	1	-3.31197588971897	-1.52465976536058
IGFBP7	1	1	-3.20016282132908	-2.18796862423204
IGSF11	1	1	-2.87157385877415	-0.107146394846664
IGSF21	1	1	-1.21446602872654	-2.83667339145921
IGSF3	1	1	0.119515008413354	-1.06652272999071
IGSF5	1	1	-0.694616489923438	-0.188960803148971
IGSF9	1	1	0.590851492368738	-1.01483644306444
IKZF3	1	1	-1.83317273191257	-2.8094655400493
IL11	1	1	-0.259149842775305	-2.96834148227953
IL16	1	1	-1.5923630528812	-2.82620681583665
IL17B	1	1	-2.8280534081821	-0.967349422571884
IL17D	1	1	-3.27127116254612	-0.797816646692977
IL17RD	1	1	-3.31721108487888	-1.14413703739427
IL17RE	1	1	0.896659678899804	-0.250947011111007
IL17REL	1	1	-1.62613623670383	-1.99277890980028
IL19	1	1	-1.06583326391025	-0.473639143107162
IL1R1	1	1	-1.85626690915867	-1.70987595379137
IL1RAP	1	1	-1.42715066007419	-0.962526453135238
IL1RAPL1	1	1	-2.69909661344334	-0.242892993090377
IL1RAPL2	1	1	-2.42255013517185	-0.0953745967128139
IL1RL2	1	1	-0.303409987009009	0.000849353673233466
IL2RB	1	1	-1.68731492093845	-3.02360786258958
IL34	1	1	-1.59241240552708	-1.56002320110582
IL4I1	1	1	-1.04254572919651	-2.88451064884447
IL4R	1	1	0.0329803890819944	-2.17112292110704
IMPA2	1	1	-0.492742949045142	0.503924953343644
INHA	1	1	-1.05997818044468	0.66395883500792
INMT	1	1	-3.03989499143406	-1.27093685924791
INO80C	1	1	0.84353519149975	0.315527307393326
INPP4A	1	1	-1.87238925031467	-2.52168144047044
INPP4B	1	1	-0.283288174188574	-1.0341183072307
INPP5B	1	1	1.40063060925261	2.19421325862624
INPP5D	1	1	-1.34228294423862	-2.66051067173265
INS-IGF2	1	1	-1.27592628530308	0.325578796269669
INSM1	1	1	-2.49934166005894	0.662901210191025
INSR	1	1	-2.87342780164524	-2.61986650287889
INTS1	1	1	-2.17530291608616	2.59041892230727
INTS12	1	1	1.6175364471312	-1.26362718403123
IP6K3	1	1	-3.85300581983372	-0.324981225130783
IPCEF1	1	1	-1.87713425687595	-1.88428963482164
IQCA1	1	1	-1.29429071477695	0.751082646252884
IQCG	1	1	-1.02845686010166	2.32885281980254
IQCH	1	1	-0.960918121850928	2.37460445106245
IQCJ	1	1	-3.23388188413425	0.0946148508808751
IQGAP2	1	1	-1.37716835073276	-0.696327579615341
IQGAP3	1	1	2.39894337125973	1.68030741304375
IQSEC2	1	1	1.01350919076161	0.795409011246933
IQSEC3	1	1	-2.60922854474827	0.68745737016417
IRAK2	1	1	-0.366198235071143	-2.01902164280199
IRF2	1	1	1.58650707372383	-1.17925132572435
IRS1	1	1	-0.293400459802588	-1.02728141605638
IRX3	1	1	-0.413767390764197	-1.11759890377306
IRX4	1	1	-1.33822911313816	-0.472380054590927
IRX5	1	1	-0.708405666864356	-1.14681137859605
ISL2	1	1	-1.77329271367832	-0.343245399592147
ISM1	1	1	-3.30917637876316	-1.54377521335863
ISYNA1	1	1	-1.27258985570713	1.07671438396193
ITGA1	1	1	-3.10887711576267	-2.37218059360765
ITGA11	1	1	-3.60837214521213	-1.7582656270244
ITGA2	1	1	-0.326021605051001	-0.968408716318832
ITGA3	1	1	-0.0901554160480105	-1.08007777988695
ITGA5	1	1	-3.22747939161106	-2.27275623142503
ITGA6	1	1	-0.597819977319678	-0.861209762690292
ITGA8	1	1	-2.93837397626682	-2.05831302463792
ITGA9	1	1	-2.53606169751926	-1.62791003048204
ITGAL	1	1	-1.46270745328709	-2.925045621989
ITGB1	1	1	-3.09040778211399	-2.39413131534837
ITGB2	1	1	-1.13158648542209	-2.88520110904954
ITGB3	1	1	-1.83626335195347	-0.992964637873397
ITGB3BP	1	1	1.62077606388287	1.91018383443572
ITGB4	1	1	-0.39008753827854	-0.986665380594955
ITGB6	1	1	0.180608934843103	-0.915878904459701
ITGB8	1	1	0.0477237171764768	-0.674378765223251
ITIH5	1	1	-2.90539305738254	-1.65573872387193
ITPKA	1	1	-1.99098961881443	1.19407190621115
ITPKB	1	1	-0.870532208002051	-1.69614399730943
ITPR1	1	1	-2.02562182477756	-0.237480176089035
ITPR3	1	1	0.211284584486047	-1.17699803173326
ITPRIP	1	1	0.104250974142114	-3.00601114094041
JAG1	1	1	-2.2163500123386	-2.18129004299425
JAG2	1	1	-2.74327557615085	-2.30387224018358
JAK1	1	1	1.33439426788048	2.04256950557448
JAKMIP1	1	1	-1.80466979078098	-2.98022044956468
JAKMIP3	1	1	-0.00367563298984397	0.885590302350296
JAZF1	1	1	-1.62268751195713	-0.203582656977401
JPH2	1	1	-3.70474570325657	-0.773749244806991
JPH3	1	1	-2.36866705945774	0.847956644894852
JPH4	1	1	-2.38156216672703	-0.56016625225328
JSRP1	1	1	-4.03182976774021	-0.19377769291185
JUN	1	1	0.263632602178613	-3.15842403232835
JUNB	1	1	0.214335865461389	-3.1470366841533
JUND	1	1	0.240505761587182	-3.08111919224046
JUP	1	1	0.65079391666607	-0.999326122400985
KALRN	1	1	-0.294078045404395	-0.383208406565414
KANK3	1	1	-2.72951405576511	-2.5877653485515
KANK4	1	1	-1.95232933095737	-1.17062438785814
KCNAB1	1	1	-2.10567658475681	0.0145979994557042
KCNAB2	1	1	-1.48093359998508	-1.96706689655565
KCNB1	1	1	-2.95821660093113	-0.861089599726425
KCNB2	1	1	-2.70603507093235	0.633379446866288
KCNC4	1	1	-2.12732093862339	0.652379679085984
KCND3	1	1	-2.09771483472629	0.761819648148789
KCNH1	1	1	-2.10682337812229	-0.400129807589279
KCNH2	1	1	-2.7315825753574	0.698298322560563
KCNH4	1	1	-1.72555630735203	0.951495038869156
KCNH5	1	1	-3.0192531876926	-0.132189167139755
KCNH6	1	1	-2.40052836469456	0.828690933587326
KCNH7	1	1	-2.92328780225559	0.505229341389908
KCNIP1	1	1	-2.65694230130955	-0.139530075190292
KCNIP2	1	1	-2.15170829824253	-1.91543878376268
KCNIP3	1	1	-1.34403579763218	0.232352840306534
KCNIP4	1	1	-1.97984211972996	0.105945336224808
KCNJ10	1	1	-1.75896924070164	-0.196962965128646
KCNJ15	1	1	-1.01439636281772	-0.985574854014144
KCNJ5	1	1	-0.914760761774024	-2.67038358509325
KCNJ6	1	1	-2.68354886106296	0.520745503308548
KCNK1	1	1	0.141296095335046	-1.04018367588304
KCNK10	1	1	-0.717398577249488	0.236995565297379
KCNK13	1	1	-1.11153166822239	-2.67524732410692
KCNK17	1	1	-1.70011895231052	-0.758093011973129
KCNK2	1	1	-2.74740403226658	-0.427659643290268
KCNK3	1	1	-2.3082575135593	0.28416489303328
KCNK5	1	1	-0.0674783521060549	-0.343123686907516
KCNK6	1	1	0.00472313829616677	-0.325736296770797
KCNK7	1	1	-0.445835524118384	-0.371535313723312
KCNK9	1	1	-3.20141642621799	0.16830431163527
KCNMA1	1	1	-3.39634602597996	-0.67194546520494
KCNMB2	1	1	-2.85301154187961	0.351020919682755
KCNN1	1	1	-2.15367668203159	0.941323625447525
KCNN2	1	1	-0.885407381570777	-1.49480618297838
KCNN3	1	1	-2.11271732381626	-2.54624713718675
KCNN4	1	1	-0.996855431116065	-0.829223764536605
KCNQ1	1	1	-1.21851866773411	0.490359413029923
KCNQ2	1	1	-2.35076349309727	0.863745200040116
KCNQ4	1	1	-3.40258782438084	-0.435823810694442
KCNQ5	1	1	-2.32460897496982	-0.327633631823288
KCNS3	1	1	-0.878486090219458	-0.900715721247421
KCNT1	1	1	-3.82191079191013	-0.0240206843592983
KCNT2	1	1	-2.51931446126743	-0.667237413523422
KCP	1	1	-1.08143775991245	-0.141220462916122
KCTD1	1	1	-0.578349404848059	-0.855996025202499
KCTD14	1	1	-0.204826527154883	-0.086476696131454
KCTD15	1	1	0.316610044920007	0.387962686421647
KHDC1	1	1	-1.36618464521213	1.34596085787035
KHDRBS3	1	1	-2.31885021261021	-1.23727787792467
KIAA0232	1	1	1.70665544935421	-1.61844338238023
KIAA0319L	1	1	1.14866728254513	2.3794833296559
KIAA0895	1	1	-2.11944597295566	2.47913788497664
KIAA1217	1	1	0.382575339757959	-1.32466639339708
KIAA1257	1	1	-1.15301626256748	2.04785321891524
KIAA1324	1	1	-0.986464195764502	-0.606148374674545
KIAA1522	1	1	0.758143908464471	-0.85121907055162
KIAA1549	1	1	-0.92125266126438	-0.0687265521266323
KIAA1614	1	1	-1.41318314603611	0.485725271107926
KIF17	1	1	-1.33880417875095	1.89758347213484
KIF1A	1	1	-2.4577354722385	0.820059883000626
KIF1B	1	1	1.19102962979035	2.33915262162901
KIF21B	1	1	-1.61865537694736	-2.32675494015001
KIF25	1	1	-1.28819625905796	-0.944965494272934
KIF26A	1	1	-2.72921031049534	-2.47622550785326
KIF26B	1	1	-3.67105954221531	-1.84792650997423
KIF5C	1	1	-2.4321977429752	0.226674544217362
KIF6	1	1	-1.08032482198521	2.32591991365172
KIRREL3	1	1	-2.66051571897312	0.02062832057692
KISS1R	1	1	0.384325689756433	1.65097180992581
KITLG	1	1	-0.996669941461524	-1.44800771534227
KLF10	1	1	0.0993847317333616	-3.01425184070848
KLF3	1	1	1.41728404455737	-1.26901496708177
KLF5	1	1	0.435709542715112	-1.04858483135484
KLF6	1	1	0.218123144590417	-3.11707223713182
KLF9	1	1	0.0604590839977659	-2.65570987522386
KLHDC8A	1	1	-2.3611151509647	-1.62632407009386
KLHL13	1	1	-1.66380398801609	-0.5002352124431
KLHL21	1	1	1.21295415528969	2.38087485969283
KLHL29	1	1	-1.50073879293247	-0.635888469813095
KLHL3	1	1	-1.18147461942478	0.00391040981031843
KLRG2	1	1	-0.651729994333228	-0.674789322016464
KMO	1	1	-0.762212687051734	0.317213284375443
KNDC1	1	1	-1.22716992429539	2.07495273888327
KREMEN2	1	1	-1.42396634153171	1.07799060881354
KRT15	1	1	-0.336030178583106	-0.92607749759935
KRT18	1	1	0.522210366212884	-0.723307741282211
KRT19	1	1	0.388154334508935	-0.792542350886093
KRT7	1	1	0.0894997782345213	-0.807457817194686
KRT8	1	1	0.50910086103634	-0.791796815989242
KRT80	1	1	0.0510632462139524	-0.839749229548202
KRT86	1	1	0.00973147817806375	-1.05838240444444
KSR1	1	1	-0.720777922189673	0.526472436787857
KSR2	1	1	-2.17436616948887	0.525648939015641
KYNU	1	1	-0.451803379571875	0.00489472091413923
L1CAM	1	1	-1.72398274472996	-0.382845414278732
L3MBTL4	1	1	-1.39164774946018	-1.06409658252977
LAD1	1	1	0.663609153711358	-0.96271957218431
LAMA2	1	1	-3.13844960264011	-1.37303365528368
LAMA3	1	1	-0.409483366525611	-0.924944532511459
LAMA5	1	1	0.735837525808374	1.7851591879151
LAMB1	1	1	-2.72435610822483	-1.76355136692308
LAMB4	1	1	-1.17599099210544	-0.497405899164901
LAMC1	1	1	-3.03664057782932	-2.26779664814256
LAMC2	1	1	0.127533382856408	-0.981469524500595
LAMC3	1	1	-2.38754003576084	-1.17990959942125
LANCL2	1	1	-2.22069280675693	2.58049462974287
LATS2	1	1	0.166858024084131	-1.97375501453661
LBH	1	1	-2.44794958165928	-2.38823450863145
LCP1	1	1	-1.18112462095066	-2.89067376911424
LCP2	1	1	-1.26722686818882	-2.89065851032518
LDB3	1	1	-3.80563157132908	-0.440859926340805
LDHB	1	1	-0.265130692041358	-0.834238899348007
LDLRAP1	1	1	1.02042875357823	1.8500678414128
LEF1	1	1	-2.2440063290958	-0.749826801417099
LEFTY1	1	1	-1.35606210759922	0.769303547742142
LEMD1	1	1	-0.602689915216406	-1.12142742931627
LEPR	1	1	-2.47401040128513	-0.987506521342025
LETM1	1	1	1.68581605621533	-1.55865014850877
LFNG	1	1	-1.3388594918613	-0.221741927263961
LGALS3	1	1	-0.246849828279456	-1.9246691590526
LGI1	1	1	-2.9927057557468	0.214941965939774
LGI3	1	1	-1.44130700162693	-0.630503309366928
LGI4	1	1	-2.66635554364963	-2.07992852985643
LGR5	1	1	-1.38154953054233	-1.15531553089403
LGR6	1	1	-0.932288342035254	-1.0480855828502
LHFPL2	1	1	-1.17942135862156	-2.4809800511577
LHFPL3	1	1	-2.7200531297092	0.332005011441483
LHX1	1	1	-1.64738576940342	-0.407553566096054
LHX2	1	1	-1.87116330198093	0.717292117478623
LIFR	1	1	-1.96239440969272	-1.18109477817796
LIMCH1	1	1	-3.99065917066379	-0.192759049532638
LIMS2	1	1	-3.66340725950046	-1.06413997471117
LIN28A	1	1	-1.38565843633457	0.218156444432511
LINGO1	1	1	-2.32667129567905	-1.83654488384508
LINGO2	1	1	-2.92501013807102	-0.252886784670578
LIPA	1	1	-0.853106909311255	-2.5974294072368
LIPC	1	1	-0.592853479898413	0.479853379132523
LIPE	1	1	-2.1293253236179	-1.87790120899461
LIPH	1	1	0.455401963674585	-0.640054596064315
LIX1L	1	1	-0.314450912988623	1.24564446747519
LLGL2	1	1	0.804866141759912	-0.814407957194076
LMAN1L	1	1	-1.59607213071628	-0.20991469681047
LMCD1	1	1	-3.03412621549412	-1.58346737682603
LMO1	1	1	-2.22020142606541	-0.0165617591121059
LMO4	1	1	-0.730022364175757	-0.217873705027328
LMO7	1	1	0.365341371976892	-1.21430696308397
LMOD1	1	1	-3.68783371976658	-1.03658880054735
LMTK3	1	1	-1.71991365484043	1.06828366458632
LMX1A	1	1	-2.16872804693027	-1.78022564708971
LMX1B	1	1	-1.45312827161594	-0.597013843653427
LNX1	1	1	0.933501071416894	-1.30805863201402
LNX2	1	1	0.848749703847925	-2.2655054455974
LONRF2	1	1	-1.92295949987217	0.404684411885514
LOXHD1	1	1	-2.79728310636326	-2.52714122593187
LOXL1	1	1	-3.65126126340671	-1.86709798633836
LOXL2	1	1	-3.28135197690769	-2.24124444782518
LOXL3	1	1	-2.56844561628147	-1.44692934810899
LOXL4	1	1	-1.12522929242893	0.0538556450626988
LPAR5	1	1	-0.914339952981909	-2.19584478199266
LPCAT1	1	1	-1.0477492146854	-1.40000761806749
LPIN1	1	1	-0.747439079797705	-1.38126100361131
LPIN2	1	1	-0.501534514940222	0.716888832452073
LRBA	1	1	1.61576216586784	-1.30464233219408
LRCH1	1	1	0.694204694711725	-2.17551244556688
LRFN2	1	1	-2.24611037305637	0.22836004436232
LRFN5	1	1	-2.98486226133152	-0.485929144022689
LRIG1	1	1	-1.30654066137119	-0.698120010493026
LRP1	1	1	-3.44257062009617	-1.42081607639574
LRP11	1	1	-3.53156035474583	2.68502043426253
LRP1B	1	1	-2.66860478452488	-0.323517692682968
LRP2	1	1	-1.27048867276951	0.443675386311783
LRP8	1	1	0.017659611188928	0.870594012143387
LRRC1	1	1	0.565270668947259	-1.0768622285106
LRRC10B	1	1	-1.09598463109775	2.24314175784804
LRRC23	1	1	-1.07451956800266	2.30281196773268
LRRC26	1	1	-0.972912006891211	-0.430807245371566
LRRC49	1	1	-1.05823176435276	2.20033918559767
LRRC4B	1	1	-2.3061458402042	0.552000033261551
LRRC4C	1	1	-2.89232342771335	-0.699574125406967
LRRC8D	1	1	1.42946221412079	2.00588862836577
LRRN2	1	1	-2.01059454015537	0.399247156979813
LRRTM4	1	1	-3.09304421476169	-0.0274651175715785
LRTM2	1	1	-2.91178076795383	0.331337797047867
LSAMP	1	1	-2.82250111631199	-1.30679477512621
LSP1	1	1	-1.32276433042332	-2.8860994702556
LSR	1	1	0.742003805124322	-0.943365228770004
LTBP1	1	1	-3.4790920548801	-1.18691409885667
LTBP2	1	1	-3.28340857557102	-1.66209520160936
LTBP4	1	1	-2.96628134778782	-0.996889246103988
LTF	1	1	-1.03571813634678	-1.82651842891954
LUZP1	1	1	1.17991243966774	2.30418460309721
LUZP2	1	1	-2.49877708486362	-0.692946565745101
LYN	1	1	-1.17203610471531	-2.84267724811815
LYNX1	1	1	0.459856039964715	0.961324679257645
LYPD6	1	1	-0.922481947458228	-0.549183738825546
LYPD6B	1	1	-0.717568331277808	-0.461853635905014
LYRM2	1	1	-3.49583619169041	2.67830096423842
LZTS1	1	1	-3.13345664075657	-2.04382027447008
MACC1	1	1	0.20184452005581	-0.78679527103685
MACROD2	1	1	-2.7051400475864	-0.248033774492965
MAD1L1	1	1	-2.23431509069248	2.58521424472548
MADCAM1	1	1	-2.03936927846714	-2.24739064037584
MAEA	1	1	1.64486869343475	-1.60880078136705
MAF	1	1	-1.06138580373569	0.346582996251358
MAFA	1	1	-4.06094782880588	-0.0467590218760829
MAFG	1	1	0.070447868787805	0.942599164845719
MAFK	1	1	-2.19333212903782	2.52966861665465
MAGI2	1	1	-2.14879077009006	1.56046617083467
MAGI3	1	1	1.41954694607214	1.65971781552054
MAGIX	1	1	1.21515739628033	1.0041684979222
MAL	1	1	-0.741795712030371	-1.02765024959825
MAL2	1	1	0.681377179109613	-1.000161064265
MAMDC2	1	1	-3.52267449430271	-0.52960361301683
MAML3	1	1	1.63850543566898	-1.01239718258165
MAMLD1	1	1	-1.29975455335422	-0.1193039542415
MAN1C1	1	1	-0.791347198999365	-1.80196918308519
MANBA	1	1	1.55203612812714	-1.33546484768175
MAP1B	1	1	-0.78878777555271	1.06571446597792
MAP1LC3A	1	1	-1.07488554052158	1.21960725128867
MAP2	1	1	-0.0869021945361697	0.825753437878861
MAP3K1	1	1	0.842812604391137	0.448924528958573
MAP3K12	1	1	-1.33617823652073	1.6034426657132
MAP3K15	1	1	-0.836923532998999	0.545317875745072
MAP3K5	1	1	-3.40759461454197	2.58771370589949
MAP3K9	1	1	1.172000310504	-0.751790655253158
MAP6	1	1	-1.0570802026157	1.89391507446982
MAP7D1	1	1	1.09877828427509	2.2820135825894
MAPK10	1	1	-1.97957103780552	-2.23751200496934
MAPK11	1	1	-2.31789773038669	1.1417493397019
MAPK12	1	1	-2.2529219918613	1.11767883837439
MAPK4	1	1	-1.73946159414097	-0.8310457593181
MAPK8IP1	1	1	-2.44021885923191	1.04433499515273
MAPRE2	1	1	-1.81468742421909	-1.56660164654039
MAPRE3	1	1	-0.822412186181983	1.88561536610342
MAPT	1	1	-2.42229311994358	0.410428153874649
MARK1	1	1	-2.07772296003147	-0.037528885004745
MAST1	1	1	-2.231135302103	1.08741034805991
MAST2	1	1	1.89225388237194	1.77770090341784
MATN2	1	1	-1.73927252820774	-0.326618326304184
MATN3	1	1	-3.33324187330051	-1.66176022350572
MB	1	1	-4.08227007917209	-0.125095856783615
MBNL2	1	1	0.81796795793728	-2.25846399128221
MBOAT1	1	1	-0.172347598588904	-1.05473173916124
MBOAT2	1	1	0.31688517996029	-0.183601749537216
MBP	1	1	-1.56114976934238	0.315191494824662
MCAM	1	1	-3.04936831525608	-2.3259712582805
MCC	1	1	-0.487931900537451	-0.250233781931625
MCF2L	1	1	0.686068839513818	-2.13852132618211
MCF2L2	1	1	-0.551606350458106	1.91543267905928
MCM4	1	1	2.2787586516972	1.38076170027472
MCM9	1	1	-3.47686617902561	2.70208357513167
MCTP1	1	1	-2.71088021329685	-1.4089163666942
MDFI	1	1	-0.409647040880164	-0.449324739573226
MDGA1	1	1	0.0500443644161619	0.794495629670395
MDGA2	1	1	-3.08648055127903	-0.0855536586024623
MDN1	1	1	-3.52005951932712	2.66570411861159
MDS2	1	1	-1.94956296018406	-2.2438544160106
ME3	1	1	-0.123496466196021	-1.41434778034471
MECOM	1	1	-1.99170392087742	-0.990143669245468
MECP2	1	1	1.3325479618545	0.934383975865616
MEF2C	1	1	-3.95713751844211	-0.244823349116073
MEGF11	1	1	-2.64200156263157	0.163337575795426
MEGF6	1	1	-2.61945336393162	-1.45713747799181
MEI1	1	1	-1.87274592450901	-2.82622731983446
MEIS1	1	1	-1.85870712331577	-0.870758665201889
MEIS2	1	1	-2.09433715871616	-0.783110988733993
MERTK	1	1	-1.19804709485813	-2.66046346485399
MESP2	1	1	-1.32441275647922	1.09004108846404
MET	1	1	0.235003060781518	-1.43957794964098
METRNL	1	1	-0.656720095193823	-2.63287366688036
MFAP2	1	1	-3.5542725854282	-1.80549634754442
MFGE8	1	1	-2.42651718190952	-1.22476853191637
MFSD10	1	1	1.67260301777081	-1.64710010349535
MFSD2A	1	1	-1.16887324384495	-0.374186409113632
MGAT3	1	1	-0.649574928796729	-0.175477040407882
MGAT4A	1	1	-1.08959858945652	-2.40661205112718
MGAT4C	1	1	-2.48458712629124	-0.217551363108383
MGAT5B	1	1	-2.21790164045139	0.859198915364518
MGLL	1	1	-0.175961189783057	-0.539452207682357
MGST2	1	1	1.49830202677206	-1.11816133320116
MIA2	1	1	-0.544956975496253	0.652372109296097
MIB1	1	1	0.954131431066553	0.45523844897963
MICALL2	1	1	-2.12050693563267	2.45077054441191
MID1	1	1	0.193106598341028	0.155094730260148
MIDN	1	1	0.26395184465603	-3.09673084080003
MIER1	1	1	1.51238585182385	1.86594753205992
MIPEP	1	1	0.790543264829675	-2.1047798520305
MIPOL1	1	1	-1.74028318456455	0.663463222386612
MITF	1	1	-1.26180713704868	-1.5556231862285
MLLT11	1	1	-0.644575529611548	1.66494776547171
MLPH	1	1	-0.216154509103736	-1.0524345761516
MLXIPL	1	1	-0.975356751001319	-0.242985857126937
MMEL1	1	1	-1.40070550969883	0.741131650807633
MMP11	1	1	-3.59791224530979	-1.82627166569017
MMP16	1	1	-2.81941979459568	-1.45936693012498
MMP17	1	1	-1.86531560949131	0.54617820918776
MMP2	1	1	-3.54849713376804	-1.78097666561388
MMP28	1	1	-0.259992056405982	-0.973327053187118
MMRN2	1	1	-2.71113007596775	-2.39660252392076
MNX1	1	1	-2.05842226079746	0.906154143216385
MOCOS	1	1	0.302551812612573	0.0263328427097935
MORC4	1	1	1.21000126668171	1.03044228494383
MORN1	1	1	-0.804076128519019	2.52685670793272
MPP7	1	1	0.705524272405664	-0.983802688715683
MPPED2	1	1	-1.84197919896885	-0.727558506129013
MRAS	1	1	-0.91171520284458	-1.9709690934398
MRC2	1	1	-3.37748425535007	-1.65002192318224
MRVI1	1	1	-3.69350665143772	-1.06015218555711
MSH2	1	1	2.03923756548123	1.01993762195326
MSH6	1	1	1.61551798053936	1.01074867189146
MSLN	1	1	-0.178847246683081	-0.359776032564865
MSN	1	1	-0.407033973253211	-1.94226230442308
MST1R	1	1	0.101286000692407	-0.931739223597274
MSX1	1	1	-1.8621875577335	-1.09435643017076
MSX2	1	1	-0.617337637460669	-1.15657962620042
MTHFD1L	1	1	-3.50828354886814	2.66191445529677
MTHFD2L	1	1	1.63874071010307	-1.28356565296434
MTHFR	1	1	1.24209468730644	2.2970750802777
MTMR12	1	1	1.74119684764103	1.11039488256194
MTOR	1	1	1.17821857997135	2.33693365991332
MTRR	1	1	1.7562055952187	1.14889379084326
MTUS2	1	1	-2.18283813527866	0.356432306172623
MUC1	1	1	0.180641359769861	-0.693010938761459
MUC4	1	1	-0.0750308566455447	-0.442045343516098
MUC5B	1	1	-0.14138787320896	-0.502558124659286
MUSK	1	1	-3.9882702165012	-0.184751761553512
MXD1	1	1	0.952815420114557	-0.738684309122787
MXD3	1	1	2.4817906088467	1.99253411829688
MXRA8	1	1	-3.46540968946262	-1.64942063152574
MYADM	1	1	0.0731853909130491	-3.11193813144945
MYB	1	1	-0.916357927835425	-0.625082147715316
MYBL2	1	1	2.431875295126	1.63289137423254
MYBPC2	1	1	-4.07868855527683	-0.0999599820353847
MYCBPAP	1	1	-1.0878464513187	2.22250657022215
MYCN	1	1	-1.98835723928257	-1.80255879223131
MYEOV	1	1	-0.121501260316809	-0.735919130442367
MYH11	1	1	-3.68580763868137	-0.98600591480516
MYH14	1	1	0.661464936220209	-0.706185711024032
MYH15	1	1	-3.20069544843479	-0.272970569727645
MYL10	1	1	-3.50007241300388	-0.241418135760055
MYL3	1	1	-4.03853266767307	-0.142265332339035
MYLK	1	1	-3.69781058362766	-1.01787866413377
MYLK3	1	1	-4.09300034574314	-0.131421340105758
MYLK4	1	1	-2.91339390806003	2.34927962959029
MYLPF	1	1	-4.07129805616184	-0.107036960718856
MYO10	1	1	0.697163111650506	-0.61149419605516
MYO16	1	1	-2.73692124418064	-0.0528830414988857
MYO18B	1	1	-4.09150832227512	-0.119268072245346
MYO19	1	1	2.46664292284207	1.59650906972803
MYO1B	1	1	-2.51653163961216	-2.31749881565355
MYO1D	1	1	0.776651091062585	-0.793236864207016
MYO3A	1	1	-1.78418272069736	0.785906779172196
MYO3B	1	1	-1.47203581861301	-0.386480939982162
MYO5B	1	1	0.599053866350213	-0.862400663492904
MYO5C	1	1	0.704765684091607	-0.521392477152572
MYO6	1	1	-3.45514958432957	2.66622458636977
MYO7A	1	1	-1.2675248914127	-2.85834659397386
MYO7B	1	1	-0.651760750329932	0.685360478760972
MYOD1	1	1	-4.0297741227512	-0.0901824361064296
MYOM1	1	1	-3.97251885465427	-0.232183468935714
MYRIP	1	1	-2.09585445455356	-1.2771476632335
MYT1	1	1	-2.49772589734836	0.733401524426712
MYT1L	1	1	-2.95923178724094	0.534887062909378
NAA10	1	1	1.28809392371134	1.0450596684239
NAALADL2	1	1	-1.74925153783604	2.09581117570616
NAB2	1	1	0.8838035530682	-0.0954163199641567
NADK	1	1	1.09088460274891	2.4285835498593
NANOS3	1	1	-1.90953248075291	1.21580322325446
NAV1	1	1	-2.25967257550999	-1.35228384792589
NAV2	1	1	-0.822099381006201	-0.295419824717269
NAV3	1	1	-2.83431428006931	-0.953786028025375
NBEA	1	1	-2.35302179387852	-0.266061318514572
NCALD	1	1	-1.44089525274082	-0.311806452868209
NCAM1	1	1	-3.16117947629734	-0.359240067599044
NCAM2	1	1	-2.98375599912449	-0.895948064921127
NCKAP5	1	1	-1.77646010450168	-0.722830665705429
NCOA7	1	1	0.195774979078332	-3.0618111020305
NDRG1	1	1	0.288245744192163	1.61608730495192
NDRG2	1	1	-0.0810840659503542	-0.283197415468917
NDRG4	1	1	-1.04609315923496	1.09659005940176
NEBL	1	1	-0.0311924748782717	-0.758433473704086
NECAB1	1	1	-1.93492072156711	-0.560743940470443
NEDD4L	1	1	0.80213189789013	0.260245072247757
NEDD9	1	1	0.222653574430505	-2.80987418949388
NEK10	1	1	-1.08090608648105	2.19998614728667
NEK11	1	1	-0.909701281106909	2.39106546581007
NELL1	1	1	-1.85974185994907	-0.293289673922287
NES	1	1	-2.91424220136448	-0.688546312449203
NEURL1B	1	1	2.29769737192349	1.80253462732054
NFAM1	1	1	-1.11840575269504	-2.84500230610155
NFASC	1	1	-2.84435313276096	0.0835994356892247
NFATC1	1	1	-1.49483244947239	-0.390541089174972
NFATC4	1	1	-1.35886209539219	1.49576863140084
NFIA	1	1	-0.616798096216162	-1.18914378940843
NFKB1	1	1	1.51724161871628	-1.35068143665575
NFKB2	1	1	-0.405617528474768	-2.41816700756334
NFKBIZ	1	1	0.133174962484399	-3.04299129307054
NFYC	1	1	1.30622838356451	2.26401810586668
NGEF	1	1	-0.781067543542822	-0.0258761769511562
NGFR	1	1	-2.17808764509006	-0.952420843241439
NHS	1	1	-0.695835285699805	-0.529729021189437
NHSL1	1	1	-3.51408379606052	2.64559780299879
NID1	1	1	-3.08119099668308	-2.19816173374437
NINJ2	1	1	-1.31957905820652	0.27303253352858
NINL	1	1	-1.13361876539036	1.16145889699675
NIPAL3	1	1	1.05016732879833	1.629781304451
NIPBL	1	1	1.74639693566517	1.01487879693724
NKAIN1	1	1	-2.40308039716526	0.461105572583451
NKAIN2	1	1	-2.73079245618626	-0.1567213660457
NKAIN3	1	1	-2.86012976697727	0.470866071584
NKAIN4	1	1	-1.56728427938267	0.0173110836765904
NKD1	1	1	-1.13776939443394	-1.20344699680589
NKD2	1	1	-2.66011040738865	-1.49950255214952
NKX2-5	1	1	-1.88203161290928	-0.208913577196823
NLGN1	1	1	-2.73529665998264	-0.338037145731674
NME7	1	1	-0.849248819864234	2.10185770929076
NMNAT2	1	1	-2.30084794095798	-1.34322894871019
NNMT	1	1	-0.714465075052222	-2.06493533909105
NOC2L	1	1	1.20489825972275	2.32783089816786
NOD1	1	1	-3.1268142991428	0.0712731951496739
NOS1	1	1	-1.77462833455845	-0.0577640658595424
NOS3	1	1	-2.77272360853001	-2.50242055713914
NOTCH2	1	1	1.49173591204838	1.78627385437705
NOTCH3	1	1	-2.84128897718235	-2.57866014301561
NOVA2	1	1	-2.80697386792942	-2.54533923923753
NOX5	1	1	-1.59974997571751	-0.729684484598861
NPAS2	1	1	-0.605795317209204	-1.6281010037639
NPAS3	1	1	-2.12994163564487	-0.718633306620346
NPC1L1	1	1	-0.798053675210913	0.612884032132401
NPDC1	1	1	-2.04332821897312	1.05346046626784
NPHP4	1	1	1.04700321623043	2.38133912027098
NPNT	1	1	1.43229495466606	-0.589670312998519
NPSR1	1	1	-0.562996678865393	0.29921661555983
NPW	1	1	-1.04776995710178	1.06349615991332
NR0B2	1	1	-0.698180609262427	0.620540844800248
NR1H3	1	1	-1.30081980756565	-2.89121068775438
NR2F1	1	1	-2.00106781057163	-0.679090870020614
NR2F2	1	1	-1.7775072389011	-1.03421486675523
NR3C1	1	1	-0.365951114213904	-1.91065706074022
NR3C2	1	1	-0.164405160463294	-0.904693258402572
NR4A1	1	1	0.208828873121301	-3.12401212513231
NR4A2	1	1	0.212611979925195	-3.12710059940599
NR4A3	1	1	0.19424182840542	-3.12437595188402
NR5A1	1	1	-1.30963056615635	0.888692247273697
NR5A2	1	1	-2.80456202558323	-2.56363405048631
NRARP	1	1	-2.22714798978611	-2.32267011463426
NRCAM	1	1	-2.19993084005161	-0.32574607193254
NRG1	1	1	-2.02376621297642	-0.310969961283432
NRG2	1	1	-1.48035328916355	-0.902184856531845
NRG3	1	1	-1.52510970166965	0.492874729039444
NRGN	1	1	-2.94616311124607	-1.30623282253526
NRM	1	1	2.30029732652859	1.61409250512935
NRN1	1	1	-2.72520964673801	-0.234229457972274
NRP1	1	1	-2.81174796155735	-2.60469831287645
NRP2	1	1	-2.53078311017795	-1.59499634563707
NRSN2	1	1	-1.25433724454685	1.04376529395796
NRXN1	1	1	-2.79598277143284	0.256164895894303
NRXN2	1	1	-2.19221990636631	-0.931528223154769
NRXN3	1	1	-2.53432696393772	-0.559193981287704
NT5E	1	1	-1.70898883870884	-1.04270757496141
NTM	1	1	-3.50085013440891	-1.73667491733812
NTN1	1	1	-1.48782318166538	-0.788644207117782
NTN3	1	1	-1.5247246556644	1.1528831595204
NTN4	1	1	-0.500621729410132	-0.79406369983934
NTNG1	1	1	-2.69440024427219	-0.170798314211593
NTNG2	1	1	-3.11013405851169	-1.07256234943651
NTRK1	1	1	-1.71610396436497	-0.112798226473556
NTRK2	1	1	-2.1226376824741	-0.285555017588363
NTRK3	1	1	-2.7712029748325	-0.560578716395126
NTSR1	1	1	-1.54806678823276	0.282614576222672
NUAK1	1	1	-3.56174653104587	-1.9483348256328
NUAK2	1	1	-1.35781090787693	-1.16409052669786
NUDC	1	1	1.107496804678	2.26240490615584
NUDCD3	1	1	-2.20731704763218	2.53767125547148
NUP210	1	1	2.37301606603817	1.66331540286757
NXNL2	1	1	-1.60533421567722	-0.987530363199935
NXPH1	1	1	-3.00120537809177	0.240111815335526
NXPH4	1	1	0.241899318182031	1.5900398367665
NYX	1	1	-0.871794872796973	0.381265627743973
OAF	1	1	-2.56065028241917	-2.11093725025438
OBSCN	1	1	-4.08049529126926	-0.073424471018539
OCA2	1	1	-1.73030894330784	-1.32177819072984
OCLN	1	1	0.787927455389062	-0.649084461329208
OGDH	1	1	-2.17294829419895	2.56913511693694
OLFM1	1	1	-2.11651533178135	0.535747634770646
OLFM2	1	1	-2.17549722722813	0.712794350983872
OLFML2A	1	1	-2.75686924985691	-2.26897968113206
OLFML2B	1	1	-3.54799216321751	-1.92124379932664
OLFML3	1	1	-2.7834133439426	-1.72770680248521
ONECUT1	1	1	-0.802840405023535	0.631516980530991
ONECUT2	1	1	-0.807314568078955	0.583348380925431
ONECUT3	1	1	-0.619729214227637	0.400113927724137
OPCML	1	1	-2.86767094663425	-0.845486057398544
OPRD1	1	1	-2.4141928487186	0.171146022679581
OPRL1	1	1	-2.24680631688877	1.20408536732413
OSBPL1A	1	1	0.76196551986889	0.174156772496476
OSBPL3	1	1	-2.1759230428104	2.17494289815642
OSBPL6	1	1	-1.66245906881138	0.0412317389271397
OSBPL9	1	1	1.22634769149975	2.28085027873732
OSGIN1	1	1	0.0340127415295042	0.891594397427811
OSTM1	1	1	-3.52030365995212	2.67566918075301
OTUD5	1	1	1.16008642979817	1.04339717567183
OTUD7A	1	1	-2.84010832837864	0.96878813445784
OVOL1	1	1	0.658747798883478	-0.987380397913681
OVOL2	1	1	0.599115378343622	-0.935939682123886
P2RX1	1	1	-1.94831984571262	-2.55155195057176
P2RX5	1	1	-1.98473089269443	-2.59501804172777
P2RX6	1	1	-4.02561562589451	-0.160243642924057
P2RX7	1	1	-1.4711677365665	-2.29145373165391
P2RY2	1	1	0.268102950536767	-1.15125168621324
P2RY6	1	1	-1.09067481092258	-2.51211751758836
PACRG	1	1	-1.1277200513248	2.17528961837508
PACSIN1	1	1	-2.41485875181003	0.00886093318678327
PADI1	1	1	-0.235427670991858	-0.734548223612533
PADI2	1	1	-1.45601027540012	-0.728854072687851
PADI3	1	1	-0.397933893716773	-0.677703035471664
PADI4	1	1	-0.970913343942603	-2.21886266529344
PAG1	1	1	-1.79763453534885	-1.40089000522874
PALLD	1	1	-3.65929549268528	-1.01153029262804
PALM	1	1	-2.10161440900608	0.695927309396042
PALMD	1	1	-2.60666888288303	-2.09307206928514
PAPLN	1	1	-1.66244452527805	-1.71359599888109
PAPPA	1	1	-2.75688403180881	-1.28654159366869
PAPPA2	1	1	-2.41536586812778	0.165805565716996
PAPSS2	1	1	-1.75436943105503	-1.14108694851183
PAQR5	1	1	-0.344827824151953	0.479080545308365
PAQR8	1	1	-1.78033607534214	-1.09812010586046
PARD6B	1	1	0.78463876911358	-0.697589052317367
PARD6G	1	1	0.645909137212793	0.133643257024064
PARK7	1	1	1.2197337962027	2.25447772681929
PAWR	1	1	0.851036078416864	-0.909629238245712
PAX2	1	1	-1.80385797551914	-0.608047378657089
PAX3	1	1	-2.58619158796116	-0.357130778429733
PAX5	1	1	-1.94163482717319	-2.55963577091478
PAX6	1	1	-2.52803986600681	0.826727735402359
PAX7	1	1	-3.67031710675999	-0.0250464802958827
PAX8	1	1	-1.78872769407078	-0.803741348383651
PAX9	1	1	-0.660537176645239	-0.329475176928268
PBX1	1	1	-0.783428602731665	-0.309649599192367
PBX3	1	1	-0.726109676874121	-2.65596355259203
PBX4	1	1	-1.79766099981113	-2.20770992100023
PC	1	1	-0.5629098945026	0.37175570667006
PCBP3	1	1	-2.34573286107822	0.0254655951283116
PCCA	1	1	0.787873453580896	-2.18028582393907
PCDH1	1	1	0.8844618267651	-0.347133172152267
PCDH12	1	1	-2.8212403588657	-2.57681049167894
PCDH15	1	1	-2.84875147870823	-0.10873700439714
PCDH7	1	1	-2.76187937787815	-1.10947073757433
PCDH9	1	1	-2.91137736371799	-0.262814057467208
PCGF3	1	1	1.68407673307614	-1.56266058742784
PCID2	1	1	0.777863330328027	-2.2415305501201
PCK2	1	1	0.0160234636898435	0.0821337574741978
PCSK2	1	1	-2.57209866575046	0.36997770011641
PCSK5	1	1	-3.07412474683567	-1.13924230396532
PCSK6	1	1	-2.37697308591648	0.169184791447892
PCYT1B	1	1	-0.915913038766822	1.16356872260786
PDCD6	1	1	1.76196808286862	1.14036251843192
PDE10A	1	1	-1.83239858678623	-0.933136833307968
PDE11A	1	1	-2.61837380460544	-0.218951118586288
PDE1C	1	1	-3.0485877328281	-1.18764127552293
PDE2A	1	1	-2.59340708783909	-2.43425573169969
PDE3A	1	1	-3.48227923444553	-1.25863684475206
PDE4A	1	1	-1.78145545057102	1.09016792714812
PDE4B	1	1	-1.07080786756321	-2.02987135708116
PDE4C	1	1	-0.0100203090076052	-0.220790756342636
PDE4D	1	1	-1.45424955419346	-1.47913111507677
PDE6A	1	1	-0.966718130624732	0.0118086212895054
PDE6B	1	1	-1.37085812619968	0.828365969064011
PDE7B	1	1	-2.64470809034153	-2.22635639965318
PDE8B	1	1	-2.26928322843357	-0.0910328751780849
PDE9A	1	1	-1.79255049756809	0.667703735234513
PDGFA	1	1	-2.20489066175266	2.45381687820174
PDGFB	1	1	-2.82008212140842	-2.60688508808397
PDGFC	1	1	-2.31667750409885	-0.983895671961532
PDGFRA	1	1	-3.22103446058079	-1.41806496441148
PDGFRB	1	1	-3.47667067579075	-1.96952499210619
PDGFRL	1	1	-3.46488946012302	-1.48759378254198
PDLIM1	1	1	0.239969915830652	-1.2192875272014
PDLIM4	1	1	-2.37198703817173	-1.0787309533336
PDLIM5	1	1	1.27244836755947	-0.912202251551376
PDSS2	1	1	-3.4744386010532	2.65096591651656
PDZD2	1	1	-1.39668934873386	-1.06552017986558
PDZRN3	1	1	-3.49388115934177	-1.60087121784471
PDZRN4	1	1	-3.67756407789036	-0.920761001703964
PEAR1	1	1	-2.62227576307102	-2.44566263019823
PEBP4	1	1	-1.52540796331211	-0.907978428004013
PECAM1	1	1	-2.75765412381931	-2.5683618909099
PELI2	1	1	-1.94474070600315	-0.973637474177108
PEPD	1	1	-0.332312517679175	0.261983620526566
PER1	1	1	0.0865512556667722	-2.69996084034227
PEX14	1	1	1.15468770929531	2.30232940852858
PEX5L	1	1	-1.79316847852512	0.34565125644423
PFKFB2	1	1	0.436399526083032	0.0591561669132847
PFKFB3	1	1	0.396593636953393	1.68185559898831
PFKFB4	1	1	0.368440217458764	1.67000705242373
PFKP	1	1	0.415688998186151	1.6737059974692
PGBD5	1	1	-1.94169371656223	0.451875316502823
PGM1	1	1	0.313391274892846	1.40271368861414
PGPEP1	1	1	0.424326724493066	-2.4468528157451
PGR	1	1	-1.84444444707676	-0.990649355051742
PHACTR1	1	1	-1.4666683011417	-1.45140470325731
PHACTR2	1	1	-3.47977011731907	2.61547909915663
PHACTR3	1	1	-1.63520138791843	0.165085064770951
PHC2	1	1	1.38575671904639	2.23706297815062
PHEX	1	1	-0.103723698175391	0.729873763921036
PHF19	1	1	2.22843415209011	1.55694158427633
PHF21B	1	1	-2.38989847234531	0.927670823933854
PHGDH	1	1	-0.622035913980445	-0.0716402655818325
PHKA2	1	1	0.997477001630823	1.21166567743041
PHLDA3	1	1	0.0830833382244505	-2.21223582088731
PHLDB1	1	1	-3.34074776700779	-1.66962565243028
PHLDB2	1	1	-0.586635642564734	-1.07954348385118
PHLPP1	1	1	0.806905097448388	0.288792478444352
PI4K2B	1	1	1.63957015343861	-1.54914487659715
PIBF1	1	1	0.803129143201867	-2.26840080082201
PID1	1	1	-2.78346341184421	-0.95384825527452
PIK3AP1	1	1	-1.23361795476719	-2.77670491993211
PIK3C2B	1	1	-0.283684068239173	-0.638399494288192
PIK3C2G	1	1	-0.667082243478736	0.279145347478165
PIK3CD	1	1	-1.60100596479221	-2.83123458683275
PIK3R1	1	1	-0.454707437074622	0.00369857490278669
PIK3R3	1	1	-2.51893895200535	-2.36320556461595
PIM3	1	1	0.150385803663293	-3.03268112003587
PIN4	1	1	1.25476614304737	1.0472164624951
PIP4K2A	1	1	-1.67604916623875	0.318484293820633
PIP5K1B	1	1	-0.646603994882544	-0.528186691401229
PIP5KL1	1	1	-1.60727756551548	0.889983939530625
PIPOX	1	1	-0.723828487909278	0.27149068057753
PITPNC1	1	1	-0.556887441194495	-1.34248651325487
PITX1	1	1	-0.222546511209448	-0.674753320811019
PITX2	1	1	-2.75306838086887	-0.379602921602951
PIWIL4	1	1	-0.952471428430518	0.788895356061234
PKD1L1	1	1	-2.55435841611668	-2.17457593738817
PKD1L2	1	1	-0.0144559674625002	0.847791182400956
PKD2	1	1	-1.32728784612461	-1.54513396084093
PKHD1	1	1	-0.56037312082096	0.605872380139603
PKIB	1	1	-2.37948720983311	-0.219504607317672
PKIG	1	1	-1.56590455106541	-1.66191591083787
PKMYT1	1	1	2.42166597315029	1.64560528338171
PKNOX2	1	1	-3.19174902967258	-0.691666257975326
PKP1	1	1	-0.424050503290137	-0.856540573237167
PLA2G4C	1	1	-0.379541450059851	-2.34268893062852
PLA2G4E	1	1	-0.566063695466956	-0.242203844187484
PLAC1	1	1	-3.04773085645481	0.21353934943892
PLAGL1	1	1	-3.34366076520725	2.44066380202986
PLB1	1	1	-1.11114495328709	-2.62146056949876
PLBD1	1	1	-0.27183335355564	-0.444897068140731
PLCB1	1	1	-3.23092549375339	0.11262940108992
PLCB2	1	1	-1.19136493734165	-2.88932527363084
PLCB4	1	1	-1.10820930532261	0.072154986264481
PLCD3	1	1	-0.666124039209326	-1.27384318172716
PLCE1	1	1	0.242609686338464	-0.870087278483139
PLCG2	1	1	-1.46644728711887	-2.21432269871019
PLCH1	1	1	-0.309436135805091	-0.801043165323959
PLCH2	1	1	-0.418150001085242	-0.70415629207872
PLCL1	1	1	-2.63177960447117	-2.33364619076036
PLCL2	1	1	-1.68296115926548	-2.66634048282884
PLCXD2	1	1	-1.73992507985874	-2.45743240177415
PLCXD3	1	1	-2.9264535241489	-1.13825811207079
PLD1	1	1	-0.344866209543189	1.3310957574866
[truncated: 1,003 more rows]
[truncated: 46 more columns]

## Sheet: AP-2α - PAM50
Additional file 1 – Content of modules from particular Monocle3 approach.
MODULE 1						MODULE 2						MODULE 3						MODULE 4						MODULE 5						MODULE 6						MODULE 7						MODULE 8						MODULE 9
id	module	supermodule	dim_1	dim_2		id	module	supermodule	dim_1	dim_2		id	module	supermodule	dim_1	dim_2		id	module	supermodule	dim_1	dim_2		id	module	supermodule	dim_1	dim_2		id	module	supermodule	dim_1	dim_2		id	module	supermodule	dim_1	dim_2		id	module	supermodule	dim_1	dim_2		id	module
A2ML1	1	1	1.05532581799396	-0.178262073018253		AAK1	2	1	0.608538460663642	2.01301066257745		ABCA1	3	2	-1.99384349144331	2.57678453304559		ABCA7	4	3	4.25232655995258	3.14103026368409		ACAP3	5	4	-3.55801646716229	-0.0559423746845131		ADCY9	6	5	-5.45443956858746	2.09289894678384		ACO2	7	6	0.722141814164008	6.10663930752069		ACO2	7	6	0.722141814164008	6.10663930752069		ABHD2	9
AAAS	1	1	-2.23979758031002	0.086941164515316		ACACA	2	1	-0.0452450991355526	3.51259152271539		ABCA2	3	2	-2.29684914953343	2.30169458367616		ABHD8	4	3	3.87972028248676	3.37606785871774		ACOT7	5	4	-3.12253503806225	0.317849081538021		ARHGAP17	6	5	-5.61097209460369	2.03770951607019		AP1B1	7	6	0.744272541931952	6.06679956295282		AP1B1	7	6	0.744272541931952	6.06679956295282		ADAMTS17	9
AACS	1	1	-2.25480062074295	0.0699447808483238		ACBD4	2	1	-0.166386771269952	3.7002282557705		ABCG1	3	2	-1.75046713955036	2.50647999026567		AKAP8L	4	3	4.0296130894936	3.4219832835415		AGRN	5	4	-3.35286872393719	-0.348093110539616		AXIN1	6	5	-5.47173373705975	2.09293614008218		ARSA	7	6	0.753477168015326	6.03489176609308		ARSA	7	6	0.753477168015326	6.03489176609308		AKAP13	9
AATK	1	1	-1.02356504208676	-2.28632362506598		ACER3	2	1	1.96893126957783	2.8246008945325		ABL1	3	2	-2.22151951796642	2.64781797730118		AP3D1	4	3	4.2541733502663	3.27559207060128		AHDC1	5	4	-3.41444890505901	-0.0571373286029702		BCL7C	6	5	-5.47331445223919	2.14848147012979		ARVCF	7	6	0.694300961426581	6.08006016590387		ARVCF	7	6	0.694300961426581	6.08006016590387		ANP32A	9
ABAT	1	1	-0.762696075507318	-0.822822171666325		ACLY	2	1	-0.176225113936578	3.58386186935693		ACSF3	3	2	-4.14795200831524	1.43453268387109		ARHGEF18	4	3	4.12614161961445	3.34477005579263		AK2	5	4	-3.3855320692741	0.167589586756527		BFAR	6	5	-5.56582443720928	2.12087426759988		ASCC2	7	6	0.754081082276191	6.00570432522088		ASCC2	7	6	0.754081082276191	6.00570432522088		ARID3B	9
ABCA13	1	1	0.11083967678913	-0.396389562108219		ACSL3	2	1	0.204116654328192	2.68783153460115		ACTN4	3	2	-3.86762802607647	2.92247539438993		ARID3A	4	3	4.24709851735004	2.8346743253687		ARHGEF19	5	4	-3.30103783614269	0.0557142911174888		C16orf72	6	5	-5.55799548632733	2.13694314338952		ATF4	7	6	0.652200770310248	5.96246950008661		ATF4	7	6	0.652200770310248	5.96246950008661		ARNT2	9
ABCA3	1	1	0.448455166748847	-1.54237182758063		ACTG1	2	1	-0.570650386878167	4.43030039646417		ADAMTS13	3	2	-2.52209131724468	2.11830912210733		ATP13A1	4	3	4.05695779316791	3.36757139541894		ARID1A	5	4	-3.32299308783642	0.0328761754253502		CARHSP1	6	5	-5.52638094431988	2.14074711181909		ATXN10	7	6	0.798214030197943	6.01564685680658		ATXN10	7	6	0.798214030197943	6.01564685680658		AVEN	9
ABCA4	1	1	0.155836653641547	-1.53817518375129		ACVR1	2	1	0.286957573822821	2.35213575937539		AGPAT2	3	2	-2.1298558593475	2.34272293426782		BRD4	4	3	3.93945796482929	3.40614352800637		BCOR	5	4	-2.9988185048782	-0.0281270327350502		CHTF18	6	5	-5.21209971911541	2.13852034189492		BCR	7	6	0.754949164322699	6.03618947841913		BCR	7	6	0.754949164322699	6.03618947841913		BAHD1	9
ABCB1	1	1	-0.181919860907708	-1.07487114093512		ADARB1	2	1	0.71733267300495	2.93127298035413		AKT1S1	3	2	-4.02088396556011	3.02283234574586		BSG	4	3	4.23419864170917	3.2602920351246		C1orf159	5	4	-3.55996840006939	-0.157401639439762		CLEC16A	6	5	-5.58159177310101	2.03671888687402		BID	7	6	0.745782446793402	6.01820270397454		BID	7	6	0.745782446793402	6.01820270397454		BMF	9
ABCB9	1	1	-2.37590097195736	0.0629131016948814		ADCY3	2	1	0.181499552658881	1.79841504671365		AKT2	3	2	-3.97167472846142	2.96638376691133		BTBD2	4	3	4.29182250492939	3.19704384782106		CAMTA1	5	4	-3.30788879401318	0.201760929606258		COG7	6	5	-5.57740561968914	2.02343181946069		CABIN1	7	6	0.713043284348334	6.04459015705377		CABIN1	7	6	0.713043284348334	6.04459015705377		C15orf41	9
ABCC1	1	1	-1.67196102745167	-0.980937320210636		AFAP1	2	1	0.496487212113227	1.67848996498376		AMFR	3	2	-4.2019075632774	1.38833276607782		C19orf57	4	3	3.90946252339252	3.37519804813653		CAPZA1	5	4	-3.28271846778027	0.217143457911312		CORO7	6	5	-5.51334826953045	2.0885059652546		CDC42EP1	7	6	0.739312243393744	5.98120586254388		CDC42EP1	7	6	0.739312243393744	5.98120586254388		CD276	9
ABCC11	1	1	-0.422972011634027	-0.238169509389103		AGAP1	2	1	0.236780238083686	2.41852955200463		ANAPC2	3	2	-2.2845811129295	2.50588547863752		CARM1	4	3	4.02967889302143	3.3959229407528		CAPZB	5	4	-3.3946303606712	0.16655914165765		CREBBP	6	5	-5.50658075816265	2.09605399944574		CECR2	7	6	0.798534464768256	5.66163913585931		CECR2	7	6	0.798534464768256	5.66163913585931		CHD2	9
ABCC12	1	1	-0.402554917403375	-3.29390009067267		AGBL5	2	1	0.602786374024237	2.03326271154672		ANKRD11	3	2	-4.11229436404339	1.43964425899774		CCDC124	4	3	4.01544625752338	3.38258419611245		CASZ1	5	4	-3.12492172724835	0.0865625558117027		E4F1	6	5	-5.42209260470501	2.12135867454797		CERK	7	6	0.801355910233344	5.95155112125665		CERK	7	6	0.801355910233344	5.95155112125665		CHSY1	9
ABCC3	1	1	-1.14694522626034	-0.634999352910221		AGPAT3	2	1	0.675535750321234	2.98117170908242		ANKRD27	3	2	-3.93974106318585	2.94379356183797		CIRBP	4	3	3.40451200001606	2.64371647366077		CC2D1B	5	4	-3.4767870188438	0.0529908356884117		EEF2K	6	5	-5.55739347941509	2.04227505304605		CLTCL1	7	6	0.737622094086493	6.02915326931268		CLTCL1	7	6	0.737622094086493	6.02915326931268		CIB2	9
ABCC4	1	1	0.688810896805609	-1.50376566074103		AHNAK	2	1	2.15045363896259	2.70878271019772		AP2A1	3	2	-3.94534699923626	2.96438769676477		CNN2	4	3	4.11951930516132	2.97376237489968		CDC14A	5	4	-2.98095529086224	0.00936285831719585		EME2	6	5	-5.14036934382549	2.07045773842126		COMT	7	6	0.784696650437201	5.9648904023388		COMT	7	6	0.784696650437201	5.9648904023388		CLK3	9
ABCC8	1	1	-0.639918136664544	-2.47322662494391		AKAP1	2	1	-0.509499716826593	4.33414522983819		APRT	3	2	-4.09876363284222	1.45398930885583		CRTC1	4	3	4.0230851887978	3.36808506824762		CLSTN1	5	4	-3.33994333750836	0.117102306864559		ERI2	6	5	-5.59956424243084	2.14084015466958		CSNK1E	7	6	0.71116025441059	6.10599176265985		CSNK1E	7	6	0.71116025441059	6.10599176265985		CLN6	9
ABCD1	1	1	3.3798795460976	-0.159782964207829		ALKBH3	2	1	1.93765718930134	2.64343404450208		ARHGEF1	3	2	-3.89242630011669	2.84470168926507		CSNK1G2	4	3	4.3027950047768	3.17923865892678		CROCC	5	4	-3.53642933375469	-0.129622298695744		FAHD1	6	5	-5.46578948504559	2.13747183658868		CYB5R3	7	6	0.811847281388129	5.98409287311822		CYB5R3	7	6	0.811847281388129	5.98409287311822		CRTC3	9
ABCG2	1	1	2.39088399403461	-2.25314481876105		AMBRA1	2	1	1.90934426777729	2.60614210047513		ARRDC1	3	2	-2.29402675039402	2.43324644543916		DAZAP1	4	3	4.30267531865009	3.18765635468751		CTNNBIP1	5	4	-3.37246267802349	0.154696386835873		FBXL19	6	5	-5.63363854891888	2.00969783642083		DEPDC5	7	6	0.745759558609809	6.12496463634759		DEPDC5	7	6	0.745759558609809	6.12496463634759		CSK	9
ABHD11	1	1	0.121009659699286	1.00479666569024		AMOTL1	2	1	1.31966073506245	2.56458638288766		ASF1B	3	2	-2.7668135643684	1.21643452026635		DNM2	4	3	4.05120332234272	3.38404176809579		DHRS3	5	4	-2.95170812613598	0.0690910039165611		GFER	6	5	-5.4874550581657	2.12844435550958		DGCR2	7	6	0.783082318238105	6.02031533100396		DGCR2	7	6	0.783082318238105	6.02031533100396		CSNK1G1	9
ABHD3	1	1	1.05304749005207	0.72313336708337		ANAPC11	2	1	-0.620936322280084	4.45464388706475		ATG16L2	3	2	-3.16313188082806	1.80374644377023		DNMT1	4	3	3.95533998005756	3.39133934356958		DNAJC16	5	4	-3.3378299952232	0.0998772797802085		GLYR1	6	5	-5.5266408205711	2.09713481046945		EP300	7	6	0.795394492081488	6.07344333507806		EP300	7	6	0.795394492081488	6.07344333507806		CYFIP1	9
ABLIM1	1	1	1.12326939099201	0.0549580273845787		ANKMY1	2	1	0.126416754654731	2.56642612495214		ATP6V0D1	3	2	-4.17498414523235	1.33950464107782		DOT1L	4	3	4.30777509205707	3.18320859648973		DVL1	5	4	-3.52051167494885	-0.0271158995410805		GTF3C1	6	5	-5.59939448840252	2.05917046644479		EWSR1	7	6	0.718750786713446	6.06461827137262		EWSR1	7	6	0.718750786713446	6.06461827137262		DMXL2	9
ABLIM2	1	1	0.114699435166205	-1.14110739848822		ANKRD39	2	1	0.488759350708808	2.1852382240513		AUH	3	2	-2.14001930064789	2.51796009816915		DPP9	4	3	4.26099927418598	3.26031677105218		EBNA1BP2	5	4	-3.45956854827038	0.102201860926449		HCFC1R1	6	5	-5.54264013774029	2.14328609087259		GAS2L1	7	6	0.745229077271308	6.04063813068658		GAS2L1	7	6	0.745229077271308	6.04063813068658		DNAJC17	9
ABTB2	1	1	1.11035187237629	-0.542027551152409		ANKRD44	2	1	1.33968574993976	1.57994632103234		BANP	3	2	-4.17707626826397	1.41659788467675		ECSIT	4	3	4.02138812535175	3.38115964510232		EFHD2	5	4	-3.19632010466686	0.0840453324535484		IFT140	6	5	-5.49685876376263	2.04180805065423		GGA1	7	6	0.756761145523871	6.07551590778619		GGA1	7	6	0.756761145523871	6.07551590778619		EHD4	9
ACBD6	1	1	2.22866828434833	1.29594842769891		ANKS1A	2	1	1.09259779446491	3.6178445039013		BCAM	3	2	-3.74875228411785	2.63550228305846		ELL	4	3	4.12423617833027	3.35496674158364		EIF4G3	5	4	-3.34803049571148	0.0165664372661705		IQCK	6	5	-5.53141014582745	2.0458783922413		GRAMD4	7	6	0.81011421673664	5.97555486538202		GRAMD4	7	6	0.81011421673664	5.97555486538202		ETFA	9
ACHE	1	1	-0.945887255736505	-2.78575475833625		AP2A2	2	1	1.89618594639667	2.53404341318399		BCAR1	3	2	-4.09433405406109	1.42852799274713		EPS15L1	4	3	4.00933415882954	3.39695278980523		EPB41	5	4	-3.33242945677868	0.00434033252984234		JMJD8	6	5	-5.45269386775128	2.12159345724374		JOSD1	7	6	0.70587403767475	6.13711826183587		JOSD1	7	6	0.70587403767475	6.13711826183587		FURIN	9
ACOT11	1	1	0.166487288407172	0.289680641672909		AP2B1	2	1	-0.289274382659112	3.67670719005853		BCAT2	3	2	-3.93699460036389	2.8139447984913		EVI5L	4	3	4.11953599446186	3.33854798652917		ERI3	5	4	-3.51632027632824	0.109859865687191		KIAA0556	6	5	-5.58532946116558	2.01211242058068		KIAA1671	7	6	0.783052039078559	6.09887711384088		KIAA1671	7	6	0.783052039078559	6.09887711384088		GALK2	9
ACOX2	1	1	-1.03404818780056	-0.91726859233588		APLF	2	1	0.229755473069037	1.96885935642511		BCKDHA	3	2	-3.96659951216808	2.95556942798883		GATAD2A	4	3	4.03184373371967	3.45535878517419		FAF1	5	4	-3.45705013281933	0.143008869669735		KREMEN2	6	5	-5.05477778918377	1.89747647621423		KREMEN1	7	6	0.896960806778754	5.65845815517694		KREMEN1	7	6	0.896960806778754	5.65845815517694		GLCE	9
ACOX3	1	1	-0.829625773497735	2.37262375333101		APPBP2	2	1	-0.42756478793255	4.29191116668969		BICD2	3	2	-2.19471133060089	2.54957794823438		GNA11	4	3	3.77733190052875	3.13091139175683		FOXJ3	5	4	-3.30052428252331	0.0899674115398521		LCMT1	6	5	-5.49746077067486	2.12708924391061		LIMK2	7	6	0.787132811478461	6.11544815876275		LIMK2	7	6	0.787132811478461	6.11544815876275		HERC2	9
ACOXL	1	1	0.957676720551337	-1.77160986087531		AR	2	1	1.30489308827289	1.47890393116265		BLVRB	3	2	-3.90181999213329	2.8453011629799		GNB1L	4	3	3.9378948926247	3.30599836685449		GNB1	5	4	-3.41114025122753	0.0863410649517173		LITAF	6	5	-5.51924149996868	2.13863788225442		LMF2	7	6	0.813793969086493	5.99926082470208		LMF2	7	6	0.813793969086493	5.99926082470208		HMG20A	9
ACSBG1	1	1	-2.22943432933918	-2.45597227237433		ARAP1	2	1	2.11775500767597	3.04926655866891		BRCA1	3	2	-2.71536474234692	1.24590687134057		GPX4	4	3	4.22904260151752	3.29276089050561		GNG12	5	4	-3.2581625462257	0.18982140400201		LMF1	6	5	-5.54497044093243	2.0120420274952		LRP5L	7	6	0.651457381180609	6.03856460430413		LRP5L	7	6	0.651457381180609	6.03856460430413		IGF1R	9
ACSF2	1	1	-0.539047646590387	-0.444024878956974		ARHGAP32	2	1	2.06925876133808	3.05370364763528		BRD3	3	2	-2.23062461919418	2.62451045640498		HAUS8	4	3	3.96547038548359	3.42939601518899		GPR153	5	4	-3.39318196780316	0.0817495999553794		MAPK3	6	5	-5.63936512477032	2.00029007770806		MED15	7	6	0.727075648239936	6.05094377376825		MED15	7	6	0.727075648239936	6.05094377376825		IQGAP1	9
ACSL1	1	1	-0.492014932700311	1.87375728466302		ARHGDIA	2	1	-0.550119328566705	4.39603571274072		BRIP1	3	2	-2.76377629048458	1.17703847267419		HOOK2	4	3	4.13751323216328	3.31362180092126		H6PD	5	4	-3.25776247984997	0.0565718827465171		MAZ	6	5	-5.45430605418316	1.97738371469766		MICAL3	7	6	0.716587853363837	6.09635321476251		MICAL3	7	6	0.716587853363837	6.09635321476251		IVD	9
ACSL6	1	1	0.40203578465351	-1.10133751056403		ARHGEF17	2	1	2.11840302937397	2.9316623178938		BTBD19	3	2	-3.33955090052715	1.80517194845468		ILF3	4	3	4.02244002812275	3.38839785434991		HDAC1	5	4	-3.35270278460613	0.0350603280284996		METRN	6	5	-5.16751067645184	2.14186750032693		MPST	7	6	0.75966460698017	6.01231781818658		MPST	7	6	0.75966460698017	6.01231781818658		JMJD7-PLA2G4B	9
ACSM3	1	1	-0.479566025801812	-0.734216052510441		ARHGEF7	2	1	-1.66320811516873	3.6729952512005		C19orf47	3	2	-3.93512766368023	2.94690715946943		KDM4B	4	3	4.18066985600361	3.22126726486474		HIPK1	5	4	-2.96944473988644	0.159994524500668		MGRN1	6	5	-5.50290839678875	2.10257707216531		MTMR3	7	6	0.783609461716498	6.06181923725396		MTMR3	7	6	0.783609461716498	6.06181923725396		LRRK1	9
ACSS3	1	1	0.649600338867987	-2.77387769839972		ARMC9	2	1	0.288151574066962	2.44494150259286		C21orf58	3	2	-2.76803933388821	1.15738539078027		KEAP1	4	3	3.98990304463276	3.35113851406366		HS2ST1	5	4	-2.95417361266247	0.169856470606625		MPV17L	6	5	-5.52243535525433	1.87496839144021		MYH9	7	6	0.780385088852729	6.02569095470697		MYH9	7	6	0.780385088852729	6.02569095470697		MAP2K5	9
ACTA2	1	1	0.943482708863105	-3.84584291599006		ASPSCR1	2	1	-0.605493474074517	4.43562571384698		CALM3	3	2	-3.9381410361015	2.83767068066388		KLF16	4	3	4.24501903050312	3.1520284531334		JAG2	5	4	-3.33381299979321	-0.500416118123234		MVP	6	5	-5.46378843791119	2.03723565914422		NCAPH2	7	6	0.807153773239936	6.06911651470453		NCAPH2	7	6	0.807153773239936	6.06911651470453		MAPK6	9
ACTB	1	1	0.996671032837714	-3.926816064336		ATF2	2	1	1.03897244923481	2.00976828911096		CAMSAP1	3	2	-2.27603821761242	2.61345801182777		KLHL26	4	3	3.93243224614033	3.35546497680932		JAK1	5	4	-3.33338050849072	0.128983181498348		NDUFB10	6	5	-5.44419591433636	2.15594659426004		NF2	7	6	0.716338944367255	6.01796285488397		NF2	7	6	0.716338944367255	6.01796285488397		MAPKBP1	9
ACTN1	1	1	0.813042950562323	-3.85444601199836		ATG16L1	2	1	0.237443280152167	2.47241027333528		CAPN12	3	2	-3.71694009310833	2.68827815034181		LMNB2	4	3	4.26206405156025	3.22614125587732		KIAA0319L	5	4	-3.31682877547375	0.0749365506389732		NMRAL1	6	5	-5.52209298617474	2.1118687806347		OSBP2	7	6	0.729748082093085	6.04337422230035		OSBP2	7	6	0.729748082093085	6.04337422230035		MEF2A	9
ACTR6	1	1	-2.21664668924442	0.0273660836437339		ATM	2	1	1.82368214123615	2.82932131417781		CATSPERG	3	2	-3.70146350867382	2.73473878816456		LONP1	4	3	4.25297982685932	3.23341612198144		LAMA5	5	4	-3.17514495856396	-0.554995376088322		NSMCE1	6	5	-5.47118799693218	2.11687652447015		PACSIN2	7	6	0.711038660935248	6.09267918445855		PACSIN2	7	6	0.711038660935248	6.09267918445855		MGA	9
ACVR1B	1	1	-2.20870706743828	0.0699369130352134		ATP11A	2	1	-1.68445946580998	3.66020993568689		CCDC102A	3	2	-4.18419759280316	1.43599371292382		LRRC8E	4	3	3.6617718457497	3.14116967894822		LDLRAP1	5	4	-3.22639195925823	-0.00855358264654926		NTHL1	6	5	-5.36786286837689	2.13912228920251		PARVB	7	6	0.969780754975165	5.70288769581109		PARVB	7	6	0.969780754975165	5.70288769581109		MYO1E	9
ACVRL1	1	1	2.6616178273476	-2.38506277225226		ATP6V1E2	2	1	0.503430437973822	2.1001255331257		CCDC106	3	2	-3.89567713744274	2.90969900467187		LSM4	4	3	4.00280911915668	3.42850486614495		LRRC8D	5	4	-3.22575156695477	0.083497446558773		NTN3	6	5	-5.23233335024944	2.05873612739831		PATZ1	7	6	0.691284489563788	6.03259054996759		PATZ1	7	6	0.691284489563788	6.03259054996759		MYO5A	9
ACYP2	1	1	-1.06864975697628	2.49151622929364		ATP7B	2	1	-1.64758767492405	3.64930121280938		CCDC154	3	2	-3.08800237185589	1.78924087860376		MAP2K7	4	3	4.12442452900776	3.30350295879632		LUZP1	5	4	-3.24622337824932	0.0859445748546714		ORAI3	6	5	-5.53146569735638	2.09469459631234		PI4KA	7	6	0.835015845230902	6.15558401920587		PI4KA	7	6	0.835015845230902	6.15558401920587		NEDD4	9
ADA	1	1	1.06725056164631	-0.884833651997746		ATXN1	2	1	1.05873973362812	3.65480796673089		CCDC61	3	2	-3.92571573264233	2.82459820487291		MAST3	4	3	3.88185746662983	3.25307653524667		MAP7D1	5	4	-3.45787863738171	0.00530092098504253		PAQR4	6	5	-5.04769365794293	1.87952123262674		PICK1	7	6	0.715827059677924	6.01883046009332		PICK1	7	6	0.715827059677924	6.01883046009332		NEO1	9
ADAM11	1	1	-1.0700504661285	-2.25116451404303		B3GNTL1	2	1	-0.652402091094171	4.47037820198327		CCDC97	3	2	-3.81661121852032	2.8709095088461		MED16	4	3	4.25554950230488	3.22830603697091		MAST2	5	4	-3.4530814171516	0.124954145930111		PARN	6	5	-5.56894629008404	2.04364297964364		PITPNB	7	6	0.747403216294135	6.07772628643304		PITPNB	7	6	0.747403216294135	6.07772628643304		NPTN	9
ADAM12	1	1	2.06964404576191	-3.61796672961921		BAD	2	1	2.19949061863788	3.11741287686616		CCNF	3	2	-2.83532356030575	1.21373395302087		MED26	4	3	3.99078042500385	3.40581397392541		MIB2	5	4	-3.51125757701031	-0.118688422658146		PHKG2	6	5	-5.54815690524212	2.02922199346811		PLA2G6	7	6	0.697434496811713	6.06978313305169		PLA2G6	7	6	0.697434496811713	6.06978313305169		PDE8A	9
ADAM15	1	1	2.31935794346699	1.28574971534997		BAIAP2	2	1	-0.620561647483026	4.44439582206994		CD3EAP	3	2	-3.8841892958366	2.92781565763742		MKNK2	4	3	4.24213607304462	3.19440172292978		MKNK1	5	4	-3.30359940535656	0.270486753962337		PIGQ	6	5	-5.36407248980633	2.11112443783075		PLXNB2	7	6	0.721752715042914	6.07043473102838		PLXNB2	7	6	0.721752715042914	6.07043473102838		PPCDC	9
ADAM19	1	1	1.88922269337543	-1.2761390986225		BCAS3	2	1	-0.385555315085565	4.14356378891259		CDC14B	3	2	-2.05182945288054	2.45552314498216		MLLT1	4	3	4.13217742436298	3.32085184433252		MTHFR	5	4	-3.13051955706707	0.0907532391765709		PKD1	6	5	-5.44396703250042	2.14234481432229		POLR2F	7	6	0.74994928830036	6.04387180187494		POLR2F	7	6	0.74994928830036	6.04387180187494		PPIB	9
ADAM33	1	1	1.6193118809975	-2.9746905150196		BCL9L	2	1	2.06172378056415	3.0429701326111		CDC25B	3	2	-2.53897397524944	1.41281072475702		MRPL34	4	3	3.94368321888813	3.43021009542733		NADK	5	4	-3.43918411738506	0.0270923791149253		PRR14	6	5	-5.63514726168743	1.97208492138177		POLR3H	7	6	0.739980530670966	5.99595419742852		POLR3H	7	6	0.739980530670966	5.99595419742852		PTPN9	9
ADAM8	1	1	2.14974839680561	-0.205883819081486		BIRC6	2	1	0.527317356995429	2.23684794881135		CDC6	3	2	-2.80947135693661	1.20866934635431		MYO9B	4	3	4.01836450093159	3.38504545070916		NIPAL3	5	4	-2.8829178691589	-0.112835723378361		RAB11FIP3	6	5	-5.50582258708111	2.15711943485528		PPM1F	7	6	0.704567742279853	5.81194917537957		PPM1F	7	6	0.704567742279853	5.81194917537957		RAB11A	9
ADAMTS10	1	1	2.11286885731586	-3.11052377841681		BPHL	2	1	1.135777783326	3.67730568029672		CDK10	3	2	-4.07086913592449	1.43154267647058		NDUFA11	4	3	4.07766826146015	3.36878041603357		NOC2L	5	4	-3.45850603587261	0.0227374253490562		RAB26	6	5	-5.44588773257366	2.14547387935907		PRR5	7	6	0.87234623425373	5.8468164620617		PRR5	7	6	0.87234623425373	5.8468164620617		RORA	9
ADAMTS12	1	1	1.98149950497517	-3.54743488452643		BRWD1	2	1	0.793789935044135	2.84517095663339		CDKN2C	3	2	-2.68838028914562	1.11872772552758		NFIC	4	3	3.85428149693378	3.16266075947076		NPHP4	5	4	-3.41580717570416	-0.22750504634589		RAB40C	6	5	-5.57451145655743	2.05038658954889		RNF215	7	6	0.736494851044501	6.06015030720025		RNF215	7	6	0.736494851044501	6.06015030720025		RPP25	9
ADAMTS14	1	1	2.09463746540913	-3.56471546313971		BSCL2	2	1	2.20971019261249	3.04507265665322		CDT1	3	2	-2.77540235526196	1.17366115429193		NFIX	4	3	3.68369014256367	3.08202911593705		OMA1	5	4	-3.27022020823589	0.34319488384515		RABEP2	6	5	-5.47654383189312	2.13317326881677		RPS19BP1	7	6	0.745396208695258	6.00284902431756		RPS19BP1	7	6	0.745396208695258	6.00284902431756		SCAMP2	9
ADAMTS16	1	1	1.97615249150165	-3.6058989348194		BTBD9	2	1	1.03064949505695	3.6314559397915		CENPA	3	2	-2.7969911575996	1.1920974669674		NR2F6	4	3	4.02901513569721	3.40386168339044		OSBPL9	5	4	-3.42525749213329	0.208720129511654		RHBDF1	6	5	-5.52575962550274	2.10001609899789		RTN4R	7	6	0.775400710038031	6.00976912357599		RTN4R	7	6	0.775400710038031	6.00976912357599		SCAPER	9
ADAMTS18	1	1	1.77328617565998	-2.58338173053473		C11orf49	2	1	1.83934218876728	2.53085092880517		CENPP	3	2	-2.23816936022869	2.41140933015138		OAZ1	4	3	4.24036033146747	3.23560283758432		PARK7	5	4	-3.41619007594219	0.100409906885921		RNF151	6	5	-5.37884514338604	2.08977935888559		SBF1	7	6	0.789101672104682	5.96221391536981		SBF1	7	6	0.789101672104682	5.96221391536981		SEMA4B	9
ADAMTS2	1	1	2.07755429737934	-3.56501300952643		C11orf80	2	1	2.17076785557636	2.81356549688369		CENPT	3	2	-3.79290633208386	1.52066425659448		PCDHA1	4	3	12.8689685582436	4.26525000908166		PEX14	5	4	-3.49124233729473	0.00159160473138042		RNF40	6	5	-5.57613937861553	2.03634528496057		SFI1	7	6	0.731084418228949	6.08585564472467		SFI1	7	6	0.731084418228949	6.08585564472467		SERF2	9
ADAMTS4	1	1	2.74494607441791	0.37523571827203		C11orf95	2	1	2.09408814900288	2.92430638947278		CEP72	3	2	-2.44116367704502	1.41774098255426		PCDHA10	4	3	12.8443666219033	4.2404350457409		PHC2	5	4	-3.4486515999519	0.0552629647472496		ROGDI	6	5	-5.50216310031048	2.11552087642938		SH3BP1	7	6	0.746273112229193	6.09088794567376		SH3BP1	7	6	0.746273112229193	6.09088794567376		SIN3A	9
ADAMTS5	1	1	2.02250154011616	-3.14481456897467		C2CD2	2	1	0.78485877507099	2.83591204561979		CFDP1	3	2	-4.16826193339459	1.39806143619806		PCDHA11	4	3	12.843443465165	4.23900596477777		PLEKHG5	5	4	-3.45412473685375	-0.121456700780094		SLC9A3R2	6	5	-5.0287741900169	1.9969230113247		SLC25A1	7	6	0.842570614746894	5.93881933071405		SLC25A1	7	6	0.842570614746894	5.93881933071405		SMAD3	9
ADAMTS6	1	1	1.90497786991962	-3.42123087070197		C2CD3	2	1	2.13366277211079	3.04640198924333		CHD9	3	2	-4.18715779788128	1.35520986892968		PCDHA12	4	3	12.8398423909462	4.23352364876062		PLEKHM2	5	4	-3.47162561423412	0.00507132389336773		SMG1	6	5	-5.52204148776165	2.06947438099176		SLC35E4	7	6	0.784473490647162	6.07339016773492		SLC35E4	7	6	0.784473490647162	6.07339016773492		SNX1	9
ADAMTS7	1	1	2.31983859532246	-3.08908231876105		C6orf89	2	1	1.05543882840046	3.65863184311181		CIC	3	2	-3.81832330233685	2.89801266469747		PCDHA13	4	3	12.8087793111123	4.20486227848321		POMGNT1	5	4	-3.41739349372021	0.0604588208416099		SNX29	6	5	-5.5552634478294	2.04772989132196		SMARCB1	7	6	0.749792647293891	6.0550638852337		SMARCB1	7	6	0.749792647293891	6.0550638852337		SNX22	9
ADAMTS8	1	1	0.694285702637519	-3.3743635000965		CAB39L	2	1	-1.67597510225407	3.49328176357537		CIT	3	2	-2.6486467004501	0.972230833552181		PCDHA2	4	3	12.8502412556923	4.24592975952417		PPIE	5	4	-3.41283504969708	0.126013439677059		SRCAP	6	5	-5.55088703639141	2.04313580372125		SREBF2	7	6	0.809409451416816	5.99634711124688		SREBF2	7	6	0.809409451416816	5.99634711124688		SPTBN5	9
ADAMTS9	1	1	1.51292808049091	-2.000950414159		CAPN1	2	1	2.16317327015766	3.15585891582757		CIZ1	3	2	-2.21546219594113	2.42931796290666		PCDHA3	4	3	12.8470102071083	4.24281493999749		PRDM2	5	4	-3.2818795920097	0.10832087375909		STUB1	6	5	-5.38890020854107	2.16230348922998		TBC1D10A	7	6	0.72141416066059	6.05894462444574		TBC1D10A	7	6	0.72141416066059	6.05894462444574		TBC1D2B	9
ADAMTSL1	1	1	1.82081587307819	-3.09563120029181		CARS2	2	1	-1.66237984902493	3.68018661119729		CLSPN	3	2	-2.78826986558071	1.14730004646569		PCDHA4	4	3	12.8337798833168	4.22974757530481		PRKCZ	5	4	-3.23815588957897	0.132101934931576		TBC1D24	6	5	-5.35065619952313	2.1724915323475		TBC1D22A	7	6	0.772136759690131	6.03344885685235		TBC1D22A	7	6	0.772136759690131	6.03344885685235		TCF12	9
ADAMTSL2	1	1	1.95235044949421	-3.07010324619025		CASKIN2	2	1	-0.552245545455133	4.33168427326471		CMIP	3	2	-4.19574944979778	1.36110762932092		PCDHA5	4	3	12.8510413884438	4.24675933697015		PTP4A2	5	4	-3.34311800009838	0.129686277888119		TBL3	6	5	-5.392293858596	2.14617256500512		TCF20	7	6	0.789072108200873	6.08125511982232		TCF20	7	6	0.789072108200873	6.08125511982232		TJP1	9
ADAMTSL3	1	1	0.96516211026081	-3.1158128561756		CBLN3	2	1	-0.0801175118171322	2.17582462408334		CORO2A	3	2	-1.66821517355076	2.21445820905954		PCDHA6	4	3	12.8476539372719	4.24337796547204		PUM1	5	4	-3.18169658190838	0.056731146357357		TFAP4	6	5	-5.28831236369244	2.22025815822869		TEF	7	6	0.813466620377387	5.96475593426019		TEF	7	6	0.813466620377387	5.96475593426019		TLE3	9
ADAMTSL4	1	1	1.35541636937031	-0.281613666035831		CBX4	2	1	-0.394598889418756	4.34927574970514		COTL1	3	2	-4.1523310423576	1.3192902026394		PCDHA7	4	3	12.849209380082	4.24495319702417		PUSL1	5	4	-3.55174605853191	-0.0153919043323403		TNRC6A	6	5	-5.53361980921856	2.05588976719171		TMEM184B	7	6	0.726723503998603	6.02507750370294		TMEM184B	7	6	0.726723503998603	6.02507750370294		TLN2	9
ADAMTSL5	1	1	-1.15914856202236	-1.92165239474982		CBX8	2	1	-0.516966629096185	4.3888965068081		CPNE2	3	2	-3.84903447634808	1.09190444328576		PCDHA8	4	3	12.8558459996498	4.2515069661358		RAP1A	5	4	-3.2755399227821	0.29063026287347		TRAP1	6	5	-5.39858191020123	2.1733328519085		TNRC6B	7	6	0.73859674923786	6.06690661289483		TNRC6B	7	6	0.73859674923786	6.06690661289483		TMED3	9
ADAP1	1	1	0.0502513169563663	-0.508944350697697		CCDC47	2	1	-0.446303892203485	4.30296460964471		CRAT	3	2	-2.22473459250561	2.56114314176828		PCDHA9	4	3	12.8490968465126	4.2446927247265		RCC2	5	4	-3.40055387026898	0.0819038567760582		TSC2	6	5	-5.43955962664715	2.11956517078668		TOM1	7	6	0.780533862046088	6.04010359623224		TOM1	7	6	0.780533862046088	6.04010359623224		TTC23	9
ADARB2	1	1	0.691922497681464	-1.93353708408088		CCDC57	2	1	-0.734712767668878	4.40424339153558		CSAD	3	2	-3.1321323395454	1.77906368353158		PCDHAC1	4	3	12.8389116048134	4.23518316128045		RERE	5	4	-3.37218909270397	0.0621053395488853		TXNDC11	6	5	-5.56667964465252	2.04085550882608		TPST2	7	6	0.754974913529242	6.05866162159234		TPST2	7	6	0.754974913529242	6.05866162159234		ULK3	9
ADCY2	1	1	1.28826243870624	-2.77339704654425		CCDC93	2	1	0.0493732213295353	2.60716247238904		CTCF	3	2	-4.21581046588055	1.3923269925335		PCDHAC2	4	3	12.8414235829628	4.23787121155053		RNF220	5	4	-3.42213873870007	0.105186146281063		UNKL	6	5	-5.44192903048626	2.12585524894983		TRIOBP	7	6	0.776723933152045	6.05351750232965		TRIOBP	7	6	0.776723933152045	6.05351750232965		UNC45A	9
ADCY5	1	1	0.663916659287299	-3.69764145038337		CCND3	2	1	1.07889659397968	3.63592658617288		CTNNAL1	3	2	-1.80843241817585	2.51115746476442		PEX11G	4	3	4.25595052235493	3.16168476321489		RPS6KA1	5	4	-3.23398022658459	0.0658692536571617		USP7	6	5	-5.59871618754498	2.02845768310815		TTC28	7	6	0.589206051758612	5.92325465061456		TTC28	7	6	0.589206051758612	5.92325465061456		VPS18	9
ADCY6	1	1	-2.19606925851933	0.379087847254574		CD151	2	1	1.87514336102375	2.30878658273011		CYBA	3	2	-3.9788451672279	1.47604803421289		PGPEP1	4	3	3.6900077580727	3.08763946273118		RSBN1	5	4	-3.0213073969566	0.225277346155941		WDR24	6	5	-5.37957160479656	2.18551920034677		TTLL1	7	6	0.76672084324726	6.08444897510797		TTLL1	7	6	0.76672084324726	6.08444897510797		ZNF280D	9
ADCY7	1	1	3.11171443455585	-0.971286612965763		CD59	2	1	1.80101282589802	2.43418027140886		DAB2IP	3	2	-2.20398913628689	2.622928720496		PIAS4	4	3	4.2010408162392	3.22992764093667		SKI	5	4	-3.43641548163525	-0.0102828326007729		WDR90	6	5	-5.37512462145916	2.0991141019085		TXNRD2	7	6	0.752388548783149	6.00945202686578		TXNRD2	7	6	0.752388548783149	6.00945202686578		ZNF609	9
ADD1	1	1	-0.894139218398248	2.44626645424157		CD81	2	1	1.85800321095356	2.25875352003366		DBNDD1	3	2	-4.16420738703838	1.37170140125543		PIK3R2	4	3	3.97450501912006	3.37719343282968		SLC9A1	5	4	-3.0477247715675	0.10785405018121		WFIKKN1	6	5	-5.45435731417767	2.1052165446499		ZC3H7B	7	6	0.772854876450385	6.02467815258294		ZC3H7B	7	6	0.772854876450385	6.02467815258294
ADD2	1	1	-0.819377112456475	-2.13149459979743		CDC42EP4	2	1	-0.481910514899408	4.13758770801812		DBP	3	2	-3.83592872626415	2.85192028858453		PIP5K1C	4	3	4.21985537999042	3.26269285061151		SPEN	5	4	-3.32083778388134	0.0390769658306236		XPO6	6	5	-5.57573072917095	2.04325322487146		ZDHHC8	7	6	0.753582787445868	6.03318445064813		ZDHHC8	7	6	0.753582787445868	6.03318445064813
ADHFE1	1	1	0.747875523499335	-2.33350332401007		CDK2AP2	2	1	2.17730386250385	3.12375239708215		DCST2	3	2	-2.73668603903881	1.99106697418481		PKN1	4	3	3.76973493092426	3.28978751280099		SSBP3	5	4	-3.39194493300549	0.156844061396419		ZNF213	6	5	-5.56539671427837	2.06825612165719
ADM	1	1	-2.33784731037251	-0.939019042470158		CDKAL1	2	1	1.13365561955341	3.71486262657434		DDB2	3	2	-2.50998001105419	1.1414177832821		PLEKHJ1	4	3	4.28987414830097	3.19396169163972		SSU72	5	4	-3.44173865325085	0.114532154581844		ZNF263	6	5	-5.5118166685783	2.10835705377847
ADORA1	1	1	1.62793595784077	-0.753472882725895		CDYL	2	1	1.08980138295063	3.67410967924386		DEDD2	3	2	-3.88793199069134	2.89543749072343		PRDM15	4	3	3.47554643147358	3.17738701083451		ST3GAL3	5	4	-3.4725465059959	0.0232860264995689		ZNF598	6	5	-5.39901058680645	2.09811459162027
ADORA2A	1	1	2.44725425236591	-1.03714235446662		CDYL2	2	1	1.32595427029499	1.62684027530938		DENND1A	3	2	-2.20501555807224	2.56541703321725		PRDX2	4	3	4.03290565007099	3.39411393978387		STK40	5	4	-3.36407487399212	0.132185381434261		ZNF747	6	5	-5.58108608729473	1.99160830356866
ADPRHL1	1	1	-0.156845498152887	-4.23775823734015		CEBPZ	2	1	0.517239880493964	2.20989699342042		DIAPH3	3	2	-2.80210171944729	1.17664627411157		PTBP1	4	3	4.26200158589252	3.24614624359399		TESK2	5	4	-3.11883049018017	-0.0850165667316323
ADRA1B	1	1	0.288817477158393	-2.42688949725837		CFL1	2	1	2.2173982381142	3.18373645522386		DMPK	3	2	-3.67390017516247	2.56251026370317		RAB3D	4	3	3.69576270573505	3.16793559171945		TMCO4	5	4	-3.42736964232556	0.0687488732555503
ADRA1D	1	1	0.671620917252387	-3.13850935123175		CFLAR	2	1	0.747457098893012	2.1179528651455		DNAH1	3	2	-3.18114428526989	1.80413226463586		RANBP3	4	3	4.14526088230976	3.30654690840036		TMEM53	5	4	-3.4281448603355	0.0729481396892662
AEBP2	1	1	-1.92001891440979	0.0879294095256919		CHID1	2	1	1.88852508061298	2.57374539651662		E2F1	3	2	-2.79375396973721	1.1782248435238		REXO1	4	3	4.25130660527119	3.2291948614338		TMTC2	5	4	-2.71942209012142	-0.141411382176579
AFAP1L1	1	1	2.62449891560444	-2.61655767581672		CLASP1	2	1	0.400837492874945	2.32020519354135		E2F2	3	2	-2.82178835875622	1.15151504852563		RFX1	4	3	4.10168368809589	3.35081438400537		TRAPPC3	5	4	-3.43402438170544	0.191352289698421
AFAP1L2	1	1	0.261304211548651	-1.89914138934821		CLIC1	2	1	1.03108556263813	3.57267455436975		ECH1	3	2	-3.91280918128124	2.90415787377149		SBNO2	4	3	4.21556861393818	3.18829248525888		TRIM33	5	4	-2.94761185652844	0.224436682246029
AFF1	1	1	-0.537569809027826	1.87598375656396		CLNS1A	2	1	2.03857381337055	2.89628386177808		EEF1G	3	2	-3.64091889865032	2.14520214178353		SCAMP4	4	3	4.29852731221088	3.19339902379304		TRIM62	5	4	-3.14518420703045	-0.0956757845661049
AFF2	1	1	0.643410754135932	-1.87721880099982		CLOCK	2	1	1.25953729145893	1.82175622560769		EHMT1	3	2	-2.21961964971653	2.60893109121114		SF3A2	4	3	4.27251918309101	3.21386150696069		UBE4B	5	4	-3.39771621234051	0.0572163281658287
AFF3	1	1	0.940595221451606	-1.0682590784809		CLPB	2	1	2.08345038884052	3.02463341929704		EIF3K	3	2	-3.84083776480785	2.88971045293599		SH3GL1	4	3	4.24019153111347	3.21371672727853		VPS13D	5	4	-3.25232951647869	0.0276683984020347
AGAP2	1	1	2.48547275059589	-0.767474252202213		CLYBL	2	1	-1.60419439084164	3.59723625757486		EML2	3	2	-3.91506247527233	2.87180827238351		SLC27A1	4	3	3.78439385884174	3.29407505371362		VWA1	5	4	-2.8532792807304	-0.180892306782902
AGBL1	1	1	-0.106692481108819	-4.22676857135504		CNNM3	2	1	0.463833641938056	2.12060229160577		ERCC1	3	2	-3.80918757922283	2.80429931410342		SPPL2B	4	3	4.2662525891579	3.21294293978006		WDTC1	5	4	-3.36921195990673	0.0521377740123863
AGBL4	1	1	-2.35682122714153	-2.28150089404792		COMMD1	2	1	0.532636952332343	2.08065966942102		ETV2	3	2	-3.85927610404125	2.85116967239171		SSBP4	4	3	4.29860265248188	3.13165820815355		ZBTB17	5	4	-3.46642272479168	-0.04598386905402
AGXT	1	1	-0.752275037833368	-0.99047382495612		CPD	2	1	-0.32974390990368	3.43242869951516		EXD3	3	2	-2.4066853702747	2.29928137042314		STK11	4	3	4.26935250752338	3.20374320127755		ZBTB40	5	4	-3.18808906085125	0.103261393091976
AHNAK2	1	1	1.35705406659016	0.138694685480892		CPT1A	2	1	2.11311776631245	3.0149671850422		EZH2	3	2	-2.79473422772518	1.14088420250207		STX10	4	3	4.00175673954853	3.39003340580255		ZDHHC18	5	4	-3.42364554411999	0.0230795560100669
AIF1L	1	1	1.25757796757587	-0.974887210347355		CREB1	2	1	0.209134173325385	2.41976062633783		FAM102A	3	2	-2.17381382293335	2.63692062028438		TCF3	4	3	4.25796468251118	3.21433417179376		ZMYM6	5	4	-3.27709953791729	0.247680347941219
AIRE	1	1	1.13919527523884	-1.21387608669013		CRYL1	2	1	-1.61491354114643	3.59984783508569		FAM120A	3	2	-2.09670707888237	2.58410680719405		TECR	4	3	3.96134717457661	3.36035637237817		ZNF362	5	4	-3.44145481593243	0.0557009396770591
AJAP1	1	1	0.92068059437641	-1.64924057147712		CSNK1D	2	1	-0.568843531676446	4.42837826587945		FAM166A	3	2	-2.61308919198147	2.13968239404947		THOP1	4	3	4.24732644551166	3.26582584955484
AK5	1	1	1.35990006916889	-2.64562233112067		CTDSP1	2	1	0.218770337036933	2.58054700174123		FANCC	3	2	-2.22269070453278	2.5395302740553		TMEM205	4	3	3.8118224858559	3.23335347749978
AK7	1	1	-2.35325239903561	-2.36486490390509		CUEDC1	2	1	-0.478786873885308	3.96654753067285		FBXO31	3	2	-4.12030618197552	1.42376927711755		TNPO2	4	3	4.07705647938618	3.38668577053338
AKAP6	1	1	0.366933894089545	-3.76457508228034		CYB561	2	1	-0.36065964705578	4.20303444244653		FCGRT	3	2	-3.76170699603191	2.81236719765454		TRIP10	4	3	4.16023595326313	3.16476501204759
AKNA	1	1	2.57151467793354	-0.743249255635441		CYTH1	2	1	-0.556015420027887	4.41140214779168		FHOD1	3	2	-3.9419160366737	1.47421841003686		UPF1	4	3	4.06060988896259	3.40424100734979
AKNAD1	1	1	0.305041146210517	-1.31938369891852		D2HGDH	2	1	0.0385344743049991	2.55001298763543		FIZ1	3	2	-3.88148515231243	2.88989397563726		VMAC	4	3	4.27560241215595	3.15917719580918
AKR1B1	1	1	-1.70070116526714	-0.933907586552799		DAGLA	2	1	2.06488282673725	3.57316426613122		FNBP1	3	2	-2.33090944892994	2.64137772896081		WDR18	4	3	4.28537137501606	3.19561682321817
AKR1D1	1	1	-0.479282426901971	-1.12511165759772		DCAKD	2	1	-0.324878859587823	3.9359335122326		FOXM1	3	2	-2.8044865608894	1.17030755855828		WIZ	4	3	4.0301481007851	3.37257299997598
AKT3	1	1	1.12610537999042	-3.0171652617237		DCPS	2	1	2.06604535572895	2.95179608144551		FTO	3	2	-4.23218481547466	1.3791582999447		ZBTB7A	4	3	4.23797709935078	3.19616155006677
ALCAM	1	1	0.552424502304877	-2.88188274524421		DCUN1D2	2	1	-1.65367563373676	3.66216496803552		FXN	3	2	-2.21013741500012	2.52855464496404		ZNF627	4	3	3.98262364857563	3.41086975910455
ALDH1A1	1	1	-0.339152264662896	-0.88881047389716		DDAH2	2	1	1.0727256058968	3.67709807731897		GABBR1	3	2	-3.1841480017387	1.75272230484277		ZNF653	4	3	4.03444440358051	3.31576405145913
ALDH1A2	1	1	0.887090277603949	-1.72147710941047		DDB1	2	1	2.11012799733051	3.04646365024835		GALNS	3	2	-4.16320984370342	1.39582626201898
ALDH1A3	1	1	0.589796376160468	-0.144865113713444		DDX10	2	1	2.01179893010029	2.90578573622495		GALT	3	2	-2.41163949973217	2.07731650450021
ALDH1L1	1	1	0.477334332398261	-0.431322175481022		DEAF1	2	1	1.86159546368488	2.53653128125459		GARNL3	3	2	-2.29707660085789	2.58585565217525
ALDH2	1	1	-0.356512236663018	-1.12966807506293		DENND1B	2	1	1.498326611451	1.70236198284417		GAS8	3	2	-4.13692109591595	1.39528254844934
ALDH3B1	1	1	-0.00846354968181728	-0.289487201192081		DGKD	2	1	0.118136477402533	2.51976719178945		GFOD2	3	2	-4.13392846591107	1.37959448673516
ALDH4A1	1	1	-0.803992080756341	-0.581912118413151		DGKH	2	1	1.36289365284809	1.73610107280999		GLG1	3	2	-4.20549623973004	1.3875286994198
ALDOA	1	1	-2.39846919781796	-0.925008374669254		DGKZ	2	1	1.97329003804096	2.57572684862405		GNAQ	3	2	-2.05992822281352	2.65309960447937
ALK	1	1	1.653449368409	-1.48439653537482		DHX8	2	1	-0.280151057311212	3.82043997623712		GOLGA2	3	2	-2.12631403214565	2.59023798682481
ALPK2	1	1	1.76629550450214	-2.92570360324591		DIS3L2	2	1	0.195480656555976	2.54158489086419		GPR107	3	2	-2.22340056604973	2.53034345485955
ALPK3	1	1	-0.0483426333152401	-3.94389732501715		DNAJC15	2	1	-1.63967098600498	3.60961405613214		GRAMD1A	3	2	-3.70188300616375	2.91003355064183
ALPL	1	1	0.921727728775824	-1.69129951617926		DNAJC4	2	1	2.17828996174702	3.11794502713472		GTF3C5	3	2	-2.26535119421116	2.52816581406385
ALX4	1	1	0.463539433411444	-1.46614320895881		DNAJC7	2	1	-0.444378066130792	4.00670139171869		GYS1	3	2	-3.92584483630291	2.91801084258348
AMMECR1	1	1	1.25948150151142	0.128740471384823		DNMT3A	2	1	0.581777882508124	2.25436962821275		HNRNPL	3	2	-3.89172832972637	2.85996159591466
AMN1	1	1	-1.81304352290264	0.338269156000912		DNPEP	2	1	0.205673050812567	2.4778355775097		IL11RA	3	2	-2.60394566065899	1.98890743829995
AMOT	1	1	1.31116588108906	-0.201846677281559		DOCK9	2	1	-1.63736088878742	3.62321619369775		INVS	3	2	-2.18758343464962	2.53440974333078
AMPD3	1	1	2.895951819352	-1.25919254443854		DPP3	2	1	2.24638564579853	3.14647699572831		ITFG1	3	2	-4.23978202349774	1.29979268886834
AMPH	1	1	1.47426397793659	-3.01373870990485		DTNB	2	1	0.703047108582343	2.03940461256295		ITPKC	3	2	-3.6744188547813	2.79041117855102
AMZ1	1	1	0.801276516846503	-2.60875852725714		DTNBP1	2	1	1.07611997120746	3.66463051416665		KANK1	3	2	-1.74767177111736	2.23311365821153
ANGPT4	1	1	2.20356137745746	-2.23460157535285		DUSP22	2	1	1.12149794094929	3.70278159954339		KDM4C	3	2	-1.82694274491898	2.31896043994218
ANK1	1	1	-0.223380017348443	-4.00385244510382		DUSP28	2	1	0.184627127579535	2.55035994627267		KIAA0355	3	2	-3.87516396052471	2.9289836851576
ANK2	1	1	0.981980395249213	-2.8685098471424		E2F3	2	1	1.09399921887287	3.66157303430825		KIAA0513	3	2	-4.0544363737785	1.26406173088342
ANK3	1	1	0.398093056610907	0.925523918650448		EHBP1	2	1	0.419650149277533	2.26767535187989		KIAA2026	3	2	-1.90552456236712	2.36177707888871
ANKFN1	1	1	-0.273357200690423	-2.67596204898566		EHBP1L1	2	1	2.11601455204853	2.84199998953134		KIFC3	3	2	-3.72418992526165	1.51444212772638
ANKH	1	1	0.565798592499579	0.328895729563534		EHD1	2	1	2.18317372792133	3.16857693769723		LCAT	3	2	-3.59243743426434	1.53723255970269
ANKMY2	1	1	-0.773116040297662	1.16606323101312		EHMT2	2	1	1.08815009587177	3.67639164306909		LCN12	3	2	-2.28756653077236	1.90279899217874
ANKRD23	1	1	-0.119448113509332	-4.20397480151862		ELF1	2	1	-1.65561093694798	3.61323807813913		LENG8	3	2	-3.24693374640576	1.8645930705288
ANKRD29	1	1	0.828675579956855	-0.697850781895817		ELK3	2	1	1.25274975293049	1.81474034168512		LIG1	3	2	-3.88724701411358	2.77110758104116
ANKRD55	1	1	2.06995065205463	-1.23509438655585		EML3	2	1	2.14351470463642	3.02119435050279		LRRC8A	3	2	-2.17254109985462	2.53522850253373
ANKS1B	1	1	0.353317809037055	-2.44234617374152		EPB41L5	2	1	0.539425444535102	1.89309690573007		MAMDC4	3	2	-2.50558226115337	2.09362207033426
ANO1	1	1	0.653625559738959	-0.189787465550602		EPC1	2	1	1.18591268055805	2.07746801950723		MAN1B1	3	2	-2.34455268389813	2.44469071604997
ANO2	1	1	2.6440134763039	-2.44980581424445		ERBB2	2	1	-0.209860611029779	3.56272969820291		MAP1LC3B	3	2	-4.14875380999676	1.40037493088037
ANO4	1	1	0.75725514881977	-1.79195554874152		ERN1	2	1	1.29817922108539	1.8331942377308		MAPK8IP3	3	2	-3.46116309172741	1.79621253587991
ANO6	1	1	-1.77318248457543	-0.00338156841009907		ESRRA	2	1	2.2154451131142	3.1378352759102		MAPKAP1	3	2	-2.22106704420677	2.58737697877675
ANO7	1	1	-0.291996288367425	-0.0185097040912514		EXOC2	2	1	1.08694345944294	3.67888061382562		MARK4	3	2	-3.77010159499279	2.83408218302518
ANO9	1	1	0.134741139344062	0.794412416003048		EXOC6B	2	1	1.25619561665424	1.89465395786554		MBOAT7	3	2	-3.8550773144447	2.90543377079755
ANPEP	1	1	-0.930998015471612	-0.70955808780402		EXT2	2	1	1.83818752758869	2.55307899095803		MBTPS1	3	2	-4.18998711115948	1.37223498203546
ANTXR1	1	1	1.89539082043537	-3.40614612720221		FADS1	2	1	0.872777533463324	2.99274487473756		MC1R	3	2	-4.04318373210064	1.34990875103265
ANTXRL	1	1	0.361427378586615	-0.733360845067204		FADS2	2	1	0.772289347580756	3.06301949598581		MED27	3	2	-2.24277618832222	2.4978136388281
ANXA2	1	1	2.19258410923847	0.312655848048031		FAM117A	2	1	-0.406655716963922	3.96575621940881		MMP15	3	2	-4.12139861590496	1.350039404414
ANXA4	1	1	-0.623699116774713	-0.929368096806706		FAM168A	2	1	1.30023558133015	1.94216976740152		MRRF	3	2	-2.18552510745159	2.52209326305181
ANXA6	1	1	1.82006270878681	-0.986470777013004		FAM89B	2	1	2.14657790654072	3.1441851971367		MSH5	3	2	-3.11524872786633	1.82118557073861
AOAH	1	1	3.21856029026874	-1.1411305250904		FANCE	2	1	1.08623845570454	3.69951454975396		MTAP	3	2	-1.63112797147862	2.3167840955475
AOX1	1	1	-0.705621767111932	-1.02047236583442		FARP1	2	1	-1.70965157754055	3.72076432087213		MVD	3	2	-4.01561586863629	1.48135642387658
APBA1	1	1	0.14944298260578	-2.13208683154792		FARP2	2	1	0.208061289719428	2.52681465127259		MXD3	3	2	-2.44241868264309	1.17419640400201
APBA2	1	1	-0.988896894522821	-2.16690452716559		FARS2	2	1	1.11573703282246	3.6933632908085		MYBL2	3	2	-2.79769294268719	1.19038252212793
APBB1	1	1	-0.910497951575433	-1.82835920474738		FASN	2	1	0.33892805569538	3.18377984740525		MYO15B	3	2	-3.17322092063061	1.80379990913659
APBB1IP	1	1	3.2044873952187	-1.07191784999579		FBF1	2	1	-0.329944777556573	3.99989621021539		N4BP1	3	2	-4.21772806651226	1.33384243824273
APBB2	1	1	-0.673782277175103	2.17221860267907		FBXO11	2	1	0.523059916428412	2.22477559425622		NACC2	3	2	-2.14888939566246	2.50901250221521
APC2	1	1	-0.957520651885186	-2.3270960631153		FBXO41	2	1	0.196244788101996	1.76905046083718		NANS	3	2	-2.07138417220942	2.45240617968827
APCDD1L	1	1	1.20600230687031	-2.29126938007087		FER	2	1	1.20372087948688	1.5941263852337		NAPA	3	2	-3.92708926207653	2.95316782274038
APOC3	1	1	-0.655964064665948	-1.08820255420417		FEZ2	2	1	0.487250637940253	2.20874957420617		NCAPD2	3	2	-2.65728925473324	0.961919349215328
APOE	1	1	3.09398419850239	-1.4326868834278		FKBP2	2	1	2.1288333653725	3.02238033392221		NCS1	3	2	-2.24641911990276	2.53121968784124
APOL3	1	1	3.27461869709858	-0.377702313878239		FLOT2	2	1	-0.204383421012079	3.60124502756387		NEK6	3	2	-2.2062431902372	2.60896539368421
APOLD1	1	1	2.68788106434711	0.316090744517147		FMNL2	2	1	0.220905852249945	2.37073386885911		NFX1	3	2	-1.98475730910233	2.40696404554635
APP	1	1	1.22710592739948	-1.56546219012946		FOXK2	2	1	-0.543954539366876	4.38145927765161		NINJ1	3	2	-2.17650960690609	2.55323677935392
APPL2	1	1	-2.15930301255814	-1.48596546059032e-05		FOXO1	2	1	-1.61517344719998	3.57252947666436		NOSIP	3	2	-3.8219596625053	2.85720327176839
AQP6	1	1	0.137711358002509	-1.16645534656256		FOXO4	2	1	-0.338751006194268	2.97684721329004		NOTCH1	3	2	-2.20185882157913	2.48175619222909
ARAP2	1	1	-0.762414383956109	2.29800255276948		FOXP4	2	1	1.03130323880085	3.68536023475915		NOXA1	3	2	-2.3543334484779	2.23167822935373
ARHGAP10	1	1	-0.590662288733636	2.03585569240838		FRS3	2	1	1.02847774021992	3.71143571712762		NPAS1	3	2	-3.80058591372601	2.73703701846987
ARHGAP15	1	1	3.07810981266865	-0.968176919438541		G6PC3	2	1	-0.244039583274041	3.8011963782528		NR1H2	3	2	-3.92305021292797	2.92300362565309
ARHGAP22	1	1	2.8643446683205	-1.29727180621833		GAB2	2	1	2.05354745381245	2.97003940918237		NTN5	3	2	-3.27961878783337	2.11745892145425
ARHGAP23	1	1	0.885877203873481	-0.311759788014591		GALK1	2	1	-0.575863766738092	4.41838495113641		NUP210	3	2	-2.7225876332008	1.12804738857537
ARHGAP24	1	1	-0.363873529502069	-1.08347900531501		GAS6	2	1	-1.61485721475712	3.64377323963433		NUP93	3	2	-4.18296115405193	1.37319127895623
ARHGAP25	1	1	2.73947436802753	-0.984912711598576		GFOD1	2	1	1.2941075085915	1.82804314472467		NUTF2	3	2	-4.18512790209881	1.37835482933313
ARHGAP26	1	1	-0.787102508612787	0.0895411191204185		GIT1	2	1	-0.282518434592401	3.70663170196801		OPA3	3	2	-3.91732041842571	2.88274468161851
ARHGAP27	1	1	1.50788218968281	-0.0550957503101235		GNA13	2	1	-0.413449931212579	4.2535787043789		PAK4	3	2	-3.91215329177014	2.92319859244615
ARHGAP28	1	1	0.441473078659858	-1.63094146869391		GOSR2	2	1	-0.352343487807428	3.97406260349542		PBX3	3	2	-1.84940278834931	2.38111360051423
ARHGAP31	1	1	2.51618344776996	-2.13618238589972		GPD2	2	1	0.217917990616645	2.39251659490853		PHF19	3	2	-2.40090091831318	1.73533139803201
ARHGAP4	1	1	2.40790708058246	-0.922067004658878		GPR137	2	1	2.20617587559589	3.10389162280351		PHF2	3	2	-2.1290066272699	2.61532334663659
ARHGAP42	1	1	-0.450741815634881	0.70194093563348		GPR157	2	1	1.22131116383442	1.74731753446847		PHKB	3	2	-4.16647641665569	1.30452625133783
ARHGAP6	1	1	0.637272667816962	-1.72652967593879		GRB2	2	1	-0.446020650931512	4.2863471923092		PHLDB3	3	2	-3.75321905619732	2.74936186947614
ARHGAP8	1	1	0.506570172242011	0.834487002871334		GRTP1	2	1	-1.59878285534016	3.57825825788766		PHPT1	3	2	-2.19007882780663	2.50287855841905
ARHGDIG	1	1	-0.985463905402337	-2.30766733310431		GTDC1	2	1	-0.0325510979377377	2.36852319218904		PKMYT1	3	2	-2.84675406224362	1.21135012485772
ARHGEF10L	1	1	0.355357479981269	-0.0852075400134926		HDAC4	2	1	0.022296500138129	2.60996970959693		PKN3	3	2	-2.42948334223858	1.70838234998971
ARHGEF16	1	1	0.222460341385688	0.84551946499139		HDAC5	2	1	-0.375072884627496	3.11885122635156		PLA2G15	3	2	-4.17896454341045	1.36562184669763
ARHGEF2	1	1	2.19520146839985	1.21466414310723		HDLBP	2	1	0.242365431717719	2.50466818787843		PLCXD1	3	2	-2.83727257258526	1.2449196992138
ARHGEF37	1	1	-1.16199498183361	1.3032236514309		HEATR6	2	1	-0.370420742102777	4.22617511131555		PNKP	3	2	-3.93139450556866	2.90201258339673
ARHGEF4	1	1	0.81025202267536	-1.42282302997321		HELZ	2	1	-0.425514745780145	4.25479463913232		PNPLA7	3	2	-2.51267378337017	2.04421989300042
ARHGEF6	1	1	3.13947923176655	-1.04188092372626		HEXIM2	2	1	-0.168672013350641	3.59307758190423		POC1A	3	2	-2.81660048968426	1.14397827961236
ARID2	1	1	-2.16498075730435	0.143128078959286		HGS	2	1	-0.569698619910394	4.4228035626629		POLA2	3	2	-2.5448235750877	1.3217201647976
ARID4B	1	1	2.2201648473061	1.41755573131829		HIBCH	2	1	0.178293776444281	2.50338184513837		POLD1	3	2	-3.9408903599464	2.791550253115
ARID5A	1	1	2.69724566929706	0.524341743967831		HIPK3	2	1	1.32269318097004	1.92787639477044		POMT1	3	2	-2.26968185908428	2.53655917622834
ARL15	1	1	-1.64254780418507	1.25060920097619		HIVEP1	2	1	1.11338574879536	3.5569206295231		PPP1R12C	3	2	-3.86186199195019	2.82610925712377
ARL8A	1	1	2.28760201924213	1.33882884361535		HLCS	2	1	0.751908135346259	2.92263927736074		PPP1R13L	3	2	-3.82838730818859	2.83643220045358
ARNT	1	1	2.26726157658466	1.3802260575512		HMGA1	2	1	1.15660221569904	3.72570435383111		PPP5C	3	2	-3.93133287436596	2.87792122044355
ARNTL	1	1	0.0785320519722355	-2.68767030856818		HMGB1	2	1	-1.65786199576489	3.61991367914468		PPP6C	3	2	-2.19092473692528	2.56688183226377
ARRB1	1	1	2.36843926899799	-2.06946809909552		HS1BP3	2	1	0.478976321152533	2.12763075210839		PRDM12	3	2	-2.25990230149857	2.44224638917237
ARRB2	1	1	3.38849122517475	-1.04786260745734		HSD17B12	2	1	1.9293225526131	2.75066211499959		PRMT1	3	2	-3.91425793177715	2.89536426641732
ARSB	1	1	-1.07115976817242	0.915241044543087		HSP90AB1	2	1	1.05864388935932	3.67990909197122		PRRT2	3	2	-3.3104885101997	1.67302982189447
ARSG	1	1	0.290991377762641	-1.88246305606574		IFT88	2	1	-1.61370201713673	3.56789122202188		PSRC1	3	2	-2.80665158040157	1.13399724342614
ARSI	1	1	1.86794764988788	-3.37298353336066		IL6R	2	1	1.4255612611092	1.67817596771508		PTCH1	3	2	-1.75314231521717	2.3683048305729
ASAP2	1	1	-0.470596480437433	0.141428392908871		ILK	2	1	1.85584623806843	2.30095724441796		PTGES2	3	2	-2.236901077696	2.53463297762662
ASAP3	1	1	-0.834256815978204	0.295091074488461		ING1	2	1	-1.67800604111782	3.68271587469369		PTRH1	3	2	-2.293386954137	2.57592925109655
ASCL1	1	1	-0.299783992835199	-2.61905487201423		ING5	2	1	0.184538435868109	2.53316144325525		PTTG1	3	2	-2.71635328538052	1.21198407985955
ASPG	1	1	0.671974253586615	-0.806338864781559		INPP4A	2	1	0.727826666764106	2.03847328998834		PVR	3	2	-3.78839616782299	2.80700391956359
ASPH	1	1	-1.41196070916287	-0.791460353352726		INPPL1	2	1	2.14866454594501	2.97744412400514		QSOX2	3	2	-2.20611130005947	2.4934995142439
ASRGL1	1	1	1.07276756756672	-1.66946418903083		IPMK	2	1	1.31780536167988	1.83999953844339		RAD23B	3	2	-2.10935880548588	2.60616850533277
ASS1	1	1	-0.52689020640484	-1.26417358539313		ITSN1	2	1	0.818820786408271	2.72093242087156		RAD51	3	2	-2.80179219252697	1.18348280765802
ASTN1	1	1	0.0826340436256778	-2.54224022052497		JARID2	2	1	1.07476408474811	3.59867654421121		RALGDS	3	2	-2.20022294230095	2.59187406726867
ASTN2	1	1	-0.301305222579156	-2.3331242384693		KAT5	2	1	2.17973477833637	3.08408291318208		RALGPS1	3	2	-2.25922258503071	2.50647796370774
ATF1	1	1	-2.10283038324944	0.0769375977733726		KCND3	2	1	1.27016837590107	1.60698274948388		RANBP10	3	2	-4.12930839068524	1.37666062691003
ATF3	1	1	2.75494201176533	0.55258004047662		KDM2A	2	1	2.14422996037372	3.0780820665577		RAPGEF1	3	2	-2.22956754572025	2.55986763217241
ATF6	1	1	2.21670157902607	1.4253350911358		KIF13A	2	1	1.09460837834247	3.65533177234918		RBL2	3	2	-4.17674081332317	1.35159830429345
ATG10	1	1	-1.74742259389988	1.28608636238366		KLF7	2	1	1.13674647801288	1.86306486704141		RBMX	3	2	-3.02227811820141	2.17252979852945
ATG9B	1	1	-2.16358152336708	-2.26778610370368		LASP1	2	1	-0.235390234061395	3.6063943920353		RGS3	3	2	-1.9295626685702	2.31500054576188
ATN1	1	1	-1.94822693548432	0.105326097986996		LATS2	2	1	-1.56118454343907	3.42122600652963		RNF38	3	2	-2.02439139343134	2.42652506806642
ATOH8	1	1	1.34246618740925	-1.73398216388434		LCLAT1	2	1	0.498601031235541	2.15319119074136		RPL13	3	2	-3.70611362464062	2.14002374985009
ATOX1	1	1	-1.84912611848942	1.27394346573144		LCOR	2	1	1.34232790463337	1.74121962168008		RPL22	3	2	-3.65522723204723	1.98469511844903
ATP10A	1	1	1.41711814396747	-3.13779743335456		LDLRAD3	2	1	1.21553809636005	1.36420778610498		RPL23A	3	2	-3.66392164237133	2.13335208275109
ATP10B	1	1	0.117654871872748	-0.221231061436832		LIMS1	2	1	1.23111279003986	1.85021243669778		RPL28	3	2	-3.75020389563671	2.3671323178032
ATP11C	1	1	-1.20733414895168	0.321010273478329		LMTK2	2	1	1.25801546566852	1.9345480022648		RPL3	3	2	-3.64276986128918	2.16913376428872
ATP1B1	1	1	0.030832123688544	-0.517646151997746		LPP	2	1	1.29665191166767	1.71222553827554		RPL36	3	2	-3.66763834960095	2.15714178659707
ATP2A1	1	1	-0.136285233565484	-4.19091375491828		LRCH1	2	1	-1.64112516052357	3.6181188640812		RPS2	3	2	-3.70231382853619	2.16114841081887
ATP2A3	1	1	-0.134186434813653	-0.155596095540226		LRP5	2	1	2.07186515324482	3.01770741917878		RPS9	3	2	-3.66738610274426	2.17817090132028
ATP2B1	1	1	-1.89519208229414	-0.0885237040302163		LRRC45	2	1	-0.60977857119671	4.46441213466913		RSPRY1	3	2	-4.10261600024334	1.29408423282891
ATP2B2	1	1	0.309486222199286	-1.40049417636603		LRRC56	2	1	1.98910815709003	2.64064134337693		RUVBL2	3	2	-3.90632550723187	2.91535603680402
ATP2B3	1	1	-0.575830388137017	-2.8542710127613		LRRFIP1	2	1	0.193349671295966	2.55384988763124		RXRA	3	2	-2.20258784598938	2.58683561959058
ATP2B4	1	1	1.53096826069721	0.119692963145077		LRTOMT	2	1	2.24224765293964	3.08110297896653		SAE1	3	2	-3.93074100024334	2.82952326216489
ATP2C2	1	1	0.353176188401068	0.527958553812801		LSS	2	1	0.521651577881659	3.13172502496034		SARS2	3	2	-3.89220802790753	2.94587646105081
ATP6AP1L	1	1	-1.80971080369583	1.51554982044488		LTBP3	2	1	2.09866387837299	2.84539368428975		SEC16A	3	2	-2.24907361275784	2.56795555033475
ATP6V0A4	1	1	0.178434443405951	-1.20813711307257		LYRM4	2	1	1.15426118367084	3.7398680863598		SERTAD3	3	2	-3.74362282759777	2.84708209016114
ATP6V0D2	1	1	2.63904244892963	-1.1898992838642		MACROD1	2	1	2.1947308301247	3.04323447921067		SH3GLB2	3	2	-2.29801841384998	2.46707482316285
ATP6V1B1	1	1	0.146217179230536	-1.18514283321112		MADD	2	1	1.94773252003559	2.63967253693134		SIPA1L3	3	2	-3.86538736827007	2.88700183906347
ATP6V1C2	1	1	0.185083937577094	-1.21512277744025		MAML2	2	1	1.19050819867023	1.91627941705972		SLC12A4	3	2	-3.89396791464916	1.47075108864099
ATP8A2	1	1	0.838022541931952	-2.02760799548835		MAP3K11	2	1	2.16154534809955	3.09099368431359		SLC27A4	3	2	-2.30804468996159	2.63561889954597
ATP8B1	1	1	0.451754403046454	0.865963977358639		MAP3K13	2	1	1.07332975857624	1.61182765342981		SLC9A5	3	2	-3.56575458056561	1.66841046192437
ATP8B3	1	1	-1.29418091780773	-1.823864060857		MAP3K3	2	1	-0.504390287467157	4.35544149257928		SNAPC4	3	2	-2.36763389713398	2.6056951475957
ATP8B4	1	1	3.29785115712055	-1.27639778278083		MAP4K4	2	1	0.489908766678656	2.27912063576966		SPC24	3	2	-2.76978259093395	1.20160893776208
ATP9B	1	1	1.31082947247394	0.798667114756405		MAPK14	2	1	1.04177577488788	3.68387530424386		SPG7	3	2	-4.12953155047527	1.39654306747705
ATRNL1	1	1	0.633615088394965	-1.57289941928595		MARK2	2	1	2.11747081272968	3.08288238622934		SPHK2	3	2	-3.88907747275463	2.89616021194249
ATXN2	1	1	-2.25963260538212	0.0918387589672203		MAST4	2	1	1.23646361821064	1.75150184013635		SPIN1	3	2	-2.16082917458645	2.61462643422872
AUTS2	1	1	-0.151403713294183	0.218205851099789		MBNL2	2	1	-1.63121958381764	3.63432494976312		SPIRE2	3	2	-4.12671535021893	1.36157910206109
AXIN2	1	1	0.937033486298407	-1.04173977992743		MCF2L	2	1	-1.71340208060375	3.6896008072117		SPTAN1	3	2	-1.9826614272528	2.26562951185495
AXL	1	1	2.9298759221352	-1.51378973148078		MED24	2	1	-0.25324039466015	3.63829074480325		SRRM5	3	2	-3.72343270785442	2.69929766288713
B3GALT5	1	1	-0.0393739224158871	-0.611304122426212		MEN1	2	1	2.12502057545551	3.07674877025872		SSPO	3	2	-2.61667202717892	2.05855630018502
B4GALNT3	1	1	0.463150334290351	-0.591647464253605		METTL8	2	1	0.304606747559394	2.37971616961747		ST3GAL2	3	2	-4.13997643000713	1.38529519417077
B4GALT1	1	1	1.55677158825764	0.299312990687191		MGAT5	2	1	1.2300844907082	1.91702101805001		ST6GALNAC4	3	2	-2.04598371244303	2.31960932590753
BAALC	1	1	1.44732553952106	-1.15232833049506		MIPEP	2	1	-1.61571227318874	3.6172113833645		ST6GALNAC6	3	2	-2.1921698928558	2.56419543602258
BACE2	1	1	-0.0192857266151059	0.18799034931451		MLLT6	2	1	-0.218934822150384	3.59206376650125		STMN1	3	2	-2.89548664099804	0.929632347605526
BACH1	1	1	-0.284465360709344	1.68010131695062		MOB2	2	1	1.89084346287617	2.47197755851537		STOM	3	2	-2.07908629185787	2.59400571563035
BACH2	1	1	1.9864161729134	-1.3144908728382		MREG	2	1	0.284034562043036	2.3521131394127		STRBP	3	2	-2.17496556348435	2.58918200858623
BAHCC1	1	1	0.273794722489203	-0.830612737157047		MRPL11	2	1	2.2386966466225	3.17183090426713		STRN4	3	2	-3.93091659552685	2.93250539579183
BAIAP2L1	1	1	0.376501631668891	0.858560007593929		MRPL33	2	1	0.48377497189411	2.17978845217019		STX1B	3	2	-3.32818369872204	1.54635969974786
BAIAP2L2	1	1	-0.796603965827142	-0.703529197194279		MRPS23	2	1	-0.499677944251214	4.31713668682367		STXBP1	3	2	-2.15585241026512	2.32878271915704
BAIAP3	1	1	-2.29932071573368	-2.40488250873298		MRPS9	2	1	0.300323319367255	2.40092856862336		SYMPK	3	2	-3.87500350482098	2.85615621187478
BANK1	1	1	2.24704415791401	-0.987742740132511		MSH6	2	1	0.214853358200873	1.96089069225579		TACC3	3	2	-2.80811684138409	1.20877961494714
BARX2	1	1	0.565446209839667	-0.517863589741886		MSI2	2	1	1.30657060139545	1.94989500620156		TBC1D2	3	2	-2.01566101356677	2.42506320454866
BASP1	1	1	0.961059880188788	-2.10904987476081		MSL1	2	1	-0.211414623328363	3.56010089494973		TCF25	3	2	-4.11168067462078	1.42337707855493
BAZ2A	1	1	-2.21002830869785	0.107200544855892		MTA2	2	1	2.22297008030781	3.17315096833497		TEAD2	3	2	-3.48199002749554	2.78027151205331
BBS7	1	1	-0.569218921729242	2.02997861482888		MTA3	2	1	0.469745945862616	2.19096670725137		TERF2	3	2	-4.23747603900066	1.42182533123285
BBS9	1	1	-0.689490723677789	1.13000492431909		MXRA7	2	1	-0.48780374533764	4.29952673294336		TIMM50	3	2	-3.87574319846264	2.90676976420671
BCAR3	1	1	0.0277691602028263	-0.480085689046085		MYO18A	2	1	-0.298303294249688	3.70570914127618		TJP2	3	2	-2.17972064323059	2.47862068989068
BCAS1	1	1	-0.0578510046683895	-0.163308221318424		NADSYN1	2	1	2.24867207997211	3.16213102319032		TK1	3	2	-2.78729753501049	1.20739654876977
BCAS4	1	1	2.50566632740864	-1.03280695102423		NAGK	2	1	0.459973883560981	1.77465800621301		TK2	3	2	-4.14939467913738	1.38910691120416
BCAT1	1	1	2.97648532383808	-1.44086416385382		NAGLU	2	1	-0.174593854018365	3.82972113468438		TMEM8B	3	2	-2.32317196137539	2.49512570776731
BCL11A	1	1	1.26759417050251	-0.418454009511173		NARS2	2	1	2.04772574894794	2.98115138389856		TP73	3	2	-2.68126105076901	1.07611195423394
BCL11B	1	1	2.46746737950214	-0.724324780919254		NBAS	2	1	0.512229752472724	2.20366559603006		TPRN	3	2	-2.21628809280029	2.54529168882161
BCL2	1	1	1.17431075566181	0.550314587137997		NCK2	2	1	0.427672934464301	1.92360876180917		TRADD	3	2	-4.1023883105003	1.38701264240533
BCL2L14	1	1	0.332016539505805	0.213992041132748		NCOA1	2	1	0.548256945542182	2.19454614498407		TRAF2	3	2	-2.23680779642693	2.55360857822686
BCL3	1	1	2.43294436924824	0.502480906031429		NCOA2	2	1	1.33943946354755	1.90669648029596		TRIM14	3	2	-1.62381162054173	2.14370111801416
BCL6	1	1	2.27100236409077	-0.0900314631244545		NDUFA10	2	1	0.184199643067206	2.47935093619615		TRPM4	3	2	-3.89443736083141	2.81887734361678
BCL7A	1	1	-2.29388965971104	0.041082781336605		NEK8	2	1	-0.164958763190423	3.67524800874978		TTLL11	3	2	-2.1962924034082	2.51384596206933
BCL9	1	1	2.25605304234394	1.29400984623223		NF1	2	1	-0.297417330809747	3.69778321363717		TTLL3	3	2	-3.15459089285961	1.77747283556253
BDKRB2	1	1	1.99482257359394	-2.07922800204963		NFATC2	2	1	1.37276561253437	1.70624999382287		U2AF1L4	3	2	-3.84739379889599	2.8625025568226
BEGAIN	1	1	-1.11090950972668	-2.22177465579718		NFE2L1	2	1	-0.292133140631829	4.02980975487024		U2AF2	3	2	-3.94545869834057	2.91994696535855
BEST1	1	1	1.97705872052082	-1.64572246692389		NFE2L2	2	1	0.285960745743598	2.34858674981385		USF2	3	2	-3.89571826464764	2.91861200012952
BFSP1	1	1	-1.18465648896328	-0.495650369145573		NFKBIE	2	1	1.08217604153522	3.59662882663995		USP10	3	2	-4.17431561953655	1.38626293518335
BFSP2	1	1	2.18805510990986	-1.12394841335028		NFYA	2	1	1.04432756894001	3.64546076633722		USP20	3	2	-2.25579457289806	2.54452293791562
BGN	1	1	2.03411443226704	-3.47122963092536		NHEJ1	2	1	0.270010304383124	2.44233505108148		VAC14	3	2	-4.1660565615379	1.3430449185589
BHLHE40	1	1	2.66463811390766	0.614855688593685		NMT1	2	1	-0.295156049796258	3.84099141933709		VASP	3	2	-3.81449549204937	2.91238709964544
BICC1	1	1	1.38933045857319	-3.1298738302967		NPLOC4	2	1	-0.508142399855767	4.38521258213311		VAV2	3	2	-2.29993434555164	2.6116703344205
BICD1	1	1	1.00071485035786	1.22086016514093		NQO2	2	1	1.14158303730854	3.68460587837487		WDR27	3	2	-3.1356541395866	1.83508960583001
BIK	1	1	0.523128342560614	0.791189712069332		NR6A1	2	1	0.828800511292304	1.48885099270135		WDR5	3	2	-2.24495901472202	2.57204964437276
BIN1	1	1	-0.140992093154107	-4.02400024554938		NUCB2	2	1	1.67468292706379	2.56774072029382		WWOX	3	2	-4.20930116183392	1.40204552986413
BIRC7	1	1	1.94774920933613	-1.62917621753424		NUDT22	2	1	2.25281484120258	3.19051186420709		WWP2	3	2	-4.17378323084942	1.35747269966394
BLVRA	1	1	-0.857126283713495	1.1959832129696		NUDT8	2	1	2.15762288563618	3.1406996069172		YIF1B	3	2	-3.91153388030163	2.90893914975911
BMP4	1	1	0.924766373566474	-0.990119773366154		NUMA1	2	1	2.12957961552509	3.01162232138902		ZBTB45	3	2	-3.82022230631939	2.84867436864167
BMP5	1	1	1.3713665723122	-1.97532518527716		OSBPL5	2	1	1.73252041333088	2.3695617435196		ZC3H18	3	2	-4.14994423396221	1.39660267212182
BMP7	1	1	0.788694691590155	-1.80986555240363		OTUB1	2	1	2.1718078374184	3.1117829201439		ZC3H4	3	2	-3.83937780863873	2.84225678124219
BMP8A	1	1	1.65745098584064	-3.4408279242298		PACS1	2	1	2.19520146839985	3.03019483067781		ZCCHC14	3	2	-4.18824570185772	1.40996913292199
BMPER	1	1	0.628187251023139	-2.46494253299445		PACSIN3	2	1	1.30092437260517	2.66964443825871		ZDHHC7	3	2	-4.1427194357597	1.35506193020135
BMPR1B	1	1	0.425955367020453	-1.33789880893439		PARD3B	2	1	1.28998453610309	1.77823380806237		ZFHX3	3	2	-4.14540617472759	1.35880081035882
BNC2	1	1	1.64233620159992	-3.34477193973273		PARP4	2	1	-1.6836806119167	3.66809235193521		ZMYND19	3	2	-2.24381107396713	2.51636956312448
BOC	1	1	1.39100010388264	-2.69707210681647		PARVA	2	1	1.81223566525349	2.3740903256157		ZNF19	3	2	-4.20408742434612	1.3533295808056
BOK	1	1	-0.601447153159295	-1.69679172656745		PCCA	2	1	-1.63372488624683	3.64821581222802		ZNF219	3	2	-3.4592158079826	2.33593760111123
BOLA1	1	1	2.26719243519672	1.3823845801571		PCGF1	2	1	0.485726666382636	2.18595628120691		ZNF382	3	2	-2.8045971871101	2.61908969708472
BPI	1	1	1.3430052518166	-1.75398834369391		PCGF2	2	1	-0.247183966704522	3.6352652726391		ZNF415	3	2	-2.87553446299664	2.62244677223951
BRS3	1	1	-0.573354053565179	-2.46534879825324		PCNT	2	1	0.817383599213446	2.9273700831154		ZNF444	3	2	-3.84737758643261	2.91981659509927
BRSK2	1	1	-1.01386277682415	-2.36642845294684		PCSK7	2	1	2.19607264988788	3.17157070019036		ZNF526	3	2	-3.79846482283703	2.83838174917489
BSN	1	1	-0.896122503348504	-2.64960725925177		PCTP	2	1	-0.39439611441723	4.21344069816858		ZNF552	3	2	-3.17722384936443	2.53109186568052
BTBD11	1	1	-1.45909874446026	-1.07565935275763		PCYT2	2	1	-0.59588377482525	4.42597083427697		ZNF581	3	2	-3.72858684069744	2.40869961359292
BTBD16	1	1	-0.763478922911798	-1.34050520084113		PDE4A	2	1	-0.0465296984397519	2.21048675157815		ZNF586	3	2	-3.15937094695202	2.5367928115347
BZW2	1	1	-0.792311954566156	1.26371411659509		PDIA6	2	1	0.563476872376288	2.27556980826646		ZNF628	3	2	-3.63278739459149	2.60809264757425
C10orf90	1	1	1.57413156025776	-1.90301378390998		PDK2	2	1	-0.355249095030938	3.96119920589715		ZNF787	3	2	-3.81817107207409	2.84982067026883
C12orf49	1	1	-1.11716251380077	0.346929710886776		PDS5B	2	1	-1.63644497401348	3.59839991905481		ZNRF1	3	2	-4.15589563853375	1.38198391773492
C12orf60	1	1	-1.88577013022534	0.699004810831844		PECR	2	1	0.248987030915107	2.34610698797494
C12orf75	1	1	-0.769681382247125	-0.631898957707584		PER2	2	1	0.187119316986884	2.50099996902734
C14orf132	1	1	0.566726517609442	-2.88013704440802		PFKL	2	1	0.639855933121527	3.01007134892732
C14orf180	1	1	1.71677238934406	-2.33624752185553		PGAP3	2	1	-0.210817742415582	3.61103902437478
C16orf74	1	1	0.720840525559272	-0.49275859019965		PGS1	2	1	-0.630890059538995	4.44999305584222
C17orf64	1	1	-1.02226041562191	-1.64710243365973		PHF12	2	1	-0.261044192382013	3.69132433512002
C17orf67	1	1	0.08697493069538	1.19682912208825		PIP4K2B	2	1	-0.263899016448175	3.65669981815606
C17orf82	1	1	2.17178351872333	-1.80392606876105		PITPNM1	2	1	2.21614367955097	3.1499589798668
C17orf99	1	1	1.36499412052997	-1.24863417766303		PKP4	2	1	0.203694176606025	2.42673156835824
C18orf25	1	1	1.28553850644001	0.844476145289242		PLCB3	2	1	2.23217732899555	3.18240852334291
C19orf33	1	1	0.561470580033149	0.681435030482113		PLEKHB2	2	1	0.0459221123970401	2.457186725519
C1orf105	1	1	-0.172110128470575	-4.21982439182013		PLEKHH3	2	1	-0.274950075217401	3.59191868879586
C1orf127	1	1	-0.554611611434137	-2.49795206210822		PLEKHM1	2	1	-0.334323930808221	3.92633036949426
C1orf198	1	1	2.23397309773334	1.29576448776513		PLEKHM3	2	1	0.323989701203192	2.4420609889248
C1orf21	1	1	-0.036984014578973	-0.298633653142155		PNKD	2	1	0.193033766678656	2.3391212342003
C1QTNF1	1	1	2.0483594655312	-3.51497467181891		PNMT	2	1	-0.173320460387384	3.50289301254541
C1QTNF6	1	1	2.18850286000141	-3.64766653201789		POLD3	2	1	2.1722002743996	3.13475165941507
C1QTNF7	1	1	1.77700002186664	-3.11442144534797		POLR2L	2	1	1.90806539051899	2.36521236278802
C2	1	1	3.24458701603779	-1.11459835193366		PPARD	2	1	1.06439502232441	3.66752986290246
C20orf194	1	1	-2.32099314338795	-1.42996557376593		PPARGC1B	2	1	1.22536690228351	1.68040243961602
C22orf34	1	1	2.66235311024555	-0.932984429814518		PPM1B	2	1	0.488425564698066	2.26623521425515
C2CD4C	1	1	-1.10083489424816	-2.2284427466175		PPM1D	2	1	-0.440648484297906	4.31954590656549
C2CD4D	1	1	-0.650662946768914	-1.44314010760993		PPM1G	2	1	0.473870348862494	2.14539758541375
C2orf88	1	1	1.08495862477192	-1.89905555865973		PPP1CA	2	1	2.1759491681374	3.11176286318093
C3orf52	1	1	-0.174078512259637	0.477216166041195		PPP1R14B	2	1	2.20594699375996	3.15622828581124
C3orf67	1	1	-2.13240751928917	-2.08947809360236		PPP1R9B	2	1	-0.414630818434869	4.06133155205041
C4orf19	1	1	0.0819144963539493	-0.472853738286198		PPP2R5B	2	1	2.19946725361713	3.18571222998887
C4orf36	1	1	-0.529902386733209	1.94335256197244		PRDM11	2	1	1.42726523869404	2.06598113157541
C4orf50	1	1	2.23211152546772	-0.86861308238715		PRIM2	2	1	1.06168634884724	3.60087696888238
C6orf132	1	1	0.69486124508747	0.854197305224239		PRKAR1A	2	1	-0.434090662070428	4.2780476031521
C7orf50	1	1	-0.767749118872796	1.23154143669397		PRPSAP1	2	1	-0.564528393813287	4.32248095848352
C8G	1	1	-0.640734362670099	-1.10440619609565		PRX	2	1	0.513279986313666	1.62049500324517
C8orf34	1	1	-2.31770949370495	-2.42013080737799		PSMA1	2	1	1.93155701153644	2.666120950661
C9orf139	1	1	2.80976588719257	-0.855232316472233		PSMG4	2	1	1.11604292385944	3.68872581102639
C9orf50	1	1	-1.10768018967739	0.00340763904839703		PTDSS2	2	1	1.91549141400226	2.5126990345934
CA10	1	1	0.215336394242133	-2.14405162952155		PTK7	2	1	0.989849877289618	3.3933606562832
CA11	1	1	-1.51920353180996	-1.74415310046881		PTMA	2	1	0.188429427079047	2.48618119635373
CA12	1	1	-0.330521154471551	-0.727345544316471		PTPN14	2	1	1.33698518269428	1.82399128057748
CA4	1	1	2.17300469868549	-2.23850830219001		PTPN4	2	1	1.30457050793537	1.85985968687326
CA5B	1	1	-1.21281700141064	0.284061354182064		QRICH2	2	1	-0.518092918463861	4.30017868854791
CABLES1	1	1	1.71712262623676	-1.61301906726569		RAB11FIP5	2	1	0.179266762665595	1.8258215604046
CACHD1	1	1	1.17811090939411	-1.59199531696051		RAB20	2	1	-1.71135683662525	3.6926953015545
CACNA1A	1	1	-0.740533876486932	-2.63983829639167		RAB30	2	1	1.35657079213032	1.9749709782818
CACNA1B	1	1	-0.861526656218683	-2.40024049899787		RAB5C	2	1	-0.288478303023492	3.77158479072839
CACNA1C	1	1	0.957226586273993	-3.7707634749195		RABGAP1L	2	1	1.66231925480732	1.6872797427395
CACNA1D	1	1	-0.534176397391473	0.042873781702816		RAD54L2	2	1	1.28949744694599	1.72824804165155
CACNA1E	1	1	-0.211872863837396	-1.72503526828498		RAD9A	2	1	2.22180516713032	3.15349231340676
CACNA1G	1	1	1.28309400074848	-2.71279533527106		RALB	2	1	0.435182166031684	2.21455563285142
CACNA1H	1	1	0.872986149720038	-3.69634254596442		RALGAPA2	2	1	1.28273375027546	1.85046146490365
CACNA1I	1	1	-0.18379561907879	-1.95801885745734		RARA	2	1	-0.199855136939203	3.56583390810281
CACNA1S	1	1	-0.14688520438305	-4.21431835315436		RASA3	2	1	-1.44856034524075	3.38611863233834
CACNA2D1	1	1	0.808301520279731	-2.9378195585987		RASSF3	2	1	1.20749886029133	1.93751810171395
CACNA2D2	1	1	0.722620320252265	-1.53824766299933		RASSF7	2	1	1.86185152523884	2.41277758457452
CACNA2D3	1	1	0.804283451966132	-1.87366684100837		RB1	2	1	-1.6339038789951	3.59854499676019
CACNA2D4	1	1	2.92217690937885	-1.54512746951789		RBMS1	2	1	0.310167622498358	2.39795450546533
CACNB2	1	1	0.763908934525336	-3.72224720142096		RCN1	2	1	1.8083737611092	2.57083494641572
CACNG2	1	1	-0.519508886405145	-2.88415439746589		RDX	2	1	1.28572804921039	2.65230111830622
CACNG4	1	1	0.12242586605915	-2.08702524326056		RECQL5	2	1	-0.489859628745233	4.31255738117486
CACNG8	1	1	-0.363938975402032	-2.88504274509162		REL	2	1	1.32489521496662	1.79572181083947
CADM1	1	1	1.35456187718281	-1.92318733356208		RELA	2	1	2.17466838353046	3.08897195436746
CADM2	1	1	0.0513687848366153	-2.7928319754383		REST	2	1	1.25907976620563	1.88071916677743
CADPS	1	1	-0.645172524520074	-2.52536256931037		RFX3	2	1	1.30319077961811	1.77622000553399
CADPS2	1	1	-0.284842062064325	0.00276510097771832		RHBDF2	2	1	-0.37876038558117	4.18656651356012
CALCB	1	1	-0.0906358242713559	-2.49542291782111		RHOQ	2	1	0.445183110169257	2.1983932075718
CALD1	1	1	0.916299176148261	-3.8177753271839		RNASEH2B	2	1	-1.63386287099949	3.61164925672799
CALML5	1	1	1.06722981922993	-0.229357081868351		RNF214	2	1	1.96747882359394	2.88503156282693
CALN1	1	1	-0.107068586417352	-2.65661676547736		RNPEPL1	2	1	0.212882828644599	2.50683021225721
CAMK1D	1	1	0.369934630326117	-1.08220370433539		RPS6KB1	2	1	-0.436610031195794	4.27657536842614
CAMK2A	1	1	-0.0558785677634823	-3.92973907611579		RPS6KB2	2	1	2.15847213261494	3.09173841454774
CAMK2B	1	1	-0.202858376570855	-4.10645397327155		RPTOR	2	1	-0.491136360236322	4.34851650573999
CAMK2D	1	1	-0.522858786650811	1.88289306738168		RREB1	2	1	1.29303104870685	2.11534230091363
CAND2	1	1	-0.966746020384942	-2.11730869434089		RTN4	2	1	0.429233145645942	2.26342229225427
CAP2	1	1	0.564253640107001	-3.81466730258673		RXRB	2	1	1.06358344548115	3.66171805240899
CAPG	1	1	2.56111915104755	-0.9967099013111		SAP30BP	2	1	-0.507281112738763	4.35999266483575
CAPN13	1	1	0.0847385644234073	0.0983630833843345		SBF2	2	1	2.03869731419453	2.92601981439382
CAPN2	1	1	2.28724009983906	1.23829273559838		SCD	2	1	0.629093480042304	3.10376916506082
CAPN5	1	1	-0.0701873779975521	-0.291330892064274		SCYL1	2	1	2.13036735051044	3.0455586431244
CARD10	1	1	-1.00349681384197	-0.5537327112934		SEC14L1	2	1	-0.624947476454889	4.44604114868432
CARD11	1	1	2.36170060627827	-0.649636823155582		SEMA4C	2	1	0.666848254135932	2.0904739914158
CARD9	1	1	3.14483220570454	-1.16450317523688		SERGEF	2	1	1.85251648419269	2.56099496462136
CARNS1	1	1	-0.614683795043145	-1.90745647571296		SERINC5	2	1	1.26276071064838	1.88703845121652
CASQ2	1	1	0.500467848709906	-3.85675867221564		SERTAD2	2	1	0.518370938233222	2.25311509945184
CASS4	1	1	3.16696221821674	-1.05573018214911		SF1	2	1	2.18797118657001	3.10832376458436
CAST	1	1	-1.73619379407993	1.25373689510614		SF3B2	2	1	2.17153890126118	3.09130178072244
CAV2	1	1	2.13496644490131	-1.80401142261237		SFMBT2	2	1	1.42628939144977	1.59096316673547
CAV3	1	1	-0.138979721137201	-4.22603424213141		SH3BP4	2	1	0.372459006241645	2.00642595865518
CBFA2T3	1	1	2.20325953953632	-0.84845288417548		SIGIRR	2	1	1.97396571629413	2.60780320741922
CBR4	1	1	-0.620595622130548	2.04204086639672		SIK2	2	1	1.90044648640522	2.82643633761197
CC2D2A	1	1	-2.33972330696217	-2.30080707690924		SIPA1	2	1	2.16164500706562	3.05727271415979
CCBE1	1	1	0.701776575974311	-1.74806125781745		SKA2	2	1	-0.452209281989251	4.16009525635034
CCDC102B	1	1	2.77216489308246	-2.3609939398548		SLC19A1	2	1	0.526893210343207	3.07595674373895
CCDC114	1	1	-2.30146228081814	-2.40929659030646		SLC25A10	2	1	-0.579099702902948	4.40303747036248
CCDC13	1	1	-2.29762958294979	-2.36158664844245		SLC25A12	2	1	0.0900409936226261	2.37528074958116
CCDC148	1	1	-2.26225258714787	-2.12722166202277		SLC29A1	2	1	1.05009133808979	3.6728166160801
CCDC151	1	1	-2.28479446775547	-2.41540487430304		SLC38A10	2	1	-0.576002883978997	4.42737452366143
CCDC155	1	1	-0.887375640937005	-1.71390779636115		SLC39A11	2	1	-0.482540416785394	4.31270269729882
CCDC3	1	1	2.07600076191791	-2.67918975970954		SLC39A7	2	1	0.945423197678412	3.51710645534784
CCDC33	1	1	-2.32368348843685	-2.40354211948127		SLC5A6	2	1	0.388264965943183	2.20231197454721
CCDC40	1	1	-2.46343837983242	-2.24202211520881		SLC7A1	2	1	-1.61729906804196	3.57230768778115
CCDC69	1	1	2.47860438816913	-0.913501578786076		SLC9A3R1	2	1	-0.519529271193658	4.3608522830227
CCDC80	1	1	1.90565497868427	-3.38713224551886		SOBP	2	1	-0.946025657721673	3.39009587147027
CCDC88B	1	1	2.42840297215351	-0.687599259831608		SP3	2	1	0.235766959122504	2.38928638078958
CCDC88C	1	1	2.11781795018085	-0.981903392293156		SPATA13	2	1	1.32524950497517	1.75714181043893
CCDC92	1	1	-2.39656968719593	-0.0628419699451332		SPATA20	2	1	-0.107083249159967	3.59758703090936
CCM2	1	1	-0.756328511305963	1.1902995524624		SPATS2L	2	1	0.265324664048041	2.32756121136934
CCND1	1	1	1.14672691815266	0.248713415644466		SPHK1	2	1	-0.674198794432794	3.87040452339441
CCND2	1	1	1.78261883252033	-1.12328632495612		SPOP	2	1	-0.448346543379937	4.20381073334008
CCNG2	1	1	-0.566481280394708	1.96421710827142		SPOPL	2	1	0.264805865219916	2.37262825348169
CCNJL	1	1	0.41556437008747	-0.117226678349674		SPR	2	1	0.469959330490912	2.12720940687448
CCR10	1	1	-0.868446755477105	-1.54312666080207		SRBD1	2	1	0.489081215790595	2.22123162128717
CD101	1	1	2.9757219075478	-0.901851493336857		SRF	2	1	1.09987051480183	3.59307638981134
CD109	1	1	1.25322849743732	0.131714266321957		SSH2	2	1	-0.422245550223504	3.34893320181161
CD247	1	1	2.56623466008076	-0.695996123768986		SSH3	2	1	2.07954604618915	3.08325491525918
CD248	1	1	2.20656831257709	-3.24942119739264		STARD13	2	1	-1.52299593693844	3.36684409954339
CD36	1	1	2.18471868031391	-2.33838375232428		STARD3	2	1	-0.233235049315606	3.62047026731759
CD4	1	1	3.27373750203022	-1.12760289333075		STIM1	2	1	1.83394081585773	2.580557842336
CD44	1	1	1.84903604977497	-0.0556145491382485		STK24	2	1	-1.65935446626774	3.65626220085412
CD6	1	1	2.57943065159687	-0.718786078908146		STOX2	2	1	1.30182559483417	1.68925229885369
CD82	1	1	1.55527265065082	-0.338253098942936		STRADA	2	1	-0.434906292029535	4.18461326935083
CD8B	1	1	2.59767873280414	-0.696468669392765		SUPT3H	2	1	1.06904895298847	3.68084959366113
CD9	1	1	0.312564921311225	0.652239960215389		TAF15	2	1	-0.398537087508355	3.9695872483471
CD96	1	1	2.60942800038227	-0.690571147420109		TAF1B	2	1	0.473365616730536	2.15707365848809
CDC42BPA	1	1	2.22083003514179	1.41399673797876		TANC1	2	1	0.349698376587714	2.0074062762478
CDC42BPG	1	1	0.431235861710395	0.836988729021847		TANK	2	1	0.148709130219306	2.30097676493913
CDC42EP3	1	1	0.582871746949042	-3.62502010486335		TAPBP	2	1	1.10869081013569	3.57694409467965
CDC42EP5	1	1	-0.297503519126092	-0.207637387730778		TBC1D16	2	1	0.796656203202094	2.00413398124963
CDC42SE2	1	1	-1.75929434902302	1.23968748428613		TBC1D22B	2	1	1.06530768864521	3.61308394052774
CDCA7L	1	1	-0.86827032572857	0.836455863497555		TBCD	2	1	-0.575597214766656	4.40785638668329
CDH1	1	1	0.353421521118964	0.899407547495663		TCIRG1	2	1	2.04234988682636	2.93134298600942
CDH10	1	1	-0.229783701964532	-2.72628839633673		TCP11L1	2	1	1.55667669766315	2.18072138407022
CDH12	1	1	0.0543347119606388	-3.18270023486823		TEAD1	2	1	1.50254042141804	2.45894016005784
CDH13	1	1	2.37354524128803	-2.87437923572272		TEAD3	2	1	1.08889658444294	3.5202493486622
CDH15	1	1	-0.157321977683221	-4.17768676898688		TET3	2	1	0.5476258515633	2.28455777146608
CDH17	1	1	-0.522503900595819	-0.573633748509586		TEX14	2	1	-0.375025796958123	4.23002020695001
CDH18	1	1	0.0495992421425235	-3.15723999164313		TEX2	2	1	-0.48795502192608	4.32508031704217
CDH2	1	1	1.4247546910561	-2.79857786319464		TFDP1	2	1	-1.65461494333378	3.65234838106424
CDH20	1	1	0.357668948105658	-2.8958969893238		TFEB	2	1	1.09317882054218	3.58173136093408
CDH22	1	1	-0.5939015627586	-2.66294820926398		THADA	2	1	0.521221709183539	2.15461019851953
CDH23	1	1	1.75043733113178	-1.07883151195258		THRA	2	1	-0.250424552031671	3.64365647413522
CDH3	1	1	0.914130043915595	-0.0948856653949623		TJAP1	2	1	1.08205063336262	3.6006303248623
CDH4	1	1	0.0280633687294376	-2.56836183688849		TLCD1	2	1	-0.145311045714532	3.70278678514749
CDH5	1	1	2.71439464085468	-2.42038162372321		TLK2	2	1	-0.433317470618402	4.31305794098169
CDH7	1	1	0.417789053849067	-2.29890592715949		TMBIM1	2	1	0.236332011154975	2.47738282062799
CDH8	1	1	0.03411848538288	-3.27412088535041		TMCO3	2	1	-1.69248478419415	3.69348488428384
CDHR2	1	1	-0.814311194487725	-0.681889611699284		TMEM104	2	1	-0.576914715834771	4.3872468886593
CDHR3	1	1	-2.31120424277416	-2.3454795660755		TMEM131	2	1	0.499798607758368	2.28853867628366
CDHR5	1	1	-0.833275127478753	-0.763795453526676		TMEM135	2	1	2.08234651081928	2.94936281122953
CDK14	1	1	1.11637217991718	-2.9149490179798		TMEM63B	2	1	1.04218394749531	3.69621233322412
CDK15	1	1	1.97016818516621	-1.76896770618171		TMEM80	2	1	1.87968070500263	2.55821367778569
CDK16	1	1	-1.70668010718456	0.389327925226986		TPCN2	2	1	2.1235490559853	2.98643006064683
CDK18	1	1	-0.236448693343316	-1.95625885150641		TRAF3IP1	2	1	0.175996851853217	2.51853160240442
CDK6	1	1	1.01217110150226	-1.14991982600898		TRAM2	2	1	0.984391045502509	3.57833741285592
CDKL3	1	1	-1.80159721083275	1.35186151840478		TRIM37	2	1	-0.438814926215326	4.24521188118249
CDKN1A	1	1	2.74852426045307	0.704235714457333		TRIM44	2	1	1.44500024311909	2.08618794061929
CDKN1C	1	1	1.58580954068073	-2.28416689059943		TRIM47	2	1	-0.521694946356927	4.05151717045099
CDKN2A	1	1	-1.14170192486874	-2.01401718280524		TRIM65	2	1	-0.507626462050592	4.29680578090936
CDON	1	1	0.431687903336371	-2.41014679095954		TRIO	2	1	1.00559813969501	1.70190982200891
CDX1	1	1	-0.430075454779779	-0.453633862950504		TRPT1	2	1	2.19929702275165	3.13080621936113
CDX2	1	1	-0.46953825957409	-0.483551818349064		TSC22D1	2	1	-1.58618860251537	3.55434201338083
CEBPA	1	1	2.07476623051533	-1.2343009295246		TSEN54	2	1	-0.549180555411493	4.37000731804162
CEBPB	1	1	2.4901409863747	0.532273453257381		TSSC4	2	1	1.93247253888019	2.53163319506437
CELF2	1	1	2.37496955387958	-0.879476863362492		TTC7A	2	1	0.54266340725788	1.86380515672952
CELF4	1	1	-0.633751082488214	-2.75759037158698		TUBD1	2	1	-0.455034899779474	4.2809977946499
CELF5	1	1	-1.27478830821148	-1.8918662848255		TUBGCP3	2	1	-1.66559697992436	3.66402463295251
CELSR1	1	1	1.21948416226276	0.261364859125912		UBAC2	2	1	-1.65765537626377	3.65667526104242
CELSR2	1	1	0.908142161301459	0.00727550365716167		UBE2E3	2	1	0.324492049149359	2.32020677306443
CELSR3	1	1	-1.21341125971905	-2.37585075519294		UBE2O	2	1	-0.510332036086236	4.34907392837793
CERCAM	1	1	1.95784337513813	-3.54534204623908		UBTF	2	1	-0.446784424849664	4.11464576103479
CERKL	1	1	-2.35514332658878	-2.42966325900763		UNK	2	1	-0.546272921630059	4.36477760650903
CFD	1	1	1.80264813893207	-2.22536094806403		USP32	2	1	-0.430051374503289	4.26600221969873
CFTR	1	1	-0.178251314231073	-0.386300641514957		UVRAG	2	1	2.09719855778583	2.95117050089627
CGA	1	1	-0.257422733374749	-2.50311620853156		UXS1	2	1	0.533226323059882	2.21886740305215
CGB5	1	1	0.485155892304267	-0.0624810042163735		VEGFB	2	1	2.20141561024555	3.11374742963105
CGN	1	1	0.097897839478339	0.938616198084652		VPS37C	2	1	2.13744742863544	3.14774949528962
CGNL1	1	1	1.34557254307636	-0.376063662984074		VPS54	2	1	0.518426966599311	2.23429323413163
CHD5	1	1	-0.694282460280572	-2.54547603748053		VRK2	2	1	0.264672350815619	2.29094697215348
CHFR	1	1	-2.15851557559601	0.0150827584484214		WBP1	2	1	0.534090351990546	2.09672747232705
CHI3L2	1	1	1.96182925694355	-0.0809391321918373		WDFY2	2	1	-1.61310376531712	3.6488954839924
CHIT1	1	1	3.13108832829365	-1.33005245349616		WDR12	2	1	0.247944903305854	2.35931850650102
CHN1	1	1	1.9220474480904	-3.28261621616095		WDR74	2	1	2.15060336583027	3.05791820266038
CHN2	1	1	-0.629237103530084	0.330718201182186		WIPF2	2	1	-0.260068821974908	3.66075078823358
CHRM1	1	1	-0.0189663649283993	-0.00592787883490375		WWC2	2	1	-1.467988359996	3.08551098086625
CHRM3	1	1	0.103346180847968	-3.21250684879035		WWTR1	2	1	1.31661040776142	1.72207848408014
CHRM5	1	1	-0.775033998557245	-1.9599986853382		XPO4	2	1	-1.65281717784039	3.62270711042672
CHRNA4	1	1	0.0994170426643741	-1.86940487048835		XRCC5	2	1	0.258013796738471	2.44569150783807
CHRNA7	1	1	-0.000884461470757714	-0.665818768956364		YAP1	2	1	1.53770215504536	2.64625301264912
CHRNB4	1	1	-0.366017866202508	-1.92420538089484		YPEL2	2	1	-0.523370790549432	4.2286330876568
CHST11	1	1	1.73533112995991	-1.06323297641486		ZBTB20	2	1	1.22930319302448	1.58942095615655
CHST12	1	1	-0.793785381385003	1.18414418079644		ZDHHC24	2	1	2.21962506764301	3.14250169374734
CHST15	1	1	-5.2142211114159e-05	-1.92276533267707		ZFAND3	2	1	1.04457743161091	3.64114729740411
CHST8	1	1	-0.815171766348993	-2.49592407367438		ZNF652	2	1	-0.4375215054237	4.22219149448663
CHST9	1	1	-0.31242852217785	-1.40712459705085		ZNF710	2	1	1.25583918087849	2.05108378507882
CHSY3	1	1	2.20252997868427	-3.5118146719715		ZNF827	2	1	1.18548209660419	1.78347007610589
CIB4	1	1	0.331663441590155	-2.34750469348639		ZRANB3	2	1	0.46183164112934	2.29776127316743
CIITA	1	1	3.23477990620502	-0.704326230504215
CILP2	1	1	1.90888602726826	-3.53814037463874
CKB	1	1	0.500396323136176	-1.63239439151496
CLCF1	1	1	2.70283229344257	0.523311775706112
CLCN3	1	1	-0.65638296610943	2.08722857811242
CLCNKA	1	1	0.0213399647987735	-1.73341854236335
CLDN11	1	1	-0.186099338599359	-2.41105754993171
CLDN14	1	1	-0.659909296103631	-1.14567311427802
CLDN4	1	1	0.341180634430732	1.01582042553216
CLDN6	1	1	-0.57054882056347	-1.79227169177741
CLDN9	1	1	-0.587489056655084	-1.75155790469855
CLIC4	1	1	1.06334145062336	-3.54325492999762
CLIC5	1	1	1.42314083569416	-1.61985214374274
CLIC6	1	1	-0.129611897536432	-0.944507438161076
CLINT1	1	1	-1.7042571187698	1.17797998764306
CLIP1	1	1	-2.26295318014256	0.0546971974590416
CLIP2	1	1	1.01768238537678	-1.51261003635138
CLMN	1	1	-0.152628350325738	0.319595259211361
CLSTN2	1	1	0.719173741272773	-1.67824514529914
CLVS1	1	1	1.29823000424274	0.491520327112972
CMKLR1	1	1	3.31577832692036	-1.27729042194098
CMTM4	1	1	-1.16889356381527	1.57675294258386
CMTM7	1	1	0.867626023224677	-0.551601964451969
CNBD1	1	1	0.0631170987404239	-3.19160230777472
CNGB1	1	1	0.8569360493935	-0.971958476521671
CNGB3	1	1	0.0575922250069034	-3.24688347003669
CNIH3	1	1	1.34207613461384	-1.55167778156012
CNNM1	1	1	-0.787663865157281	-1.92525489948005
CNNM4	1	1	0.355933737686957	1.26597837784082
CNPY1	1	1	-0.378738808699762	-2.44624288699836
CNST	1	1	2.28816134922871	1.41197971679956
CNTFR	1	1	0.136578392914618	-2.02535207889289
CNTN1	1	1	0.464307856491889	-2.73834045551032
CNTN4	1	1	1.34879262440571	-2.75802143237799
CNTN5	1	1	0.160553049973334	-2.95457323215216
CNTNAP1	1	1	-1.59454290873638	-1.91148718021125
CNTNAP2	1	1	-0.42075519568554	-1.83308513782233
CNTNAP5	1	1	-0.0228310108863461	-3.17900093219489
COBL	1	1	0.123662781647528	0.849117678187191
COBLL1	1	1	0.760411810807074	-1.47565181873053
COL12A1	1	1	2.05171926014789	-3.5055251898548
COL13A1	1	1	1.32591469281086	-0.806694585301579
COL15A1	1	1	2.16079719059833	-2.82757576129645
COL16A1	1	1	2.02834041111835	-3.41370065829963
COL18A1	1	1	2.55162532322773	-2.85537155292243
COL1A1	1	1	2.11134297840961	-3.62484987399787
COL20A1	1	1	-0.0124847174369442	-2.81454380176276
COL21A1	1	1	0.939550232819403	-2.87472017429084
COL22A1	1	1	0.0333958386696231	-1.76942451617926
COL23A1	1	1	0.316413235596503	-2.04671104572028
COL24A1	1	1	1.97982151501545	-3.5166073622486
COL25A1	1	1	1.02099115841755	-3.24107797763556
COL27A1	1	1	-1.07533930546871	-1.26177390239447
COL28A1	1	1	0.0567751645363224	-3.23586567065924
COL2A1	1	1	0.437322688034858	-1.53655012271613
COL4A1	1	1	2.50167281620869	-2.80339439532965
COL4A2	1	1	2.50924069874653	-2.85468633792609
COL4A6	1	1	1.00818760388264	-0.646521646001041
COL5A1	1	1	2.08033330433735	-3.56899889133185
COL5A3	1	1	2.18592936985859	-3.26864059589118
COL6A1	1	1	2.10023457997211	-3.46326597354621
COL6A3	1	1	2.02825362675556	-3.48345907352179
COL7A1	1	1	0.935835671357001	-0.268500644185246
COL8A1	1	1	1.90377600186237	-3.52911003253669
COL8A2	1	1	2.07168157093891	-3.37158401630133
COL9A3	1	1	1.07389981739887	-1.85953767917365
COLEC12	1	1	2.68668611042866	-1.72345979831427
COMMD10	1	1	-1.69455732709995	1.34840468742639
COPZ1	1	1	-2.17446658320061	0.0768090901592369
CORO1A	1	1	2.65557200901874	-0.792219716527164
CORO1C	1	1	-1.85644828087917	0.183185022852718
CORO2B	1	1	1.10447556965717	-2.3111573042652
COX19	1	1	-0.776086735793267	1.23404530861169
CPA5	1	1	2.26810414784321	-0.981914121129215
CPA6	1	1	0.925336432389106	-1.8716517271778
CPAMD8	1	1	0.384251904419745	-0.70401461742133
CPE	1	1	-1.5134352625095	-0.880627948262394
CPEB1	1	1	-0.640696334906732	-1.7743674101612
CPEB2	1	1	-0.803980517455255	2.3211723683098
CPEB4	1	1	-1.73651375181309	1.17991475441247
CPLX1	1	1	-1.14081161028973	-2.16392715594977
CPLX2	1	1	-0.646284508773004	-2.73956545016974
CPNE4	1	1	0.0369444608009708	-2.09431322238654
CPNE5	1	1	2.24775226109394	-1.15294917247504
CPNE7	1	1	-0.988742399283563	-2.31946476123542
CPPED1	1	1	0.457042765549506	-2.34536274097174
CPS1	1	1	-0.42208735949627	-1.01288922450751
CPVL	1	1	3.0088873624123	-1.35964401385993
CPXM2	1	1	1.4070864438332	-3.31533773563117
CPZ	1	1	1.80048067562946	-3.38054187915534
CRABP2	1	1	0.698249411515082	-0.100469428517521
CRADD	1	1	-2.1357551694595	0.0738534150341148
CRB1	1	1	0.0270884751594913	-2.86777122638434
CRB2	1	1	0.358810734680976	-1.05875952861518
CREB3L1	1	1	2.01366765492329	-3.58746297977179
CREB5	1	1	1.62698681347736	-1.6045881094715
CRHR2	1	1	-0.158355283805047	-3.38618000171393
CRIM1	1	1	1.38927180760273	-1.11927517078131
CRIP1	1	1	-1.15150271660915	0.685789984247982
CRIP2	1	1	-1.24463139779202	0.768583577654659
CRISPLD2	1	1	2.06692273610004	-3.54092033527106
CRLF1	1	1	0.413266730240668	-2.70832355640143
CRMP1	1	1	-0.9419240236961	-1.96100385806769
CRTAC1	1	1	1.41691191189655	-1.66880186221808
CRYBG3	1	1	0.155013871125067	-0.269115525700748
CRYGN	1	1	0.977560353211249	-2.67466552875251
CRYM	1	1	-0.331381726332818	-1.04905946872443
CSDC2	1	1	1.41926438801655	-3.35096557758063
CSF1R	1	1	3.33694512837299	-1.31258209369391
CSGALNACT1	1	1	0.31283957951435	-1.50799997470588
CSH1	1	1	-0.28624706275097	-2.13094671390265
CSMD1	1	1	0.0875123261726749	-3.18180711887091
CSMD2	1	1	2.03121097081074	-3.4160009207508
CSMD3	1	1	0.202918600968207	-3.04220636508673
CSPG4	1	1	2.32715947621235	-2.73571642062873
CSRNP1	1	1	2.7247977971352	0.511844080469906
CSRP1	1	1	0.836213898590888	-3.80669077060431
CSRP2	1	1	-1.91498353637091	-0.246683675267399
CSTB	1	1	1.10842878811725	-0.0710402312061196
CT62	1	1	0.447864603928412	-0.562078792073429
CTBP1	1	1	-0.876011061736261	2.41737086751252
CTCFL	1	1	-0.726093459197198	-1.8770604910633
CTDP1	1	1	1.32511360638508	0.778724711916744
CTDSP2	1	1	-2.29117213494412	0.161205214045345
CTF1	1	1	-1.05801479823223	-1.68353088519782
CTNNA1	1	1	-1.7329451025211	1.17974881508142
CTNNA2	1	1	0.159249377182807	-2.32104452274054
CTNNA3	1	1	0.410466980866278	-3.91655262134284
CTNND2	1	1	-0.395646977492486	-2.57932146213263
CTSD	1	1	3.37520034306415	-1.32881124637336
CTTNBP2	1	1	1.06101377003559	-1.32928999088019
CUBN	1	1	-0.031675028868829	-1.43104370258063
CUX2	1	1	0.371517252854193	-0.427055913426579
CX3CL1	1	1	0.147278141907538	-0.533000308491886
CXCL12	1	1	1.81716520779499	-3.25255878589362
CXXC5	1	1	-1.46021609313122	1.16226081230432
CYB561D1	1	1	-1.07105408913723	1.46213130333215
CYB5A	1	1	-0.213013696738397	0.0553909955242271
CYB5R1	1	1	2.25665528767475	1.36231927253991
CYFIP2	1	1	2.15487058155903	-0.68119795940131
CYGB	1	1	2.33585984700092	-2.72731359622687
CYP11A1	1	1	1.04414756291279	-0.453494864918888
CYP19A1	1	1	2.83665330403217	-1.61167486331672
CYP1B1	1	1	1.79859311573871	-2.90628822467536
CYP26B1	1	1	0.865129065445746	-1.63581951282233
CYS1	1	1	1.21817643635639	-3.09611900470465
CYTH3	1	1	-0.734162139960443	1.07463149406701
CYTH4	1	1	3.2561321973122	-1.00373156688422
DAAM2	1	1	1.32000215046772	-3.43829115054816
DAB1	1	1	0.482159924439276	-1.95926483295173
DACH1	1	1	0.784087252549018	-1.24909647128791
DACT3	1	1	0.968707632950629	-3.66892965457648
DAGLB	1	1	-0.781627941199456	1.23732666351587
DAP	1	1	-1.04677431590191	1.09787325241357
DAPK1	1	1	-0.233737635680352	-0.695542413212956
DAPK2	1	1	0.16089899533161	0.53532282688409
DAZAP2	1	1	-2.09407127208344	0.027769964716732
DBH	1	1	-0.0525672913276303	-1.39225919864386
DBN1	1	1	-1.56020002371899	1.05315796711236
DCC	1	1	0.698333096436347	-2.3725496115467
DCDC1	1	1	-2.37424986369244	-2.2668629469654
DCDC2	1	1	-0.394968676634942	0.131331604502499
DCHS1	1	1	2.26192433827289	-3.03257473132819
DCHS2	1	1	0.533042502335395	-2.12483747623175
DCLK1	1	1	0.00890047543414951	-2.52863605640143
DCLK2	1	1	1.10235197537311	-3.3426366629383
DCTD	1	1	-0.592120456763421	2.01542935945779
DDAH1	1	1	0.0752442597664249	0.751030486605465
DDC	1	1	-0.819507527419244	-0.765823680379093
DDIT3	1	1	-1.65847368843189	-0.35216005466193
DDR2	1	1	1.44946010105976	-3.22285183093756
DDX54	1	1	-2.23528716272942	-0.0567508520862465
DDX59	1	1	2.22680099003681	1.2728749928692
DDX60L	1	1	3.35568864338764	-0.224773484685123
DEC1	1	1	0.492710900238837	-1.04457052371711
DEGS2	1	1	0.456846308640326	0.740113061449825
DENND2A	1	1	1.66356546872028	-2.13247402332038
DENND5B	1	1	-0.679826903411065	-0.578550654866398
DEPDC4	1	1	-2.38703979856602	0.294968050501644
DGAT2	1	1	1.31651885502705	-0.8045392813465
DGKB	1	1	0.0531183003700626	-3.08185966632575
DGKE	1	1	0.201255392960395	1.3416485009411
DGKG	1	1	-1.54543595320812	-0.940626698949039
DGKI	1	1	0.541424584320868	-2.52109869144172
DGKQ	1	1	-0.891582655974542	2.42884339072496
DHRSX	1	1	-1.36126886613003	0.305291098139584
DIAPH1	1	1	-1.72079728848568	1.18523494579583
DIAPH2	1	1	-0.833231735297357	0.114379089854061
DIP2B	1	1	-2.20343943245045	0.056080978892147
DISC1	1	1	1.37939102642902	-1.35622127673835
DIXDC1	1	1	0.850472283295478	-3.81766040942878
DKK2	1	1	1.77053577893146	-3.39630468509406
DKK3	1	1	1.67741758816608	-3.10289152286261
DLC1	1	1	1.76890547268757	-1.96082599780768
DLEC1	1	1	-2.28994833237759	-2.37145765445441
DLEU7	1	1	3.25747401707538	-1.23452957294196
DLG2	1	1	0.846624445847358	-2.48403938434333
DLG4	1	1	-1.63469805128208	-1.8366232695362
DLGAP1	1	1	1.13690550320515	-2.03395088336676
DLGAP2	1	1	0.338601183823432	-2.38717134616584
DLL1	1	1	2.17608506672748	-2.36824186465949
DLL3	1	1	-1.10501139170757	-2.0920468153736
DLX1	1	1	0.525395941666449	-1.63281639239997
DLX2	1	1	0.558372092179145	-1.45960386417121
DLX3	1	1	0.884246182373847	-0.369721490361393
DLX4	1	1	0.127230715683783	-1.72833021304816
DMD	1	1	0.627784085205878	-3.51825864932746
DMRT1	1	1	-0.345103907653009	-2.05692918918341
DNAH11	1	1	-2.18890460140339	-2.07548673770636
DNAH17	1	1	0.447567057541693	-1.35972936771125
DNAH2	1	1	-2.19519988007179	-2.36861236713141
DNAH3	1	1	-2.31895567781559	-2.39892252109259
DNAH9	1	1	-2.29422803527943	-2.41868551395148
DNAI1	1	1	-2.30735175616375	-2.37386329791755
DNAJC1	1	1	-0.845252919264947	-0.184634047963322
DNAJC5B	1	1	3.24927623265156	-1.25735242984504
DNAJC6	1	1	-0.622540998526727	-2.09382732532233
DNASE1	1	1	-0.111614275046502	-1.71660478732795
DNER	1	1	-0.355202961035882	-2.11130436084479
DNM1	1	1	-0.684287595816766	-2.85260351321906
DNM3	1	1	0.313877892426337	-2.49085386417121
DNTT	1	1	0.86443288319477	-2.18018253467292
DOC2B	1	1	0.961652827195014	-3.01078613422126
DOCK10	1	1	3.06290490620502	-1.08268888614386
DOCK11	1	1	-0.605852174826776	2.82593642600566
DOCK2	1	1	3.1971951245583	-1.02663071773261
DOCK3	1	1	0.639265847138251	-2.43709762714118
DOCK4	1	1	2.99270637028583	-1.60103805682868
DOCK6	1	1	2.69737012379536	-2.50213487765998
DOCK8	1	1	3.04523522847065	-0.959135848500431
DOK1	1	1	2.34157378666767	-1.41078766010016
DOK3	1	1	3.17484385960468	-1.0339425387165
DOK4	1	1	-0.798889565535699	-0.709618169285954
DOK5	1	1	1.49031050198444	-3.28660019061774
DOK6	1	1	1.29862124913105	-3.17814739368171
DOK7	1	1	0.390145850113715	-0.557531434514225
DPEP1	1	1	0.050738882950629	-1.17685778758735
DPF3	1	1	-0.758837151595269	-0.578285294987858
DPP10	1	1	0.219419312409247	-2.17165239474982
DPP6	1	1	0.147279810837592	-2.77165229938239
DPY19L1	1	1	-0.816983270713006	0.804125112078487
DPYD	1	1	3.01438910954365	-1.1113327326557
DPYS	1	1	-0.647469568320428	-1.09935410640448
DPYSL5	1	1	-0.672836232253228	-2.4202824415943
DRAM1	1	1	0.61579687588581	-0.958523589589298
DRD1	1	1	-0.00036971575847744	-2.83881099841803
DRGX	1	1	0.077448677948798	-1.64882906100959
DSCAM	1	1	-0.185469079085504	-2.6176610770008
DSCAML1	1	1	-0.126071262427484	-2.58152301929206
DSP	1	1	0.608112645081366	0.783293407938778
DST	1	1	1.00259501927265	-0.489116984822453
DTNA	1	1	0.61792500012287	-2.91501768253058
DTX1	1	1	1.47797353260883	-0.859852868535221
DUOX1	1	1	0.670548510483588	-1.56389244220465
DUSP15	1	1	-0.834648299285089	-1.70854099414557
DUSP16	1	1	-1.73458062417141	0.0080122170665855
DUSP27	1	1	-0.171085286208307	-4.21918161533087
DUSP8	1	1	2.74807031147846	0.541677158854305
DYM	1	1	1.29928262226948	0.869817894480526
DYNC1I1	1	1	0.177814078263129	-3.16975696704596
DYNLL1	1	1	-2.01908049385331	-0.129974681355656
DYRK3	1	1	2.33143336766132	1.17434338905603
DYSF	1	1	2.71223170750507	-2.56352146289557
EBF1	1	1	2.16820437901386	-2.746884423711
EBF2	1	1	1.82225472920307	-2.67377622745246
EBF3	1	1	1.81230647557148	-2.59381826541632
[truncated: 2,215 more rows]
[truncated: 64 more columns]

[truncated: 1 more sheets: AP-2γ - PAM50]
